# Supplementary material for: The regulatory genome constrains protein sequence evolution: implications for the search for disease-associated genes
Source: PeerJ. 2020 Jul 21;8:e9554. doi: 10.7717/peerj.9554 (PMC7380284; doi:10.7717/peerj.9554)
Supplement: Supplemental Information 2 [file peerj-08-9554-s002.xlsx]

## Sheet: SupplementaryTable1_sampleAndGe
Number of genes called expressed in each tissue and number of expressed genes for which we have evolutionary statistics
Tissue	Number_of_Samples_Tissue	Genes_With_Evolution_Data
Adipose_Subcutaneous	245	15564
Adipose_Visceral_Omentum	157	15672
Adrenal_Gland	98	15510
Artery_Aorta	170	15277
Artery_Coronary	95	15442
Artery_Tibial	233	14835
Bladder	9	16276
Brain_Amygdala	57	15728
Brain_Anterior_cingulate_cortex_BA24	65	15609
Brain_Caudate_basal_ganglia	83	15836
Brain_Cerebellar_Hemisphere	77	15701
Brain_Cerebellum	89	16008
Brain_Cortex	80	15881
Brain_Frontal_Cortex_BA9	79	15718
Brain_Hippocampus	70	15872
Brain_Hypothalamus	71	16128
Brain_Nucleus_accumbens_basal_ganglia	78	15909
Brain_Putamen_basal_ganglia	69	15647
Brain_Spinal_cord_cervical_c_1	51	15905
Brain_Substantia_nigra	46	15686
Breast_Mammary_Tissue	148	16188
Cells_EBV_transformed_lymphocytes	85	14101
Cells_Transformed_fibroblasts	219	14186
Cervix_Ectocervix	4	15437
Cervix_Endocervix	2	13947
Colon_Sigmoid	108	15682
Colon_Transverse	138	16055
Esophagus_Gastroesophageal_Junction	109	15463
Esophagus_Mucosa	207	15493
Esophagus_Muscularis	183	15299
Fallopian_Tube	4	15522
Heart_Atrial_Appendage	133	15209
Heart_Left_Ventricle	162	14628
Kidney_Cortex	21	16303
Liver	82	14883
Lung	238	16199
Minor_Salivary_Gland	42	16085
Muscle_Skeletal	300	14157
Nerve_Tibial	205	15920
Ovary	66	15741
Pancreas	119	15288
Pituitary	76	16554
Prostate	69	16451
Skin_Not_Sun_Exposed_Suprapubic	161	16179
Skin_Sun_Exposed_Lower_leg	256	16080
Small_Intestine_Terminal_Ileum	63	16309
Spleen	68	15719
Stomach	137	15945
Testis	127	18269
Thyroid	231	16139
Uterus	57	15720
Vagina	66	16128
Whole_Blood	275	13834
