# Supplementary material for: The regulatory genome constrains protein sequence evolution: implications for the search for disease-associated genes
Source: PeerJ. 2020 Jul 21;8:e9554. doi: 10.7717/peerj.9554 (PMC7380284; doi:10.7717/peerj.9554)
Supplement: Supplemental Information 3 [file peerj-08-9554-s003.xlsx]

## Sheet: AllTissue_COV_results
Tissue	Spearman_rho_var/mean_dnds_mouse	p-value_var/mean_dnds_mouse	Spearman_rho_var/mean_dn_mouse	p-value_var/mean_dn_mouse	Spearman_rho_var/mean_ds_mouse	p-value_var/mean_ds_mouse	Spearman_rho_var_dnds_mouse	p-value_var_dnds_mouse	Spearman_rho_var_dn_mouse	p-value_var_dn_mouse	Spearman_rho_var_ds_mouse	p-value_rho_var_ds_mouse	Spearman_rho_mean_dnds_mouse	p-value_mean_dnds_mouse	Spearman_rho_mean_dn_mouse	p-value_mean_dn_mouse	Spearman_rho_mean_ds_mouse	p-value_mean_ds_mouse	Spearman_rho_var/mean_dnds_chimp	p-value_var/mean_dnds_chimp	Spearman_rho_var/mean_dn_chimp	p-value_var/mean_dn_chimp	Spearman_rho_var/mean_ds_chimp	p-value_var/mean_ds_chimp	Spearman_rho_var_dnds_chimp	p-value_var_dnds_chimp	Spearman_rho_var_dn_chimp	p-value_var_dn_chimp	Spearman_rho_var_ds_chimp	p-value_rho_var_ds_chimp	Spearman_rho_mean_dnds_chimp	p-value_mean_dnds_chimp	Spearman_rho_mean_dn_chimp	p-value_mean_dn_chimp	Spearman_rho_mean_ds_chimp	p-value_mean_ds_chimp
Adipose_Subcutaneous	-0.19794	4.14356e-155	-0.187766	1.69393e-139	-0.014545	0.0535573	-0.273967	5.53095e-302	-0.308545	0	-0.142708	4.12002e-81	-0.301384	0	-0.359382	0	-0.213953	3.36219e-182	-0.18104	2.82377e-112	-0.134895	1.0385e-66	0.0435078	2.98636e-08	-0.238747	9.30271e-197	-0.229347	4.0214e-193	-0.0340188	1.42729e-05	-0.254774	1.07446e-224	-0.269747	3.6214e-269	-0.0821358	9.36404e-26
Adipose_Visceral_Omentum	-0.175815	4.75035e-122	-0.18574	3.11295e-136	-0.0367809	1.07054e-06	-0.255405	2.23561e-261	-0.293067	0	-0.136512	2.56702e-74	-0.296465	0	-0.350422	0	-0.197855	1.39139e-155	-0.172599	5.89514e-102	-0.146093	6.0289e-78	0.0128901	0.100959	-0.229486	1.53574e-181	-0.223892	6.60337e-184	-0.0377424	1.47241e-06	-0.254754	1.16414e-224	-0.265935	2.15439e-261	-0.0746851	1.45897e-21
Adrenal_Gland	-0.248225	4.21885e-245	-0.261897	1.33044e-273	-0.0732991	2.21588e-22	-0.292106	0	-0.336554	0	-0.165861	2.78283e-109	-0.303184	0	-0.363863	0	-0.216383	2.04757e-186	-0.198485	8.28652e-135	-0.173835	4.95204e-110	0.00274218	0.727173	-0.236863	1.31229e-193	-0.238238	1.13944e-208	-0.0520888	2.98499e-11	-0.245109	1.32567e-207	-0.264613	1.00306e-258	-0.0889531	6.13355e-30
Artery_Aorta	-0.22571	3.2283e-202	-0.235038	1.37908e-219	-0.0563219	7.47393e-14	-0.287029	0	-0.327961	0	-0.157987	3.31609e-99	-0.313125	0	-0.372868	0	-0.219457	8.02908e-192	-0.201193	1.10015e-138	-0.17179	1.41366e-107	0.00871756	0.267111	-0.242887	8.85323e-204	-0.240767	3.25934e-213	-0.0464822	3.0108e-09	-0.255874	1.09248e-226	-0.272741	2.29594e-275	-0.0850922	1.57779e-27
Artery_Coronary	-0.21532	2.22866e-183	-0.222379	9.01587e-196	-0.0442195	4.52324e-09	-0.282508	8.89318162514244e-322	-0.320269	0	-0.145478	2.99859e-84	-0.31227	0	-0.370187	0	-0.212331	2.0491e-179	-0.190038	1.66531e-123	-0.155503	3.94145e-88	0.027821	0.000400751	-0.241241	5.67681e-201	-0.233161	1.03598e-199	-0.0323216	3.73965e-05	-0.259874	5.10336e-234	-0.273392	1.00837e-276	-0.0796621	2.5547e-24
Artery_Tibial	-0.260786	1.4725e-271	-0.276751	6.12036e-307	-0.0844083	3.31945e-29	-0.312973	0	-0.361829	0	-0.187261	2.74542e-139	-0.326447	0	-0.393604	0	-0.243639	2.60115e-237	-0.219233	7.78875e-165	-0.196189	2.90282e-140	-0.00295165	0.707191	-0.2593	5.86949e-233	-0.263773	4.86611e-257	-0.0613208	4.9763e-15	-0.264783	3.43503e-243	-0.28776	1.17989e-307	-0.098267	3.40517e-36
Bladder	-0.17336	3.61946e-117	-0.180777	2.09882e-127	-0.0426271	1.93433e-08	-0.2645	7.25484e-281	-0.30341	0	-0.145725	1.56353e-84	-0.308693	0	-0.364924	0	-0.208491	6.48367e-173	-0.158882	1.27354e-85	-0.129854	3.33401e-61	0.0199798	0.0114345	-0.229971	2.5516e-182	-0.221034	3.54769e-179	-0.0323157	3.75192e-05	-0.259198	9.0461e-233	-0.268626	7.22675e-267	-0.0751624	8.0789e-22
Brain_Amygdala	-0.348146	0	-0.359961	0	-0.10659	3.20882e-45	-0.391569	0	-0.431316	0	-0.183245	2.3092e-133	-0.403587	0	-0.456454	0	-0.221755	6.40002e-196	-0.256826	5.83639e-226	-0.230876	1.47569e-193	-0.00312839	0.691592	-0.299188	4.090230304813e-313	-0.288313	0	-0.038593	8.49918e-07	-0.306212	0	-0.307059	0	-0.0635322	5.0472e-16
Brain_Anterior_cingulate_cortex_BA24	-0.388171	0	-0.41338	0	-0.151322	6.08374e-90	-0.418659	0	-0.463723	0	-0.205184	2.02321e-167	-0.4222	0	-0.475219	0	-0.22739	3.64635e-206	-0.288824	2.9915e-288	-0.268883	9.07858e-265	-0.0207919	0.0083227	-0.317824	0	-0.307341	0	-0.0443034	1.5793e-08	-0.317439	0	-0.31411	0	-0.058867	5.74678e-14
Brain_Caudate_basal_ganglia	-0.336651	0	-0.353657	0	-0.115409	4.2147e-53	-0.383142	0	-0.425402	0	-0.187985	2.26489e-140	-0.398938	0	-0.453575	0	-0.225229	3.35021e-202	-0.252943	3.08901e-220	-0.230007	3.44546e-193	-0.00919608	0.242187	-0.29283	1.95459e-299	-0.28545	1.47852e-302	-0.0439432	2.06203e-08	-0.302769	5.65211098842386e-321	-0.305612	0	-0.0659052	3.96469e-17
Brain_Cerebellar_Hemisphere	-0.339896	0	-0.362932	0	-0.129443	4.25136e-66	-0.384075	0	-0.434237	0	-0.208902	1.32142e-173	-0.391797	0	-0.453463	0	-0.243309	1.17703e-236	-0.25755	1.71658e-227	-0.24165	1.21889e-212	-0.0275654	0.000468666	-0.29201	1.07079e-297	-0.292548	2.23965886047587e-318	-0.0605469	1.08788e-14	-0.293611	4.25549e-301	-0.305427	0	-0.0792668	4.29259e-24
Brain_Cerebellum	-0.333127	0	-0.335573	0	-0.0660441	2.22558e-18	-0.390052	0	-0.429709	0	-0.178102	5.65897e-126	-0.395438	0	-0.452805	0	-0.230005	5.14178e-211	-0.25475	6.03901e-223	-0.20745	2.37899e-156	0.0308891	8.69914e-05	-0.29798	1.72438769963355e-310	-0.279878	1.86537e-290	-0.0261801	0.00083995	-0.295967	3.85167e-306	-0.298823	0	-0.0620222	2.42877e-15
Brain_Cortex	-0.343687	0	-0.344577	0	-0.0705991	6.5646e-21	-0.403365	0	-0.435856	0	-0.162892	2.01509e-105	-0.419222	0	-0.4675	0	-0.211988	7.88886e-179	-0.256807	9.1645e-228	-0.209518	2.77008e-160	0.0376763	1.59602e-06	-0.306528	0	-0.280328	2.01021e-291	-0.00988378	0.207491	-0.313852	0	-0.303798	0	-0.0437101	2.44786e-08
Brain_Frontal_Cortex_BA9	-0.364475	0	-0.383076	0	-0.124575	2.11887e-61	-0.409486	0	-0.451959	0	-0.195637	4.32362e-152	-0.423244	0	-0.477645	0	-0.23247	1.20466e-215	-0.278536	9.03804e-268	-0.25453	7.82608e-237	-0.0111399	0.157208	-0.314402	0	-0.303194	0	-0.0418238	9.49883e-08	-0.318127	0	-0.317429	0	-0.0641013	2.76511e-16
Brain_Hippocampus	-0.357924	0	-0.377159	0	-0.122151	4.56642e-59	-0.396648	0	-0.43774	0	-0.186124	1.34992e-137	-0.406594	0	-0.458979	0	-0.219907	1.27534e-192	-0.263431	1.79821e-238	-0.239854	1.43466e-209	-0.00758471	0.335718	-0.300582	3.67648940582779e-316	-0.289046	1.63524741973219e-310	-0.0380325	1.22237e-06	-0.307651	0	-0.306619	0	-0.0602323	1.49093e-14
Brain_Hypothalamus	-0.354597	0	-0.375282	0	-0.12845	2.35399e-65	-0.393433	0	-0.434994	0	-0.189512	1.13825e-142	-0.4031	0	-0.456011	0	-0.222416	4.16615e-197	-0.264333	9.79182e-241	-0.242936	1.28056e-215	-0.0120439	0.125891	-0.299233	3.26433838430066e-313	-0.290216	3.95909736935254e-313	-0.0427071	5.06956e-08	-0.30564	0	-0.306921	0	-0.0650557	9.96082e-17
Brain_Nucleus_accumbens_basal_ganglia	-0.349415	0	-0.371788	0	-0.13381	1.14335e-70	-0.392192	0	-0.437225	0	-0.198293	2.81318e-156	-0.403924	0	-0.458934	0	-0.227697	9.8728e-207	-0.261095	2.23118e-234	-0.242262	4.52752e-214	-0.0205859	0.00894488	-0.298221	5.17745928179224e-311	-0.2925	2.87712211936608e-318	-0.0492077	3.40357e-10	-0.304982	0	-0.307508	0	-0.0667305	1.60203e-17
Brain_Putamen_basal_ganglia	-0.357896	0	-0.382073	0	-0.139234	2.39536e-76	-0.39129	0	-0.435446	0	-0.194582	1.90792e-150	-0.399855	0	-0.452932	0	-0.220521	1.03124e-193	-0.27109	8.87721e-253	-0.252459	1.42857e-232	-0.0210264	0.00762578	-0.302474	2.53356863187391e-320	-0.294983	0	-0.0464721	3.03455e-09	-0.305271	0	-0.30543	0	-0.0623003	1.82363e-15
Brain_Spinal_cord_cervical_c1	-0.309836	0	-0.321536	0	-0.0842409	6.8355e-29	-0.357095	0	-0.399176	0	-0.174953	1.46998e-121	-0.3648	0	-0.42379	0	-0.227102	1.23889e-205	-0.242837	5.6316e-202	-0.210188	2.23812e-160	0.0121336	0.123467	-0.282787	1.5499e-278	-0.27613	1.78955e-282	-0.0412071	1.46174e-07	-0.286284	1.02781e-285	-0.299718	0	-0.0811249	3.66017e-25
Brain_Substantia_nigra	-0.370341	0	-0.386809	0	-0.119288	2.69689e-56	-0.394585	0	-0.436914	0	-0.187219	3.16914e-139	-0.388004	0	-0.442967	0	-0.221686	8.50901e-196	-0.276642	2.04341e-263	-0.247526	3.8047e-223	-0.00189328	0.810247	-0.305077	0	-0.294177	4.54540394173947e-322	-0.0393444	5.18149e-07	-0.299883	1.24449837827424e-314	-0.305248	0	-0.069342	8.46364e-19
Breast_Mammary_Tissue	-0.172965	2.031e-118	-0.175485	6.85612e-122	-0.0174279	0.0206829	-0.263148	6.42068e-278	-0.297258	0	-0.12858	4.50322e-66	-0.300391	0	-0.355029	0	-0.19995	6.41902e-159	-0.163305	1.82312e-91	-0.120966	6.21022e-54	0.0411154	1.61885e-07	-0.23	2.29272e-182	-0.21683	2.43707e-172	-0.0250701	0.00138553	-0.254387	5.35372e-224	-0.264214	6.33074e-258	-0.0727548	1.53402e-20
Cells_EBVtransformed_lymphocytes	-0.168109	9.24618e-112	-0.195772	1.24565e-151	-0.0991772	9.8629e-40	-0.213687	9.63965e-182	-0.269315	1.68612e-291	-0.184728	1.55363e-135	-0.23108	4.98808e-213	-0.299492	0	-0.225295	2.53429e-202	-0.153196	1.53526e-80	-0.170723	2.91717e-106	-0.0607287	1.00835e-14	-0.193479	1.27404e-128	-0.232778	4.82121e-199	-0.108342	1.14707e-43	-0.204512	8.55058e-144	-0.255141	4.60119e-240	-0.131948	4.41912e-64
Cells_Transformed_fibroblasts	-0.227403	2.27714e-205	-0.266149	2.38463e-283	-0.145065	1.89292e-83	-0.278144	1.4127231648022e-311	-0.338382	0	-0.21215	4.16316e-179	-0.304124	0	-0.375148	0	-0.249923	5.27646e-250	-0.192577	4.39198e-127	-0.209436	3.72076e-160	-0.0651122	1.04834e-16	-0.2319	1.92426e-185	-0.263156	8.36286e-256	-0.099404	5.31652e-37	-0.248721	6.65499e-214	-0.28914	1.00750431232118e-310	-0.122817	1.06507e-55
Cervix_Ectocervix	-0.216465	1.26609e-181	-0.221869	6.21612e-191	-0.0450467	3.37043e-09	-0.283152	1.97626258336499e-323	-0.317947	0	-0.138221	3.68356e-76	-0.312348	0	-0.364194	0	-0.197514	4.8193e-155	-0.192423	1.85375e-124	-0.161392	2.9404e-93	0.0221046	0.00531027	-0.247266	2.3627e-211	-0.234481	5.08801e-202	-0.024895	0.00149676	-0.26605	1.37067e-245	-0.269924	1.5682e-269	-0.0647339	1.40773e-16
Cervix_Endocervix	-0.170968	1.79361e-112	-0.161849	7.65393e-101	-0.00772697	0.311977	-0.26956	4.79539e-292	-0.301197	0	-0.130138	1.18843e-67	-0.311895	0	-0.366067	0	-0.203756	4.4641e-165	-0.144949	1.17483e-70	-0.111541	4.87025e-45	0.0263046	0.00092883	-0.22899	9.60969e-181	-0.216593	5.85308e-172	-0.0277063	0.000409295	-0.258513	1.64476e-231	-0.26524	5.47368e-260	-0.0724247	2.27989e-20
Colon_Sigmoid	-0.222701	2.85597e-196	-0.227432	7.79514e-205	-0.0435424	7.79653e-09	-0.303673	0	-0.342944	0	-0.15723	2.90055e-98	-0.334095	0	-0.394146	0	-0.223733	1.74637e-199	-0.195435	1.41368e-130	-0.155973	1.30611e-88	0.0194628	0.0133139	-0.255234	1.57621e-225	-0.244237	1.55316e-219	-0.039904	3.56321e-07	-0.27261	3.16837e-258	-0.284447	2.34475e-300	-0.0834577	1.53546e-26
Colon_Transverse	-0.193031	2.20888e-147	-0.201224	3.01492e-160	-0.0392915	1.83821e-07	-0.259475	5.31923e-270	-0.291315	0	-0.121705	2.45253e-59	-0.294418	0	-0.344944	0	-0.186424	4.83137e-138	-0.181047	3.16225e-112	-0.146474	2.0772e-78	0.0211178	0.00717854	-0.23183	2.50278e-185	-0.21711	8.62176e-173	-0.0246659	0.00165472	-0.255176	2.01368e-225	-0.260502	1.5665e-250	-0.0671831	9.70018e-18
Esophagus_Gastroesophageal_Junction	-0.24783	6.85238e-244	-0.255781	3.38994e-260	-0.0623797	1.32235e-16	-0.310189	0	-0.350998	0	-0.164355	2.58239e-107	-0.330587	0	-0.390044	0	-0.221987	2.45934e-196	-0.211858	1.35219e-153	-0.175682	2.91623e-112	0.0171066	0.0295932	-0.259583	1.75896e-233	-0.250258	9.6035e-231	-0.03894	6.77035e-07	-0.269731	1.23015e-252	-0.281802	1.33254e-294	-0.080726	6.23892e-25
Esophagus_Mucosa	-0.181286	4.83445e-130	-0.181867	7.0627e-131	-0.0231766	0.00209394	-0.249396	6.32188e-249	-0.27968	3.79645240823139e-315	-0.120328	4.94345e-58	-0.284812	0	-0.333962	0	-0.183596	7.097e-134	-0.183062	8.66132e-115	-0.146645	1.19989e-78	0.0267839	0.0006466	-0.232643	1.18669e-186	-0.219654	6.44633e-177	-0.026347	0.000777794	-0.252327	2.68556e-220	-0.258688	5.8385e-247	-0.0653875	6.96067e-17
Esophagus_Muscularis	-0.245697	1.37132e-240	-0.252076	1.49435e-253	-0.0574004	2.42621e-14	-0.309642	0	-0.349782	0	-0.161529	1.12835e-103	-0.330747	0	-0.39025	0	-0.221418	2.5716e-195	-0.206221	7.72151e-146	-0.167483	2.43468e-102	0.0254006	0.00121625	-0.256797	2.27984e-228	-0.247006	1.18732e-224	-0.0367796	2.70498e-06	-0.269582	2.3817e-252	-0.281866	9.68031e-295	-0.080792	5.71332e-25
Fallopian_Tube	-0.126999	1.47184e-62	-0.110736	6.64148e-48	0.029531	0.000110293	-0.236769	7.51118e-224	-0.263918	1.35852e-279	-0.106659	6.53381e-46	-0.299426	0	-0.351264	0	-0.194985	4.49833e-151	-0.104252	3.01981e-37	-0.0729645	3.60399e-20	0.0356932	6.93777e-06	-0.197181	1.30482e-133	-0.188006	2.68791e-129	-0.0230335	0.00330528	-0.247056	5.48801e-211	-0.256035	8.6098e-242	-0.0709572	1.29876e-19
Heart_Atrial_Appendage	-0.229982	1.79435e-209	-0.24578	7.07781e-240	-0.0726794	5.28479e-22	-0.293849	0	-0.336049	0	-0.15996	1.1088e-101	-0.321415	0	-0.377724	0	-0.208381	9.90638e-173	-0.205271	3.30914e-144	-0.179993	7.10273e-118	0.00413404	0.599029	-0.247387	1.45232e-211	-0.24389	6.74144e-219	-0.0436622	2.53526e-08	-0.261737	1.77664e-237	-0.272416	1.09164e-274	-0.074109	2.96326e-21
Heart_Left_Ventricle	-0.248112	1.18354e-244	-0.270927	4.03299e-293	-0.105209	2.02251e-44	-0.2965	0	-0.340741	0	-0.170784	7.63503e-116	-0.315291	0	-0.371284	0	-0.20719	9.6396e-171	-0.210508	1.12784e-151	-0.199134	2.21497e-144	-0.0239017	0.00236108	-0.247722	3.76809e-212	-0.249551	2.05762e-229	-0.0548863	2.47266e-12	-0.257638	6.62846e-230	-0.270099	6.82812e-270	-0.0765182	1.47642e-22
Kidney_Cortex	-0.195045	1.43671e-148	-0.200759	1.83643e-157	-0.0420554	2.92476e-08	-0.257578	5.81682e-266	-0.289183	0	-0.124825	2.3988e-62	-0.2854	0	-0.331015	0	-0.173539	1.32602e-119	-0.173816	1.79718e-102	-0.137997	4.67342e-69	0.0255477	0.00120973	-0.224753	5.10105e-174	-0.207047	5.5014e-157	-0.0165298	0.0350171	-0.242308	8.65558e-203	-0.24147	1.74449e-214	-0.0521793	2.75933e-11
Liver	-0.151134	3.60788e-90	-0.153739	2.833e-93	-0.0225716	0.00278715	-0.206039	7.84441e-169	-0.236248	7.56533e-223	-0.111699	3.29864e-50	-0.231015	6.61479e-213	-0.27848	2.35090683283818e-312	-0.166997	8.87991e-111	-0.154089	2.62176e-81	-0.129565	1.76344e-61	0.0141939	0.0710962	-0.194296	1.03112e-129	-0.190828	3.2173e-133	-0.032116	4.18972e-05	-0.2097	3.02874e-151	-0.222211	4.07723e-181	-0.0658853	4.05173e-17
Lung	-0.137242	8.55316e-75	-0.137442	5.21189e-75	-0.00404689	0.591259	-0.222168	1.162e-196	-0.250786	8.90659e-252	-0.106481	9.19774e-46	-0.271032	2.40921e-295	-0.319058	0	-0.176116	3.52003e-123	-0.142428	8.71876e-70	-0.112793	4.65921e-47	0.0199283	0.0111611	-0.206655	7.571e-147	-0.197061	4.18587e-142	-0.0293546	0.000180857	-0.238505	2.36568e-196	-0.246132	4.9736e-223	-0.0663345	2.47787e-17
Minor_Salivary_Gland	-0.200411	1.13752e-157	-0.190911	5.40372e-143	-0.0213622	0.00475765	-0.259671	2.02108e-270	-0.282469	1.08694442085074e-321	-0.114627	8.50481e-53	-0.288958	0	-0.335137	0	-0.178662	9.09189e-127	-0.180226	1.62706e-110	-0.135231	1.36858e-66	0.0411269	1.78234e-07	-0.234144	4.13228e-189	-0.213134	1.89678e-166	-0.0110274	0.159619	-0.255855	1.17844e-226	-0.25709	7.71554e-244	-0.0570757	3.22352e-13
Muscle_Skeletal	-0.266898	3.88567e-285	-0.299542	0	-0.138436	3.93397e-76	-0.304397	0	-0.3603	0	-0.205284	1.38626e-167	-0.318295	0	-0.385448	0	-0.23964	2.00904e-229	-0.215602	1.59424e-159	-0.213953	3.03321e-167	-0.0398334	3.89022e-07	-0.24514	1.17403e-207	-0.260448	2.00612e-250	-0.0764701	1.56909e-22	-0.253912	3.85354e-223	-0.279764	3.27382e-290	-0.0993703	5.61853e-37
Nerve_Tibial	-0.22951	2.7082e-209	-0.229143	1.29985e-208	-0.0403534	8.42092e-08	-0.293887	0	-0.332408	0	-0.155036	1.46179e-95	-0.316855	0	-0.375782	0	-0.219409	9.74114e-192	-0.199428	2.71172e-136	-0.156658	1.32317e-89	0.0306862	9.30072e-05	-0.248012	1.16569e-212	-0.236187	5.02633e-205	-0.0323359	3.71014e-05	-0.261535	4.22728e-237	-0.271229	3.16898e-272	-0.0740797	3.07146e-21
Ovary	-0.225633	1.37618e-201	-0.235482	6.6874e-220	-0.0556031	1.64795e-13	-0.287978	0	-0.33151	0	-0.164813	6.53256e-108	-0.305707	0	-0.367657	0	-0.223801	1.31611e-199	-0.192592	7.41531e-127	-0.168217	5.06169e-103	0.009929	0.206566	-0.237348	2.04342e-194	-0.240176	3.80237e-212	-0.0486832	5.22545e-10	-0.2477	4.11928e-212	-0.268739	4.23159e-267	-0.0877596	3.50141e-29
Pancreas	-0.209183	3.58497e-173	-0.210669	1.14274e-175	-0.0340922	6.10243e-06	-0.261578	1.60944e-274	-0.29438	0	-0.128931	1.99445e-66	-0.284846	0	-0.334872	0	-0.18329	1.98599e-133	-0.191069	5.25429e-125	-0.156685	1.39477e-89	0.0188974	0.0161441	-0.23134	1.56311e-184	-0.220602	1.81708e-178	-0.0331067	2.40856e-05	-0.243603	5.2352e-205	-0.250646	1.77019e-231	-0.0689551	1.31768e-18
Pituitary	-0.254107	1.81377e-256	-0.25012	2.74009e-248	-0.0143977	0.0565923	-0.322486	0	-0.353059	0	-0.130604	3.96768e-68	-0.341775	0	-0.393635	0	-0.199885	8.1611e-159	-0.200676	1.30138e-137	-0.150892	6.20572e-83	0.0559212	1.12324e-12	-0.253687	9.76893e-223	-0.233803	7.84442e-201	-0.0110154	0.160076	-0.265127	7.68328e-244	-0.269749	3.58333e-269	-0.0619244	2.68558e-15
Prostate	-0.203372	1.16504e-163	-0.195412	5.18918e-151	0.00037113	0.960735	-0.282921	9.88131291682493e-323	-0.30787	0	-0.108405	2.23757e-47	-0.313761	0	-0.361009	0	-0.181719	3.79795e-131	-0.174923	9.47976e-105	-0.121121	5.2871e-54	0.0606693	1.0844e-14	-0.237904	2.41018e-195	-0.211351	1.20515e-163	-0.00302604	0.699565	-0.258017	1.3423e-230	-0.256868	2.078e-243	-0.0539699	5.66936e-12
Skin_Not_Sun_Exposed_Suprapubic	-0.201904	2.23381e-161	-0.187539	4.12194e-139	-0.0158905	0.0349762	-0.274142	2.20086e-302	-0.289698	0	-0.11259	5.47164e-51	-0.30432	0	-0.341431	0	-0.173444	1.78928e-119	-0.18467	8.904e-117	-0.144128	5.76881e-76	0.0314036	6.36599e-05	-0.239072	2.639e-197	-0.217575	1.53532e-173	-0.012152	0.121194	-0.25778	3.64237e-230	-0.253213	2.32355e-236	-0.0474496	1.40785e-09
Skin_Sun_Exposed_Lower_leg	-0.196795	2.19512e-153	-0.182843	2.51854e-132	-0.0167424	0.0262397	-0.276639	4.20878e-308	-0.29344	0	-0.116768	9.85971e-55	-0.307096	0	-0.346417	0	-0.177226	9.76027e-125	-0.180162	3.11112e-111	-0.139768	1.50147e-71	0.0309252	8.17926e-05	-0.239432	6.53826e-198	-0.21828	1.11009e-174	-0.0130101	0.0970708	-0.25967	1.21484e-233	-0.254996	8.75907e-240	-0.0467555	2.43268e-09
Small_Intestine_Terminal_Ileum	-0.153098	2.01406e-92	-0.15648	1.62599e-96	-0.0207049	0.00611259	-0.22329	1.10795e-198	-0.251778	8.02844e-254	-0.107078	2.92388e-46	-0.263005	1.31414e-277	-0.30998	0	-0.170949	4.56816e-116	-0.156038	2.8661e-83	-0.120093	5.64395e-53	0.0319339	4.90795e-05	-0.21325	1.8425e-156	-0.195199	2.03411e-139	-0.015118	0.0538452	-0.239527	4.52851e-198	-0.240556	7.84627e-213	-0.0577851	1.63838e-13
Spleen	-0.15455	2.04788e-94	-0.147011	1.63193e-85	0.00474465	0.529317	-0.216825	3.45353e-187	-0.241832	9.92997e-234	-0.096677	5.4062e-38	-0.246604	2.95209e-243	-0.289596	0	-0.156306	4.0356e-97	-0.145145	2.58023e-72	-0.109989	9.49388e-45	0.0321011	4.40969e-05	-0.199581	6.68232e-137	-0.188332	9.5643e-130	-0.023217	0.00306415	-0.221312	1.16553e-168	-0.226952	4.78645e-189	-0.0592742	3.85506e-14
Stomach	-0.207915	3.49659e-171	-0.216308	1.88835e-185	-0.0457458	1.25953e-09	-0.271747	5.90671e-297	-0.303345	0	-0.126734	3.15903e-64	-0.302166	0	-0.350973	0	-0.186471	4.10907e-138	-0.191445	1.81511e-125	-0.154573	3.40334e-87	0.0258852	0.000983317	-0.240546	8.58854e-200	-0.223525	2.69938e-183	-0.0219937	0.00502923	-0.25856	1.34732e-231	-0.260635	8.57288e-251	-0.0625419	1.42028e-15
Testis	-0.0795501	3.49336e-26	-0.0741522	5.91497e-23	0.00990333	0.188273	-0.150425	5.19533e-90	-0.178391	2.20493e-126	-0.0921406	1.18065e-34	-0.193389	1.35253e-148	-0.242772	1.37046e-235	-0.161857	4.29463e-104	-0.0757032	8.22523e-21	-0.0508346	9.08396e-11	0.0200912	0.0104596	-0.122818	2.27733e-52	-0.12662	4.08801e-59	-0.0374109	1.81846e-06	-0.149329	8.16251e-77	-0.173865	1.40972e-110	-0.0793766	3.71717e-24
Thyroid	-0.178946	9.55727e-127	-0.173693	2.04155e-119	-0.00405738	0.59015	-0.262362	3.25263e-276	-0.294457	0	-0.126837	2.49744e-64	-0.295881	0	-0.349122	0	-0.197515	4.81556e-155	-0.159233	5.07897e-87	-0.119015	2.93124e-52	0.0381267	1.18744e-06	-0.22123	1.55654e-168	-0.211844	2.03806e-164	-0.0295523	0.000163524	-0.243238	2.21402e-204	-0.255297	2.30199e-240	-0.0738617	4.00984e-21
Uterus	-0.246655	7.87739e-242	-0.260412	2.66741e-270	-0.0696865	2.2778e-20	-0.302132	0	-0.345665	0	-0.167301	3.51412e-111	-0.318294	0	-0.379556	0	-0.223268	1.21485e-198	-0.205596	1.09442e-144	-0.17423	1.64098e-110	0.0147622	0.0603638	-0.248668	8.22921e-214	-0.243977	4.66586e-219	-0.0433977	3.07605e-08	-0.26017	1.44937e-234	-0.275265	1.19087e-280	-0.0845671	3.29282e-27
Vagina	-0.230433	1.43151e-210	-0.229164	3.22546e-208	-0.0323393	1.79743e-05	-0.289707	0	-0.319943	0	-0.128697	3.43905e-66	-0.311576	0	-0.36266	0	-0.194941	5.27066e-151	-0.201809	2.2309e-139	-0.154997	1.35318e-87	0.0466295	2.92558e-09	-0.251323	1.6562e-218	-0.2325	1.46663e-198	-0.0148236	0.0586863	-0.267902	4.03473e-249	-0.271187	3.86922e-272	-0.0627526	1.14117e-15
Whole_Blood	-0.16902	4.71886e-113	-0.18787	1.10416e-139	-0.078234	2.48664e-25	-0.206045	7.66703e-169	-0.241224	1.56993e-232	-0.126117	1.29068e-63	-0.224016	5.38364e-200	-0.267463	2.20204e-287	-0.153112	3.17723e-93	-0.158459	3.90923e-86	-0.156137	5.14267e-89	-0.0318966	4.8575e-05	-0.187656	5.62427e-121	-0.194266	4.40189e-138	-0.0525697	1.96268e-11	-0.199478	9.28762e-137	-0.211906	1.62575e-164	-0.0649501	1.11607e-16
