# Supplementary material for: The regulatory genome constrains protein sequence evolution: implications for the search for disease-associated genes
Source: PeerJ. 2020 Jul 21;8:e9554. doi: 10.7717/peerj.9554 (PMC7380284; doi:10.7717/peerj.9554)
Supplement: Supplemental Information 4 [file peerj-08-9554-s004.xlsx]

## Sheet: SupplementaryTable3_data
EnsemblID	GeneID	GeneName	Chr	Start	Stop	Exons	mRNA_Length	GeneLength	Type	tau	MaxMeanRPKM	MaxVarianceRPKM	Chimp_dN	Chimp_dS	Chimp_dN.dS	Mouse_dN	Mouse_dS	Mouse_dN.dS	Branch	GTEx_Muscle_h2	DGN_WholeBlood_h2	NumberOfInteractions	Error_Free_Folding	ProteinID	Mendelian	Essential	ImmuneResponse	AdaptiveImmuneResponse	Olfactory	LOF_tolerant
ENSG00000186092.4	ENSG00000186092	OR4F5	1	69091	70008	1	917	917	protein_coding	0.88806	0.00235701	0.000173569	0.0097	0.0098	0.989796	0.1282	0.5359	0.239224	5	NA	NA	NA	4.86e-07	NA	0	0	0	0	1	0
ENSG00000237683.5	ENSG00000237683	AL627309.1	1	134901	139379	2	2659	4478	protein_coding	0.952772	146.181	9855.21	NA	NA	NA	NA	NA	NA	NA	0	NA	NA	0.0224932	NA	0	0	0	0	0	0
ENSG00000235249.1	ENSG00000235249	OR4F29	1	367640	368634	1	994	994	protein_coding	0.979809	0.000350609	1.02e-05	NA	NA	NA	0.1512	0.8497	0.177945	NA	NA	NA	NA	7.14e-08	NA	0	0	0	0	0	0
ENSG00000185097.2	ENSG00000185097	OR4F16	1	621059	622053	1	994	994	protein_coding	0.935579	0.000308113	8.13e-06	NA	NA	NA	0.1627	1.091	0.149129	11	NA	NA	NA	6.26e-08	NA	0	0	0	0	1	0
ENSG00000269831.1	ENSG00000269831	AL669831.1	1	738532	739137	3	126	605	protein_coding	0.784111	0.0968893	0.0170606	NA	NA	NA	NA	NA	NA	NA	NA	NA	NA	2.28e-05	NA	0	0	0	0	0	0
ENSG00000269308.1	ENSG00000269308	AL645608.2	1	818043	819983	3	54	1940	protein_coding	NA	0	0	NA	NA	NA	NA	NA	NA	NA	NA	NA	NA	0	NA	0	0	0	0	0	0
ENSG00000187634.6	ENSG00000187634	SAMD11	1	860260	879955	14	2537	19695	protein_coding	0.842612	16.5964	74.3159	0.0078	0.0297	0.262626	0.1602	0.8902	0.17996	0	0	NA	NA	0.00260999	NA	0	0	0	0	0	0
ENSG00000268179.1	ENSG00000268179	AL645608.1	1	861264	866445	6	330	5181	protein_coding	NA	0	0	NA	NA	NA	NA	NA	NA	NA	NA	NA	NA	0	NA	0	0	0	0	0	0
ENSG00000188976.6	ENSG00000188976	NOC2L	1	879584	894689	17	4184	15105	protein_coding	0.441767	44.8733	155.524	0.0048	0.0306	0.156863	0.1481	1.1882	0.124642	0	0	0.24	557	0.00536456	ENSP00000317992	0	0	0	0	0	0
ENSG00000187961.9	ENSG00000187961	KLHL17	1	895967	901095	12	2548	5128	protein_coding	0.612905	13.4495	13.2994	0.0006	0.0471	0.0127389	0.0091	1.0525	0.00864608	0	0.013	0.088	91	0.002103	ENSP00000343930	0	0	0	0	0	0
ENSG00000187583.6	ENSG00000187583	PLEKHN1	1	901877	911245	15	2440	9368	protein_coding	0.904915	32.5814	267.439	0.01	0.0223	0.44843	0.2035	0.9164	0.222065	2	NA	NA	NA	0.00520921	NA	0	0	0	0	0	0
ENSG00000187642.5	ENSG00000187642	C1orf170	1	910579	917497	5	3059	6918	protein_coding	0.974521	66.4149	2200.74	0.0464	0.0578	0.802768	0.5171	0.9081	0.569431	2	0	0.264	NA	0.00956987	NA	0	0	0	0	0	0
ENSG00000188290.6	ENSG00000188290	HES4	1	934342	935552	3	1037	1210	protein_coding	0.691529	29.1672	387.841	0.0018	0.0372	0.0483871	NA	NA	NA	0	0	0.268	NA	0.00589542	NA	0	0	0	0	0	0
ENSG00000187608.5	ENSG00000187608	ISG15	1	948803	949920	2	709	1117	protein_coding	0.938267	337.047	81375.2	0.0074	0	NA	0.2196	1.3871	0.158316	2	0	0	507	0.0718636	ENSP00000368699	0	0	1	0	0	0
ENSG00000188157.9	ENSG00000188157	AGRN	1	955503	991496	36	7287	35993	protein_coding	0.744994	49.7249	539.517	0.0042	0.0323	0.130031	0.1058	0.9512	0.111228	0	0	0.009	NA	0.00353985	NA	0	1	0	0	0	0
ENSG00000237330.2	ENSG00000237330	RNF223	1	1006346	1009687	2	1900	3341	protein_coding	0.943066	15.7348	328.015	NA	NA	NA	NA	NA	NA	NA	0.003	NA	NA	0.00274505	NA	0	0	0	0	0	0
ENSG00000131591.13	ENSG00000131591	C1orf159	1	1017198	1051741	3	3312	34543	protein_coding	0.798813	18.7245	26.9402	NA	NA	NA	0.1738	1.0216	0.170125	0	0	0.097	NA	0.00258382	NA	0	0	0	0	0	0
ENSG00000162571.9	ENSG00000162571	TTLL10	1	1109264	1133315	16	2267	24051	protein_coding	0.98851	30.6191	90.2477	0.0198	0.0272	0.727941	0.2147	1.2585	0.1706	0	0	0.083	31	0.0050327	ENSP00000368591	0	0	0	0	0	0
ENSG00000186891.9	ENSG00000186891	TNFRSF18	1	1138888	1142071	5	1174	3183	protein_coding	0.855984	15.9462	378.026	0.5356	0.9384	0.570759	0.6843	5.2021	0.131543	5	0	0.253	1	0.00313769	ENSP00000328207	0	0	1	0	0	0
ENSG00000186827.6	ENSG00000186827	TNFRSF4	1	1146706	1149518	5	1702	2812	protein_coding	0.836709	12.7153	44.6086	NA	NA	NA	0.2534	1.415	0.179081	5	0	0.099	10	0.00229503	ENSP00000368538	0	0	1	0	0	0
ENSG00000078808.12	ENSG00000078808	SDF4	1	1152288	1167411	3	3513	15123	protein_coding	0.392735	97.9164	615.213	NA	NA	NA	0.0757	1.7866	0.042371	0	0	0.074	11	0.0130813	ENSP00000353094	0	0	0	0	0	0
ENSG00000176022.3	ENSG00000176022	B3GALT6	1	1167629	1170421	1	2792	2792	protein_coding	0.480623	11.9299	11.8447	0.0046	0.0363	0.126722	0.0933	2.0411	0.0457106	0	0.049	0.327	NA	0.00179315	NA	0	0	0	0	0	0
ENSG00000184163.3	ENSG00000184163	FAM132A	1	1177826	1182102	8	1028	4276	protein_coding	0.866679	8.92187	45.9877	NA	NA	NA	0.1911	1.1541	0.165584	0	0	0.002	NA	0.00180363	NA	0	0	0	0	0	0
ENSG00000160087.16	ENSG00000160087	UBE2J2	1	1189289	1209265	8	2447	19976	protein_coding	0.751969	43.925	74.5379	NA	NA	NA	0.0297	0.6023	0.049311	0	0	0.067	10	0.00700667	ENSP00000383719	0	0	0	0	0	0
ENSG00000162572.15	ENSG00000162572	SCNN1D	1	1215816	1227409	15	3460	11593	protein_coding	0.865412	27.3539	36.8361	0.0238	0.1233	0.193025	NA	NA	NA	2	0.035	0.066	NA	0.00369365	NA	0	0	0	0	0	0
ENSG00000131584.14	ENSG00000131584	ACAP3	1	1227756	1244989	22	5297	17233	protein_coding	0.690296	78.9793	3874.31	0.0062	0.0163	0.380368	0.0285	0.9576	0.0297619	0	0.031	0.003	7	0.0078403	ENSP00000346733	0	0	0	0	0	0
ENSG00000169972.7	ENSG00000169972	PUSL1	1	1243947	1247057	4	1779	3110	protein_coding	0.453321	12.7443	10.4445	0.004	0.0293	0.136519	0.108	0.939	0.115016	5	0.016	0.11	97	0.00226576	ENSP00000368318	0	0	0	0	0	0
ENSG00000127054.14	ENSG00000127054	CPSF3L	1	1246965	1260071	6	3073	13106	protein_coding	0.494217	51.1405	299.689	NA	NA	NA	0.0224	1.1274	0.0198687	0	0.018	0.057	105	0.0073476	ENSP00000413493	0	0	0	0	0	0
ENSG00000224051.2	ENSG00000224051	GLTPD1	1	1260136	1264277	3	2187	4141	protein_coding	0.776096	57.0838	226.564	0	0.0633	0	0.1211	1.184	0.10228	NA	0	0.168	6	0.00951716	ENSP00000343890	0	0	0	0	0	0
ENSG00000169962.4	ENSG00000169962	TAS1R3	1	1266694	1270686	6	3427	3992	protein_coding	0.868413	2.40173	5.83702	0.0048	0.0384	0.125	0.187	1.5549	0.120265	0	0	0.149	NA	0.000325316	NA	0	0	0	0	0	0
ENSG00000107404.13	ENSG00000107404	DVL1	1	1270656	1284730	15	3224	14074	protein_coding	0.604132	69.2094	283.6	0.0007	0.0485	0.014433	0.0242	0.9614	0.0251716	0	0	0.002	141	0.00970282	ENSP00000368169	0	0	0	0	0	0
ENSG00000162576.12	ENSG00000162576	MXRA8	1	1288069	1297157	10	2718	9088	protein_coding	0.69023	155.537	3557.56	NA	NA	NA	0.1211	1.3902	0.0871098	0	NA	NA	7	0.0237986	ENSP00000307887	0	0	0	0	0	0
ENSG00000175756.9	ENSG00000175756	AURKAIP1	1	1309110	1310875	3	1069	1765	protein_coding	0.785849	171.221	1758.15	0.0043	0.0079	0.544304	0.2133	1.0439	0.20433	0	0	0	28	0.0343409	ENSP00000319778	0	0	0	0	0	0
ENSG00000221978.7	ENSG00000221978	CCNL2	1	1321091	1334708	13	4439	13617	protein_coding	0.445289	133.965	1517.68	0.0052	0.0153	0.339869	0.0486	0.6683	0.0727218	1	0	0.002	41	0.0153437	ENSP00000383611	0	0	0	0	0	0
ENSG00000224870.3	ENSG00000224870	RP4-758J18.2	1	1334902	1337426	1	2227	2524	protein_coding	0.434947	5.10114	3.40736	NA	NA	NA	NA	NA	NA	NA	0.013	NA	NA	0.000844395	NA	0	0	0	0	0	0
ENSG00000242485.1	ENSG00000242485	MRPL20	1	1337288	1342693	3	1690	5405	protein_coding	0.279729	34.2702	135.342	0	0	NA	0.078	0.7602	0.102605	NA	0	0.095	340	0.00621081	ENSP00000341082	0	0	0	0	0	0
ENSG00000235098.4	ENSG00000235098	ANKRD65	1	1353800	1357149	4	2010	3349	protein_coding	0.768571	15.016	80.1711	NA	NA	NA	NA	NA	NA	NA	0	NA	776	0.002575	ENSP00000445688	0	0	0	0	0	0
ENSG00000205116.3	ENSG00000205116	TMEM88B	1	1361508	1363167	2	490	1659	protein_coding	0.953327	3.80059	404.446	NA	NA	NA	0.1728	1.1695	0.147755	5	0	NA	NA	0.000840463	NA	0	0	0	0	0	0
ENSG00000179403.10	ENSG00000179403	VWA1	1	1370241	1378262	3	4508	8021	protein_coding	0.805894	71.4546	822.789	NA	NA	NA	0.1262	0.8886	0.142021	0	0.022	NA	18	0.00809349	ENSP00000417185	0	0	0	0	0	0
ENSG00000215915.5	ENSG00000215915	ATAD3C	1	1385069	1405538	12	3847	20469	protein_coding	0.675695	3.89763	6.7857	0.021	0.0513	0.409357	0.0925	1.1303	0.0818367	10	0	0.024	119	0.000492891	ENSP00000368062	0	0	0	0	0	0
ENSG00000160072.15	ENSG00000160072	ATAD3B	1	1407143	1433228	14	4300	26085	protein_coding	0.478808	22.1593	41.0687	0.0224	0.0658	0.340426	0.0745	1.2446	0.0598586	10	NA	NA	173	0.00260161	ENSP00000311766	0	0	0	0	0	0
ENSG00000197785.9	ENSG00000197785	ATAD3A	1	1447531	1470067	16	2596	22536	protein_coding	0.473383	19.4493	76.7527	NA	NA	NA	0.0468	1.2715	0.0368069	0	0	0.057	158	0.00302038	ENSP00000368030	0	0	0	0	0	0
ENSG00000205090.4	ENSG00000205090	TMEM240	1	1470554	1475833	4	714	5279	protein_coding	0.841154	22.2936	103.618	NA	NA	NA	0.0092	0.6984	0.013173	5	0	NA	NA	0.00475141	NA	0	0	0	0	0	0
ENSG00000160075.10	ENSG00000160075	SSU72	1	1477053	1510249	2	2677	33196	protein_coding	0.320397	40.2898	109.166	0	0.0056	0	0.0047	0.5341	0.00879985	0	0	0.208	5	0.00619014	ENSP00000291386	0	0	0	0	0	0
ENSG00000215014.3	ENSG00000215014	AL645728.1	1	1510355	1511373	1	1018	1018	protein_coding	0.924457	3.87454	0.94266	NA	NA	NA	NA	NA	NA	NA	0	NA	NA	0.000783824	NA	0	0	0	0	0	0
ENSG00000228594.1	ENSG00000228594	C1orf233	1	1533392	1535476	1	2084	2084	protein_coding	0.86528	17.8804	67.596	0.0206	0.2016	0.102183	0.0772	1.0043	0.0768695	NA	0	NA	NA	0.00303516	NA	0	0	0	0	0	0
ENSG00000197530.8	ENSG00000197530	MIB2	1	1550795	1565990	19	4228	15195	protein_coding	0.616716	39.2602	76.8599	NA	NA	NA	0.0377	1.0822	0.0348364	0	0	0	49	0.00466116	ENSP00000426103	0	0	0	0	0	0
ENSG00000189409.8	ENSG00000189409	MMP23B	1	1567474	1570639	6	1525	3165	protein_coding	0.806288	6.16042	27.0059	0	0.0537	0	0.0791	1.6725	0.0472945	0	0	0	2	0.00114652	ENSP00000348308	0	0	0	0	0	0
ENSG00000248333.3	ENSG00000248333	CDK11B	1	1570603	1590473	15	2363	19870	protein_coding	0.549764	32.4289	50.5201	NA	NA	NA	0.0689	1.2286	0.0560801	NA	0.016	NA	91	0.00524413	ENSP00000464036	0	1	0	0	0	0
ENSG00000189339.7	ENSG00000189339	SLC35E2B	1	1592939	1624167	10	6251	31228	protein_coding	0.501275	22.8892	64.6031	0.0011	0.0449	0.0244989	0.0731	1.1154	0.065537	0	0.021	0.105	41	0.00193852	ENSP00000234800	0	0	0	0	0	0
ENSG00000008128.18	ENSG00000008128	CDK11A	1	1634169	1655766	19	2634	21597	protein_coding	0.520404	33.3631	88.0767	NA	NA	NA	0.0188	0.9608	0.019567	10	0	0.027	104	0.00516719	ENSP00000384442	0	0	0	0	0	0
ENSG00000215790.2	ENSG00000215790	SLC35E2	1	1656277	1677431	7	2071	21154	protein_coding	0.425331	3.7219	1.74011	NA	NA	NA	NA	NA	NA	10	0.026	0.057	37	0.000632139	ENSP00000246421	0	0	0	0	0	0
ENSG00000008130.11	ENSG00000008130	NADK	1	1682671	1711896	14	3649	29225	protein_coding	0.715884	80.6381	2258.75	0.0061	0.0245	0.24898	0.0397	0.9092	0.0436648	0	0.037	0.017	4	0.0105283	ENSP00000340925	0	0	0	0	0	0
ENSG00000078369.13	ENSG00000078369	GNB1	1	1716729	1822495	12	3116	105766	protein_coding	0.611383	195.584	2997.59	NA	NA	NA	0.0006	0.5577	0.00107585	0	0.02	0.009	NA	0.0279813	NA	0	1	0	0	0	0
ENSG00000169885.5	ENSG00000169885	CALML6	1	1846266	1848735	3	1879	2469	protein_coding	0.928439	8.53356	222.381	0.0073	0.0426	0.171362	NA	NA	NA	5	0.004	0.12	76	0.00149665	ENSP00000304643	0	0	0	0	0	0
ENSG00000178821.8	ENSG00000178821	TMEM52	1	1849029	1850712	2	1116	1683	protein_coding	0.94694	55.506	954.433	0.1056	0.1965	0.537405	0.1609	0.6883	0.233764	5	0	NA	NA	0.0110587	NA	0	0	0	0	0	0
ENSG00000142609.13	ENSG00000142609	C1orf222	1	1853396	1935276	18	4692	81880	protein_coding	0.970767	8.99748	64.2195	NA	NA	NA	NA	NA	NA	2	0.005	NA	NA	0.000987985	NA	0	0	0	0	0	0
ENSG00000187730.6	ENSG00000187730	GABRD	1	1950780	1962192	9	1904	11412	protein_coding	0.992995	66.953	4761.72	0	0.0968	0	0.033	1.3574	0.0243112	0	0.016	0.226	NA	0.0117067	NA	0	1	0	0	0	0
ENSG00000067606.11	ENSG00000067606	PRKCZ	1	1981909	2116834	18	2308	134925	protein_coding	0.886999	21.1925	82.4341	NA	NA	NA	0.0199	0.7169	0.0277584	0	0	0.096	NA	0.00346295	NA	0	0	1	1	0	0
ENSG00000162585.12	ENSG00000162585	C1orf86	1	2115903	2144159	2	4476	28256	protein_coding	0.557454	10.032	4.78159	NA	NA	NA	0.351	1.2678	0.276858	NA	0.001	0.478	NA	0.00113801	NA	0	0	0	0	0	0
ENSG00000269554.1	ENSG00000269554	AL590822.2	1	2121237	2123179	1	1942	1942	protein_coding	0.606457	5.92248	2.79875	NA	NA	NA	NA	NA	NA	NA	0	NA	NA	0.00102785	NA	0	0	0	0	0	0
ENSG00000157933.9	ENSG00000157933	SKI	1	2160134	2241558	7	5606	81424	protein_coding	0.561447	52.4438	267.875	0.0012	0.0158	0.0759494	0.032	0.7827	0.0408841	0	0	0.04	2	0.0049393	ENSP00000367797	1	1	0	0	0	0
ENSG00000116151.9	ENSG00000116151	MORN1	1	2252692	2323146	1	3137	70454	protein_coding	0.795783	7.22764	21.319	0.0057	0.0244	0.233607	0.1992	0.6993	0.284856	3	0.064	0.333	50	0.00102856	ENSP00000367792	0	0	0	0	0	0
ENSG00000269753.1	ENSG00000269753	AL589739.1	1	2258581	2259042	1	461	461	protein_coding	0.807708	1.41709	19.6389	NA	NA	NA	NA	NA	NA	NA	0	NA	NA	0.00031559	NA	0	0	0	0	0	0
ENSG00000157916.14	ENSG00000157916	RER1	1	2323267	2336883	7	3037	13616	protein_coding	0.406467	31.6503	51.9126	0.0026	0.0167	0.155689	0.017	0.6022	0.0282298	0	0	0.006	80	0.00458554	ENSP00000302088	0	0	0	0	0	0
ENSG00000157911.5	ENSG00000157911	PEX10	1	2336236	2345236	6	2032	9000	protein_coding	0.661384	11.986	5.98167	0.0064	0.0407	0.157248	0.1056	1.1063	0.0954533	0	0.042	0.012	2	0.00205246	ENSP00000288774	1	0	0	0	0	0
ENSG00000149527.13	ENSG00000149527	PLCH2	1	2357419	2436969	4	6982	79550	protein_coding	0.894024	48.0602	524.915	0.0045	0.0319	0.141066	0.0945	0.9674	0.0976845	0	NA	NA	3	0.00360459	ENSP00000367747	0	0	0	0	0	0
ENSG00000157881.9	ENSG00000157881	PANK4	1	2439972	2458039	19	2630	18067	protein_coding	0.324495	10.1677	7.63444	0.0016	0.0298	0.0536913	0.0394	0.9827	0.0400936	0	0.096	0.087	11	0.00157906	ENSP00000367727	0	0	0	0	0	0
ENSG00000197921.5	ENSG00000197921	HES5	1	2460184	2461684	3	1303	1500	protein_coding	0.856208	3.34041	58.1974	0	0	NA	0.0295	0.8998	0.0327851	0	0	NA	NA	0.000645089	NA	0	0	0	0	0	0
ENSG00000157873.13	ENSG00000157873	TNFRSF14	1	2487078	2496821	5	4250	9743	protein_coding	0.654238	92.4617	1464.01	0.0075	0.0307	0.2443	0.4637	1.1762	0.394236	6	0	0.118	2	0.0109308	ENSP00000347948	0	0	1	0	0	0
ENSG00000157870.10	ENSG00000157870	FAM213B	1	2517930	2522908	7	2758	4978	protein_coding	0.628901	8.01784	12.6909	0.0109	0.051	0.213725	0.0722	0.992	0.0727823	4	0.103	NA	3	0.00121536	ENSP00000394405	0	0	0	0	0	0
ENSG00000142606.11	ENSG00000142606	MMEL1	1	2522078	2564481	24	2878	42403	protein_coding	0.982527	15.757	31.9733	0.0061	0.0424	0.143868	0.1185	1.0829	0.109428	0	0.01	0.192	NA	0.00234693	NA	0	0	0	0	0	0
ENSG00000215912.7	ENSG00000215912	TTC34	1	2567415	2718286	1	3736	150871	protein_coding	0.96099	3.24248	1.13658	0.0102	0.0471	0.216561	0.2081	1.1104	0.18741	0	0.058	NA	NA	0.000417127	NA	0	0	0	0	0	0
ENSG00000169717.5	ENSG00000169717	ACTRT2	1	2938046	2939465	1	1419	1419	protein_coding	0.999888	168.453	3143.41	0.0043	0.0225	0.191111	0.1056	1.4561	0.0725225	2	0	NA	1010	0.0318262	ENSP00000367658	0	0	0	0	0	0
ENSG00000142611.12	ENSG00000142611	PRDM16	1	2985732	3355185	18	8703	369453	protein_coding	0.858713	12.391	14.4794	0.0056	0.0308	0.181818	0.0633	0.7589	0.0834102	0	0	NA	352	0.000697479	ENSP00000270722	0	1	0	0	0	0
ENSG00000130762.10	ENSG00000130762	ARHGEF16	1	3370990	3397677	15	3046	26687	protein_coding	0.795803	21.7672	197.328	0.0223	0.1023	0.217986	0.0973	1.4347	0.0678191	0	0	NA	18	0.00314873	ENSP00000367629	0	0	0	0	0	0
ENSG00000162591.11	ENSG00000162591	MEGF6	1	3406484	3528059	37	5418	121575	protein_coding	0.801952	53.8758	472.43	NA	NA	NA	0.1258	0.9241	0.136132	0	0	0.202	214	0.00524245	ENSP00000348982	0	0	0	0	0	0
ENSG00000158109.10	ENSG00000158109	TPRG1L	1	3541566	3546691	5	2409	5125	protein_coding	0.581018	67.3811	605.997	0.0262	0.0784	0.334184	0.0388	0.7884	0.0492136	0	0	0.156	NA	0.0108258	NA	0	0	0	0	0	0
ENSG00000116213.11	ENSG00000116213	WRAP73	1	3547331	3569325	2	6087	21994	protein_coding	0.456986	17.1377	14.0253	0.0039	0.029	0.134483	0.0618	0.825	0.0749091	0	0	NA	1	0.00148767	ENSP00000270708	0	0	0	0	0	0
ENSG00000078900.10	ENSG00000078900	TP73	1	3569084	3652765	14	5174	83681	protein_coding	0.892051	7.61	20.8849	0.0176	0.0959	0.183525	0.0557	1.0394	0.0535886	0	0	0.022	NA	0.000770896	NA	0	1	0	0	0	0
ENSG00000162592.4	ENSG00000162592	CCDC27	1	3668962	3688209	12	2240	19247	protein_coding	0.999147	22.0247	74.8564	0.0374	0.0411	0.909976	0.3897	1.7635	0.220981	3	0	NA	NA	0.0036346	NA	0	0	0	0	0	0
ENSG00000235169.3	ENSG00000235169	SMIM1	1	3689352	3692546	4	542	3194	protein_coding	0.89499	20.0547	157.631	NA	NA	NA	0.1032	1.282	0.0804992	NA	0	NA	NA	0.00440723	NA	0	0	0	0	0	0
ENSG00000130764.5	ENSG00000130764	LRRC47	1	3696784	3713068	7	2641	16284	protein_coding	0.509528	43.6196	76.6435	0.0038	0.0261	0.145594	0.0651	0.9924	0.0655985	0	0	0.096	501	0.00673733	ENSP00000367498	0	0	0	0	0	0
ENSG00000116198.8	ENSG00000116198	CEP104	1	3728645	3773778	22	6402	45133	protein_coding	0.489976	9.02357	3.21821	0.0056	0.0194	0.28866	0.1144	0.7752	0.147575	0	0	NA	29	0.000744577	ENSP00000367476	0	0	0	0	0	0
ENSG00000169598.11	ENSG00000169598	DFFB	1	3773845	3801993	8	3144	28148	protein_coding	0.580304	6.30884	3.56643	0.0087	0.0238	0.365546	0.112	1.2897	0.0868419	0	0	0.092	NA	0.00089663	NA	0	0	0	0	0	0
ENSG00000198912.6	ENSG00000198912	C1orf174	1	3805689	3816857	3	3496	11168	protein_coding	0.459364	13.9539	5.72854	0.0102	0.0179	0.569832	0.2399	0.7387	0.32476	0	0	0.247	4	0.00187597	ENSP00000355306	0	0	0	0	0	0
ENSG00000196581.6	ENSG00000196581	AJAP1	1	4714792	4852594	6	11660	137802	protein_coding	0.917514	4.68499	5.07698	0.0021	0.0383	0.0548303	0.0989	0.6528	0.151501	0	0	0.143	NA	0.000160793	NA	0	0	0	0	0	0
ENSG00000131697.13	ENSG00000131697	NPHP4	1	5922871	6052533	33	5515	129662	protein_coding	0.73757	11.5461	19.3987	NA	NA	NA	0.13	0.9122	0.142513	0	0	0.276	1	0.00110058	ENSP00000367398	1	0	0	0	0	0
ENSG00000069424.10	ENSG00000069424	KCNAB2	1	6051526	6161253	16	4257	109727	protein_coding	0.913311	68.4023	898.251	NA	NA	NA	0.0649	0.9526	0.0681293	0	0	0.228	55	0.00807344	ENSP00000367323	0	0	0	0	0	0
ENSG00000116254.13	ENSG00000116254	CHD5	1	6161853	6240183	42	9604	78330	protein_coding	0.959069	47.4336	209.991	0.0042	0.0364	0.115385	0.0236	0.9401	0.0251037	0	0	0.087	55	0.00229433	ENSP00000262450	0	0	0	0	0	0
ENSG00000116251.5	ENSG00000116251	RPL22	1	6241329	6269449	3	2276	28120	protein_coding	0.582454	199.313	2556.08	0	0	NA	0.0033	0.9056	0.00364399	0	0	0	378	0.0326799	ENSP00000346088	0	0	0	0	0	0
ENSG00000158286.8	ENSG00000158286	RNF207	1	6265535	6281359	18	3906	15824	protein_coding	0.657234	12.6977	75.4566	0.0055	0.0196	0.280612	0.1013	0.9103	0.111282	0	0	0.489	NA	0.00158935	NA	0	0	0	0	0	0
ENSG00000116237.11	ENSG00000116237	ICMT	1	6281253	6296032	5	4766	14779	protein_coding	0.648747	25.7267	159.79	0.0018	0.0105	0.171429	0.022	0.5065	0.0434353	0	0	0.208	77	0.00278666	ENSP00000343552	0	1	0	0	0	0
ENSG00000173673.7	ENSG00000173673	HES3	1	6304252	6305638	4	693	1386	protein_coding	0.991845	0.211686	0.019328	0.0197	0.0299	0.658863	0.1969	1.1915	0.165254	3	NA	NA	1	4.53e-05	ENSP00000367130	0	0	0	0	0	0
ENSG00000158292.6	ENSG00000158292	GPR153	1	6307406	6321035	6	4076	13629	protein_coding	0.743867	21.2699	280.7	0.0263	0.0733	0.358799	0.0733	1.0231	0.071645	0	0	0.109	NA	0.00259111	NA	0	0	0	0	0	0
ENSG00000097021.15	ENSG00000097021	ACOT7	1	6324329	6454451	9	2420	130122	protein_coding	0.830068	33.4322	274.428	0.0011	0.0224	0.0491071	0.058	0.7753	0.0748098	0	NA	NA	5	0.00535486	ENSP00000367086	0	0	0	0	0	0
ENSG00000069812.7	ENSG00000069812	HES2	1	6472478	6484730	4	4258	12252	protein_coding	0.914445	12.3271	92.1307	0	0	NA	0.1903	0.7991	0.238143	3	0	NA	NA	0.00145156	NA	0	0	0	0	0	0
ENSG00000187017.10	ENSG00000187017	ESPN	1	6484848	6521430	13	3518	36582	protein_coding	0.931027	62.4258	505.045	NA	NA	NA	0.0882	0.8022	0.109948	0	0	0.254	15	0.00833088	ENSP00000367059	0	0	0	0	0	0
ENSG00000215788.5	ENSG00000215788	TNFRSF25	1	6521211	6526255	6	3477	5044	protein_coding	0.835712	55.6608	1802.27	0.0366	0.0838	0.436754	0.3072	0.9605	0.319833	NA	0	0.035	17	0.00748738	ENSP00000367013	0	0	1	0	0	0
ENSG00000171680.16	ENSG00000171680	PLEKHG5	1	6526152	6580121	22	5199	53969	protein_coding	0.8413	54.2737	619.295	0.0284	0.0711	0.399437	0.0971	0.9066	0.107103	0	0	0.378	NA	0.00547773	NA	0	0	0	0	0	0
ENSG00000162408.10	ENSG00000162408	NOL9	1	6581407	6614595	12	6637	33188	protein_coding	0.576998	7.9538	1.78645	0.0069	0.0112	0.616071	0.2867	0.6916	0.414546	0	0	0.111	62	0.000631039	ENSP00000366934	0	0	0	0	0	0
ENSG00000173662.15	ENSG00000173662	TAS1R1	1	6615241	6639817	6	2886	24576	protein_coding	0.973488	4.6807	3.29909	0.006	0.0162	0.37037	0.1569	0.6641	0.23626	0	0	NA	NA	0.000694239	NA	0	0	0	0	0	0
ENSG00000204859.7	ENSG00000204859	ZBTB48	1	6640061	6649340	7	2477	9279	protein_coding	0.638197	31.1403	40.2597	0.0006	0.0123	0.0487805	0.0427	0.6917	0.061732	0	0	0.071	323	0.00493896	ENSP00000366902	0	0	0	0	0	0
ENSG00000162413.12	ENSG00000162413	KLHL21	1	6650784	6674667	3	6442	23883	protein_coding	0.642645	47.0341	657.02	0.0028	0.0537	0.0521415	0.0155	1.2152	0.0127551	0	0	0	19	0.00385394	ENSP00000366886	0	0	0	0	0	0
ENSG00000116273.5	ENSG00000116273	PHF13	1	6673745	6684093	4	3677	10348	protein_coding	0.777766	40.8471	47.3687	0	0.0124	0	0.0312	0.6567	0.0475103	0	0	0.075	NA	0.00530463	NA	0	0	0	0	0	0
ENSG00000041988.11	ENSG00000041988	THAP3	1	6684926	6695646	5	2048	10720	protein_coding	0.335859	9.27855	11.4486	0.0511	0.0945	0.540741	0.1241	0.8496	0.146069	3	0	0.028	NA	0.00158301	NA	0	0	0	0	0	0
ENSG00000007923.11	ENSG00000007923	DNAJC11	1	6694228	6761984	16	3295	67756	protein_coding	0.448955	14.6141	71.1594	0.0107	0.042	0.254762	0.0154	0.5956	0.0258563	0	0	0	108	0.00202304	ENSP00000366800	0	0	0	0	0	0
ENSG00000171735.14	ENSG00000171735	CAMTA1	1	6845384	7829766	23	8421	984382	protein_coding	0.778008	14.0136	22.1053	0.0089	0.0337	0.264095	0.0315	0.4648	0.0677711	0	0	0.097	NA	0.000825381	NA	0	0	0	0	0	0
ENSG00000049245.8	ENSG00000049245	VAMP3	1	7831329	7841492	5	2200	10163	protein_coding	0.423306	63.5851	559.171	0	0	NA	0.0488	0.6636	0.0735383	0	0	0.113	33	0.0105776	ENSP00000054666	0	0	1	0	0	0
ENSG00000049246.10	ENSG00000049246	PER3	1	7844380	7905237	21	6258	60857	protein_coding	0.548351	11.6732	101.307	0.0367	0.0552	0.664855	0.3141	0.8477	0.370532	0	0	0.163	1	0.00098927	ENSP00000355031	0	0	0	0	0	0
ENSG00000049247.9	ENSG00000049247	UTS2	1	7903143	7913572	7	1594	10429	protein_coding	0.885684	0.934532	100.314	0.1958	0.2723	0.71906	0.4888	1.18	0.414237	1	0.087	0.062	NA	0.000172035	NA	0	0	0	0	0	0
ENSG00000049249.4	ENSG00000049249	TNFRSF9	1	7979907	8000926	8	1915	21019	protein_coding	0.945479	1.43044	1.82235	0.0057	0.0086	0.662791	0.3303	0.7417	0.445328	3	0.007	0	NA	0.000249402	NA	0	0	1	0	0	0
ENSG00000116288.8	ENSG00000116288	PARK7	1	8014351	8045565	7	1081	31214	protein_coding	0.415334	137.59	1071.4	0.0027	0.0164	0.164634	0.0493	0.7325	0.0673038	0	0	0.21	321	0.0276583	ENSP00000340278	0	0	0	0	0	0
ENSG00000116285.8	ENSG00000116285	ERRFI1	1	8064464	8086368	4	3100	21904	protein_coding	0.666413	153.55	11813.1	0.0009	0.0035	0.257143	0.0951	0.4385	0.216876	0	0	0.037	1	0.022044	ENSP00000366702	0	1	0	0	0	0
ENSG00000162426.10	ENSG00000162426	SLC45A1	1	8377886	8404227	9	2775	26341	protein_coding	0.718415	9.12513	9.61637	0.0006	0.0408	0.0147059	0.0437	1.0004	0.0436825	0	0	0.054	NA	0.00137966	NA	0	0	0	0	0	0
ENSG00000142599.13	ENSG00000142599	RERE	1	8412457	8877702	24	8002	465245	protein_coding	0.560305	55.3739	402.347	0.0012	0.0142	0.084507	0.027	0.5509	0.0490107	0	0	0.111	37	0.00350245	ENSP00000338629	0	1	0	0	0	0
ENSG00000074800.9	ENSG00000074800	ENO1	1	8921061	8939308	9	2257	18247	protein_coding	0.830434	1474.07	105231	0	0.0203	0	0.0259	0.6498	0.0398584	0	0.043	0.032	831	0.24217	ENSP00000234590	0	1	0	0	0	0
ENSG00000131686.10	ENSG00000131686	CA6	1	9005926	9035151	3	1490	29225	protein_coding	0.980314	10.376	85.2424	0.0267	0.0904	0.295354	0.3414	1.0662	0.320203	0	NA	NA	NA	0.00194701	NA	0	0	0	0	0	0
ENSG00000197241.3	ENSG00000197241	SLC2A7	1	9063359	9086404	12	1527	23045	protein_coding	0.951774	0.281332	0.0233532	0.0009	0.0216	0.0416667	0.1429	0.9163	0.155953	2	NA	NA	76	5.23e-05	ENSP00000383698	0	0	0	0	0	0
ENSG00000142583.13	ENSG00000142583	SLC2A5	1	9095166	9148537	12	4153	53371	protein_coding	0.911704	26.0798	508.671	0.0018	0.0202	0.0891089	0.1011	1.2333	0.0819752	0	0.021	0.062	87	0.00313453	ENSP00000366641	0	0	0	0	0	0
ENSG00000180758.10	ENSG00000180758	GPR157	1	9160364	9189229	4	5261	28865	protein_coding	0.805991	15.2021	31.5431	0.0085	0.0377	0.225464	0.0692	0.9155	0.0755871	0	0	0.04	NA	0.00151759	NA	0	0	0	0	0	0
ENSG00000049239.8	ENSG00000049239	H6PD	1	9294834	9331396	5	9141	36562	protein_coding	0.599897	40.0261	335.488	0.005	0.0259	0.19305	0.088	0.8388	0.104912	0	0	0.487	364	0.0020915	ENSP00000366620	1	0	0	0	0	0
ENSG00000171621.9	ENSG00000171621	SPSB1	1	9352939	9429591	3	3117	76652	protein_coding	0.554808	31.4439	670.678	0.0017	0.0199	0.0854271	0.0067	0.73	0.00917808	0	0.054	0.23	108	0.00448197	ENSP00000330221	0	0	0	0	0	0
ENSG00000171612.6	ENSG00000171612	SLC25A33	1	9599541	9645237	7	3847	45696	protein_coding	0.80522	12.2777	22.4068	0.0016	0.0031	0.516129	0.0531	0.5091	0.104302	0	0	0	1	0.0015545	ENSP00000306328	0	0	0	0	0	0
ENSG00000188807.8	ENSG00000188807	TMEM201	1	9648932	9674935	6	3845	26003	protein_coding	0.692642	9.10399	26.2069	NA	NA	NA	0.0882	0.8337	0.105793	0	0	0.01	20	0.00115046	ENSP00000344503	0	0	0	0	0	0
ENSG00000171608.11	ENSG00000171608	PIK3CD	1	9711790	9789172	24	5459	77382	protein_coding	0.912199	39.1689	419.004	0.0004	0.0252	0.015873	0.0249	0.968	0.0257231	0	0	0	92	0.00378672	ENSP00000366563	0	0	1	1	0	0
ENSG00000179840.5	ENSG00000179840	C1orf200	1	9712668	9714644	2	1821	1976	protein_coding	0.962425	2.22126	4.71101	NA	NA	NA	NA	NA	NA	5	0.016	0	NA	0.000393299	NA	0	0	0	0	0	0
ENSG00000171603.12	ENSG00000171603	CLSTN1	1	9789084	9884584	19	5202	95500	protein_coding	0.725036	83.6834	2113.06	0.0018	0.0258	0.0697674	0.0385	0.8756	0.0439698	0	0.002	0.045	141	0.00843935	ENSP00000366513	0	0	0	0	0	0
ENSG00000178585.10	ENSG00000178585	CTNNBIP1	1	9908334	9970394	6	2994	62060	protein_coding	0.916352	169.411	3024.46	0	0	NA	0.0099	0.4955	0.0199798	0	0	0.089	4	0.0246224	ENSP00000366466	0	1	0	0	0	0
ENSG00000162441.7	ENSG00000162441	LZIC	1	9982173	10003465	8	2273	21292	protein_coding	0.704054	19.6245	13.7317	0	0.0114	0	0.0317	0.6204	0.0510961	0	0.055	0	NA	0.00322033	NA	0	0	0	0	0	0
ENSG00000173614.9	ENSG00000173614	NMNAT1	1	10003486	10045559	5	3776	42073	protein_coding	0.42849	3.92451	3.14453	0.0017	0	NA	0.1151	0.7626	0.150931	0	0	0.018	25	0.000501318	ENSP00000366410	1	0	0	0	0	0
ENSG00000162444.11	ENSG00000162444	RBP7	1	10057264	10076078	5	856	18814	protein_coding	0.896202	159.645	33898.9	0.0913	0.2517	0.362733	0.0508	0.6452	0.0787353	NA	0.016	0.114	1	0.0332933	ENSP00000294435	0	0	0	0	0	0
ENSG00000130939.14	ENSG00000130939	UBE4B	1	10092890	10241297	27	5495	148407	protein_coding	0.311056	14.8233	30.1712	0.0011	0.007	0.157143	0.012	0.4886	0.02456	0	0	0.055	130	0.00142112	ENSP00000343001	0	1	0	0	0	0
ENSG00000054523.12	ENSG00000054523	KIF1B	1	10270863	10441661	49	10620	170798	protein_coding	0.808995	31.2621	114.34	0.3219	0.5104	0.630682	0.014	0.4204	0.0333016	0	0	0.296	46	0.00127897	ENSP00000263934	1	1	0	0	0	0
ENSG00000142657.16	ENSG00000142657	PGD	1	10458649	10480201	13	1946	21552	protein_coding	0.892713	369.406	77923.2	0	0.0233	0	0.0313	0.5972	0.0524113	0	0	0.002	371	0.0640245	ENSP00000270776	0	0	0	0	0	0
ENSG00000241563.2	ENSG00000241563	CORT	1	10509776	10511959	2	1128	2183	protein_coding	0.880772	4.28304	124.022	0.0041	0.0488	0.0840164	0.2938	1.2462	0.235757	NA	0	0.035	NA	0.000851113	NA	0	0	0	0	0	0
ENSG00000160049.7	ENSG00000160049	DFFA	1	10516579	10532583	6	6026	16004	protein_coding	0.498311	10.2851	6.68914	0.0165	0.0034	4.85294	0.1413	0.6249	0.226116	2	0	0.025	7	0.000905238	ENSP00000366237	0	0	0	0	0	0
ENSG00000142655.8	ENSG00000142655	PEX14	1	10532345	10690815	9	1976	158470	protein_coding	0.712066	34.8238	644.138	0	0.0174	0	0.0363	0.525	0.0691429	0	0	0.08	12	0.00600796	ENSP00000349016	1	1	0	0	0	0
ENSG00000130940.10	ENSG00000130940	CASZ1	1	10696661	10856707	21	7915	160046	protein_coding	0.810205	27.802	50.8292	0.0022	0.0267	0.082397	0.0491	0.7592	0.0646733	0	0	0.02	2	0.00178322	ENSP00000366221	0	0	0	0	0	0
ENSG00000175262.10	ENSG00000175262	C1orf127	1	11006528	11042094	13	2748	35566	protein_coding	0.938783	2.61274	6.51378	0.0135	0.0258	0.523256	0.2667	0.6132	0.434932	3	0.015	0.062	NA	0.000396182	NA	0	0	0	0	0	0
ENSG00000120948.11	ENSG00000120948	TARDBP	1	11072414	11085796	6	2742	13382	protein_coding	0.276344	52.103	249.331	0	0.018	0	0.0178	0.4581	0.0388561	0	0	0	54	0.00791638	ENSP00000240185	0	1	0	0	0	0
ENSG00000009724.12	ENSG00000009724	MASP2	1	11086580	11107290	11	2428	20710	protein_coding	0.974645	70.9589	235.176	0.0064	0.0098	0.653061	0.1069	0.5401	0.197926	0	0	0.072	19	0.0113679	ENSP00000383690	0	0	1	1	0	0
ENSG00000116649.5	ENSG00000116649	SRM	1	11114641	11120081	8	1258	5440	protein_coding	0.506912	66.514	727.438	0.0013	0.0471	0.0276008	0.0242	1.1145	0.0217138	0	0.018	0.012	203	0.0129406	ENSP00000366156	0	0	0	0	0	0
ENSG00000171824.9	ENSG00000171824	EXOSC10	1	11126675	11159938	23	3311	33263	protein_coding	0.560701	48.9232	107.947	0.0016	0.0165	0.0969697	0.0731	0.729	0.100274	0	0.03	0.019	398	0.00675775	ENSP00000366135	0	0	0	0	0	0
ENSG00000198793.8	ENSG00000198793	MTOR	1	11166592	11322564	58	8619	155972	protein_coding	0.628332	16.3162	6.05691	0	0.0073	0	0.0051	0.5092	0.0100157	0	0	0.06	209	0.000929777	ENSP00000354558	0	1	0	0	0	0
ENSG00000171819.4	ENSG00000171819	ANGPTL7	1	11249398	11256038	5	2233	6640	protein_coding	0.992368	397.107	29375.6	0.0026	0.016	0.1625	0.0566	0.6272	0.0902423	0	0	NA	3	0.0656646	ENSP00000366015	0	0	0	0	0	0
ENSG00000120942.9	ENSG00000120942	UBIAD1	1	11333263	11356106	2	3644	22843	protein_coding	0.509226	7.22391	11.3322	0.0013	0.0256	0.0507812	0.037	0.471	0.0785563	0	0	0.007	8	0.000943889	ENSP00000366006	1	0	0	0	0	0
ENSG00000204624.6	ENSG00000204624	PTCHD2	1	11539223	11597641	21	5194	58418	protein_coding	0.969437	4.8017	1.96564	0.0022	0.0331	0.0664653	0.0586	0.8987	0.0652053	0	0	0.066	NA	0.000484623	NA	0	0	0	0	0	0
ENSG00000116661.9	ENSG00000116661	FBXO2	1	11708424	11715842	6	1554	7418	protein_coding	0.91754	133.791	4767.06	0.0027	0.017	0.158824	0.0545	0.9391	0.0580343	NA	0	0.768	1	0.0248202	ENSP00000346240	0	0	0	0	0	0
ENSG00000132879.9	ENSG00000132879	FBXO44	1	11714432	11723384	7	3313	8952	protein_coding	0.783956	66.2356	670.586	0.0016	0.0254	0.0629921	0.0164	0.7848	0.020897	NA	0	0.46	1	0.00914548	ENSP00000251547	0	0	0	0	0	0
ENSG00000116663.6	ENSG00000116663	FBXO6	1	11724181	11734411	6	1514	10230	protein_coding	0.658898	18.399	40.5519	0.0031	0.0097	0.319588	0.1678	1.1024	0.152213	NA	0	0.104	6	0.00343095	ENSP00000365944	0	0	0	0	0	0
ENSG00000116670.10	ENSG00000116670	MAD2L2	1	11734537	11751707	11	1849	17170	protein_coding	0.756832	32.6423	40.9829	0	0.0338	0	0.0086	0.7681	0.0111965	0	0	0.03	NA	0.00574858	NA	0	0	0	0	0	0
ENSG00000162490.6	ENSG00000162490	DRAXIN	1	11751786	11785914	7	7339	34128	protein_coding	0.911548	0.645962	1.0361	0.0026	0.0076	0.342105	0.1269	0.7488	0.169471	0	0	NA	NA	4.56e-05	NA	0	0	0	0	0	0
ENSG00000177674.11	ENSG00000177674	AGTRAP	1	11796141	11814859	6	1110	18718	protein_coding	0.865947	101.404	5379.38	NA	NA	NA	0.1309	0.6118	0.213959	3	0	0.111	NA	0.020145	NA	0	0	0	0	0	0
ENSG00000215910.3	ENSG00000215910	C1orf167	1	11821844	11849642	21	4539	27798	protein_coding	0.999358	14.7602	32.1603	0.0236	0.0257	0.918288	NA	NA	NA	2	0	NA	NA	0.00166666	NA	0	0	0	0	0	0
ENSG00000177000.6	ENSG00000177000	MTHFR	1	11845780	11866977	11	7046	21197	protein_coding	0.571582	8.13488	14.6494	0.0007	0.018	0.0388889	0.0465	0.7386	0.0629569	0	0	0.426	35	0.000602792	ENSP00000365775	1	0	0	0	0	0
ENSG00000011021.17	ENSG00000011021	CLCN6	1	11866207	11903201	23	5560	36994	protein_coding	0.519001	18.2214	43.3493	0.0006	0.016	0.0375	0.0146	0.5021	0.0290779	NA	0.043	0.256	NA	0.00172876	NA	0	0	0	0	0	0
ENSG00000175206.6	ENSG00000175206	NPPA	1	11905766	11908402	3	852	2636	protein_coding	0.99962	24211.5	1.70337e+08	0	0.0149	0	0.1052	0.6561	0.160341	3	0	0.448	11	5.03897	ENSP00000365663	0	0	0	0	0	0
ENSG00000120937.8	ENSG00000120937	NPPB	1	11917521	11918988	3	691	1467	protein_coding	0.993876	2120.84	6.06222e+06	0.0099	0.0107	0.925234	NA	NA	NA	3	0	NA	7	0.453438	ENSP00000365651	0	0	0	0	0	0
ENSG00000116685.11	ENSG00000116685	KIAA2013	1	11979648	11986485	3	2812	6837	protein_coding	0.458623	37.2867	343.293	0.0007	0.0274	0.0255474	0.0386	0.849	0.0454653	0	0	0.33	NA	0.00560183	NA	0	0	0	0	0	0
ENSG00000083444.12	ENSG00000083444	PLOD1	1	11994262	12035595	19	2921	41333	protein_coding	0.711849	92.8977	1022.39	0.004	0.0339	0.117994	0.0447	0.9464	0.0472316	0	0.029	0.377	12	0.0137008	ENSP00000196061	1	0	0	0	0	0
ENSG00000116688.12	ENSG00000116688	MFN2	1	12040238	12073571	19	4520	33333	protein_coding	0.728722	116.842	1792.21	0.0012	0.0183	0.0655738	0.0237	0.5054	0.0468935	0	0.04	0.688	315	0.0132174	ENSP00000235329	1	1	0	0	0	0
ENSG00000116691.6	ENSG00000116691	MIIP	1	12079523	12092102	6	1703	12579	protein_coding	0.572675	25.5014	146.263	0.013	0.0237	0.548523	0.2857	0.8482	0.336831	3	0.055	0.194	NA	0.00460737	NA	0	0	0	0	0	0
ENSG00000120949.10	ENSG00000120949	TNFRSF8	1	12123434	12204264	15	3671	80830	protein_coding	0.984099	36.5949	192.445	0.0073	0.0259	0.281853	0.3148	0.8362	0.376465	3	0.015	0.006	NA	0.00476332	NA	0	0	1	0	0	0
ENSG00000028137.12	ENSG00000028137	TNFRSF1B	1	12227060	12269285	10	3673	42225	protein_coding	0.938012	268.224	24348.8	0.0031	0.0291	0.106529	0.2527	0.663	0.381146	3	0	0.094	2	0.0348673	ENSP00000365435	0	0	1	0	0	0
ENSG00000048707.9	ENSG00000048707	VPS13D	1	12290124	12572099	70	16248	281975	protein_coding	0.487758	11.8028	17.6477	0.0017	0.01	0.17	0.0354	0.5496	0.0644105	0	0	0.003	125	0.000188682	ENSP00000350854	0	1	0	0	0	0
ENSG00000162496.4	ENSG00000162496	DHRS3	1	12627939	12677737	6	1717	49798	protein_coding	0.621593	84.6044	1861.56	0	0.0106	0	0.0271	0.6844	0.0395967	0	0	0.166	60	0.01525	ENSP00000365397	0	0	0	0	0	0
ENSG00000204518.2	ENSG00000204518	AADACL4	1	12704566	12727097	4	1571	22531	protein_coding	0.852775	0.760432	1.72916	0.0105	0.0209	0.502392	0.2441	0.9516	0.256515	5	NA	NA	2	0.000140373	ENSP00000365395	0	0	0	0	0	0
ENSG00000188984.7	ENSG00000188984	AADACL3	1	12776118	12788726	3	3829	12608	protein_coding	0.99037	2.58312	52.2065	0.0113	0.0187	0.604278	0.2834	0.8622	0.328694	NA	0	NA	2	0.000327046	ENSP00000352268	0	0	0	0	0	0
ENSG00000157330.5	ENSG00000157330	C1orf158	1	12806163	12823847	4	3760	17684	protein_coding	0.994086	13.1613	25.0756	0.0027	0	NA	0.1563	0.6505	0.240277	2	0	NA	NA	0.00169262	NA	0	0	0	0	0	0
ENSG00000116726.4	ENSG00000116726	PRAMEF12	1	12834984	12838049	3	1783	3065	protein_coding	0.967933	0.104468	0.00528885	0.0047	0.0138	0.34058	0.6534	1.6953	0.385419	6	NA	NA	NA	1.85e-05	NA	0	0	0	0	0	0
ENSG00000116721.9	ENSG00000116721	PRAMEF1	1	12851546	12856777	4	2156	5231	protein_coding	0.99294	0.408709	0.043409	0.0135	0.0315	0.428571	0.6684	1.4841	0.450374	7	NA	NA	NA	6.85e-05	NA	0	0	0	0	0	0
ENSG00000204513.5	ENSG00000204513	PRAMEF11	1	12884468	12891264	4	1835	6796	protein_coding	0.994782	0.537822	0.0845048	NA	NA	NA	0.7645	1.8998	0.402411	6	NA	NA	NA	9.51e-05	NA	0	0	0	0	0	0
ENSG00000179172.7	ENSG00000179172	HNRNPCL1	1	12907261	12908578	2	1106	1317	protein_coding	0.984698	0.141883	0.0108503	NA	NA	NA	0.0509	0.4278	0.118981	9	NA	NA	205	2.83e-05	ENSP00000365370	0	0	0	0	0	0
ENSG00000120952.4	ENSG00000120952	PRAMEF2	1	12916941	12921764	4	1638	4823	protein_coding	0.990569	0.384058	0.0378373	0.0304	0.0317	0.958991	0.6872	1.596	0.430576	10	NA	NA	NA	7.01e-05	NA	0	0	0	0	0	0
ENSG00000243073.3	ENSG00000243073	PRAMEF4	1	12939045	12946025	4	1824	6980	protein_coding	0.913439	0.0292818	0.0146979	0.0178	0.0268	0.664179	0.7385	1.5424	0.478799	NA	NA	NA	NA	5.19e-06	NA	0	0	0	0	0	0
ENSG00000187545.5	ENSG00000187545	PRAMEF10	1	12952727	12958101	4	1521	5374	protein_coding	0.994281	0.303266	0.746357	0.0126	0.0382	0.329843	0.7115	1.6464	0.432155	10	NA	NA	NA	5.64e-05	NA	0	0	0	0	0	0
ENSG00000204510.1	ENSG00000204510	PRAMEF7	1	12976450	12980569	4	1840	4119	protein_coding	0.931417	0.0155205	0.00652427	0.0132	0.0338	0.390533	0.6421	1.5438	0.415922	7	NA	NA	NA	2.74e-06	NA	0	0	0	0	0	0
ENSG00000232423.3	ENSG00000232423	PRAMEF6	1	12998181	13117751	4	1851	119570	protein_coding	0.960247	0.0119268	0.000199729	0.0142	0.0149	0.95302	0.7501	1.4335	0.523265	NA	NA	NA	NA	2.1e-06	NA	0	0	0	0	0	0
ENSG00000204508.3	ENSG00000204508	PRAMEF22	1	13035543	13038381	3	1443	2838	protein_coding	0.962173	0.0188291	0.00125056	NA	NA	NA	0.7063	1.1937	0.59169	10	NA	NA	NA	3.55e-06	NA	0	0	0	0	0	0
ENSG00000239810.2	ENSG00000239810	WI2-3308P17.2	1	13052394	13052998	1	604	604	protein_coding	0.970162	0.0609198	0.00443333	NA	NA	NA	NA	NA	NA	NA	NA	NA	NA	1.32e-05	NA	0	0	0	0	0	0
ENSG00000229571.2	ENSG00000229571	PRAMEF26	1	13216356	13219581	2	1474	3225	protein_coding	0.927278	0.0466815	0.00168189	NA	NA	NA	0.8421	2.7825	0.302642	NA	NA	NA	NA	8.77e-06	NA	0	0	0	0	0	0
ENSG00000204503.5	ENSG00000204503	PRAMEF3	1	13328196	13331692	3	2101	3496	protein_coding	0.977976	0.00734222	0.000220683	NA	NA	NA	0.7087	1.1897	0.595696	10	NA	NA	NA	1.24e-06	NA	0	0	0	0	0	0
ENSG00000204502.2	ENSG00000204502	PRAMEF5	1	13359819	13369057	4	1851	9238	protein_coding	0.938223	0.00228272	3.08e-05	NA	NA	NA	0.7421	1.4583	0.50888	11	NA	NA	NA	4.02e-07	NA	0	0	0	0	0	0
ENSG00000182330.6	ENSG00000182330	PRAMEF8	1	13386646	13390765	4	1840	4119	protein_coding	0.988201	0.000475804	5.43e-06	0.0121	0.0373	0.324397	0.6421	1.5438	0.415922	11	NA	NA	NA	8.41e-08	NA	0	0	0	0	0	0
ENSG00000204501.2	ENSG00000204501	PRAMEF9	1	13421176	13428191	4	1859	7015	protein_coding	0.941283	0.0014018	2.63e-05	0.0101	0.0223	0.452915	0.714	1.5697	0.454864	11	NA	NA	NA	2.46e-07	NA	0	0	0	0	0	0
ENSG00000204495.3	ENSG00000204495	PRAMEF13	1	13447414	13452656	4	2160	5242	protein_coding	0.99651	0.0968479	0.0047386	NA	NA	NA	0.6816	1.4085	0.483919	12	NA	NA	NA	1.62e-05	NA	0	0	0	0	0	0
ENSG00000204491.2	ENSG00000204491	PRAMEF18	1	13474689	13477522	3	1437	2833	protein_coding	0.951104	0.01322	0.000540767	NA	NA	NA	0.7213	1.193	0.60461	10	NA	NA	NA	2.49e-06	NA	0	0	0	0	0	0
ENSG00000204488.3	ENSG00000204488	PRAMEF16	1	13495254	13498260	3	1584	3006	protein_coding	0.925118	0.00415511	0.00010776	NA	NA	NA	0.715	1.4459	0.494502	7	NA	NA	NA	7.67e-07	NA	0	0	0	0	0	0
ENSG00000204486.3	ENSG00000204486	PRAMEF21	1	13516066	13526943	4	1593	10877	protein_coding	0.971054	0.00127701	9.05e-05	NA	NA	NA	0.7283	1.6104	0.452248	11	NA	NA	NA	2.36e-07	NA	0	0	0	0	0	0
ENSG00000157358.7	ENSG00000157358	PRAMEF15	1	13641973	13648988	4	1859	7015	protein_coding	0.959349	0.000679885	1.12e-05	NA	NA	NA	0.714	1.5697	0.454864	12	NA	NA	NA	1.2e-07	NA	0	0	0	0	0	0
ENSG00000204481.6	ENSG00000204481	PRAMEF14	1	13668269	13673511	4	2096	5242	protein_coding	0.997772	0.0555281	0.00206496	NA	NA	NA	0.6816	1.4085	0.483919	6	NA	NA	NA	9.39e-06	NA	0	0	0	0	0	0
ENSG00000204480.6	ENSG00000204480	PRAMEF19	1	13694889	13698405	3	2120	3516	protein_coding	0.981278	0.00701272	0.000608171	0.02	0.0201	0.995025	0.7213	1.193	0.60461	6	NA	NA	NA	1.18e-06	NA	0	0	0	0	0	0
ENSG00000204479.4	ENSG00000204479	PRAMEF17	1	13716092	13719089	3	1575	2997	protein_coding	0.93927	0.0116525	0.000266843	0.0244	0.0233	1.04721	0.7135	1.5073	0.473363	NA	NA	NA	NA	2.16e-06	NA	0	0	0	0	0	0
ENSG00000204478.5	ENSG00000204478	PRAMEF20	1	13736907	13747803	4	1593	10896	protein_coding	0.992526	0.00461688	0.000122882	0.034	0.0752	0.452128	0.7284	1.6177	0.450269	6	NA	NA	NA	8.5e-07	NA	0	0	0	0	0	0
ENSG00000162494.5	ENSG00000162494	LRRC38	1	13801445	13840543	2	2207	39098	protein_coding	0.965809	15.6127	169.298	0.0041	0.0561	0.0730838	0.0523	1.1007	0.0475152	0	0	NA	8	0.00259148	ENSP00000365253	0	0	0	0	0	0
ENSG00000162493.12	ENSG00000162493	PDPN	1	13909960	13944452	6	3098	34492	protein_coding	0.710145	25.6893	370.766	0.0059	0.0102	0.578431	0.4501	0.8147	0.552473	3	0	NA	1	0.00368	ENSP00000294489	0	1	0	0	0	0
ENSG00000116731.18	ENSG00000116731	PRDM2	1	14026693	14151574	10	7947	124881	protein_coding	0.450092	13.9628	13.7862	0.0034	0.016	0.2125	0.0859	0.598	0.143645	0	0	0.031	1	0.000893249	ENSP00000235372	0	0	0	0	0	0
ENSG00000189337.11	ENSG00000189337	KAZN	1	14925200	15444539	15	6015	519339	protein_coding	0.89238	37.3271	188.824	0.007	0.0479	0.146138	0.084	0.7799	0.107706	0	0.003	NA	3	0.00328421	ENSP00000365198	0	0	0	0	0	0
ENSG00000171729.9	ENSG00000171729	TMEM51	1	15479028	15546976	3	1939	67948	protein_coding	0.656551	19.6029	95.4287	0	0.0506	0	0.0741	0.9633	0.0769231	0	0	0.58	NA	0.00340473	NA	0	0	0	0	0	0
ENSG00000204464.3	ENSG00000204464	C1orf195	1	15490840	15497813	2	439	6973	protein_coding	0.953822	0.551644	0.0861741	0.0153	0.0279	0.548387	NA	NA	NA	6	NA	NA	NA	0.000123131	NA	0	0	0	0	0	0
ENSG00000142621.15	ENSG00000142621	FHAD1	1	15573768	15726779	31	5059	153011	protein_coding	0.981771	11.3115	20.039	0.031	0.0618	0.501618	0.2574	1.8069	0.142454	2	NA	NA	NA	0.00116685	NA	0	0	0	0	0	0
ENSG00000142634.8	ENSG00000142634	EFHD2	1	15736391	15756839	4	2415	20448	protein_coding	0.860523	237.798	16716.8	NA	NA	NA	0.0284	1.9467	0.0145888	0	0.011	0.008	7	0.0381892	ENSP00000365147	0	0	0	0	0	0
ENSG00000162438.7	ENSG00000162438	CTRC	1	15764935	15775737	5	3142	10802	protein_coding	0.999845	2226.41	1.04008e+06	0.0064	0.0613	0.104405	0.1297	1.1932	0.108699	0	0	0.269	39	0.316981	ENSP00000365116	0	0	0	0	0	0
ENSG00000142615.7	ENSG00000142615	CELA2A	1	15783223	15798586	8	911	15363	protein_coding	0.999858	5304.66	1.51175e+07	0.0032	0.0421	0.0760095	0.1805	0.9497	0.19006	4	0	NA	36	1.09277	ENSP00000352639	0	0	0	0	0	0
ENSG00000215704.5	ENSG00000215704	CELA2B	1	15792404	15817895	8	915	25491	protein_coding	0.999775	1314.51	839204	NA	NA	NA	0.2121	0.9671	0.219315	0	0	0.005	34	0.269921	ENSP00000365075	0	0	0	0	0	0
ENSG00000132906.13	ENSG00000132906	CASP9	1	15817327	15853029	8	4455	35702	protein_coding	0.791682	24.2476	227.708	0.0024	0.0077	0.311688	0.1325	0.5779	0.229278	0	0	0.091	NA	0.00276364	NA	0	1	0	0	0	0
ENSG00000116138.8	ENSG00000116138	DNAJC16	1	15853308	15918874	15	6284	65566	protein_coding	0.383255	5.24871	10.386	0.0027	0.0075	0.36	0.0558	0.8196	0.068082	0	0.02	0.012	141	0.000441983	ENSP00000365007	0	0	0	0	0	0
ENSG00000116771.5	ENSG00000116771	AGMAT	1	15898848	15911605	7	2493	12757	protein_coding	0.969745	36.0692	4101.33	0.0041	0.0196	0.209184	0.1326	0.7595	0.174589	0	0	0.019	82	0.00571773	ENSP00000364986	0	0	0	0	0	0
ENSG00000197312.7	ENSG00000197312	DDI2	1	15943995	15995539	10	10615	51544	protein_coding	0.745231	6.28616	10.94	0	0.0093	0	0.0222	0.4391	0.050558	0	0.041	0	960	0.000257235	ENSP00000417748	0	0	0	0	0	0
ENSG00000116786.7	ENSG00000116786	PLEKHM2	1	16010827	16061264	20	4102	50437	protein_coding	0.707893	101.032	678.197	0.0026	0.0115	0.226087	0.0535	0.5855	0.0913749	0	0	0.074	NA	0.0122334	NA	0	0	0	0	0	0
ENSG00000162461.7	ENSG00000162461	SLC25A34	1	16062900	16067891	5	2981	4991	protein_coding	0.80442	13.0152	139.682	0.0045	0.0184	0.244565	0.064	0.5897	0.10853	0	0.007	0.391	12	0.00189814	ENSP00000294454	0	0	0	0	0	0
ENSG00000162460.6	ENSG00000162460	TMEM82	1	16068917	16074477	6	1514	5560	protein_coding	0.967206	21.4428	146.376	0.0077	0.0484	0.159091	0.1236	1.0699	0.115525	0	0	NA	NA	0.00399035	NA	0	0	0	0	0	0
ENSG00000162458.8	ENSG00000162458	FBLIM1	1	16083102	16113089	9	3686	29987	protein_coding	0.89607	181.371	2225.26	0.0091	0.0209	0.435407	0.235	1.0305	0.228045	0	0.002	NA	60	0.0234975	ENSP00000416387	0	0	0	0	0	0
ENSG00000065526.6	ENSG00000065526	SPEN	1	16174359	16266955	15	12217	92596	protein_coding	0.404475	17.7189	23.1564	0.0062	0.0147	0.421769	0.1095	0.6778	0.161552	0	0	0.017	49	0.000554201	ENSP00000364912	0	1	0	0	0	0
ENSG00000116809.7	ENSG00000116809	ZBTB17	1	16268364	16302627	16	2754	34263	protein_coding	0.513892	19.3495	14.6357	0.0005	0.0172	0.0290698	0.0348	0.9504	0.0366162	0	0	0.007	334	0.00292669	ENSP00000364895	0	1	0	0	0	0
ENSG00000183888.4	ENSG00000183888	C1orf64	1	16330731	16335302	2	3037	4571	protein_coding	0.931665	2.97324	31.2038	0.0056	0.0217	0.258065	0.4568	0.754	0.605836	3	0.049	NA	NA	0.000429623	NA	0	0	0	0	0	0
ENSG00000173641.13	ENSG00000173641	HSPB7	1	16340523	16346089	3	2889	5566	protein_coding	0.943458	1175.09	244345	0	0.0611	0	0.0241	0.8587	0.0280657	0	0.07	NA	18	0.174956	ENSP00000310111	0	0	0	0	0	0
ENSG00000186510.7	ENSG00000186510	CLCNKA	1	16345370	16360545	24	3036	15175	protein_coding	0.976393	68.5999	8962.58	0.0112	0.0244	0.459016	0.0983	0.668	0.147156	7	0	NA	NA	0.00992493	NA	1	0	0	0	0	0
ENSG00000184908.13	ENSG00000184908	CLCNKB	1	16370272	16383803	20	2547	13531	protein_coding	0.992552	109.296	4335.9	0.0084	0.0315	0.266667	0.106	0.7099	0.149317	0	0	NA	NA	0.0171094	NA	1	0	0	0	0	0
ENSG00000185519.8	ENSG00000185519	FAM131C	1	16384264	16400127	7	1688	15863	protein_coding	0.878576	8.83786	390.924	0.0279	0.1163	0.239897	0.1235	0.9508	0.129891	3	0	NA	NA	0.00160122	NA	0	0	0	0	0	0
ENSG00000142627.9	ENSG00000142627	EPHA2	1	16450832	16482582	17	3947	31750	protein_coding	0.882848	90.3989	2316.74	0.0009	0.0238	0.0378151	0.0352	0.9734	0.0361619	0	0	0	1034	0.0112361	ENSP00000351209	0	0	0	0	0	0
ENSG00000142632.12	ENSG00000142632	ARHGEF19	1	16524349	16539104	16	3013	14755	protein_coding	0.782301	22.8343	42.4377	0.0017	0.0105	0.161905	0.0785	0.8739	0.0898272	0	NA	NA	1	0.00331134	ENSP00000270747	0	0	0	0	0	0
ENSG00000204377.3	ENSG00000204377	C1orf134	1	16555368	16556038	2	250	670	protein_coding	0.676461	2.65795	2.29768	NA	NA	NA	NA	NA	NA	6	0	NA	NA	0.00061234	NA	0	0	0	0	0	0
ENSG00000132881.7	ENSG00000132881	RSG1	1	16558195	16563657	5	1540	5462	protein_coding	0.559986	5.17187	3.86288	0.0037	0.0296	0.125	0.065	0.713	0.0911641	0	0	NA	41	0.000959854	ENSP00000364749	0	0	0	0	0	0
ENSG00000037637.6	ENSG00000037637	FBXO42	1	16573334	16678949	10	6192	105615	protein_coding	0.483188	9.42901	8.30801	0.0007	0.0033	0.212121	0.0224	0.4631	0.0483697	0	0	0.076	275	0.000806156	ENSP00000364742	0	0	0	0	0	0
ENSG00000055070.12	ENSG00000055070	SZRD1	1	16679070	16724640	4	3632	45570	protein_coding	0.660081	18.2644	21.5053	0	0	NA	0.0116	0.2055	0.0564477	0	0	NA	NA	0.0023972	NA	0	0	0	0	0	0
ENSG00000187144.7	ENSG00000187144	SPATA21	1	16713612	16763919	17	3602	50307	protein_coding	0.994024	5.52593	4.26411	0.0068	0.0137	0.49635	0.2146	0.7135	0.300771	2	0.036	NA	74	0.000728031	ENSP00000335612	0	0	0	0	0	0
ENSG00000157191.15	ENSG00000157191	NECAP2	1	16767167	16786573	7	4612	19406	protein_coding	0.643237	52.4674	100.115	0.0035	0.0168	0.208333	0.1426	0.764	0.186649	0	0	0.483	1	0.00584063	ENSP00000391942	0	0	0	0	0	0
ENSG00000268674.1	ENSG00000268674	AL355149.2	1	16865561	16866070	1	509	509	protein_coding	0.968481	0.119806	0.0840705	0.003	0.006	0.5	NA	NA	NA	NA	NA	NA	NA	2.65e-05	NA	0	0	0	0	0	0
ENSG00000219481.6	ENSG00000219481	NBPF1	1	16888814	16940057	29	5903	51243	protein_coding	0.715513	13.6185	33.6302	0.0871	0.1399	0.622588	NA	NA	NA	9	0.14	NA	NA	0.00122003	NA	0	0	0	0	0	0
ENSG00000237847.2	ENSG00000237847	AL137798.1	1	16999498	17000007	1	509	509	protein_coding	0.96969	0.270323	0.0404962	0.003	0	NA	NA	NA	NA	NA	NA	NA	NA	5.95e-05	NA	0	0	0	0	0	0
ENSG00000268991.1	ENSG00000268991	AL021920.2	1	17060447	17060956	1	509	509	protein_coding	NA	0	0	NA	NA	NA	NA	NA	NA	NA	NA	NA	NA	0	NA	0	0	0	0	0	0
ENSG00000058453.12	ENSG00000058453	CROCC	1	17066768	17299474	37	6619	232706	protein_coding	0.518806	13.3802	111.324	0.0043	0.0381	0.112861	0.0926	1.239	0.0747377	0	0	0.218	NA	0.00106683	NA	0	0	0	0	0	0
ENSG00000117122.9	ENSG00000117122	MFAP2	1	17300997	17307330	6	2365	6333	protein_coding	0.754162	18.8024	283.546	0.0239	0.0372	0.642473	0.0458	0.6445	0.0710628	0	0.078	NA	12	0.00304188	ENSP00000364685	0	0	0	0	0	0
ENSG00000159363.13	ENSG00000159363	ATP13A2	1	17312453	17338423	29	3952	25970	protein_coding	0.783323	50.2579	479.018	0.0056	0.0301	0.186047	0.0737	0.7565	0.0974223	0	0	0.187	166	0.00624672	ENSP00000327214	0	0	0	0	0	0
ENSG00000117118.5	ENSG00000117118	SDHB	1	17345217	17380665	8	1145	35448	protein_coding	0.620598	65.735	780.528	0	0.0195	0	0.0414	0.6908	0.0599305	0	0	0.008	1160	0.013028	ENSP00000364649	1	0	0	0	0	0
ENSG00000117115.8	ENSG00000117115	PADI2	1	17393256	17445948	16	4329	52692	protein_coding	0.948231	87.3774	3653.2	0	0.028	0	0.0347	0.8459	0.0410214	0	0.063	0.672	2	0.010193	ENSP00000364635	0	0	0	0	0	0
ENSG00000142623.8	ENSG00000142623	PADI1	1	17531621	17572500	16	3830	40879	protein_coding	0.987419	96.9491	4540.23	0.005	0.0157	0.318471	0.1374	1.147	0.119791	2	0	NA	1	0.0122812	ENSP00000364620	0	0	0	0	0	0
ENSG00000142619.4	ENSG00000142619	PADI3	1	17575593	17610728	16	3173	35135	protein_coding	0.986602	41.5581	2050.07	0.0047	0.0149	0.315436	0.0676	0.8814	0.0766962	1	0	NA	1	0.00588271	ENSP00000364609	0	0	0	0	0	0
ENSG00000159339.9	ENSG00000159339	PADI4	1	17634690	17690499	16	2251	55809	protein_coding	0.991404	102.953	3320.92	0.0043	0.0354	0.121469	0.1478	0.8404	0.175869	3	0	0.187	1	0.0169854	ENSP00000364597	0	0	1	0	0	0
ENSG00000269468.1	ENSG00000269468	AC004824.2	1	17655507	17676070	6	333	20563	protein_coding	0.989366	0.446882	0.193475	NA	NA	NA	NA	NA	NA	NA	NA	NA	NA	0.000101487	NA	0	0	0	0	0	0
ENSG00000179051.9	ENSG00000179051	RCC2	1	17733256	17766220	13	4074	32964	protein_coding	0.662011	52.8325	158.247	0	0.0195	0	0.0167	0.7813	0.0213746	0	0.078	0.051	101	0.00642518	ENSP00000364582	0	0	0	0	0	0
ENSG00000074964.12	ENSG00000074964	ARHGEF10L	1	17866330	18024369	20	4565	158039	protein_coding	0.662784	36.7544	149.655	0.0034	0.0396	0.0858586	0.0409	0.795	0.0514465	0	0.093	0.005	134	0.0041262	ENSP00000355060	0	0	0	0	0	0
ENSG00000117148.6	ENSG00000117148	ACTL8	1	18081808	18153558	3	1858	71750	protein_coding	0.998619	7.95365	4.32709	0.0012	0.017	0.0705882	0.9148	4.5743	0.199987	3	0	NA	1010	0.00139978	ENSP00000364555	0	0	0	0	0	0
ENSG00000117154.7	ENSG00000117154	IGSF21	1	18434240	18704977	10	1933	270737	protein_coding	0.956453	30.6685	212.554	0.0009	0.0227	0.0396476	0.0298	0.7553	0.0394545	0	0.025	NA	NA	0.00533826	NA	0	0	0	0	0	0
ENSG00000179023.7	ENSG00000179023	KLHDC7A	1	18807424	18812478	1	5054	5054	protein_coding	0.952959	8.91422	44.9456	0.0139	0.0317	0.438486	0.1942	0.7781	0.249582	0	0	0.16	19	0.000920824	ENSP00000383505	0	0	0	0	0	0
ENSG00000009709.7	ENSG00000009709	PAX7	1	18957500	19075360	9	5529	117860	protein_coding	0.961478	0.836112	9.71154	0.0016	0.0274	0.0583942	0.0537	0.8679	0.0618735	0	NA	NA	NA	7.98e-05	NA	1	1	0	0	0	0
ENSG00000179002.5	ENSG00000179002	TAS1R2	1	19166093	19186176	6	2536	20083	protein_coding	0.913861	0.0861238	0.0218227	0.0042	0.0266	0.157895	0.1804	1.457	0.123816	2	NA	NA	NA	1.35e-05	NA	0	0	0	0	0	0
ENSG00000255275.3	ENSG00000255275	RP13-279N23.2	1	19175767	19247615	27	4342	71848	protein_coding	0.934699	0.0813978	0.0228501	NA	NA	NA	0.0132	0.4879	0.0270547	NA	NA	NA	189	9.47e-06	ENSP00000455952	0	0	0	0	0	0
ENSG00000159423.12	ENSG00000159423	ALDH4A1	1	19197926	19229275	15	3348	31349	protein_coding	0.934217	204.777	11544.2	0.0022	0.0261	0.0842912	0.0406	0.7971	0.0509346	0	0	0.034	203	0.0281558	ENSP00000290597	1	0	0	0	0	0
ENSG00000169991.6	ENSG00000169991	IFFO2	1	19230775	19283180	9	6179	52405	protein_coding	0.922967	14.8979	71.6514	0.0235	0.0727	0.323246	0.0495	0.6672	0.0741906	0	0	0.115	190	0.00127654	ENSP00000387941	0	0	0	0	0	0
ENSG00000127481.10	ENSG00000127481	UBR4	1	19401000	19536770	107	15838	135770	protein_coding	0.55581	31.2567	158.851	0.0005	0.0163	0.0306748	0.0151	0.533	0.0283302	0	0	0.024	106	0.000535891	ENSP00000364403	0	1	0	0	0	0
ENSG00000127463.9	ENSG00000127463	EMC1	1	19542158	19578046	23	6641	35888	protein_coding	0.624074	12.212	14.6702	0.0015	0.0163	0.0920245	0.0332	0.4994	0.0664798	0	0	NA	32	0.000967741	ENSP00000420608	0	0	0	0	0	0
ENSG00000053372.4	ENSG00000053372	MRTO4	1	19578033	19586622	8	2307	8589	protein_coding	0.590366	29.8603	187.436	0	0.0046	0	0.0362	0.5008	0.0722843	0	0	0.3	1030	0.00488489	ENSP00000364320	0	0	0	0	0	0
ENSG00000162482.4	ENSG00000162482	AKR7A3	1	19609052	19615744	7	1703	6692	protein_coding	0.935051	146.936	12619.1	0.0082	0.0332	0.246988	0.0817	0.7524	0.108586	7	0	0.034	38	0.0265601	ENSP00000355377	0	0	0	0	0	0
ENSG00000053371.8	ENSG00000053371	AKR7A2	1	19630459	19638640	7	1355	8181	protein_coding	0.498358	50.8265	500.159	0.0062	0.0318	0.194969	NA	NA	NA	4	0	0.198	35	0.00972685	ENSP00000235835	0	0	0	0	0	0
ENSG00000040487.8	ENSG00000040487	PQLC2	1	19638820	19655794	8	2145	16974	protein_coding	0.545257	13.7952	15.0822	0.0044	0.018	0.244444	0.0694	0.6403	0.108387	0	0	0.113	NA	0.00231628	NA	0	0	0	0	0	0
ENSG00000077549.13	ENSG00000077549	CAPZB	1	19665267	19812066	9	2059	146799	protein_coding	0.392432	105.422	1285.44	0.1107	0.1693	0.653869	0.0048	0.3546	0.0135364	0	0	0.03	34	0.0178784	ENSP00000264202	0	0	0	0	0	0
ENSG00000270136.1	ENSG00000270136	MINOS1-NBL1	1	19923473	19984549	4	1619	61076	protein_coding	0.892689	0.0705995	0.0230212	NA	NA	NA	0.0296	0.6445	0.0459271	NA	NA	NA	NA	1.29e-05	NA	0	0	0	0	0	0
ENSG00000173436.9	ENSG00000173436	MINOS1	1	19923477	19956314	4	3708	32837	protein_coding	0.643023	4.1298	13.4521	0	0.0259	0	0.0248	0.4092	0.0606061	2	0	NA	53	0.000534195	ENSP00000325562	0	0	0	0	0	0
ENSG00000158747.9	ENSG00000158747	NBL1	1	19967048	19984945	4	2168	17897	protein_coding	0.822222	2.76968	4.49481	NA	NA	NA	0.0296	0.6445	0.0459271	5	0.017	0.549	NA	0.000463155	NA	0	0	0	0	0	0
ENSG00000158748.3	ENSG00000158748	HTR6	1	19991780	20006055	3	1981	14275	protein_coding	0.949103	0.772483	3.29061	0.0029	0.0455	0.0637363	0.0588	0.6636	0.0886076	0	0	0.554	NA	0.000133169	NA	0	0	0	0	0	0
ENSG00000162542.9	ENSG00000162542	TMCO4	1	20008706	20126438	16	2958	117732	protein_coding	0.627637	15.8453	27.4627	0.0022	0.0281	0.0782918	0.1078	0.7154	0.150685	0	0.025	0.12	50	0.00231584	ENSP00000294543	0	0	0	0	0	0
ENSG00000178828.5	ENSG00000178828	RNF186	1	20140523	20141771	1	1248	1248	protein_coding	0.948903	18.3384	274.454	0.0058	0.0197	0.294416	0.2305	0.9299	0.247876	2	0	NA	36	0.00356703	ENSP00000364263	0	0	0	0	0	0
ENSG00000169914.5	ENSG00000169914	OTUD3	1	20209006	20239438	8	6389	30432	protein_coding	0.693234	11.9759	7.82001	0.0024	0.0196	0.122449	0.0947	0.5168	0.183243	0	0	0.297	NA	0.000992717	NA	0	0	0	0	0	0
ENSG00000188784.4	ENSG00000188784	PLA2G2E	1	20246502	20250110	4	781	3608	protein_coding	0.976573	0.341215	1.78429	0.0093	0.0327	0.284404	0.0951	0.9822	0.0968235	3	NA	NA	NA	7.18e-05	NA	0	0	0	0	0	0
ENSG00000188257.6	ENSG00000188257	PLA2G2A	1	20301925	20306932	3	1303	5007	protein_coding	0.799066	575.12	474971	0.013	0.0356	0.365169	0.2468	0.856	0.288318	4	0	NA	NA	0.111056	NA	0	0	0	0	0	0
ENSG00000127472.6	ENSG00000127472	PLA2G5	1	20354672	20417683	10	1861	63011	protein_coding	0.904129	48.6239	611.316	0.0029	0	NA	0.1286	1.1044	0.116443	3	0	NA	NA	0.00855284	NA	0	0	0	0	0	0
ENSG00000117215.10	ENSG00000117215	PLA2G2D	1	20438432	20446050	4	2668	7618	protein_coding	0.968921	3.62598	22.0234	0.0062	0	NA	0.1612	0.74	0.217838	3	0	0.082	NA	0.00055841	NA	0	0	0	0	0	0
ENSG00000158786.4	ENSG00000158786	PLA2G2F	1	20465819	20476879	2	4127	11060	protein_coding	0.970916	20.5894	797.542	0.0163	0.0325	0.501538	0.1593	0.7833	0.20337	3	0	NA	NA	0.00248474	NA	0	0	0	0	0	0
ENSG00000187980.6	ENSG00000187980	PLA2G2C	1	20487746	20503917	4	3245	16171	protein_coding	0.951353	1.30234	0.481793	0.0246	0.0183	1.34426	0.1985	0.8078	0.245729	4	NA	NA	NA	0.000181641	NA	0	0	0	0	0	0
ENSG00000162543.5	ENSG00000162543	UBXN10	1	20512578	20522541	2	5569	9963	protein_coding	0.874613	12.8867	94.5083	0.0107	0.0115	0.930435	0.1788	0.9676	0.184787	0	0	0.144	NA	0.0012235	NA	0	0	0	0	0	0
ENSG00000158816.11	ENSG00000158816	VWA5B1	1	20617412	20681387	21	4376	63975	protein_coding	0.959121	4.22568	5.72245	0.0074	0.037	0.2	0.1532	0.694	0.220749	0	0	NA	NA	0.000489471	NA	0	0	0	0	0	0
ENSG00000162545.5	ENSG00000162545	CAMK2N1	1	20808884	20812713	2	2334	3829	protein_coding	0.947978	347.432	17530.8	0	0	NA	0.0103	0.2119	0.0486078	0	0	0.054	NA	0.0564362	NA	0	0	0	0	0	0
ENSG00000090432.5	ENSG00000090432	MUL1	1	20825943	20834654	4	2432	8711	protein_coding	0.256474	18.3759	46.0651	0.0014	0.0101	0.138614	0.0512	0.6621	0.0773297	0	0	0.433	NA	0.00294409	NA	0	0	1	0	0	0
ENSG00000183114.6	ENSG00000183114	FAM43B	1	20878932	20881512	1	2580	2580	protein_coding	0.960408	15.9059	27.9433	0.0062	0.0135	0.459259	0.0325	0.6361	0.0510926	0	0	NA	NA	0.00248208	NA	0	0	0	0	0	0
ENSG00000158825.5	ENSG00000158825	CDA	1	20915441	20945401	4	959	29960	protein_coding	0.959722	202.367	13573.3	0	0.0138	0	0.0988	0.644	0.153416	0	0	0.408	24	0.0413172	ENSP00000364212	0	0	0	0	0	0
ENSG00000158828.5	ENSG00000158828	PINK1	1	20959948	20978004	5	3816	18056	protein_coding	0.674097	88.7569	646.624	0.0017	0.0117	0.145299	0.1161	0.5981	0.194115	0	0	0.083	2	0.0112809	ENSP00000364204	1	0	0	0	0	0
ENSG00000244038.5	ENSG00000244038	DDOST	1	20978270	20988000	11	2068	9730	protein_coding	0.547471	131.69	821.336	0.002	0.0143	0.13986	0.0443	0.7167	0.0618111	NA	0	0.102	257	0.022442	ENSP00000364188	0	0	0	0	0	0
ENSG00000117245.8	ENSG00000117245	KIF17	1	20990507	21044510	15	3954	54003	protein_coding	0.956493	30.344	68.6642	0.0044	0.0329	0.133739	0.1031	1.0323	0.0998741	0	0	0.117	60	0.00376168	ENSP00000247986	0	0	0	0	0	0
ENSG00000189410.7	ENSG00000189410	SH2D5	1	21046225	21059330	9	3696	13105	protein_coding	0.971639	15.5806	152.055	0.02	0.0646	0.309598	0.0667	0.7863	0.0848277	0	0	NA	NA	0.00202183	NA	0	0	0	0	0	0
ENSG00000127483.13	ENSG00000127483	HP1BP3	1	21069154	21113816	9	4813	44662	protein_coding	0.435632	60.6176	487.198	0	0.0089	0	0.0513	0.4198	0.122201	0	0	0.035	5	0.00651959	ENSP00000312625	0	0	0	0	0	0
ENSG00000075151.15	ENSG00000075151	EIF4G3	1	21132963	21503377	35	6161	370414	protein_coding	0.765039	43.9107	68.053	0.0018	0.0074	0.243243	0.0712	0.4816	0.147841	0	0.007	0.026	249	0.00377239	ENSP00000364073	0	0	0	0	0	0
ENSG00000117298.10	ENSG00000117298	ECE1	1	21543740	21671997	19	5080	128257	protein_coding	0.533488	68.2506	481.405	0.0028	0.032	0.0875	0.0193	0.7873	0.0245142	0	0	0.119	NA	0.00702809	NA	0	1	0	0	0	0
ENSG00000142794.14	ENSG00000142794	NBPF3	1	21766621	21811498	18	4383	44877	protein_coding	0.808338	7.6986	4.65758	0.015	0.0106	1.41509	NA	NA	NA	11	0	0.716	NA	0.00088996	NA	0	0	0	0	0	0
ENSG00000162551.9	ENSG00000162551	ALPL	1	21835858	21904905	12	2577	69047	protein_coding	0.973587	376.105	111249	0.003	0.0324	0.0925926	0.0569	0.9249	0.0615202	0	0.008	0.022	2	0.058725	ENSP00000363965	1	1	0	0	0	0
ENSG00000076864.15	ENSG00000076864	RAP1GAP	1	21922708	21995801	25	4269	73093	protein_coding	0.93102	137.417	6608.66	0.0013	0.0263	0.0494297	0.0721	0.7965	0.090521	0	0	0.581	2	0.0161382	ENSP00000290101	0	0	0	0	0	0
ENSG00000090686.11	ENSG00000090686	USP48	1	22004791	22110099	27	4568	105308	protein_coding	0.68105	30.3132	40.804	0.001	0.0056	0.178571	0.0279	0.6711	0.0415735	0	0	0.056	108	0.00339569	ENSP00000309262	0	0	0	0	0	0
ENSG00000187942.7	ENSG00000187942	LDLRAD2	1	22138758	22151714	5	4007	12956	protein_coding	0.762723	2.65481	4.40999	0.0117	0.01	1.17	NA	NA	NA	0	0	0.058	NA	0.000326098	NA	0	0	0	0	0	0
ENSG00000142798.12	ENSG00000142798	HSPG2	1	22148738	22263790	97	14230	115052	protein_coding	0.667541	83.0001	864.426	0.0157	0.0604	0.259934	0.0726	0.7869	0.0922608	0	0.025	0.165	64	0.00185793	ENSP00000363827	1	1	0	0	0	0
ENSG00000219073.3	ENSG00000219073	CELA3B	1	22303514	22325135	5	991	21621	protein_coding	0.999861	9062.67	1.3356e+07	NA	NA	NA	0.0917	0.7764	0.118109	0	0	NA	43	1.84328	ENSP00000338369	0	0	0	0	0	0
ENSG00000142789.15	ENSG00000142789	CELA3A	1	22328149	22339032	8	879	10883	protein_coding	0.999867	24170.7	7.24212e+07	0.0131	0.0595	0.220168	0.121	0.7573	0.159778	10	0.006	NA	42	5.01634	ENSP00000290122	0	0	0	0	0	0
ENSG00000070831.11	ENSG00000070831	CDC42	1	22379120	22419437	7	2247	40317	protein_coding	0.542028	99.4532	1401.39	0	0.0054	0	0	0.1723	0	0	0	0.125	119	0.0164191	ENSP00000314458	0	1	1	0	0	0
ENSG00000162552.10	ENSG00000162552	WNT4	1	22443798	22470462	5	3840	26664	protein_coding	0.880418	15.508	118.136	0.0448	0.1206	0.371476	0.0048	0.8135	0.00590043	0	0	0.169	16	0.00196121	ENSP00000290167	1	1	0	0	0	0
ENSG00000184677.12	ENSG00000184677	ZBTB40	1	22778344	22857650	19	8973	79306	protein_coding	0.513733	14.4851	38.4497	0.0073	0.0102	0.715686	0.1238	0.5723	0.21632	0	0	0.145	326	0.000779703	ENSP00000364798	0	0	0	0	0	0
ENSG00000070886.6	ENSG00000070886	EPHA8	1	22890057	22930087	17	4926	40030	protein_coding	0.946354	2.34222	1.54835	0.0035	0.0348	0.100575	0.0207	1.0003	0.0206938	NA	0	NA	929	0.000247048	ENSP00000166244	0	0	0	0	0	0
ENSG00000173372.12	ENSG00000173372	C1QA	1	22962999	22966101	3	1140	3102	protein_coding	0.949374	791.941	67794.6	0.0052	0.0067	0.776119	0.1872	0.9221	0.203015	0	0.001	0.296	38	0.157181	ENSP00000363773	1	0	1	1	0	0
ENSG00000159189.7	ENSG00000159189	C1QC	1	22970123	22974603	3	1180	4480	protein_coding	0.942218	682.709	59673.8	0.0053	0.0128	0.414062	0.1477	1.0607	0.139248	0	0	0.164	19	0.134648	ENSP00000363768	1	0	1	1	0	0
ENSG00000173369.11	ENSG00000173369	C1QB	1	22979255	22988031	3	1251	8776	protein_coding	0.950812	915.445	100693	0.0162	0.0418	0.38756	0.1367	0.9083	0.150501	1	0.019	0.302	40	0.178262	ENSP00000313967	1	0	1	1	0	0
ENSG00000133216.12	ENSG00000133216	EPHB2	1	23037332	23241818	17	4624	204486	protein_coding	0.831063	8.34313	34.8913	0.0004	0.0217	0.0184332	0.0021	0.744	0.00282258	0	0.023	0.29	1051	0.000925971	ENSP00000363763	0	0	0	0	0	0
ENSG00000215906.4	ENSG00000215906	LACTBL1	1	23279536	23291831	6	1635	12295	protein_coding	0.999308	0.448104	0.097458	NA	NA	NA	0.1063	1.1543	0.0920904	0	NA	NA	1	8.19e-05	ENSP00000402297	0	0	0	0	0	0
ENSG00000227868.2	ENSG00000227868	C1orf234	1	23337327	23342343	3	507	5016	protein_coding	0.999136	61.7093	555.529	NA	NA	NA	0.2479	0.769	0.322367	NA	0.028	NA	NA	0.0136078	NA	0	0	0	0	0	0
ENSG00000004487.11	ENSG00000004487	KDM1A	1	23345941	23410182	21	3038	64241	protein_coding	0.763439	89.6913	160.072	0	0.0064	0	0.0086	0.4394	0.0195721	0	0	0.055	66	0.0129733	ENSP00000383042	0	1	0	0	0	0
ENSG00000169641.9	ENSG00000169641	LUZP1	1	23410516	23504301	5	8893	93785	protein_coding	0.536887	10.7083	18.9309	0.0053	0.0127	0.417323	0.1071	0.4696	0.228066	0	0	0.062	NA	0.000583092	NA	0	1	0	0	0	0
ENSG00000179546.3	ENSG00000179546	HTR1D	1	23516993	23521222	1	2834	4229	protein_coding	0.980479	2.97035	7.64022	0.0023	0.0208	0.110577	0.0509	0.8331	0.0610971	0	0	NA	NA	0.000444411	NA	0	0	0	0	0	0
ENSG00000125944.14	ENSG00000125944	HNRNPR	1	23630264	23670829	10	7636	40565	protein_coding	0.51829	27.7768	25.0883	0	0.0032	0	0.0014	0.2703	0.00517943	0	0	0.001	27	0.00186812	ENSP00000363745	0	0	0	0	0	0
ENSG00000125945.10	ENSG00000125945	ZNF436	1	23685941	23695935	4	4067	9994	protein_coding	0.573016	14.2126	134.795	0.0021	0.017	0.123529	0.0257	1.9276	0.0133326	3	NA	NA	352	0.00173	ENSP00000313582	0	0	0	0	0	0
ENSG00000249087.3	ENSG00000249087	C1orf213	1	23695490	23698332	1	2546	2842	protein_coding	NA	0	0	NA	NA	NA	NA	NA	NA	NA	NA	0.102	NA	0	NA	0	0	0	0	0	0
ENSG00000204219.5	ENSG00000204219	TCEA3	1	23707554	23751233	11	1548	43679	protein_coding	0.839061	88.4918	936.023	0	0.0097	0	0.04	0.4786	0.0835771	2	0.007	0.182	143	0.0164089	ENSP00000406293	0	0	0	0	0	0
ENSG00000088280.14	ENSG00000088280	ASAP3	1	23755056	23811061	25	4025	56005	protein_coding	0.658907	37.1569	91.5956	NA	NA	NA	0.0958	0.7338	0.130553	0	NA	NA	6	0.00456396	ENSP00000338769	0	0	0	0	0	0
ENSG00000007968.6	ENSG00000007968	E2F2	1	23832922	23857712	7	5184	24790	protein_coding	0.846338	5.49761	14.1323	0.002	0.01	0.2	0.0848	0.6516	0.130141	0	0	0.018	17	0.000556224	ENSP00000355249	0	0	0	0	0	0
ENSG00000117318.8	ENSG00000117318	ID3	1	23884409	23886285	3	1248	1876	protein_coding	0.654862	166.959	6530.13	0.0038	0.0109	0.348624	0.0148	0.7206	0.0205384	0	0	0.023	NA	0.0325516	NA	0	0	0	0	0	0
ENSG00000197880.4	ENSG00000197880	MDS2	1	23907985	23967058	7	1774	59073	protein_coding	0.88819	0.507194	0.186103	0.0144	0.0147	0.979592	NA	NA	NA	NA	NA	0.079	NA	9.05e-05	NA	0	0	0	0	0	0
ENSG00000142676.8	ENSG00000142676	RPL11	1	24018269	24022915	3	991	4646	protein_coding	0.583682	782.243	38621.5	0.0032	0.0281	0.113879	0	0.4476	0	0	0	0	722	0.1591	ENSP00000363676	0	0	0	0	0	0
ENSG00000011007.8	ENSG00000011007	TCEB3	1	24069645	24088549	11	5143	18904	protein_coding	0.411922	18.4585	51.4205	0.0044	0.014	0.314286	0.0883	0.6211	0.142167	0	NA	NA	3	0.00188377	ENSP00000395574	0	1	0	0	0	0
ENSG00000057757.5	ENSG00000057757	PITHD1	1	24104895	24114722	6	1597	9827	protein_coding	0.665695	67.0805	792.128	0.0021	0.0334	0.0628743	0.0085	0.4217	0.0201565	0	0	NA	16	0.0123399	ENSP00000246151	0	0	0	0	0	0
ENSG00000011009.6	ENSG00000011009	LYPLA2	1	24117460	24122029	10	1800	4569	protein_coding	0.519325	43.8844	161.301	0.0286	0.011	2.6	0.0061	0.2888	0.0211219	0	0	0.02	6	0.00780467	ENSP00000363638	0	0	0	0	0	0
ENSG00000117308.10	ENSG00000117308	GALE	1	24122089	24127271	2	2071	5182	protein_coding	0.777023	24.9568	390.362	0.0013	0.0086	0.151163	0.0301	0.5918	0.0508618	0	0	0.03	43	0.00424825	ENSP00000363621	1	0	0	0	0	0
ENSG00000117305.10	ENSG00000117305	HMGCL	1	24128375	24165110	10	2141	36735	protein_coding	0.823789	48.2077	236.613	0.0016	0.0127	0.125984	0.0645	0.5961	0.108203	0	0	0.001	85	0.0080956	ENSP00000363614	1	1	0	0	0	0
ENSG00000179163.11	ENSG00000179163	FUCA1	1	24171567	24194784	8	2039	23217	protein_coding	0.646029	44.7057	987.222	0.032	0.0265	1.20755	0.1016	0.6378	0.159298	0	0	0.312	4	0.0076365	ENSP00000363603	1	0	0	0	0	0
ENSG00000188822.6	ENSG00000188822	CNR2	1	24197016	24285549	3	5347	88533	protein_coding	0.967523	7.18377	10.452	0.0014	0.0219	0.0639269	0.0931	0.7721	0.12058	1	0.013	0.051	NA	0.000706659	NA	0	0	1	0	0	0
ENSG00000189266.7	ENSG00000189266	PNRC2	1	24285599	24289952	3	2413	4353	protein_coding	0.48974	69.6967	302.991	0.0028	0	NA	0.1034	0.422	0.245024	0	0	0	10	0.0111877	ENSP00000334840	0	0	0	0	0	0
ENSG00000188529.10	ENSG00000188529	SRSF10	1	24291294	24307417	4	3953	16123	protein_coding	0.55503	29.6995	39.6916	0	0.0122	0	0	0.2781	0	0	0	0.008	185	0.00368781	ENSP00000420195	0	1	0	0	0	0
ENSG00000142661.14	ENSG00000142661	MYOM3	1	24382525	24438665	37	5772	56140	protein_coding	0.956797	60.3504	1219.05	0.0061	0.0239	0.25523	0.088	0.725	0.121379	0	0	NA	13	0.00553799	ENSP00000363557	0	0	0	0	0	0
ENSG00000142677.3	ENSG00000142677	IL22RA1	1	24446261	24469611	7	2791	23350	protein_coding	0.969068	99.3942	2674	0.004	0.0155	0.258065	0.1649	0.6733	0.244913	3	0	NA	NA	0.0149806	NA	0	0	0	0	0	0
ENSG00000185436.7	ENSG00000185436	IFNLR1	1	24480647	24514449	7	4542	33802	protein_coding	0.733783	5.00328	10.447	0.0054	0.0096	0.5625	0.2663	0.6828	0.390012	3	0	NA	NA	0.000562779	NA	0	0	1	0	0	0
ENSG00000158055.11	ENSG00000158055	GRHL3	1	24645812	24690972	16	2853	45160	protein_coding	0.94669	63.464	953.829	0.0372	0.0859	0.433062	0.0771	0.7149	0.107847	1	0	NA	NA	0.00947166	NA	0	1	0	0	0	0
ENSG00000001460.13	ENSG00000001460	STPG1	1	24683489	24743424	10	6006	59935	protein_coding	0.907469	17.1259	22.5533	0.0332	0.0686	0.483965	0.195	0.7881	0.247431	2	0.087	NA	NA	0.00150789	NA	0	0	0	0	0	0
ENSG00000001461.12	ENSG00000001461	NIPAL3	1	24742284	24799466	13	5468	57182	protein_coding	0.763968	12.6825	107.17	0.0033	0.0281	0.117438	0.0492	0.7045	0.0698368	0	0	0.091	NA	0.00122498	NA	0	0	0	0	0	0
ENSG00000117602.7	ENSG00000117602	RCAN3	1	24829387	24867530	5	6797	38143	protein_coding	0.788119	5.31462	20.2344	0	0.0038	0	0.0477	1.5973	0.0298629	0	0	0.018	1	0.000410393	ENSP00000363516	0	0	0	0	0	0
ENSG00000184454.6	ENSG00000184454	NCMAP	1	24882602	24935819	4	4059	53217	protein_coding	0.987135	52.2685	782.368	0.0044	0.0136	0.323529	0.1046	0.4836	0.216294	2	0	NA	NA	0.00638027	NA	0	0	0	0	0	0
ENSG00000133226.12	ENSG00000133226	SRRM1	1	24958207	24999758	17	3994	41551	protein_coding	0.527281	54.6683	369.708	0	0.0062	0	0.0214	0.4403	0.0486032	0	0	0.002	162	0.00674576	ENSP00000326261	0	0	0	0	0	0
ENSG00000169504.10	ENSG00000169504	CLIC4	1	25071848	25170815	6	4340	98967	protein_coding	0.75989	294.79	8337.67	0	0.0037	0	0.0055	0.6786	0.00810492	NA	0	0.113	64	0.0343412	ENSP00000363500	0	0	0	0	0	0
ENSG00000020633.14	ENSG00000020633	RUNX3	1	25226002	25291612	6	4334	65610	protein_coding	0.948217	65.7711	1634.4	0	0.0465	0	0.0378	0.9024	0.0418883	0	0	0.056	1	0.00766749	ENSP00000343477	0	1	0	0	0	0
ENSG00000117614.5	ENSG00000117614	SYF2	1	25549170	25558993	2	1960	9823	protein_coding	0.409763	27.58	79.3069	0.0088	0.0345	0.255072	0.0491	1.0142	0.0484125	0	0	0.031	43	0.00477766	ENSP00000236273	0	0	0	0	0	0
ENSG00000117616.13	ENSG00000117616	C1orf63	1	25568728	25664704	6	3028	95976	protein_coding	0.514722	49.1802	260.632	0.0121	0.0261	0.463602	0.1334	0.8474	0.157423	2	0.029	0.018	3	0.00712767	ENSP00000243189	0	0	0	0	0	0
ENSG00000187010.14	ENSG00000187010	RHD	1	25598884	25656936	10	2920	58052	protein_coding	0.878108	1.85049	3.95286	0.0525	0.0191	2.74869	0.3483	0.6884	0.505956	11	0	0.842	5	0.000272881	ENSP00000331871	0	0	0	0	0	0
ENSG00000183726.6	ENSG00000183726	TMEM50A	1	25664408	25688852	7	2676	24444	protein_coding	0.59783	55.6447	190.959	0.0031	0	NA	0.0356	0.7467	0.0476764	0	0	0.72	14	0.00854166	ENSP00000363478	0	0	0	0	0	0
ENSG00000188672.12	ENSG00000188672	RHCE	1	25688740	25756683	12	1798	67943	protein_coding	0.859489	2.47217	18.6801	NA	NA	NA	0.3332	0.6868	0.485149	1	0	0.196	5	0.000439271	ENSP00000294413	0	0	0	0	0	0
ENSG00000204178.5	ENSG00000204178	TMEM57	1	25757388	25826700	11	3906	69312	protein_coding	0.54925	17.0791	33.4218	0	0.0137	0	0.0035	0.3776	0.00926907	0	0	0	1	0.00213999	ENSP00000363463	0	0	0	0	0	0
ENSG00000157978.7	ENSG00000157978	LDLRAP1	1	25870071	25895377	7	4663	25306	protein_coding	0.782214	32.4124	225.022	0.0016	0.0328	0.0487805	0.0513	0.9344	0.0549015	0	0.014	0.485	2	0.00357398	ENSP00000363458	0	0	0	0	0	0
ENSG00000117643.10	ENSG00000117643	MAN1C1	1	25943959	26112698	12	4629	168739	protein_coding	0.570657	8.49954	14.573	0.0015	0.0197	0.0761421	0.0564	0.8745	0.064494	0	0	0.008	4	0.000942949	ENSP00000363452	0	0	0	0	0	0
ENSG00000162430.12	ENSG00000162430	SEPN1	1	26126667	26144713	13	4319	18046	protein_coding	0.504657	57.1165	208.924	NA	NA	NA	NA	NA	NA	0	0.05	0.017	4	0.00667036	ENSP00000355141	1	0	0	0	0	0
ENSG00000117640.13	ENSG00000117640	MTFR1L	1	26145131	26159432	6	3256	14301	protein_coding	0.631238	90.5286	526.331	0	0.0033	0	0.0202	0.4009	0.0503866	0	0	NA	NA	0.0126219	NA	0	0	0	0	0	0
ENSG00000127423.6	ENSG00000127423	AUNIP	1	26158414	26185903	3	2113	27489	protein_coding	0.969271	13.0847	5.63981	0.0055	0.0055	1	0.2863	0.4722	0.606311	4	0	NA	NA	0.00221055	NA	0	0	0	0	0	0
ENSG00000182749.5	ENSG00000182749	PAQR7	1	26187701	26197744	2	3295	10043	protein_coding	0.872593	59.3657	130.405	0.0013	0.0191	0.0680628	0.0934	0.7847	0.119026	0	0	0.022	6	0.00823072	ENSP00000363414	0	0	0	0	0	0
ENSG00000117632.16	ENSG00000117632	STMN1	1	26210672	26233482	4	2943	22810	protein_coding	0.906829	119.229	2223.78	0.0029	0.03	0.0966667	0.0497	0.8453	0.0587957	0	0	0.054	NA	0.0174857	NA	0	0	0	0	0	0
ENSG00000158006.9	ENSG00000158006	PAFAH2	1	26286258	26324648	11	3570	38390	protein_coding	0.637885	11.9254	76.8369	0.0024	0.0061	0.393443	0.1227	0.599	0.204841	2	0	0.031	2	0.00157503	ENSP00000363400	0	0	0	0	0	0
ENSG00000158008.5	ENSG00000158008	EXTL1	1	26346375	26362955	11	4004	16580	protein_coding	0.957008	23.6619	166.738	0.0041	0.019	0.215789	0.1541	0.7214	0.213612	2	0	NA	NA	0.00291788	NA	0	0	0	0	0	0
ENSG00000158014.10	ENSG00000158014	SLC30A2	1	26363743	26372624	7	3090	8881	protein_coding	0.982706	39.7246	938.759	0.0012	0.0182	0.0659341	0.1123	0.6807	0.164977	0	0	NA	172	0.00569225	ENSP00000363394	0	0	0	0	0	0
ENSG00000158022.6	ENSG00000158022	TRIM63	1	26377795	26394927	9	1761	17132	protein_coding	0.991943	536.589	268558	0.0014	0.0099	0.141414	0.035	0.8835	0.0396152	1	0.048	NA	13	0.0960922	ENSP00000363390	0	0	0	0	0	0
ENSG00000175087.5	ENSG00000175087	PDIK1L	1	26437664	26452034	4	4275	14370	protein_coding	0.536412	4.34353	1.65316	0	0	NA	0.0027	0.3085	0.00875203	0	0.077	0.029	20	0.000510727	ENSP00000363387	0	0	0	0	0	0
ENSG00000197245.4	ENSG00000197245	FAM110D	1	26485511	26489119	2	1522	3608	protein_coding	0.697322	13.0412	107.573	0.0238	0.0678	0.351032	0.0792	0.7763	0.102022	2	0.008	NA	NA	0.00242081	NA	0	0	0	0	0	0
ENSG00000142684.7	ENSG00000142684	ZNF593	1	26496362	26498551	2	1883	2189	protein_coding	0.451069	10.6158	43.596	0	0.0097	0	0.0517	0.6841	0.0755737	2	0	0.616	339	0.0018586	ENSP00000363384	0	0	0	0	0	0
ENSG00000142675.13	ENSG00000142675	CNKSR1	1	26503894	26516377	20	2653	12483	protein_coding	0.723006	18.1499	51.1963	NA	NA	NA	0.1377	0.612	0.225	0	0	0.309	2	0.00279133	ENSP00000354609	0	0	0	0	0	1
ENSG00000188782.3	ENSG00000188782	CATSPER4	1	26517052	26529459	10	1902	12407	protein_coding	0.998751	13.9675	28.0264	0.0077	0.0194	0.396907	0.1968	0.973	0.202261	2	0	NA	NA	0.002447	NA	0	0	0	0	0	0
ENSG00000130695.9	ENSG00000130695	CEP85	1	26560691	26605299	14	3921	44608	protein_coding	0.850899	23.7279	37.2528	0.0013	0.0055	0.236364	0.0794	0.409	0.194132	0	0	NA	NA	0.00295854	NA	0	0	0	0	0	0
ENSG00000142669.9	ENSG00000142669	SH3BGRL3	1	26605667	26608007	3	1652	2340	protein_coding	0.849918	41.9273	303.559	0	0.0373	0	0.0181	0.5507	0.0328673	0	0	0.054	14	0.00763519	ENSP00000270792	0	0	0	0	0	0
ENSG00000158062.16	ENSG00000158062	UBXN11	1	26607819	26644854	14	2632	37035	protein_coding	0.694476	42.2715	454.098	0.0046	0.0248	0.185484	0.1109	0.6857	0.161733	NA	0	0.11	102	0.00654626	ENSP00000363338	0	0	0	0	0	0
ENSG00000169442.4	ENSG00000169442	CD52	1	26644448	26647014	2	579	2566	protein_coding	0.938615	215.936	5608.27	0.0069	0	NA	NA	NA	NA	5	0	0.062	NA	0.0470701	NA	0	0	0	0	0	0
ENSG00000176092.9	ENSG00000176092	AIM1L	1	26648350	26680621	19	2504	32271	protein_coding	0.950815	41.4677	389.555	0.0154	0.0254	0.606299	0.0944	0.6881	0.137189	0	0	0.143	NA	0.00656098	NA	0	0	0	0	0	0
ENSG00000176083.13	ENSG00000176083	ZNF683	1	26688125	26701013	7	1705	12888	protein_coding	0.995986	57.3592	486.906	0.0046	0.0049	0.938776	0.4188	1.1892	0.35217	4	0	0.082	NA	0.0103676	NA	0	0	1	1	0	0
ENSG00000131914.6	ENSG00000131914	LIN28A	1	26737269	26756213	4	4004	18944	protein_coding	0.99922	5.71115	5.24592	0.0042	0.021	0.2	0.0167	0.4756	0.0351135	0	0	NA	44	0.000703001	ENSP00000254231	0	1	0	0	0	0
ENSG00000117682.12	ENSG00000117682	DHDDS	1	26758773	26797785	9	3329	39012	protein_coding	0.512491	15.2075	117.584	0.0027	0.0162	0.166667	0.0377	0.5321	0.0708513	0	0	0.133	79	0.00209427	ENSP00000353104	0	0	0	0	0	0
ENSG00000198830.6	ENSG00000198830	HMGN2	1	26798941	26802463	2	1494	3522	protein_coding	0.567877	134.928	1672.93	0	0	NA	0.0694	0.3066	0.226354	0	0	0.172	1	0.0252568	ENSP00000355228	0	0	0	0	0	0
ENSG00000117676.9	ENSG00000117676	RPS6KA1	1	26856252	26901521	22	3180	45269	protein_coding	0.912083	108.848	4167.83	0.0006	0.0075	0.08	0.0213	0.5709	0.0373095	0	0.004	0.03	77	0.0153959	ENSP00000435412	0	0	0	0	0	0
ENSG00000117713.13	ENSG00000117713	ARID1A	1	27022524	27108595	20	8557	86071	protein_coding	0.448726	22.1213	20.0203	0.0012	0.0063	0.190476	0.0166	0.2332	0.0711835	0	0	0	34	0.00127371	ENSP00000320485	1	1	0	0	0	0
ENSG00000060642.6	ENSG00000060642	PIGV	1	27113963	27124889	4	2709	10926	protein_coding	0.821847	26.008	22.3324	NA	NA	NA	0.128	0.4652	0.27515	0	0	0.199	162	0.00397239	ENSP00000078527	1	0	0	0	0	0
ENSG00000204160.7	ENSG00000204160	ZDHHC18	1	27153201	27184093	8	5012	30892	protein_coding	0.898349	78.787	1914.65	NA	NA	NA	0.0226	0.569	0.0397188	0	NA	NA	NA	0.00820099	NA	0	0	0	0	0	0
ENSG00000175793.10	ENSG00000175793	SFN	1	27189633	27190947	1	1314	1314	protein_coding	0.948667	1386.2	297906	0	0.0241	0	0.0133	1.0953	0.0121428	2	0	0.141	190	0.267973	ENSP00000340989	0	1	0	0	0	0
ENSG00000142751.10	ENSG00000142751	GPN2	1	27202624	27216788	5	4673	14164	protein_coding	0.35697	9.43184	2.87846	0.0014	0.0161	0.0869565	0.0193	0.5665	0.0340688	0	0	0	36	0.00103847	ENSP00000363250	0	0	0	0	0	0
ENSG00000198746.8	ENSG00000198746	GPATCH3	1	27216979	27226957	7	2116	9978	protein_coding	0.467023	11.2272	4.42778	0.0016	0.012	0.133333	0.0886	0.5721	0.154868	0	0.011	0	1	0.00188899	ENSP00000354645	0	0	0	0	0	0
ENSG00000090273.9	ENSG00000090273	NUDC	1	27226729	27273353	9	1791	46624	protein_coding	0.499494	75.439	549.895	0.0101	0.0281	0.359431	0.0271	0.7343	0.0369059	0	0.124	0.01	164	0.013425	ENSP00000319664	0	0	0	0	0	0
ENSG00000131910.4	ENSG00000131910	NR0B2	1	27237980	27240457	2	1154	2477	protein_coding	0.961795	53.5671	1571.05	0.0037	0.0231	0.160173	0.1255	0.7029	0.178546	0	0	NA	NA	0.0106127	NA	0	0	0	0	0	0
ENSG00000175707.7	ENSG00000175707	C1orf172	1	27276053	27286897	4	1789	10844	protein_coding	0.746989	12.7014	29.6563	0.0036	0.0117	0.307692	0.0417	0.6666	0.0625563	0	0	0.017	NA	0.00226199	NA	0	0	0	0	0	0
ENSG00000253368.3	ENSG00000253368	TRNP1	1	27320198	27327389	2	1956	7191	protein_coding	0.850912	69.8318	1503.4	NA	NA	NA	0.0602	0.8465	0.0711164	NA	0.028	0.034	NA	0.0120907	NA	0	0	0	0	0	0
ENSG00000158246.7	ENSG00000158246	FAM46B	1	27331511	27339327	2	2366	7816	protein_coding	0.803621	88.2217	1189.49	0.0021	0.0172	0.122093	0.0408	0.766	0.0532637	1	0	0.003	NA	0.0142686	NA	0	0	0	0	0	0
ENSG00000090020.6	ENSG00000090020	SLC9A1	1	27425306	27493472	12	4504	68166	protein_coding	0.656024	25.6006	432.248	NA	NA	NA	0.0338	0.6097	0.0554371	0	0	0.023	98	0.00289974	ENSP00000263980	0	1	0	0	0	0
ENSG00000142784.11	ENSG00000142784	WDTC1	1	27561007	27635110	10	5139	74103	protein_coding	0.595079	48.9445	159.062	0	0.0053	0	0.0138	0.5387	0.0256172	0	0	0.053	97	0.00498258	ENSP00000355317	0	1	0	0	0	0
ENSG00000186501.10	ENSG00000186501	TMEM222	1	27648651	27662891	3	2858	14240	protein_coding	0.449127	28.6156	59.953	0.0276	0.0912	0.302632	0.0252	0.7951	0.0316941	NA	NA	NA	41	0.00426242	ENSP00000363189	0	0	0	0	0	0
ENSG00000142765.13	ENSG00000142765	SYTL1	1	27668513	27680421	8	2673	11908	protein_coding	0.779766	60.2509	1325.96	0.0057	0.0077	0.74026	0.0934	0.697	0.134003	0	0	0.11	NA	0.00926834	NA	0	0	0	0	0	0
ENSG00000142733.10	ENSG00000142733	MAP3K6	1	27681675	27693383	28	4281	11708	protein_coding	0.535779	50.9364	298.474	0.0021	0.0123	0.170732	0.0663	0.6944	0.0954781	NA	0.02	0.233	147	0.00598387	ENSP00000350195	0	0	0	0	0	0
ENSG00000142748.8	ENSG00000142748	FCN3	1	27695603	27701315	8	1022	5712	protein_coding	0.985096	563.999	166987	0.0099	0.0125	0.792	0.4503	4.9548	0.0908816	2	0	NA	3	0.114156	ENSP00000270879	0	0	1	0	0	0
ENSG00000174950.6	ENSG00000174950	CD164L2	1	27705666	27709870	5	1452	4204	protein_coding	0.885141	9.8125	186.43	0.0028	0.0126	0.222222	0.1149	0.6728	0.170779	2	0	0.253	NA	0.00184822	NA	0	0	0	0	0	0
ENSG00000181773.6	ENSG00000181773	GPR3	1	27719148	27722318	2	2113	3170	protein_coding	0.797756	3.48304	12.5246	0.0015	0.0073	0.205479	0.031	0.4155	0.0746089	0	0	0.081	NA	0.00058723	NA	0	0	0	0	0	0
ENSG00000158195.6	ENSG00000158195	WASF2	1	27730730	27816669	9	5657	85939	protein_coding	0.420023	58.6141	267.127	0.0083	0.0104	0.798077	0.0444	0.3852	0.115265	0	0	0.179	NA	0.00547696	NA	0	1	1	0	0	0
ENSG00000126705.9	ENSG00000126705	AHDC1	1	27860546	27930942	7	6431	70396	protein_coding	0.458585	21.79	46.1143	0.0017	0.0176	0.0965909	0.0238	0.5465	0.0435499	0	NA	NA	NA	0.00179085	NA	0	0	0	0	0	0
ENSG00000000938.8	ENSG00000000938	FGR	1	27938575	27961788	13	2716	23213	protein_coding	0.971552	325.329	33972.5	0.0016	0.0229	0.069869	0.0748	0.7503	0.0996935	0	0	0	823	0.0495969	ENSP00000363115	0	0	1	0	0	0
ENSG00000126709.10	ENSG00000126709	IFI6	1	27992572	27998729	5	836	6157	protein_coding	0.806086	251.812	227271	0.0103	0.0114	0.903509	NA	NA	NA	5	0	0.002	18	0.052612	ENSP00000342513	0	0	1	0	0	0
ENSG00000009780.11	ENSG00000009780	FAM76A	1	28052490	28089633	9	3558	37143	protein_coding	0.585694	9.24399	2.94575	0	0.0053	0	0.0073	0.4485	0.0162765	2	0.043	0	4	0.00122541	ENSP00000010299	0	0	0	0	0	0
ENSG00000117758.9	ENSG00000117758	STX12	1	28099694	28150963	9	3070	51269	protein_coding	0.653663	49.7412	494.21	0	0	NA	0.0359	0.3451	0.104028	0	0	0	131	0.00714987	ENSP00000363054	0	0	0	0	0	0
ENSG00000117751.13	ENSG00000117751	PPP1R8	1	28157289	28178187	7	2644	20898	protein_coding	0.592648	19.3758	38.6273	0	0.0136	0	0.011	0.3971	0.0277008	0	0	0	113	0.0029963	ENSP00000311677	0	1	0	0	0	0
ENSG00000130775.11	ENSG00000130775	THEMIS2	1	28199055	28213196	2	2859	14141	protein_coding	0.933124	109.314	2942.5	0.0097	0.0112	0.866071	0.1936	0.758	0.255409	0	0	NA	5	0.0162422	ENSP00000363031	0	0	1	0	0	0
ENSG00000117748.5	ENSG00000117748	RPA2	1	28218035	28241257	9	1743	23222	protein_coding	0.598837	44.3053	77.0599	0.0335	0.0399	0.839599	0.0587	0.5671	0.103509	0	0	0.403	249	0.00795098	ENSP00000363021	0	0	0	0	0	0
ENSG00000130768.10	ENSG00000130768	SMPDL3B	1	28261504	28285668	8	1905	24164	protein_coding	0.864451	9.16882	43.8009	0.0031	0.0172	0.180233	0.1526	0.6534	0.233548	0	0	0.2	1	0.00160198	ENSP00000363001	0	0	1	0	0	0
ENSG00000158156.7	ENSG00000158156	XKR8	1	28285973	28294607	3	2689	8634	protein_coding	0.783454	19.2622	118.14	0.0102	0.0188	0.542553	0.2136	0.8659	0.24668	0	0	0.126	NA	0.00295858	NA	0	0	0	0	0	0
ENSG00000158161.11	ENSG00000158161	EYA3	1	28296855	28415207	18	6067	118352	protein_coding	0.63614	12.2275	4.23219	0	0.011	0	0.0261	0.3116	0.0837612	0	0	0.317	NA	0.00106492	NA	0	0	0	0	0	0
ENSG00000169403.7	ENSG00000169403	PTAFR	1	28473677	28520447	2	4489	46770	protein_coding	0.957322	44.9335	1796.69	0.0037	0.0156	0.237179	0.108	0.8615	0.125363	0	0.031	0.007	5	0.00509861	ENSP00000301974	0	0	1	0	0	0
ENSG00000126698.6	ENSG00000126698	DNAJC8	1	28525967	28559536	10	1590	33569	protein_coding	0.519156	38.8077	59.4184	0	0.0034	0	0.0035	0.5882	0.00595036	0	0	0.085	52	0.00714375	ENSP00000263697	0	0	0	0	0	0
ENSG00000215902.1	ENSG00000215902	AL353354.1	1	28527013	28527152	2	64	139	protein_coding	NA	0	0	NA	NA	NA	NA	NA	NA	2	NA	NA	NA	0	NA	0	0	0	0	0	0
ENSG00000130770.13	ENSG00000130770	ATPIF1	1	28562620	28573417	2	1853	10797	protein_coding	0.585189	72.1516	914.209	0	0.0313	0	0.1919	0.763	0.251507	0	0	0.125	85	0.012723	ENSP00000335203	0	0	0	0	0	0
ENSG00000130766.4	ENSG00000130766	SESN2	1	28586038	28609002	10	3443	22964	protein_coding	0.695005	23.7246	243.54	0.0019	0.0266	0.0714286	0.0386	0.6402	0.0602937	1	0.024	0.104	NA	0.00320394	NA	0	0	0	0	0	0
ENSG00000130772.9	ENSG00000130772	MED18	1	28655513	28662476	3	1828	6963	protein_coding	0.604319	10.9067	25.529	0	0.0051	0	0.0064	0.5788	0.0110574	0	0.024	0.01	18	0.00192881	ENSP00000362948	0	0	0	0	0	0
ENSG00000204138.8	ENSG00000204138	PHACTR4	1	28696114	28826881	14	6176	130767	protein_coding	0.58069	14.3565	48.0317	0.0033	0.0101	0.326733	0.1115	0.4293	0.259725	0	0	0.244	NA	0.00123432	NA	0	1	0	0	0	0
ENSG00000180198.11	ENSG00000180198	RCC1	1	28832455	28865812	13	2831	33357	protein_coding	0.75643	28.8413	61.6178	0.0012	0.0106	0.113208	0.0341	0.4483	0.0760651	0	0	0.081	316	0.00431159	ENSP00000362937	0	0	0	0	0	0
ENSG00000180098.5	ENSG00000180098	TRNAU1AP	1	28879597	28905051	5	2035	25454	protein_coding	0.385696	6.54465	2.4286	0	0.004	0	0.0065	0.3436	0.0189173	0	0	0	183	0.00111803	ENSP00000362936	0	0	0	0	0	0
ENSG00000120656.7	ENSG00000120656	TAF12	1	28915835	28969597	6	1353	53762	protein_coding	0.528623	15.1632	16.9759	0.0066	0.0058	1.13793	0.0181	0.348	0.0520115	0	0	0.007	11	0.00291137	ENSP00000263974	0	0	0	0	0	0
ENSG00000188060.6	ENSG00000188060	RAB42	1	28918712	28921955	2	1948	3243	protein_coding	0.793254	3.60209	9.6604	0.0042	0	NA	0.1257	0.7462	0.168453	0	0	NA	NA	0.000624421	NA	0	0	0	0	0	0
ENSG00000162419.8	ENSG00000162419	GMEB1	1	28995244	29045865	10	6400	50621	protein_coding	0.439312	3.56787	0.933266	0.0009	0.0034	0.264706	0.0256	0.4436	0.0577096	0	0	0	NA	0.000294792	NA	0	0	0	0	0	0
ENSG00000198492.10	ENSG00000198492	YTHDF2	1	29063133	29096287	5	2920	33154	protein_coding	0.432036	28.7502	189.179	0	0.0017	0	0.0017	0.1666	0.0102041	0	0	0.029	9	0.0042481	ENSP00000362918	0	0	1	0	0	0
ENSG00000116329.6	ENSG00000116329	OPRD1	1	29138654	29190208	3	1771	51554	protein_coding	0.984031	0.464857	0.123677	0.0032	0.0382	0.0837696	0.028	1.0673	0.0262344	0	NA	NA	NA	8.31e-05	NA	0	0	1	0	0	0
ENSG00000159023.14	ENSG00000159023	EPB41	1	29213603	29446553	21	5909	232950	protein_coding	0.596288	6.40338	46.7003	0.0027	0.0069	0.391304	0.0436	0.4373	0.0997027	0	0	0.022	1	0.000573557	ENSP00000345259	0	0	0	0	0	0
ENSG00000253304.1	ENSG00000253304	TMEM200B	1	29445940	29450447	2	2551	4507	protein_coding	0.808069	7.06985	7.38693	0.0032	0.0041	0.780488	0.0733	0.8978	0.081644	NA	0.056	NA	NA	0.00110901	NA	0	0	0	0	0	0
ENSG00000116350.11	ENSG00000116350	SRSF4	1	29474255	29508499	6	2381	34244	protein_coding	0.266989	59.512	168.107	0.0009	0.0029	0.310345	0.045	0.5834	0.077134	0	0	0	355	0.00960158	ENSP00000362900	0	0	0	0	0	0
ENSG00000116353.11	ENSG00000116353	MECR	1	29519385	29557454	10	2406	38069	protein_coding	0.336835	6.55731	6.98867	0.0041	0.0028	1.46429	0.1124	0.5213	0.215615	0	0	0.188	151	0.00105419	ENSP00000263702	0	0	0	0	0	0
ENSG00000060656.15	ENSG00000060656	PTPRU	1	29563028	29653325	30	5549	90297	protein_coding	0.790077	35.1775	226.377	0.0006	0.0165	0.0363636	0.0212	0.724	0.0292818	0	0.022	0.082	16	0.00334968	ENSP00000334941	0	0	0	0	0	0
ENSG00000162510.5	ENSG00000162510	MATN1	1	31184124	31196434	8	3824	12310	protein_coding	0.730996	1.03174	0.521696	0.0073	0.0528	0.138258	0.0501	0.933	0.0536977	0	0	0.067	1	0.000130674	ENSP00000362870	0	0	0	0	0	0
ENSG00000162511.7	ENSG00000162511	LAPTM5	1	31205316	31230667	8	2215	25351	protein_coding	0.937938	676.662	63333	0.041	0.1449	0.282954	0.1156	1.4802	0.0780976	3	0	0.078	23	0.112314	ENSP00000294507	0	0	0	0	0	0
ENSG00000162512.11	ENSG00000162512	SDC3	1	31342314	31381608	3	6389	39294	protein_coding	0.786158	70.8715	459.47	0.0037	0.014	0.264286	0.0969	0.6139	0.157843	0	0.007	0.257	NA	0.00586531	NA	0	0	0	0	0	0
ENSG00000134644.11	ENSG00000134644	PUM1	1	31404353	31538838	22	5353	134485	protein_coding	0.29548	20.6458	42.1158	0	0.0048	0	0.0056	0.241	0.0232365	0	0	0	112	0.00202544	ENSP00000391723	0	0	1	0	0	0
ENSG00000084628.5	ENSG00000084628	NKAIN1	1	31652592	31712401	7	2582	59809	protein_coding	0.95329	8.99199	224.623	0	0.0245	0	0.0022	0.4435	0.00496054	0	0	NA	1	0.00140292	ENSP00000362841	0	0	0	0	0	0
ENSG00000060688.8	ENSG00000060688	SNRNP40	1	31732417	31769662	6	1922	37245	protein_coding	0.611422	15.0947	12.926	0.02	0.0739	0.270636	0.0079	0.5291	0.014931	0	0.023	0.024	133	0.00263048	ENSP00000263694	0	0	0	0	0	0
ENSG00000121766.10	ENSG00000121766	ZCCHC17	1	31769842	31837783	8	1722	67941	protein_coding	0.67824	44.8902	397.761	0.0498	0.1028	0.484436	0.023	0.4569	0.0503392	NA	0.007	0.087	232	0.00808693	ENSP00000343557	0	0	0	0	0	0
ENSG00000121769.3	ENSG00000121769	FABP3	1	31838472	31849697	4	721	11225	protein_coding	0.966798	1674.89	289134	0	0.0079	0	0.0788	0.7823	0.100729	0	0.003	0.023	19	0.355408	ENSP00000362817	0	0	0	0	0	0
ENSG00000168528.7	ENSG00000168528	SERINC2	1	31882412	31907525	11	2796	25113	protein_coding	0.765063	57.5863	2991.42	0.0017	0.0483	0.0351967	0.089	1.1526	0.0772167	0	0.003	0.457	5	0.00867365	ENSP00000362814	0	0	0	0	0	0
ENSG00000142910.11	ENSG00000142910	TINAGL1	1	32042116	32053288	6	4753	11172	protein_coding	0.701107	102.385	1300.14	0.001	0.0119	0.0840336	0.0688	0.9104	0.0755712	0	NA	NA	1	0.0110839	ENSP00000271064	0	0	1	0	0	0
ENSG00000121764.7	ENSG00000121764	HCRTR1	1	32083287	32098119	9	1992	14832	protein_coding	0.846197	0.652056	0.517181	0.0132	0.0231	0.571429	0.0315	0.5557	0.0566853	3	0	NA	NA	0.000112263	NA	0	0	0	0	0	0
ENSG00000162517.8	ENSG00000162517	PEF1	1	32095463	32110497	5	1624	15034	protein_coding	0.576107	58.8112	196.882	0	0.0054	0	0.0667	0.4426	0.1507	0	0.017	0.071	4	0.0107649	ENSP00000362807	0	0	0	0	0	0
ENSG00000084636.13	ENSG00000084636	COL16A1	1	32117848	32169920	71	5665	52072	protein_coding	0.741481	108.036	3728.6	0.0069	0.0087	0.793103	0.0598	0.3996	0.14965	NA	NA	NA	10	0.0100806	ENSP00000362776	0	0	0	0	0	1
ENSG00000121753.8	ENSG00000121753	BAI2	1	32192718	32230494	33	5370	37776	protein_coding	0.970244	43.1009	387.995	0.002	0.0146	0.136986	0.0181	0.4334	0.0417628	0	0	0.011	NA	0.00422569	NA	0	0	0	0	0	0
ENSG00000134668.8	ENSG00000134668	SPOCD1	1	32256023	32281652	16	3944	25629	protein_coding	0.882746	8.54549	54.0344	0.0796	0.0981	0.811417	0.3006	0.7306	0.411443	3	0	0.097	3	0.00106324	ENSP00000353670	0	0	0	0	0	0
ENSG00000184007.13	ENSG00000184007	PTP4A2	1	32372022	32410457	6	3923	38435	protein_coding	0.439726	61.3971	1622.53	0.0074	0.023	0.321739	0	0.1966	0	0	0	0	77	0.00766218	ENSP00000344909	0	0	0	0	0	0
ENSG00000121774.13	ENSG00000121774	KHDRBS1	1	32479430	32526451	9	2748	47021	protein_coding	0.593258	76.1661	122.974	0	0.0021	0	0.0274	0.3353	0.0817179	0	NA	NA	23	0.0115667	ENSP00000313829	0	1	0	0	0	0
ENSG00000121775.13	ENSG00000121775	TMEM39B	1	32537632	32568467	9	2078	30835	protein_coding	0.397219	7.48383	2.76018	0	0.0029	0	0.0171	0.4355	0.0392652	0	0.07	0.07	1	0.00126959	ENSP00000338165	0	0	0	0	0	0
ENSG00000025800.9	ENSG00000025800	KPNA6	1	32573639	32642169	14	7364	68530	protein_coding	0.401228	19.6724	13.6472	0	0.0036	0	0.0036	0.3552	0.0101351	0	0	0.056	199	0.00138522	ENSP00000362728	0	0	0	0	0	0
ENSG00000084652.11	ENSG00000084652	TXLNA	1	32645287	32663886	10	5002	18599	protein_coding	0.371547	33.3021	71.1428	0.0027	0.0166	0.162651	0.058	0.7581	0.0765071	0	0.003	0.016	3	0.00347143	ENSP00000362711	0	0	0	0	0	0
ENSG00000160050.10	ENSG00000160050	CCDC28B	1	32665987	32670988	5	1410	5001	protein_coding	0.847297	22.1175	51.5244	0	0.0042	0	0.0161	0.6213	0.0259134	0	0	0.012	NA	0.00419294	NA	0	0	0	0	0	0
ENSG00000160051.7	ENSG00000160051	IQCC	1	32671236	32674288	5	2288	3052	protein_coding	0.844611	14.5426	6.92756	0.0061	0.0043	1.4186	0.3217	0.5677	0.566673	0	0	0	NA	0.00237644	NA	0	0	0	0	0	0
ENSG00000222046.2	ENSG00000222046	DCDC2B	1	32674695	32681797	7	1856	7102	protein_coding	0.878989	3.68959	45.0546	0.0029	0.0116	0.25	0.2029	0.448	0.452902	NA	0	0	45	0.000649924	ENSP00000386870	0	0	0	0	0	0
ENSG00000160055.15	ENSG00000160055	TMEM234	1	32680073	32687972	4	2732	7899	protein_coding	0.666596	20.0529	103.454	0.0275	0.1061	0.259189	0.0983	0.4374	0.224737	1	0	NA	20	0.00305921	ENSP00000309792	0	0	0	0	0	0
ENSG00000084623.7	ENSG00000084623	EIF3I	1	32687529	32697205	11	1447	9676	protein_coding	0.538556	185.256	954.044	0.1184	0.2555	0.463405	0.0028	0.5257	0.00532623	0	0	0.046	465	0.0348835	ENSP00000362688	0	0	0	0	0	0
ENSG00000183615.5	ENSG00000183615	FAM167B	1	32712834	32714457	2	934	1623	protein_coding	0.722248	20.3611	525.164	0	0.0083	0	0.0749	1.1252	0.0665659	0	0	0.279	NA	0.00419005	NA	0	0	0	0	0	0
ENSG00000182866.12	ENSG00000182866	LCK	1	32716840	32751766	13	2153	34926	protein_coding	0.930565	44.7382	1122.36	0.0012	0.0129	0.0930233	0.0156	0.7002	0.0222793	0	0	0	813	0.00749274	ENSP00000337825	0	0	1	0	0	0
ENSG00000116478.7	ENSG00000116478	HDAC1	1	32757687	32799236	7	2402	41549	protein_coding	0.626897	92.3697	739.355	0.001	0.0157	0.0636943	0.0027	0.6099	0.00442695	0	0	0	336	0.0148586	ENSP00000362649	0	1	0	0	0	0
ENSG00000175130.6	ENSG00000175130	MARCKSL1	1	32799433	32801980	2	1697	2547	protein_coding	0.858853	285.924	41560.5	0	0	NA	0.0202	0.2348	0.0860307	0	0.026	0	2	0.0517266	ENSP00000362638	0	1	0	0	0	0
ENSG00000162526.6	ENSG00000162526	TSSK3	1	32817122	32829913	2	1366	12791	protein_coding	0.813004	2.94149	2.06055	0.0015	0.0136	0.110294	0.0104	0.312	0.0333333	2	0	0.041	915	0.000561901	ENSP00000362634	0	0	0	0	0	0
ENSG00000225828.1	ENSG00000225828	FAM229A	1	32826871	32829879	2	2757	3008	protein_coding	0.969441	170.938	3240.32	NA	NA	NA	0.0833	0.2776	0.300072	NA	0.037	NA	NA	0.0259179	NA	0	0	0	0	0	0
ENSG00000160058.14	ENSG00000160058	BSDC1	1	32830704	32860332	10	4589	29628	protein_coding	0.47807	37.0019	51.4883	0.022	0.0329	0.668693	0.0403	0.4009	0.100524	0	0	0.002	3	0.00413206	ENSP00000397759	0	0	0	0	0	0
ENSG00000254553.1	ENSG00000254553	RP1-27O5.3	1	32930658	33066393	10	3437	135735	protein_coding	0.968618	0.0519416	0.0100385	0.0339	0.0665	0.509774	0.1198	0.9796	0.122295	NA	NA	NA	320	7.02e-06	ENSP00000455300	0	0	0	0	0	0
ENSG00000160062.10	ENSG00000160062	ZBTB8A	1	33005028	33071540	5	7070	66512	protein_coding	0.629156	1.34757	0.337904	0.0023	0.0071	0.323944	0.0841	0.7579	0.110965	0	0	0	324	9.97e-05	ENSP00000362609	0	0	0	0	0	0
ENSG00000176261.11	ENSG00000176261	ZBTB8OS	1	33065773	33116504	7	1594	50731	protein_coding	0.629014	11.8715	5.15415	NA	NA	NA	0.0197	0.4991	0.039471	0	0	0.006	3	0.00218953	ENSP00000417677	0	0	0	0	0	0
ENSG00000162521.14	ENSG00000162521	RBBP4	1	33116743	33151812	12	7931	35069	protein_coding	0.695985	69.9518	182.857	NA	NA	NA	0.0004	0.3743	0.00106866	0	0	0	412	0.00447817	ENSP00000362592	0	0	0	0	0	0
ENSG00000162520.10	ENSG00000162520	SYNC	1	33145507	33169197	4	3409	23690	protein_coding	0.846864	21.4875	152.902	0.0096	0.0108	0.888889	0.1394	0.7399	0.188404	0	0	NA	NA	0.00292305	NA	0	0	0	0	0	0
ENSG00000162522.6	ENSG00000162522	KIAA1522	1	33207486	33240571	7	5431	33085	protein_coding	0.72493	61.8002	567.125	0.0126	0.0277	0.454874	0.1037	0.5238	0.197976	0	0	0.233	NA	0.00599781	NA	0	0	0	0	0	0
ENSG00000134684.6	ENSG00000134684	YARS	1	33240840	33283754	13	3225	42914	protein_coding	0.641912	28.8129	285.445	0.001	0.0069	0.144928	0.0176	0.5058	0.0347964	0	0.011	0.002	840	0.0040375	ENSP00000362576	1	0	0	0	0	0
ENSG00000116497.13	ENSG00000116497	S100PBP	1	33282368	33324476	7	4311	42108	protein_coding	0.721471	14.7521	5.57872	0.0036	0.0161	0.223602	0.1713	0.327	0.523853	2	0	0.189	NA	0.00173123	NA	0	0	0	0	0	0
ENSG00000160097.11	ENSG00000160097	FNDC5	1	33327869	33338083	6	2726	10214	protein_coding	0.913247	37.9856	700.175	0	0.0224	0	0	0.9358	0	0	NA	NA	1	0.00578937	ENSP00000362570	0	0	0	0	0	0
ENSG00000121905.5	ENSG00000121905	HPCA	1	33351595	33364042	4	1464	12447	protein_coding	0.997607	80.5887	71469.1	0	0.0524	0	0	0.5289	0	0	0	NA	27	0.0151549	ENSP00000362566	0	0	0	0	0	0
ENSG00000121900.14	ENSG00000121900	TMEM54	1	33360195	33367039	6	993	6844	protein_coding	0.869861	153.411	13969.1	0.0022	0.0122	0.180328	0.1473	0.7929	0.185774	NA	NA	NA	NA	0.0311178	NA	0	0	0	0	0	0
ENSG00000116514.12	ENSG00000116514	RNF19B	1	33402046	33430286	9	2589	28240	protein_coding	0.877317	86.6013	277.558	0.0019	0.0185	0.102703	0.0255	0.3292	0.0774605	0	0.021	0.018	7	0.0134985	ENSP00000362555	0	0	1	1	0	0
ENSG00000267885.1	ENSG00000267885	FKSG48	1	33439268	33439642	1	374	374	protein_coding	0.872971	0.00486962	0.000460514	NA	NA	NA	NA	NA	NA	NA	NA	NA	NA	1.1e-06	NA	0	0	0	0	0	0
ENSG00000004455.12	ENSG00000004455	AK2	1	33473585	33546597	7	3579	73012	protein_coding	0.682407	51.6814	84.9272	0.0019	0.0059	0.322034	0.0256	0.5775	0.044329	0	0	0.011	278	0.00683251	ENSP00000346921	1	0	0	0	0	0
ENSG00000142920.12	ENSG00000142920	ADC	1	33546705	33586131	7	5841	39426	protein_coding	0.929877	19.0115	21.63	0.0065	0.0144	0.451389	0.0787	0.3802	0.206996	2	0	0.024	186	0.00172216	ENSP00000294517	0	0	0	0	0	0
ENSG00000116525.9	ENSG00000116525	TRIM62	1	33611003	33647660	5	3432	36657	protein_coding	0.657561	8.93795	6.86619	0.0025	0.0509	0.0491159	0.0034	1.0004	0.00339864	0	0	0.015	NA	0.00121079	NA	0	0	1	0	0	0
ENSG00000160094.10	ENSG00000160094	ZNF362	1	33722146	33766320	9	3097	44174	protein_coding	0.46033	19.7935	30.0794	0	0.0095	0	0.0061	0.5062	0.0120506	0	0.022	0.089	374	0.00283565	ENSP00000362527	0	0	0	0	0	0
ENSG00000184389.8	ENSG00000184389	A3GALT2	1	33772367	33786699	5	1018	14332	protein_coding	0.873574	0.604686	0.167019	NA	NA	NA	0.1944	0.8321	0.233626	5	NA	NA	NA	0.000122536	NA	0	0	0	0	0	0
ENSG00000134686.12	ENSG00000134686	PHC2	1	33789224	33896653	14	3856	107429	protein_coding	0.731997	134.734	7561.47	0.0011	0.0092	0.119565	0.0627	0.4243	0.147773	0	0	0.019	1	0.017036	ENSP00000257118	0	0	0	0	0	0
ENSG00000121903.10	ENSG00000121903	ZSCAN20	1	33938246	33962107	8	4308	23861	protein_coding	0.591546	1.42084	0.0969841	0.0042	0.0043	0.976744	0.1356	0.6064	0.223615	1	0.015	0.033	NA	0.000166187	NA	0	0	0	0	0	0
ENSG00000121904.13	ENSG00000121904	CSMD2	1	33979609	34631443	71	13613	651834	protein_coding	0.898299	1.10844	0.701313	0.0021	0.0121	0.173554	0.0199	0.557	0.0357271	0	0	NA	NA	2.75e-05	NA	0	0	0	0	0	0
ENSG00000176256.6	ENSG00000176256	HMGB4	1	34326076	34330392	4	2501	4316	protein_coding	0.999895	228.526	5329.78	NA	NA	NA	0.1616	1.1437	0.141296	4	0	NA	128	0.0362221	ENSP00000429214	0	0	0	0	0	0
ENSG00000142698.10	ENSG00000142698	C1orf94	1	34632484	34684732	7	2280	52248	protein_coding	0.998957	19.4158	51.2425	0.0091	0.0112	0.8125	0.1605	0.5279	0.304035	2	0	NA	NA	0.00318376	NA	0	0	0	0	0	0
ENSG00000163866.8	ENSG00000163866	SMIM12	1	35178338	35325417	2	3452	147079	protein_coding	0.393017	6.66896	3.25413	0	0	NA	0.0249	0.5611	0.0443771	0	0	NA	3	0.000900348	ENSP00000428541	0	0	0	0	0	0
ENSG00000189280.3	ENSG00000189280	GJB5	1	35220648	35224113	2	1353	3465	protein_coding	0.92901	65.4481	596.753	0.0063	0.036	0.175	0.1437	0.9429	0.152402	1	0.016	0.172	3	0.0125265	ENSP00000340811	0	1	0	0	0	0
ENSG00000189433.5	ENSG00000189433	GJB4	1	35225342	35229325	2	2838	3983	protein_coding	0.967785	27.3483	178.261	0.0114	0.0316	0.360759	0.0798	0.9164	0.0870799	0	0.001	NA	4	0.00408226	ENSP00000345868	1	0	0	0	1	0
ENSG00000188910.7	ENSG00000188910	GJB3	1	35246790	35251970	2	2215	5180	protein_coding	0.950562	82.2528	932.241	NA	NA	NA	0.0932	1.1062	0.0842524	0	0	NA	1	0.0136535	ENSP00000362460	1	1	0	0	0	0
ENSG00000187513.8	ENSG00000187513	GJA4	1	35258599	35261348	2	1620	2749	protein_coding	0.738248	61.7154	729.79	0.0027	0.0229	0.117904	0.0526	0.6748	0.077949	1	0	0.164	15	0.0113034	ENSP00000343676	0	0	0	0	0	0
ENSG00000116544.7	ENSG00000116544	DLGAP3	1	35331037	35395186	12	3844	64149	protein_coding	0.976767	24.742	298.56	0.001	0.0127	0.0787402	0.0164	0.31	0.0529032	0	0	0	23	0.00312321	ENSP00000235180	0	0	0	0	0	0
ENSG00000243749.1	ENSG00000243749	ZMYM6NB	1	35447136	35450954	3	919	3818	protein_coding	0.414881	28.3358	101.158	0	0.0062	0	0.2777	0.5792	0.479454	NA	0.009	NA	NA	0.00582722	NA	0	0	0	0	0	0
ENSG00000163867.12	ENSG00000163867	ZMYM6	1	35449523	35497569	15	6226	48046	protein_coding	0.513934	7.95928	3.49728	0.001	0.0042	0.238095	0.1675	0.5008	0.334465	1	0	0.001	19	0.000676642	ENSP00000349708	0	0	0	0	0	0
ENSG00000197056.5	ENSG00000197056	ZMYM1	1	35525387	35581460	11	4192	56073	protein_coding	0.524861	4.71503	1.20488	0.002	0.0076	0.263158	0.2389	0.6426	0.371771	5	0.039	0.01	2	0.000563184	ENSP00000352920	0	0	0	0	0	0
ENSG00000116560.6	ENSG00000116560	SFPQ	1	35641979	35658749	10	3737	16770	protein_coding	0.455668	79.3986	394.645	0	0.0222	0	0.0245	0.4399	0.0556945	0	0.075	0	63	0.0102205	ENSP00000349748	0	0	0	0	0	0
ENSG00000146463.7	ENSG00000146463	ZMYM4	1	35734568	35887659	30	6964	153091	protein_coding	0.521614	14.1618	5.87084	0.0009	0.0046	0.195652	0.0259	0.3161	0.0819361	0	0	0.019	22	0.00106734	ENSP00000322915	0	0	0	0	0	0
ENSG00000142687.13	ENSG00000142687	KIAA0319L	1	35899091	36023551	21	4768	124460	protein_coding	0.435704	15.5621	46.5097	0.0014	0.0091	0.153846	0.1118	0.4579	0.244158	0	0	0	NA	0.00169095	NA	0	0	0	0	0	0
ENSG00000020129.11	ENSG00000020129	NCDN	1	36023074	36032875	7	3676	9801	protein_coding	0.952464	217.026	94562.6	0	0.0091	0	0.0091	0.4514	0.0201595	0	0	0	8	0.028218	ENSP00000348394	0	1	0	0	0	0
ENSG00000116819.6	ENSG00000116819	TFAP2E	1	36038971	36060929	7	2182	21958	protein_coding	0.697296	4.35583	120.311	0.0011	0.0098	0.112245	0.032	0.6431	0.049759	0	0	0.001	10	0.00072731	ENSP00000362332	0	0	0	0	0	0
ENSG00000126067.7	ENSG00000126067	PSMB2	1	36067185	36107445	6	2695	40260	protein_coding	0.655534	62.765	160.427	0	0.0096	0	0.017	0.3048	0.0557743	0	0	0.005	411	0.00961726	ENSP00000362334	0	0	1	0	0	0
ENSG00000142686.7	ENSG00000142686	C1orf216	1	36179476	36185073	2	3216	5597	protein_coding	0.838063	41.6186	347.702	0.0039	0	NA	0.0942	0.6737	0.139825	0	0	0.015	NA	0.00584069	NA	0	0	0	0	0	0
ENSG00000092853.9	ENSG00000092853	CLSPN	1	36185819	36235568	25	4744	49749	protein_coding	0.943059	5.52402	6.33391	0.005	0.0098	0.510204	0.1329	0.5637	0.235764	0	0	0	209	0.000600734	ENSP00000312995	0	0	0	0	0	0
ENSG00000134698.10	ENSG00000134698	AGO4	1	36273773	36323491	18	7098	49718	protein_coding	0.485631	12.9283	95.8918	0	0	NA	0.0056	0.3555	0.0157525	0	0.066	NA	72	0.000948205	ENSP00000362306	0	0	0	0	0	0
ENSG00000092847.6	ENSG00000092847	AGO1	1	36335409	36395211	19	12771	59802	protein_coding	0.283406	5.47437	2.6849	0	0.0076	0	0.0003	0.3254	0.000921942	0	0	NA	90	0.000156161	ENSP00000362300	0	0	0	0	0	0
ENSG00000126070.14	ENSG00000126070	AGO3	1	36396319	36538101	19	19668	141782	protein_coding	0.658162	4.94668	1.45006	0	0.0082	0	0.0054	0.3232	0.0167079	0	0.014	NA	76	4.48e-05	ENSP00000362287	0	0	0	0	0	0
ENSG00000092850.7	ENSG00000092850	TEKT2	1	36549676	36553876	10	1728	4200	protein_coding	0.982666	63.1709	738.739	0.0043	0.012	0.358333	0.0876	0.7239	0.121011	0	0	0.058	26	0.0113716	ENSP00000207457	0	0	0	0	0	0
ENSG00000116863.10	ENSG00000116863	ADPRHL2	1	36554476	36559533	6	1662	5057	protein_coding	0.519022	32.16	473.185	0.0013	0.0176	0.0738636	0.0443	0.6644	0.0666767	0	0	0	NA	0.00585784	NA	0	0	0	0	0	0
ENSG00000171812.6	ENSG00000171812	COL8A2	1	36560837	36590821	4	4666	29984	protein_coding	0.816327	26.0663	77.8019	0.0031	0.0076	0.407895	0.0349	0.385	0.0906494	0	0.028	0	NA	0.0028776	NA	1	0	0	0	0	0
ENSG00000054116.7	ENSG00000054116	TRAPPC3	1	36602173	36615098	3	2425	12925	protein_coding	0.433906	26.0291	26.0581	0.0022	0	NA	0.0079	0.5627	0.0140395	0	0.007	0	22	0.00416498	ENSP00000362261	0	0	0	0	0	0
ENSG00000116871.11	ENSG00000116871	MAP7D1	1	36621180	36646450	16	3440	25270	protein_coding	0.459463	77.9807	868.233	0.0038	0.0183	0.20765	0.0701	0.4084	0.171645	0	0	0.233	NA	0.0105499	NA	0	0	0	0	0	0
ENSG00000054118.9	ENSG00000054118	THRAP3	1	36690017	36770958	12	4420	80941	protein_coding	0.436895	51.5063	280.075	0	0.0135	0	0.0303	0.3908	0.0775333	0	0	0	NA	0.00591573	NA	0	0	0	0	0	0
ENSG00000214193.5	ENSG00000214193	SH3D21	1	36771988	36790484	12	3167	18496	protein_coding	0.871956	33.7386	342.789	0.0231	0.0263	0.878327	0.538	0.9231	0.582819	NA	0.078	NA	1	0.00477033	ENSP00000403476	0	0	0	0	0	0
ENSG00000142694.6	ENSG00000142694	EVA1B	1	36787632	36789755	3	1051	2123	protein_coding	0.741572	46.2679	254.794	0.0045	0.0476	0.0945378	0.0473	0.9159	0.0516432	0	0	NA	NA	0.00932608	NA	0	0	0	0	0	0
ENSG00000116883.8	ENSG00000116883	RP11-268J15.5	1	36789335	36794822	2	1836	5487	protein_coding	0.823106	38.5512	901.021	NA	NA	NA	NA	NA	NA	3	0.009	NA	NA	0.00682136	NA	0	0	0	0	0	0
ENSG00000196182.6	ENSG00000196182	STK40	1	36805225	36851497	9	4828	46272	protein_coding	0.586541	43.0157	432.516	0	0.0224	0	0.016	0.6198	0.0258148	0	0	0	878	0.00461456	ENSP00000362221	0	0	0	0	0	0
ENSG00000181817.5	ENSG00000181817	LSM10	1	36856839	36863493	4	1002	6654	protein_coding	0.481456	28.9716	153.98	0	0.0156	0	0.0602	1.056	0.0570076	0	0.008	0.034	212	0.0058893	ENSP00000319341	0	0	0	0	0	0
ENSG00000116885.14	ENSG00000116885	OSCP1	1	36881428	36916086	11	1452	34658	protein_coding	0.923714	36.8222	110.713	0.0069	0.0086	0.802326	0.0739	0.5186	0.142499	0	0.023	0.09	NA	0.0069332	NA	0	0	0	0	0	0
ENSG00000116898.7	ENSG00000116898	MRPS15	1	36921319	36930038	3	2124	8719	protein_coding	0.739719	54.2275	232.143	0.0092	0.0235	0.391489	0.2272	0.4105	0.553471	0	0	0.033	559	0.00912918	ENSP00000362208	0	0	0	0	0	0
ENSG00000119535.13	ENSG00000119535	CSF3R	1	36931644	36948879	9	6065	17235	protein_coding	0.99127	1239.64	627215	0.0067	0.0237	0.2827	0.2515	0.6462	0.389198	2	0	0	1	0.108274	ENSP00000362195	0	0	0	0	0	0
ENSG00000163873.5	ENSG00000163873	GRIK3	1	37261128	37499730	16	9085	238602	protein_coding	0.932093	12.3247	93.5743	0.0019	0.0414	0.0458937	0.0046	0.8361	0.00550173	0	0	NA	NA	0.000649169	NA	0	0	0	0	0	0
ENSG00000163874.8	ENSG00000163874	ZC3H12A	1	37940153	37949980	6	2678	9827	protein_coding	0.700963	40.3138	1624.29	0.0023	0.0148	0.155405	0.0995	0.8012	0.124189	0	0	0.035	NA	0.0061891	NA	0	0	0	0	0	0
ENSG00000163875.11	ENSG00000163875	MEAF6	1	37958176	37980375	8	2139	22199	protein_coding	0.627336	36.6787	255.721	0	0.0094	0	0.0362	0.6486	0.0558125	0	0.001	0.288	28	0.00616613	ENSP00000362166	0	0	0	0	0	0
ENSG00000163877.9	ENSG00000163877	SNIP1	1	38000050	38019903	4	4559	19853	protein_coding	0.55811	7.68368	1.65516	0.0013	0.0047	0.276596	0.0771	0.6107	0.126249	0	0.016	0.128	186	0.000861983	ENSP00000296215	0	0	0	0	0	0
ENSG00000163879.9	ENSG00000163879	DNALI1	1	38022520	38032458	2	3537	9938	protein_coding	0.937706	49.5974	182.557	0	0.0166	0	0.0235	0.5291	0.044415	0	0	NA	29	0.00660104	ENSP00000296218	0	0	0	0	0	0
ENSG00000134697.8	ENSG00000134697	GNL2	1	38032417	38061536	4	2405	29119	protein_coding	0.516661	15.6781	16.7073	0.0027	0.0014	1.92857	0.0755	0.547	0.138026	0	NA	NA	477	0.00252341	ENSP00000362153	0	0	0	0	0	0
ENSG00000169218.9	ENSG00000169218	RSPO1	1	38076951	38100595	9	2976	23644	protein_coding	0.885426	24.9761	298.963	0.0047	0.0069	0.681159	0.0546	0.6532	0.0835885	1	0	NA	142	0.00365332	ENSP00000348944	0	0	0	0	0	0
ENSG00000116922.10	ENSG00000116922	C1orf109	1	38147242	38157914	1	2621	10672	protein_coding	0.3487	4.84607	1.54836	0.0055	0.0178	0.308989	NA	NA	NA	2	NA	NA	4	0.000751954	ENSP00000350704	0	0	0	0	0	0
ENSG00000134690.6	ENSG00000134690	CDCA8	1	38158090	38175391	10	2459	17301	protein_coding	0.942959	35.7952	106.417	0.0036	0.0109	0.330275	0.1249	0.5775	0.216277	2	0	0.096	190	0.00570245	ENSP00000316121	0	1	0	0	0	0
ENSG00000183317.12	ENSG00000183317	EPHA10	1	38179552	38230805	17	5408	51253	protein_coding	0.94759	14.5924	65.5825	NA	NA	NA	NA	NA	NA	NA	0	NA	920	0.0014224	ENSP00000362139	0	0	0	0	0	0
ENSG00000185090.10	ENSG00000185090	MANEAL	1	38259474	38266809	4	2681	7335	protein_coding	0.891296	13.4233	26.4639	0.0018	0.0121	0.14876	0.0248	0.7643	0.032448	0	0	0.031	NA	0.00205689	NA	0	0	0	0	0	0
ENSG00000196449.3	ENSG00000196449	YRDC	1	38268616	38273857	5	1821	5241	protein_coding	0.635336	23.2455	25.0905	0.0017	0.0164	0.103659	0.0811	0.5245	0.154623	0	0.006	0.029	160	0.00411015	ENSP00000362135	0	0	0	0	0	0
ENSG00000197982.12	ENSG00000197982	C1orf122	1	38272651	38275126	2	2227	2475	protein_coding	0.629601	137.91	2087.24	NA	NA	NA	0.0824	0.3206	0.257018	0	NA	NA	NA	0.0228483	NA	0	0	0	0	0	0
ENSG00000188786.9	ENSG00000188786	MTF1	1	38275239	38325292	11	7961	50053	protein_coding	0.585035	6.80376	13.4478	0.0013	0.0055	0.236364	0.0381	0.2603	0.14637	0	0	0.021	328	0.000432852	ENSP00000362127	0	1	0	0	0	0
ENSG00000230610.1	ENSG00000230610	AL929472.1	1	38292232	38293886	2	43	1654	protein_coding	NA	0	0	NA	NA	NA	NA	NA	NA	NA	NA	NA	NA	0	NA	0	0	0	0	0	0
ENSG00000204084.8	ENSG00000204084	INPP5B	1	38326369	38412729	24	4670	86360	protein_coding	0.553697	10.406	9.18414	0.0055	0.007	0.785714	0.0758	0.5303	0.142938	0	0	0.601	16	0.00114587	ENSP00000362115	0	0	0	0	0	0
ENSG00000183431.7	ENSG00000183431	SF3A3	1	38422647	38456593	17	3656	33946	protein_coding	0.507576	26.554	74.5095	0	0.0017	0	0.0037	0.4501	0.0082204	0	0.08	0.423	280	0.00347054	ENSP00000362110	0	0	0	0	0	0
ENSG00000183386.5	ENSG00000183386	FHL3	1	38462442	38471278	6	1641	8836	protein_coding	0.965264	426.691	28247.4	0.0017	0.029	0.0586207	0.0127	0.6103	0.0208094	0	0.053	0.831	4	0.0779525	ENSP00000362107	0	0	0	0	0	0
ENSG00000183520.7	ENSG00000183520	UTP11L	1	38474930	38490496	8	2011	15566	protein_coding	0.756281	29.1392	75.7592	0.0021	0.0065	0.323077	0.05	0.637	0.0784929	NA	0	0.149	461	0.00499467	ENSP00000362105	0	0	0	0	0	0
ENSG00000185668.5	ENSG00000185668	POU3F1	1	38509523	38512450	1	2927	2927	protein_coding	0.935426	21.0374	140.953	0.0358	0.2108	0.169829	0.0027	0.4855	0.00556128	0	0	NA	7	0.00309396	ENSP00000362103	0	1	0	0	0	0
ENSG00000116954.7	ENSG00000116954	RRAGC	1	39303870	39325495	7	2725	21625	protein_coding	0.501634	15.0264	53.0136	0.0099	0.0248	0.399194	0.0045	0.3206	0.0140362	0	0.017	0.002	14	0.00228566	ENSP00000362092	0	0	0	0	0	0
ENSG00000214114.4	ENSG00000214114	MYCBP	1	39328636	39347289	6	3225	18653	protein_coding	0.977754	0.630481	0.487872	0	0	NA	0.0144	0.1375	0.104727	2	NA	0.007	1	8.83e-05	ENSP00000380702	0	0	0	0	0	0
ENSG00000158315.6	ENSG00000158315	RHBDL2	1	39351479	39407471	8	2121	55992	protein_coding	0.853154	8.18366	18.502	0	0.0229	0	0.1091	0.4505	0.242175	0	0	0.014	61	0.00137849	ENSP00000289248	0	0	0	0	0	0
ENSG00000174574.11	ENSG00000174574	AKIRIN1	1	39456895	39471731	5	2736	14836	protein_coding	0.704275	67.151	117.309	NA	NA	NA	0.0397	0.3377	0.11756	0	0	0.121	6	0.010221	ENSP00000392678	0	0	0	0	0	0
ENSG00000168653.6	ENSG00000168653	NDUFS5	1	39491990	39500308	3	545	8318	protein_coding	0.596515	432.904	13753.7	0	0	NA	0.1766	1.1153	0.158343	0	0	0.323	103	0.0948945	ENSP00000362058	0	0	0	0	0	0
ENSG00000127603.19	ENSG00000127603	MACF1	1	39546988	39952849	101	24727	405861	protein_coding	0.642326	31.0903	228.874	NA	NA	NA	0.0396	0.4247	0.0932423	0	0	0.113	27	0.000120983	ENSP00000354573	0	1	0	0	0	0
ENSG00000183682.7	ENSG00000183682	BMP8A	1	39957318	39991607	7	1685	34289	protein_coding	0.929	9.62576	68.2425	0.0116	0.0703	0.165007	0.0691	0.6035	0.114499	0	0	0.205	1	0.00174519	ENSP00000327440	0	0	0	0	0	0
ENSG00000090621.9	ENSG00000090621	PABPC4	1	40026488	40042462	2	3590	15974	protein_coding	0.671978	137.513	1469.68	0	0.0059	0	0.0109	0.4273	0.025509	0	0	0.091	419	0.0182042	ENSP00000361949	0	0	0	0	0	0
ENSG00000163909.6	ENSG00000163909	HEYL	1	40089825	40105617	5	3656	15792	protein_coding	0.821443	62.9854	881.673	0.0058	0.0105	0.552381	0.1267	0.5245	0.241563	2	0	0.014	1	0.00821969	ENSP00000361943	0	0	0	0	0	0
ENSG00000116981.3	ENSG00000116981	NT5C1A	1	40124793	40137710	6	1101	12917	protein_coding	0.961803	5.29472	10.4716	0.0012	0.0216	0.0555556	0.0302	0.558	0.0541219	0	0	NA	NA	0.00105671	NA	0	0	0	0	0	0
ENSG00000116983.8	ENSG00000116983	HPCAL4	1	40144320	40157361	4	4852	13041	protein_coding	0.992518	70.9182	1803.08	0	0	NA	0.0021	1.0606	0.00198001	0	0	0.664	6	0.00757827	ENSP00000361935	0	0	0	0	0	0
ENSG00000084072.12	ENSG00000084072	PPIE	1	40157854	40229586	10	4641	71732	protein_coding	0.504268	12.1754	10.2886	0.035	0.0509	0.687623	0.0416	0.5102	0.0815367	5	0	0.175	355	0.0013507	ENSP00000361918	0	0	0	0	0	0
ENSG00000116985.6	ENSG00000116985	BMP8B	1	40222854	40254533	7	4815	31679	protein_coding	0.944047	23.9336	55.9663	0.0084	0.0598	0.140468	0.069	0.6156	0.112086	5	0	0.036	2	0.0025704	ENSP00000361915	0	1	0	0	0	0
ENSG00000198754.5	ENSG00000198754	OXCT2	1	40235195	40237020	1	1825	1825	protein_coding	0.991316	33.8315	179.05	NA	NA	NA	0.1445	1.5043	0.096058	5	0	NA	69	0.00598408	ENSP00000361914	0	0	0	0	0	0
ENSG00000043514.11	ENSG00000043514	TRIT1	1	40306723	40349183	11	2101	42460	protein_coding	0.455219	14.807	22.563	0.0011	0.008	0.1375	0.064	0.3899	0.164145	0	0	0.532	230	0.00250242	ENSP00000321810	0	0	0	0	0	0
ENSG00000116990.9	ENSG00000116990	MYCL	1	40361098	40367928	3	3253	6830	protein_coding	0.894457	19.6032	176.385	0.0072	0.0069	1.04348	0.065	0.6561	0.0990703	0	0	NA	NA	0.00273494	NA	0	0	0	0	0	0
ENSG00000168389.13	ENSG00000168389	MFSD2A	1	40420802	40435638	9	2423	14836	protein_coding	0.890067	58.0825	1177.59	0.0009	0.0182	0.0494505	0.0814	0.6206	0.131163	0	0	0.028	1	0.00931024	ENSP00000361895	0	0	0	0	0	0
ENSG00000131236.12	ENSG00000131236	CAP1	1	40505905	40538321	13	3092	32416	protein_coding	0.749578	267.387	23513.3	0.0055	0.0065	0.846154	0.0285	0.3627	0.0785773	0	0.013	0.022	729	0.0382701	ENSP00000361878	0	0	0	0	0	0
ENSG00000131238.12	ENSG00000131238	PPT1	1	40538379	40563375	9	2731	24996	protein_coding	0.673619	82.0448	3394	0.0035	0.0093	0.376344	0.0824	0.557	0.147935	0	NA	NA	9	0.0124824	ENSP00000394863	1	0	0	0	0	0
ENSG00000117000.8	ENSG00000117000	RLF	1	40627045	40706593	8	6238	79548	protein_coding	0.48497	11.2057	52.1596	0.001	0.0117	0.0854701	0.0694	0.5421	0.128021	0	0	0	342	0.000950156	ENSP00000361857	0	0	0	0	0	0
ENSG00000188800.5	ENSG00000188800	TMCO2	1	40711619	40717363	2	737	5744	protein_coding	0.999706	97.7528	1172.69	0.0082	0	NA	0.1525	0.2847	0.535652	4	0	NA	NA	0.0207583	NA	0	0	0	0	0	0
ENSG00000084073.4	ENSG00000084073	ZMPSTE24	1	40723779	40759856	10	3098	36077	protein_coding	0.471908	24.3287	56.132	0.0011	0.002	0.55	0.0341	0.3763	0.0906192	0	0	0.02	29	0.00347953	ENSP00000361845	1	1	0	0	0	0
ENSG00000049089.9	ENSG00000049089	COL9A2	1	40766159	40783488	31	2856	17329	protein_coding	0.948988	102.692	1535.17	NA	NA	NA	0.0571	0.3816	0.149633	0	0	0.061	4	0.0153558	ENSP00000361834	1	0	0	0	0	0
ENSG00000084070.7	ENSG00000084070	SMAP2	1	40810522	40888998	10	2929	78476	protein_coding	0.933042	344.747	62193.6	0	0.0166	0	0.0201	0.3178	0.0632473	0	0	0.006	56	0.0508123	ENSP00000361803	0	0	0	0	0	0
ENSG00000187801.10	ENSG00000187801	ZFP69B	1	40915774	40929390	5	2377	13616	protein_coding	0.806127	2.21279	0.762854	0.0051	0.0245	0.208163	NA	NA	NA	5	0	NA	322	0.000356868	ENSP00000399664	0	0	0	0	0	0
ENSG00000187815.5	ENSG00000187815	ZFP69	1	40942887	40962015	6	2865	19128	protein_coding	0.57535	3.02312	0.601163	0.0038	0	NA	0.1521	0.7326	0.207617	5	0	NA	327	0.000449563	ENSP00000361790	0	0	0	0	0	0
ENSG00000164002.7	ENSG00000164002	EXO5	1	40974413	40982228	2	2565	7815	protein_coding	0.503008	3.92929	1.09466	0.008	0.0116	0.689655	0.0961	0.4054	0.23705	4	0	NA	13	0.00061503	ENSP00000296380	0	0	0	0	0	0
ENSG00000117010.11	ENSG00000117010	ZNF684	1	40997233	41013841	5	2092	16608	protein_coding	0.707691	4.03927	3.10293	0.0051	0.0088	0.579545	NA	NA	NA	5	0	0.03	321	0.000684118	ENSP00000361784	0	0	0	0	0	0
ENSG00000117016.5	ENSG00000117016	RIMS3	1	41086351	41131329	8	7227	44978	protein_coding	0.972652	69.8084	764.641	0	0.0049	0	0.0086	0.5777	0.0148866	0	0.044	0.232	2	0.00502144	ENSP00000361768	0	0	0	0	0	0
ENSG00000066136.15	ENSG00000066136	NFYC	1	41157320	41237275	10	2353	79955	protein_coding	0.359068	18.4968	42.9032	0	0.0078	0	0.0029	0.3344	0.00867225	0	0	0.057	946	0.00299933	ENSP00000396620	0	0	0	0	0	0
ENSG00000117013.10	ENSG00000117013	KCNQ4	1	41249684	41306124	14	4085	56440	protein_coding	0.786504	13.7248	22.3242	0.0006	0.0114	0.0526316	0.0144	0.5628	0.0255864	0	0.036	0.126	NA	0.00166409	NA	1	0	0	0	0	0
ENSG00000179862.5	ENSG00000179862	CITED4	1	41326729	41328018	1	1289	1289	protein_coding	0.672743	34.5228	1057.62	0.0475	0.1102	0.431034	0.1451	0.8862	0.163733	2	0	0.414	NA	0.00667892	NA	0	0	0	0	0	0
ENSG00000171793.9	ENSG00000171793	CTPS1	1	41445007	41478235	19	3180	33228	protein_coding	0.609628	20.2238	182.154	0.0016	0.0065	0.246154	0.0106	0.4364	0.0242896	0	0	NA	574	0.00285318	ENSP00000361699	0	0	0	0	0	0
ENSG00000171790.11	ENSG00000171790	SLFNL1	1	41481269	41488909	4	4306	7640	protein_coding	0.986653	47.2889	242.049	0.0031	0.0421	0.0736342	0.1503	0.9323	0.161214	2	0	0.093	NA	0.00553753	NA	0	0	0	0	0	0
ENSG00000010803.12	ENSG00000010803	SCMH1	1	41492872	41707826	16	3330	214954	protein_coding	0.490414	30.1871	68.5737	0	0.0046	0	0.0321	0.2955	0.108629	0	0	0.08	20	0.0041603	ENSP00000318094	0	0	0	0	0	0
ENSG00000204060.4	ENSG00000204060	FOXO6	1	41827594	41849262	2	2396	21668	protein_coding	0.884682	12.2553	31.1289	NA	NA	NA	0.1357	1.006	0.134891	0	0	NA	3	0.00197991	ENSP00000361672	0	0	0	0	0	0
ENSG00000127129.5	ENSG00000127129	EDN2	1	41944446	41950344	5	1236	5898	protein_coding	0.899556	21.4642	2176.7	0.0026	0	NA	0.1928	0.6039	0.319258	2	0	NA	NA	0.00419916	NA	0	0	0	0	0	0
ENSG00000127124.9	ENSG00000127124	HIVEP3	1	41972036	42501596	8	12311	529560	protein_coding	0.709453	3.39974	2.09906	0.0049	0.015	0.326667	0.1022	0.5356	0.190814	0	0	0.02	323	0.000104801	ENSP00000247584	0	0	0	0	0	0
ENSG00000044012.3	ENSG00000044012	GUCA2B	1	42619092	42621495	3	594	2403	protein_coding	0.983531	99.7699	12490.9	0.0084	0.0124	0.677419	0.222	1.2829	0.173045	3	0	NA	2	0.0216938	ENSP00000361662	0	0	0	0	0	0
ENSG00000197273.3	ENSG00000197273	GUCA2A	1	42628362	42630389	3	566	2027	protein_coding	0.990103	708.48	429849	0.0076	0.0131	0.580153	0.2183	0.6918	0.315554	3	0.031	NA	1	0.15462	ENSP00000349493	0	0	0	0	0	0
ENSG00000198815.4	ENSG00000198815	FOXJ3	1	42642210	42801548	15	5337	159338	protein_coding	0.296725	15.0369	15.8769	0.0008	0.009	0.0888889	0.0268	0.2492	0.107544	0	0	0	4	0.00147877	ENSP00000354620	0	0	0	0	0	0
ENSG00000177181.10	ENSG00000177181	RIMKLA	1	42846466	42888249	5	8904	41783	protein_coding	0.932081	6.49009	8.34074	0	0.0191	0	0.057	0.5806	0.0981743	NA	0	0.235	1	0.000353022	ENSP00000414330	0	0	0	0	0	0
ENSG00000066185.8	ENSG00000066185	ZMYND12	1	42896000	42921938	8	1767	25938	protein_coding	0.966347	26.7037	101.125	0.004	0.0124	0.322581	0.1031	0.4818	0.213989	1	0.034	0.174	NA	0.00477299	NA	0	0	0	0	0	0
ENSG00000127125.7	ENSG00000127125	PPCS	1	42921788	42939056	2	1615	17268	protein_coding	0.385478	27.822	122.701	0.0111	0	NA	0.0674	0.4921	0.136964	0	0.027	0.008	20	0.00509717	ENSP00000361642	0	0	0	0	0	0
ENSG00000186409.10	ENSG00000186409	CCDC30	1	42929001	43120335	5	6822	191334	protein_coding	0.819013	3.42625	4.33373	0.0053	0.0047	1.12766	0.4761	1.4174	0.335897	3	0	0.065	NA	0.000263991	NA	0	0	0	0	0	0
ENSG00000171960.6	ENSG00000171960	PPIH	1	43124096	43142429	7	1304	18333	protein_coding	0.69924	19.0082	11.7311	0	0.006	0	0.0727	0.5151	0.141138	3	0	0.026	307	0.00366906	ENSP00000306614	0	0	0	0	0	0
ENSG00000065978.13	ENSG00000065978	YBX1	1	43148098	43168020	7	1517	19922	protein_coding	0.654065	592.276	29254.2	0.006	0.0068	0.882353	0.0045	0.1203	0.0374065	0	0	0	89	0.110332	ENSP00000361626	0	1	0	0	0	0
ENSG00000164007.6	ENSG00000164007	CLDN19	1	43198764	43205925	3	3514	7161	protein_coding	0.995468	73.7903	1349.02	0.0068	0.0447	0.152125	0.021	0.6318	0.0332384	0	0	NA	NA	0.00985944	NA	1	0	0	0	0	0
ENSG00000117385.11	ENSG00000117385	LEPRE1	1	43212006	43232755	2	2999	20749	protein_coding	0.647048	32.9726	84.3902	0.0032	0.0051	0.627451	0.0889	0.5724	0.155311	0	0.003	0.131	5	0.00480392	ENSP00000296388	1	0	0	0	0	0
ENSG00000164008.9	ENSG00000164008	C1orf50	1	43232940	43263968	9	1549	31028	protein_coding	0.634106	7.2515	1.37817	0.0027	0.0047	0.574468	0.092	0.446	0.206278	0	0	0.174	1	0.001344	ENSP00000361603	0	0	0	0	0	0
ENSG00000177868.7	ENSG00000177868	CCDC23	1	43272723	43282954	3	705	10231	protein_coding	0.701593	26.5802	23.8566	0	0	NA	0.0324	0.5848	0.0554036	NA	0.006	0.525	NA	0.00567611	NA	0	0	0	0	0	0
ENSG00000164010.9	ENSG00000164010	ERMAP	1	43282795	43310660	9	3940	27865	protein_coding	0.543883	9.43003	8.03463	0.0032	0.0148	0.216216	0.1553	0.5594	0.277619	4	0.011	0.02	49	0.00117345	ENSP00000361592	0	0	0	0	0	0
ENSG00000164011.13	ENSG00000164011	ZNF691	1	43312280	43318148	5	1930	5868	protein_coding	0.442144	8.44043	6.26493	0.0015	0.0057	0.263158	0.0729	0.5254	0.138751	3	0	0.04	323	0.00146832	ENSP00000380237	0	0	0	0	0	0
ENSG00000117394.15	ENSG00000117394	SLC2A1	1	43391052	43424530	10	3308	33478	protein_coding	0.904673	246.091	14996.9	0.012	0.0303	0.39604	0.0156	0.6669	0.0233918	0	0.007	0	117	0.034013	ENSP00000416293	1	1	0	0	0	0
ENSG00000186973.6	ENSG00000186973	FAM183A	1	43610824	43622067	4	526	11243	protein_coding	0.925461	15.5589	1059	0	0	NA	0.1404	0.5959	0.23561	2	0	NA	NA	0.00342968	NA	0	0	0	0	0	0
ENSG00000117395.6	ENSG00000117395	EBNA1BP2	1	43629846	43736607	10	1493	106761	protein_coding	0.538059	28.5356	227.022	0	0.0177	0	0.0777	0.6501	0.11952	0	0.024	0.071	630	0.00533288	ENSP00000407323	0	0	0	0	0	0
ENSG00000243710.3	ENSG00000243710	WDR65	1	43637820	43720029	23	4221	82209	protein_coding	0.974271	14.5071	33.0052	0.0033	0.0123	0.268293	0.1426	0.5552	0.256844	NA	0.098	0.055	1	0.00172178	ENSP00000435310	0	0	0	0	0	0
ENSG00000179178.6	ENSG00000179178	TMEM125	1	43735665	43739673	4	1846	4008	protein_coding	0.866654	41.4789	540.793	0	0	NA	0.093	0.6324	0.147059	0	0	NA	5	0.00732163	ENSP00000429275	0	0	0	0	0	0
ENSG00000253313.1	ENSG00000253313	C1orf210	1	43747554	43751288	3	1475	3734	protein_coding	0.804124	18.646	216.436	0	0.0114	0	0.1776	0.5701	0.311524	NA	0	NA	NA	0.00349087	NA	0	0	0	0	0	0
ENSG00000066056.9	ENSG00000066056	TIE1	1	43766664	43788779	23	3859	22115	protein_coding	0.708567	23.5674	101.394	0.0016	0.0129	0.124031	0.0364	0.5334	0.0682415	0	0	0.029	744	0.00297666	ENSP00000361554	0	1	0	0	0	0
ENSG00000117400.10	ENSG00000117400	MPL	1	43803478	43818443	12	1938	14965	protein_coding	0.809675	0.65783	0.0935475	NA	NA	NA	0.1089	0.3713	0.293294	2	0	0.108	NA	0.000114321	NA	1	0	0	0	0	0
ENSG00000117399.9	ENSG00000117399	CDC20	1	43824626	43828874	10	1767	4248	protein_coding	0.922438	47.9592	829.624	0.0079	0.0172	0.459302	0.0269	0.5177	0.0519606	0	0	0	397	0.00858066	ENSP00000308450	0	1	0	0	0	0
ENSG00000066322.8	ENSG00000066322	ELOVL1	1	43829068	43833696	8	1469	4628	protein_coding	0.709763	104.711	2631.43	0.0018	0.0041	0.439024	0.0414	0.4375	0.0946286	0	0	0.022	29	0.0197262	ENSP00000361536	0	0	0	0	0	0
ENSG00000159479.12	ENSG00000159479	MED8	1	43849588	43855479	7	1917	5891	protein_coding	0.416108	27.4992	26.4653	0.0054	0	NA	0.0178	0.3936	0.0452236	0	0	0.164	132	0.0047946	ENSP00000290663	0	0	0	0	0	0
ENSG00000198198.9	ENSG00000198198	SZT2	1	43855553	43918321	71	12210	62768	protein_coding	0.55745	11.486	6.00653	0.002	0.0095	0.210526	0.0424	0.4417	0.0959928	0	0.026	NA	NA	0.000360495	NA	0	1	0	0	0	0
ENSG00000178922.12	ENSG00000178922	HYI	1	43916824	43919660	6	2167	2836	protein_coding	0.500176	21.9759	53.3236	0	0.0203	0	0.0686	0.6088	0.112681	0	0	0.028	28	0.0036791	ENSP00000361502	0	0	0	0	0	0
ENSG00000142949.12	ENSG00000142949	PTPRF	1	43990858	44089343	34	7693	98485	protein_coding	0.634251	48.8329	344.513	0.0009	0.0302	0.0298013	0.0199	0.6578	0.0302524	0	0	0.013	96	0.00324828	ENSP00000353030	0	0	0	0	0	0
ENSG00000066135.8	ENSG00000066135	KDM4A	1	44115829	44171186	22	4452	55357	protein_coding	0.503183	16.0622	15.269	0.0024	0.0161	0.149068	0.0318	0.609	0.0522167	0	0	0.021	3	0.00183954	ENSP00000361473	0	0	0	0	0	0
ENSG00000126091.15	ENSG00000126091	ST3GAL3	1	44171495	44396831	13	2436	225336	protein_coding	0.718611	18.83	26.7601	0.0498	0.0881	0.565267	0.016	0.3598	0.0444691	0	0	0.074	NA	0.00300609	NA	1	0	0	0	0	0
ENSG00000117407.12	ENSG00000117407	ARTN	1	44398992	44402913	5	1938	3921	protein_coding	0.806442	4.28461	14.5284	0.0059	0.0056	1.05357	0.2391	1.3665	0.174973	0	0.019	NA	NA	0.000743606	NA	0	0	0	0	0	0
ENSG00000117408.6	ENSG00000117408	IPO13	1	44412611	44433694	20	3874	21083	protein_coding	0.766587	41.8038	178.775	0	0.0038	0	0.004	0.3237	0.0123571	0	0	0.027	3	0.00525906	ENSP00000361418	0	0	0	0	0	0
ENSG00000132768.9	ENSG00000132768	DPH2	1	44435672	44439041	6	2466	3369	protein_coding	0.505327	17.1792	36.9299	NA	NA	NA	0.1021	0.5572	0.183238	0	0	0.003	168	0.00273653	ENSP00000255108	0	0	0	0	0	0
ENSG00000117410.9	ENSG00000117410	ATP6V0B	1	44440159	44443967	6	2426	3808	protein_coding	0.703843	103.2	2414.3	0.088	0.1325	0.664151	0.0231	0.4956	0.0466102	0	0	0.054	235	0.016497	ENSP00000431605	0	0	0	0	0	0
ENSG00000117411.12	ENSG00000117411	B4GALT2	1	44444615	44456840	7	2622	12225	protein_coding	0.474145	21.5712	50.5496	0.0033	0.0332	0.0993976	0.0371	0.44	0.0843182	0	0	0.006	NA	0.00334835	NA	0	0	0	0	0	0
ENSG00000159214.8	ENSG00000159214	CCDC24	1	44457031	44462200	8	2646	5169	protein_coding	0.808028	12.9832	42.5806	0.011	0.0087	1.26437	0.2597	0.5274	0.492416	4	0	0.407	NA	0.00200716	NA	0	0	0	0	0	0
ENSG00000196517.7	ENSG00000196517	SLC6A9	1	44457172	44497139	14	3116	39967	protein_coding	0.828926	21.9943	157.553	0.0036	0.0077	0.467532	0.0215	0.6783	0.0316969	0	0.059	0.003	1	0.00314075	ENSP00000353791	0	1	0	0	0	0
ENSG00000171872.4	ENSG00000171872	KLF17	1	44584522	44600812	4	3127	16290	protein_coding	0.98772	10.7941	12.2834	0.0095	0.01	0.95	0.4144	0.5973	0.693789	5	0	NA	322	0.001539	ENSP00000361373	0	0	0	0	0	0
ENSG00000178028.9	ENSG00000178028	DMAP1	1	44679127	44686353	7	4545	7226	protein_coding	0.43084	19.4614	81.7549	0	0.0143	0	0.0108	0.5624	0.0192034	0	0	0.113	24	0.00219374	ENSP00000312697	0	1	0	0	0	0
ENSG00000117419.10	ENSG00000117419	ERI3	1	44686742	44820932	9	1675	134190	protein_coding	0.644306	45.279	88.0986	0	0	NA	0.0098	0.2371	0.0413328	1	0.004	0.005	5	0.00822316	ENSP00000361331	0	0	0	0	0	0
ENSG00000187147.13	ENSG00000187147	RNF220	1	44870866	45117396	6	3829	246530	protein_coding	0.535456	14.693	94.7918	0.0024	0.018	0.133333	0.0096	0.3503	0.0274051	0	0.042	0	NA	0.0018634	NA	0	0	0	0	0	0
ENSG00000126106.9	ENSG00000126106	TMEM53	1	45100910	45140227	3	2307	39317	protein_coding	0.808906	16.662	37.1315	0.0017	0.0185	0.0918919	0.0766	0.7022	0.109086	NA	0	0.181	1	0.00272835	ENSP00000361311	0	0	0	0	0	0
ENSG00000198520.6	ENSG00000198520	C1orf228	1	45140364	45191263	10	2103	50899	protein_coding	0.896859	12.6286	22.0585	0.001	0.0216	0.0462963	0.1468	0.5804	0.252929	0	0.06	0.083	NA	0.00212972	NA	0	0	0	0	0	0
ENSG00000142945.8	ENSG00000142945	KIF2C	1	45205490	45233439	20	2935	27949	protein_coding	0.976618	73.2838	354.779	0.0026	0.0049	0.530612	0.0641	0.4377	0.146447	0	0	0	173	0.010785	ENSP00000361298	0	0	0	0	0	0
ENSG00000142937.7	ENSG00000142937	RPS8	1	45240923	45244451	5	1110	3528	protein_coding	0.706332	1084.92	82217.5	0	0.005	0	0	0.6259	0	0	0	0.068	698	0.215412	ENSP00000379888	0	0	0	0	0	0
ENSG00000142959.4	ENSG00000142959	BEST4	1	45249257	45253377	9	2038	4120	protein_coding	0.969799	29.3437	815.472	0	0.0154	0	NA	NA	NA	0	0	0.042	NA	0.00500641	NA	0	0	0	0	0	0
ENSG00000173846.8	ENSG00000173846	PLK3	1	45265897	45271662	15	2477	5765	protein_coding	0.620995	18.1609	184.564	0.0023	0.008	0.2875	0.0329	0.5233	0.0628702	0	0	0	276	0.00289032	ENSP00000361275	0	0	0	0	0	0
ENSG00000188396.2	ENSG00000188396	TCTEX1D4	1	45271585	45272957	2	1260	1372	protein_coding	0.765756	2.31504	4.12423	0.0058	0.0414	0.140097	0.2027	0.9074	0.223385	NA	0	0	3	0.00045131	ENSP00000341803	0	0	0	0	0	0
ENSG00000222009.4	ENSG00000222009	BTBD19	1	45274154	45281257	4	2655	7103	protein_coding	0.655853	10.2165	17.1558	0.0048	0.0259	0.185328	0.0599	0.61	0.0981967	NA	0	0.062	1	0.00157249	ENSP00000395461	0	0	0	0	0	0
ENSG00000117425.9	ENSG00000117425	PTCH2	1	45285516	45308735	23	4275	23219	protein_coding	0.873627	23.572	457.597	0.0035	0.0247	0.1417	0.0462	0.4567	0.10116	0	0.049	0.115	NA	0.00277722	NA	1	0	0	0	0	0
ENSG00000070785.12	ENSG00000070785	EIF2B3	1	45316450	45452282	12	1647	135832	protein_coding	0.498951	14.7036	13.3509	0.0012	0.0064	0.1875	0.043	0.3823	0.112477	0	0	0.027	173	0.00268093	ENSP00000353575	1	0	0	0	0	0
ENSG00000126107.10	ENSG00000126107	HECTD3	1	45468212	45477001	21	3589	8789	protein_coding	0.553879	30.8814	146.788	0.0005	0.0122	0.0409836	0.0107	0.4805	0.0222685	0	0	0.007	201	0.00407685	ENSP00000361245	0	0	0	0	0	0
ENSG00000126088.8	ENSG00000126088	UROD	1	45477819	45481247	7	1841	3428	protein_coding	0.640555	54.3789	70.6363	0.0014	0.0087	0.16092	0.038	0.3602	0.105497	0	0.076	0.177	224	0.00960552	ENSP00000246337	1	1	0	0	0	0
ENSG00000162415.6	ENSG00000162415	ZSWIM5	1	45482071	45771881	14	5805	289810	protein_coding	0.826839	10.3491	6.24105	0.0008	0.0066	0.121212	0.0191	0.3283	0.0581785	0	0.028	0.144	NA	0.000939212	NA	0	0	0	0	0	0
ENSG00000186603.4	ENSG00000186603	HPDL	1	45792545	45794347	1	1802	1802	protein_coding	0.872502	4.98418	5.92251	0.0013	0.0064	0.203125	0.1301	1.0053	0.129414	0	0	0.001	51	0.000885064	ENSP00000335060	0	0	0	0	0	0
ENSG00000132781.13	ENSG00000132781	MUTYH	1	45794835	45806142	16	1913	11307	protein_coding	0.463172	10.6071	10.5729	0.0034	0.0089	0.382022	0.1366	0.5258	0.259795	0	NA	NA	48	0.00184933	ENSP00000361170	1	0	0	0	0	0
ENSG00000132773.7	ENSG00000132773	TOE1	1	45805342	45809647	8	2381	4305	protein_coding	0.647778	14.2162	11.3558	0.0037	0.007	0.528571	0.1039	0.4311	0.241011	0	0.008	0.022	6	0.00229147	ENSP00000361162	0	0	0	0	0	0
ENSG00000070759.12	ENSG00000070759	TESK2	1	45809555	45956872	11	3063	147317	protein_coding	0.61215	6.18587	9.44425	0.0009	0.0095	0.0947368	0.0647	0.4091	0.158152	0	0	0.09	724	0.000891536	ENSP00000361158	0	0	0	0	0	0
ENSG00000236624.4	ENSG00000236624	CCDC163P	1	45959538	45965751	6	2223	6213	protein_coding	0.632273	4.16318	9.37837	NA	NA	NA	0.6404	1.8085	0.354106	NA	0.663	0.73	NA	0.000689221	NA	0	0	0	0	0	0
ENSG00000132763.10	ENSG00000132763	MMACHC	1	45965725	45976739	4	2977	11014	protein_coding	0.674863	4.68141	6.45747	0.0017	0.017	0.1	0.0953	0.4941	0.192876	0	0.055	0.043	1	0.000683787	ENSP00000383840	1	0	0	0	0	0
ENSG00000117450.9	ENSG00000117450	PRDX1	1	45976708	45988719	6	1227	12011	protein_coding	0.61159	349.554	17132.5	0	0.0099	0	0.0285	0.3669	0.0776778	0	0	0.069	499	0.0684611	ENSP00000262746	0	0	1	0	0	0
ENSG00000117448.9	ENSG00000117448	AKR1A1	1	46016215	46035721	10	1808	19506	protein_coding	0.530975	51.0206	976.32	0.0014	0.0134	0.104478	0.0356	0.5052	0.0704671	0	0.025	0.071	169	0.00905485	ENSP00000312606	0	0	0	0	0	0
ENSG00000132780.12	ENSG00000132780	NASP	1	46049518	46084566	9	3650	35048	protein_coding	0.641641	47.2996	86.5081	0.0007	0.0021	0.333333	0.1091	0.3324	0.328219	0	0	0.013	262	0.00617747	ENSP00000255120	0	1	0	0	0	0
ENSG00000159588.10	ENSG00000159588	CCDC17	1	46085716	46089729	7	2981	4013	protein_coding	0.947786	35.5808	4872.04	0.0056	0.0153	0.366013	0.2501	0.7454	0.335525	0	0.048	0.029	NA	0.00519799	NA	0	0	0	0	0	0
ENSG00000159592.6	ENSG00000159592	GPBP1L1	1	46092976	46153785	13	3723	60809	protein_coding	0.436711	26.1363	38.7112	0.001	0.0141	0.070922	0.0549	0.4098	0.133968	0	0.05	0.025	NA	0.00336748	NA	0	0	0	0	0	0
ENSG00000159596.6	ENSG00000159596	TMEM69	1	46152886	46160115	3	2436	7229	protein_coding	0.765446	42.7758	47.1848	0.006	0.0134	0.447761	0.207	0.3519	0.588235	0	0.004	0.027	NA	0.00684364	NA	0	0	0	0	0	0
ENSG00000197429.6	ENSG00000197429	IPP	1	46159996	46216322	9	3104	56326	protein_coding	0.636655	5.98121	1.22231	0.0151	0.0337	0.448071	0.0308	0.4344	0.0709024	0	0.059	0.029	15	0.000855424	ENSP00000379739	0	0	0	0	0	0
ENSG00000086015.16	ENSG00000086015	MAST2	1	46252659	46501796	29	5709	249137	protein_coding	0.661875	49.5324	306.542	0.0023	0.0131	0.175573	0.0682	0.4243	0.160735	0	NA	NA	25	0.00458651	ENSP00000354671	0	0	0	0	0	0
ENSG00000117461.10	ENSG00000117461	PIK3R3	1	46505812	46642160	10	5599	136348	protein_coding	0.752591	24.2852	124.201	0.0008	0.0104	0.0769231	0.018	0.4014	0.044843	0	0	0.1	10	0.00229323	ENSP00000262741	0	0	0	0	0	0
ENSG00000117472.5	ENSG00000117472	TSPAN1	1	46640745	46651630	9	1606	10885	protein_coding	0.930523	246.819	50544.1	0.0021	0.0046	0.456522	0.1904	0.426	0.446948	0	0	0.09	1	0.0453558	ENSP00000361072	0	0	0	0	0	0
ENSG00000085998.9	ENSG00000085998	POMGNT1	1	46654354	46685977	19	3461	31623	protein_coding	0.544677	27.9941	66.126	0.002	0.0058	0.344828	0.0346	0.4498	0.0769231	0	0.035	0.266	NA	0.00377391	NA	1	1	0	0	0	0
ENSG00000171357.5	ENSG00000171357	LURAP1	1	46669006	46686933	2	1852	17927	protein_coding	0.876925	16.6101	24.6286	0.0019	0	NA	0.0813	0.4939	0.164608	0	0.109	NA	NA	0.00292573	NA	0	0	0	0	0	0
ENSG00000085999.7	ENSG00000085999	RAD54L	1	46713360	46744145	18	3090	30785	protein_coding	0.936943	13.2454	14.4273	0.0026	0.0062	0.419355	0.0286	0.4194	0.0681927	0	0.009	0.031	947	0.00189264	ENSP00000361043	1	0	0	0	0	0
ENSG00000132128.12	ENSG00000132128	LRRC41	1	46726868	46769280	8	4447	42412	protein_coding	0.321225	15.4903	18.5579	0	0.0024	0	0.0218	0.3235	0.0673879	1	0	0	NA	0.00177247	NA	0	0	0	0	0	0
ENSG00000173660.7	ENSG00000173660	UQCRH	1	46769303	46782448	2	685	13145	protein_coding	0.665739	108.201	1146.23	0.0064	0.0161	0.397516	0.0487	1.1572	0.0420843	0	0.007	0.022	236	0.0231228	ENSP00000309565	0	0	0	0	0	0
ENSG00000117481.6	ENSG00000117481	NSUN4	1	46805849	46830824	5	4339	24975	protein_coding	0.92721	36.0622	151.853	0.0014	0.0025	0.56	0.0766	0.3661	0.209232	0	NA	NA	501	0.00420313	ENSP00000419740	0	0	0	0	0	0
ENSG00000117480.11	ENSG00000117480	FAAH	1	46859937	46879520	15	2079	19583	protein_coding	0.796402	50.6	1127.64	0.003	0.019	0.157895	0.0895	0.6231	0.143637	0	0.063	0.277	85	0.00858699	ENSP00000243167	0	0	0	0	0	0
ENSG00000197587.6	ENSG00000197587	DMBX1	1	46972668	46979898	4	2878	7230	protein_coding	0.970886	1.24747	0.769137	0.0024	0.0034	0.705882	0.0263	0.6438	0.0408512	0	NA	NA	4	0.000185675	ENSP00000353132	0	1	0	0	0	0
ENSG00000162456.5	ENSG00000162456	KNCN	1	47011316	47017199	3	2317	5883	protein_coding	0.982811	1.4869	0.784918	0.02	0.0214	0.934579	0.0958	0.5738	0.166957	3	NA	NA	NA	0.000243022	NA	0	0	0	0	0	0
ENSG00000079277.15	ENSG00000079277	MKNK1	1	47023090	47082515	6	3402	59425	protein_coding	0.789154	64.6854	2812.11	NA	NA	NA	0.0362	0.5221	0.0693354	0	0.031	0.401	10	0.00880661	ENSP00000361014	0	0	0	0	0	0
ENSG00000142961.10	ENSG00000142961	MOB3C	1	47073387	47082563	3	5722	9176	protein_coding	0.368293	9.23186	16.8543	0	0.0209	0	0.0098	0.9391	0.0104355	0	0.131	NA	NA	0.00085337	NA	0	0	0	0	0	0
ENSG00000123472.8	ENSG00000123472	ATPAF1	1	47098409	47139539	9	4149	41130	protein_coding	0.645995	34.177	130.404	NA	NA	NA	0.0628	0.3366	0.186572	0	0	0.056	121	0.00411005	ENSP00000361005	0	0	0	0	0	0
ENSG00000159658.6	ENSG00000159658	EFCAB14	1	47124366	47184824	11	5756	60458	protein_coding	0.337971	30.0926	87.9678	0.0028	0.0052	0.538462	0.1061	0.3528	0.300737	0	0.008	NA	NA	0.0027672	NA	0	0	0	0	0	0
ENSG00000186118.7	ENSG00000186118	TEX38	1	47134527	47139266	2	1001	4739	protein_coding	0.998184	22.0044	57.2074	NA	NA	NA	0.1925	0.3723	0.517056	2	0.024	NA	NA	0.00446849	NA	0	0	0	0	0	0
ENSG00000142973.8	ENSG00000142973	CYP4B1	1	47223510	47285085	12	2159	61575	protein_coding	0.848917	94.9053	7404.82	0.0093	0.0094	0.989362	0.0854	0.4978	0.171555	0	0.147	0.095	36	0.0158915	ENSP00000360991	0	0	0	0	0	1
ENSG00000187048.8	ENSG00000187048	CYP4A11	1	47394849	47407156	12	2518	12307	protein_coding	0.990141	153.177	8296.4	0.0065	0.018	0.361111	0.1495	0.7075	0.211307	1	0.088	NA	36	0.0241323	ENSP00000311095	0	0	0	0	0	0
ENSG00000186377.6	ENSG00000186377	CYP4X1	1	47427036	47516423	12	2345	89387	protein_coding	0.771358	18.7633	142.378	0.0021	0.0076	0.276316	0.1813	0.3821	0.474483	0	0.029	NA	36	0.00305204	ENSP00000360968	0	0	0	0	0	0
ENSG00000186160.4	ENSG00000186160	CYP4Z1	1	47533160	47583991	12	1894	50831	protein_coding	0.908981	5.29557	118.096	0.0139	0.019	0.731579	0.4404	1.7216	0.255809	8	0.135	NA	36	0.0009276	ENSP00000334246	0	0	0	0	0	0
ENSG00000162365.7	ENSG00000162365	CYP4A22	1	47603107	47615413	12	2523	12306	protein_coding	0.993849	52.4809	1440.18	0.0086	0.0056	1.53571	0.173	0.788	0.219543	NA	0.116	NA	37	0.00827378	ENSP00000360958	0	0	0	0	0	0
ENSG00000162366.3	ENSG00000162366	PDZK1IP1	1	47649265	47656716	4	842	7451	protein_coding	0.965815	375.658	112971	0	0.0616	0	0.0958	0.8692	0.110216	3	0.027	0.489	NA	0.078422	NA	0	0	0	0	0	0
ENSG00000162367.7	ENSG00000162367	TAL1	1	47681962	47697892	4	5004	15930	protein_coding	0.794097	9.12791	23.1901	0.0013	0	NA	0.031	0.583	0.0531732	0	0.033	0.063	3	0.000951458	ENSP00000294339	0	1	0	0	0	0
ENSG00000123473.11	ENSG00000123473	STIL	1	47715811	47779819	18	5207	64008	protein_coding	0.923965	8.74649	4.37394	0.0074	0.0099	0.747475	0.1498	0.5055	0.29634	0	0.095	0	43	0.000881515	ENSP00000360944	0	1	0	0	0	0
ENSG00000162368.9	ENSG00000162368	CMPK1	1	47799469	47844511	6	2924	45042	protein_coding	0.383794	57.7856	206.834	0.0042	0.0103	0.407767	0.0424	0.3402	0.124633	0	0.017	0.083	198	0.00852001	ENSP00000360939	0	0	0	0	0	0
ENSG00000186790.4	ENSG00000186790	FOXE3	1	47881744	47883723	1	1979	1979	protein_coding	0.960427	1.03317	0.236553	NA	NA	NA	0.079	1.0931	0.0722715	0	NA	NA	3	0.000177733	ENSP00000334472	0	0	0	0	0	0
ENSG00000186564.5	ENSG00000186564	FOXD2	1	47901689	47906363	1	4674	4674	protein_coding	0.916251	6.10826	8.23455	NA	NA	NA	0.029	0.4724	0.0613887	0	0	0	3	0.000672748	ENSP00000335493	0	0	0	0	0	0
ENSG00000269113.3	ENSG00000269113	TRABD2B	1	48226200	48462567	7	7027	236367	protein_coding	0.887783	30.384	144.984	NA	NA	NA	0.0631	0.8016	0.0787176	NA	NA	NA	NA	0.00226114	NA	0	0	0	0	0	0
ENSG00000269709.1	ENSG00000269709	AL109659.1	1	48569306	48569878	1	572	572	protein_coding	0.820365	0.0790753	0.012948	NA	NA	NA	NA	NA	NA	NA	NA	NA	NA	1.73e-05	NA	0	0	0	0	0	0
ENSG00000117834.8	ENSG00000117834	SLC5A9	1	48688357	48714316	12	3757	25959	protein_coding	0.974068	37.2502	910.267	0.011	0.048	0.229167	0.0738	0.639	0.115493	0	0.269	0.021	2	0.00478532	ENSP00000236495	0	0	0	0	0	0
ENSG00000132122.7	ENSG00000132122	SPATA6	1	48761044	48937845	13	4960	176801	protein_coding	0.915233	35.9866	153.334	0.0009	0.0076	0.118421	0.0476	0.2672	0.178144	0	0.064	0.034	NA	0.00377926	NA	0	0	0	0	0	0
ENSG00000186094.12	ENSG00000186094	AGBL4	1	48998527	50489585	7	3931	1491058	protein_coding	0.944467	1.28995	0.374247	NA	NA	NA	0.0806	0.5563	0.144886	0	0	NA	4	0.000160766	ENSP00000360905	0	0	0	0	0	0
ENSG00000162373.8	ENSG00000162373	BEND5	1	49193195	49242641	6	1710	49446	protein_coding	0.709751	11.564	22.4922	0	0.0022	0	0.0064	0.2396	0.0267112	0	0.047	0.038	NA	0.00209346	NA	0	0	0	0	0	0
ENSG00000227839.1	ENSG00000227839	AL645730.2	1	50459990	50461874	1	1884	1884	protein_coding	0.941928	0.0240523	0.000844687	NA	NA	NA	NA	NA	NA	NA	NA	NA	NA	4.22e-06	NA	0	0	0	0	0	0
ENSG00000162374.12	ENSG00000162374	ELAVL4	1	50513686	50669458	7	3959	155772	protein_coding	0.985463	16.0705	44.8588	0	0.0118	0	0.0127	0.3271	0.038826	0	0	NA	34	0.00199712	ENSP00000349594	0	0	0	0	0	0
ENSG00000142700.7	ENSG00000142700	DMRTA2	1	50883222	50889172	3	3134	5950	protein_coding	0.956592	2.10201	0.653681	0.0008	0.0146	0.0547945	0.0249	0.8965	0.0277747	0	0.006	NA	NA	0.000298901	NA	0	0	0	0	0	0
ENSG00000185104.15	ENSG00000185104	FAF1	1	50905150	51425935	19	4348	520785	protein_coding	0.682167	26.6515	34.2516	0.0006	0.0028	0.214286	0.0165	0.2772	0.0595238	0	0.013	0.005	10	0.00310402	ENSP00000360843	0	1	0	0	0	0
ENSG00000123080.6	ENSG00000123080	CDKN2C	1	51426417	51440305	4	2900	13888	protein_coding	0.617686	14.1633	136.399	0	0	NA	0.037	0.24	0.154167	1	0.034	0.019	41	0.00210154	ENSP00000262662	0	0	0	0	0	0
ENSG00000204006.4	ENSG00000204006	C1orf185	1	51567906	51613752	5	904	45846	protein_coding	0.999672	16.5147	52.901	0.0063	0.0179	0.351955	0.3131	0.5593	0.559807	2	0	NA	NA	0.003406	NA	0	0	0	0	0	0
ENSG00000123091.4	ENSG00000123091	RNF11	1	51701943	51739127	3	3081	37184	protein_coding	0.665263	99.5882	1049.68	0	0	NA	0.003	0.1131	0.0265252	0	0	0.001	43	0.0143023	ENSP00000242719	0	0	0	0	0	0
ENSG00000085831.11	ENSG00000085831	TTC39A	1	51752930	51810788	11	6276	57858	protein_coding	0.925226	15.8429	17.2904	0.01	0.037	0.27027	0.039	0.5798	0.0672646	0	0.018	0.014	NA	0.00133193	NA	0	0	0	0	0	0
ENSG00000085832.12	ENSG00000085832	EPS15	1	51819935	51985000	25	5200	165065	protein_coding	0.560853	32.1722	112.765	0.0021	0.0106	0.198113	0.0573	0.3205	0.178783	0	0.342	0.076	34	0.00324776	ENSP00000360798	0	0	0	0	0	0
ENSG00000117859.14	ENSG00000117859	OSBPL9	1	52042851	52254889	8	4512	212038	protein_coding	0.526029	32.9299	137.501	0.0161	0.0506	0.318182	0.0115	0.3651	0.0314982	0	0	0.014	11	0.00372165	ENSP00000412733	0	0	0	0	0	0
ENSG00000078618.15	ENSG00000078618	NRD1	1	52254863	52344477	33	3862	89614	protein_coding	0.637119	65.2204	525.782	0.0008	0.013	0.0615385	0.0345	0.3552	0.0971284	0	0	0.096	13	0.00821955	ENSP00000346890	0	1	0	0	0	0
ENSG00000169213.6	ENSG00000169213	RAB3B	1	52373628	52456436	5	12839	82808	protein_coding	0.959272	11.6285	68.723	0.0023	0.0101	0.227723	0.0121	0.6558	0.0184507	0	0	NA	43	0.00032743	ENSP00000360718	0	0	0	0	0	0
ENSG00000117862.7	ENSG00000117862	TXNDC12	1	52485803	52521843	7	2389	36040	protein_coding	0.405548	32.7178	116.753	0	0.0059	0	0.0683	0.4796	0.14241	NA	NA	NA	7	0.0052698	ENSP00000360688	0	0	0	0	0	0
ENSG00000134717.13	ENSG00000134717	BTF3L4	1	52521797	52556388	6	4697	34591	protein_coding	0.362938	10.082	11.3209	0	0.0069	0	0	0.2954	0	0	0	0.01	315	0.00110782	ENSP00000360664	0	0	0	0	0	0
ENSG00000157077.10	ENSG00000157077	ZFYVE9	1	52608046	52812358	19	4895	204312	protein_coding	0.502853	11.8282	30.7551	0.0033	0.0104	0.317308	0.0122	0.34	0.0358824	0	0.017	0.013	24	0.00125226	ENSP00000287727	0	0	0	0	0	0
ENSG00000154222.10	ENSG00000154222	CC2D1B	1	52811395	52831865	24	5614	20470	protein_coding	0.472539	16.0695	11.4364	0.0011	0.008	0.1375	0.1239	0.4711	0.263001	NA	0.081	0.474	NA	0.00151559	NA	0	0	0	0	0	0
ENSG00000085840.8	ENSG00000085840	ORC1	1	52838501	52870131	17	3140	31630	protein_coding	0.945574	12.4885	19.9575	0.0063	0.0102	0.617647	0.2151	0.6024	0.357072	0	NA	NA	500	0.00177739	ENSP00000360621	1	0	0	0	0	0
ENSG00000134748.12	ENSG00000134748	PRPF38A	1	52870236	52886511	10	5264	16275	protein_coding	0.460935	15.8383	11.6846	0	0.0092	0	0.0056	0.6964	0.00804136	0	0.013	0.072	108	0.00157671	ENSP00000257181	0	0	0	0	0	0
ENSG00000134744.9	ENSG00000134744	ZCCHC11	1	52873954	53019159	30	5828	145205	protein_coding	0.554872	12.4379	13.6639	0.0022	0.0067	0.328358	0.0599	0.3622	0.165378	0	0.028	0.064	40	0.00112637	ENSP00000257177	0	0	0	0	0	0
ENSG00000116157.5	ENSG00000116157	GPX7	1	53068044	53074723	3	1225	6679	protein_coding	0.622353	10.7663	17.8667	0	0.0421	0	0.054	0.5264	0.102584	0	0.037	0.543	100	0.00211322	ENSP00000354677	0	0	0	0	0	0
ENSG00000182183.10	ENSG00000182183	FAM159A	1	53099016	53135355	6	1986	36339	protein_coding	0.897121	2.16465	3.49537	0.0048	0.0145	0.331034	0.1488	0.5731	0.259641	0	0	0.248	NA	0.000372287	NA	0	0	0	0	0	0
ENSG00000162377.4	ENSG00000162377	SELRC1	1	53152508	53164038	3	1617	11530	protein_coding	0.768661	13.4667	114.488	0	0.0168	0	0.0501	0.7194	0.0696414	0	0	NA	17	0.00247442	ENSP00000360593	0	0	0	0	0	0
ENSG00000162378.8	ENSG00000162378	ZYG11B	1	53192126	53293014	14	8079	100888	protein_coding	0.747648	19.548	55.5731	0	0.005	0	0.0103	0.494	0.0208502	0	0.034	0.072	5	0.00121709	ENSP00000294353	0	0	0	0	0	0
ENSG00000203995.5	ENSG00000203995	ZYG11A	1	53308183	53360670	14	4455	52487	protein_coding	0.942286	3.02027	1.7904	0.0049	0.0114	0.429825	0.1841	0.463	0.397624	2	0.001	NA	NA	0.000344885	NA	0	0	0	0	0	0
ENSG00000121310.12	ENSG00000121310	ECHDC2	1	53361656	53392884	1	5816	31228	protein_coding	0.806151	146.301	6275.72	0.0017	0.0123	0.138211	0.085	0.5302	0.160317	0	0.124	0.371	99	0.0132887	ENSP00000360577	0	0	0	0	0	0
ENSG00000116171.12	ENSG00000116171	SCP2	1	53392901	53517375	17	5187	124474	protein_coding	0.82636	66.1694	718.516	0.0016	0.0077	0.207792	0.0612	0.5398	0.113375	0	0	0.171	100	0.00669157	ENSP00000360569	0	0	0	0	0	0
ENSG00000174348.9	ENSG00000174348	PODN	1	53527854	53551174	13	3274	23320	protein_coding	0.688914	108.275	1974.86	0.0033	0.0218	0.151376	0.0402	0.7351	0.0546864	0	0.097	0.223	6	0.0150174	ENSP00000308315	0	0	0	0	0	0
ENSG00000162383.7	ENSG00000162383	SLC1A7	1	53552855	53608289	11	2626	55434	protein_coding	0.671446	4.12967	16.7589	0.0008	0.0347	0.0230548	0.0344	0.8489	0.040523	0	0.021	0.261	53	0.00063979	ENSP00000360549	0	0	0	0	0	0
ENSG00000157184.5	ENSG00000157184	CPT2	1	53662101	53679869	5	3089	17768	protein_coding	0.63547	15.7726	69.8021	0.0055	0.0062	0.887097	0.068	0.4855	0.140062	0	0	0.157	101	0.00226581	ENSP00000360541	1	0	0	0	0	0
ENSG00000162384.9	ENSG00000162384	C1orf123	1	53679771	53686289	6	1906	6518	protein_coding	0.363271	42.9958	181.978	0	0	NA	0.0336	0.4135	0.0812576	2	0.136	0.294	95	0.00751077	ENSP00000294360	0	0	0	0	0	0
ENSG00000162385.6	ENSG00000162385	MAGOH	1	53692564	53704282	5	751	11718	protein_coding	0.56406	27.1471	34.1123	0	0	NA	0	0.4751	0	0	0	0.002	322	0.00573862	ENSP00000360525	0	1	0	0	0	0
ENSG00000157193.10	ENSG00000157193	LRP8	1	53711217	53793742	19	4448	82525	protein_coding	0.897722	19.1129	200.655	0.0041	0.0233	0.175966	0.0475	0.4817	0.0986091	0	0.077	0.1	6	0.00218377	ENSP00000303634	0	0	0	0	0	0
ENSG00000143006.7	ENSG00000143006	DMRTB1	1	53925072	53933161	4	1906	8089	protein_coding	0.999853	57.7023	201.48	0.0107	0.0583	0.183533	0.2942	1.0572	0.278282	2	0.099	NA	NA	0.0100784	NA	0	0	0	0	0	0
ENSG00000174332.3	ENSG00000174332	GLIS1	1	53971910	54199877	10	2802	227967	protein_coding	0.892255	8.81006	32.4453	0.0064	0.0245	0.261224	0.0882	0.6854	0.128684	0	0.039	NA	323	0.00132532	ENSP00000309653	0	0	0	0	0	0
ENSG00000058804.10	ENSG00000058804	NDC1	1	54231133	54304533	18	5116	73400	protein_coding	0.789148	14.7914	16.7659	0.005	0.0088	0.568182	0.0678	0.4617	0.146849	0	0	NA	146	0.00151381	ENSP00000360483	0	0	0	0	0	0
ENSG00000058799.9	ENSG00000058799	YIPF1	1	54317392	54356407	11	1792	39015	protein_coding	0.605634	28.3907	342.249	0.0017	0.0033	0.515152	0.0706	0.648	0.108951	0	0	0.016	NA	0.00505578	NA	0	0	0	0	0	0
ENSG00000211452.6	ENSG00000211452	DIO1	1	54356912	54376759	4	1857	19847	protein_coding	0.981895	63.1719	2711.22	0.0062	0.0086	0.72093	NA	NA	NA	0	0	0	NA	0.0111296	NA	0	0	0	0	0	0
ENSG00000081870.7	ENSG00000081870	HSPB11	1	54382247	54411602	6	909	29355	protein_coding	0.64924	12.4053	11.5739	0.0028	0	NA	0.0855	0.4142	0.206422	3	0.037	0.018	NA	0.00255753	NA	0	0	0	0	0	0
ENSG00000116212.10	ENSG00000116212	LRRC42	1	54411750	54433841	9	2028	22091	protein_coding	0.46279	17.2006	14.3024	0.0033	0.0227	0.145374	0.0653	0.5541	0.117849	0	0	0.048	NA	0.00294382	NA	0	0	0	0	0	0
ENSG00000203985.6	ENSG00000203985	LDLRAD1	1	54474412	54483856	6	779	9444	protein_coding	0.9795	11.7082	733.561	0.0092	0.0245	0.37551	0.2083	0.8673	0.240171	2	0.035	NA	NA	0.00246602	NA	0	0	0	0	0	0
ENSG00000116209.7	ENSG00000116209	TMEM59	1	54497347	54519177	5	2468	21830	protein_coding	0.379189	74.2825	699.8	0	0.003	0	0.0317	0.3621	0.0875449	0	0.053	0	4	0.0118172	ENSP00000234831	0	0	0	0	0	0
ENSG00000116205.6	ENSG00000116205	TCEANC2	1	54519260	54578192	5	4092	58932	protein_coding	0.728269	4.12328	0.672615	0.0021	0.0068	0.308824	0.0473	0.3755	0.125965	0	0.344	NA	122	0.000499857	ENSP00000234827	0	0	0	0	0	0
ENSG00000212670.1	ENSG00000212670	AL161915.1	1	54569968	54571750	1	1782	1782	protein_coding	0.500047	2.28554	0.861797	NA	NA	NA	NA	NA	NA	NA	0	NA	NA	0.000408347	NA	0	0	0	0	0	0
ENSG00000157211.10	ENSG00000157211	CDCP2	1	54598747	54619443	4	2719	20696	protein_coding	0.87494	0.608968	0.123391	0.0069	0.0235	0.293617	0.1241	0.7442	0.166756	0	NA	NA	NA	9.29e-05	NA	0	0	0	0	0	0
ENSG00000248835.2	ENSG00000248835	AL357673.1	1	54635333	54637997	1	2664	2664	protein_coding	0.52521	4.19706	1.50098	NA	NA	NA	NA	NA	NA	NA	0	NA	NA	0.000646525	NA	0	0	0	0	0	0
ENSG00000215883.5	ENSG00000215883	CYB5RL	1	54638009	54665709	8	5635	27700	protein_coding	0.581648	1.17855	0.103502	0.0029	0.0084	0.345238	0.1195	0.7376	0.162012	2	0	0.011	112	0.000110692	ENSP00000409075	0	0	0	0	0	0
ENSG00000116221.11	ENSG00000116221	MRPL37	1	54649714	54691137	7	1575	41423	protein_coding	0.602885	61.6215	106.53	0.0045	0.0172	0.261628	0.1077	0.6235	0.172735	NA	0.091	0.078	34	0.01137	ENSP00000354086	0	0	0	0	0	0
ENSG00000157216.11	ENSG00000157216	SSBP3	1	54691105	54879152	14	2899	188047	protein_coding	0.615057	27.8602	169.994	0	0.0131	0	0	0.1771	0	0	0	0	11	0.00412977	ENSP00000360371	0	1	0	0	0	0
ENSG00000162390.13	ENSG00000162390	ACOT11	1	55007930	55104865	17	6352	96935	protein_coding	0.699609	3.4798	3.7879	0.0049	0.0278	0.176259	0.13	1.0525	0.123515	0	0.106	0.046	10	0.000289669	ENSP00000360366	0	0	0	0	0	0
ENSG00000162391.7	ENSG00000162391	FAM151A	1	55074855	55089229	8	1997	14374	protein_coding	0.986774	67.2737	5661.89	0.0244	0.0361	0.6759	0.1924	0.6409	0.300203	0	0	NA	1	0.0115782	ENSP00000306888	0	0	0	0	0	0
ENSG00000271723.1	ENSG00000271723	MROH7-TTC4	1	55107459	55207981	33	6057	100522	protein_coding	0.83867	8.60743	10.9615	0.0331	0.0516	0.641473	0.1989	0.6873	0.289393	NA	0.065	NA	NA	0.000752808	NA	0	0	0	0	0	0
ENSG00000184313.15	ENSG00000184313	MROH7	1	55107463	55175939	21	4521	68476	protein_coding	0.957117	42.7551	187.317	0.0081	0.0151	0.536424	0.1694	0.6267	0.270305	2	0.149	NA	NA	0.00483428	NA	0	0	0	0	0	0
ENSG00000243725.2	ENSG00000243725	TTC4	1	55181495	55208330	10	2385	26835	protein_coding	0.55569	4.65288	6.73947	0.0082	0.0138	0.594203	0.1025	0.4881	0.209998	NA	0.061	0	401	0.000749875	ENSP00000360329	0	0	0	0	0	0
ENSG00000162396.5	ENSG00000162396	PARS2	1	55222571	55230187	2	2345	7616	protein_coding	0.693173	5.55179	1.23978	0.002	0.0053	0.377358	0.1018	0.5969	0.170548	0	0.005	0.422	300	0.000901	ENSP00000360327	0	0	0	0	0	0
ENSG00000006555.6	ENSG00000006555	TTC22	1	55245385	55266940	7	3338	21555	protein_coding	0.932971	51.813	518.77	0.0014	0.0279	0.0501792	0.0788	1.0316	0.0763862	0	0	0.037	NA	0.00712636	NA	0	0	0	0	0	0
ENSG00000162398.7	ENSG00000162398	C1orf177	1	55271736	55307925	11	1766	36189	protein_coding	0.9559	7.97774	26.5468	0.0079	0.0235	0.33617	0.1868	0.6499	0.287429	2	0.055	0.089	NA	0.00142677	NA	0	0	0	0	0	0
ENSG00000116133.7	ENSG00000116133	DHCR24	1	55315306	55352891	9	4241	37585	protein_coding	0.944187	878.445	166207	0.0008	0.0353	0.0226629	0.014	0.6488	0.0215783	0	0	0.113	103	0.103909	ENSP00000360316	1	1	0	0	0	0
ENSG00000143001.4	ENSG00000143001	TMEM61	1	55446465	55457966	3	1094	11501	protein_coding	0.954229	38.6281	317.314	0.0077	0.0354	0.217514	NA	NA	NA	2	0.017	NA	NA	0.00771956	NA	0	0	0	0	0	0
ENSG00000162399.6	ENSG00000162399	BSND	1	55464606	55476556	4	3468	11950	protein_coding	0.991365	7.16435	20.1192	0.0138	0.025	0.552	0.1728	1.0218	0.169113	NA	NA	NA	NA	0.000963916	NA	1	1	0	0	0	0
ENSG00000169174.9	ENSG00000169174	PCSK9	1	55505221	55530525	8	3883	25304	protein_coding	0.960921	15.9432	62.1747	0.0045	0.0236	0.190678	0.1362	0.7653	0.177969	0	0	NA	366	0.00199746	ENSP00000303208	0	0	0	0	0	0
ENSG00000162402.8	ENSG00000162402	USP24	1	55532032	55680786	68	10481	148754	protein_coding	0.527795	17.2809	34.1976	0.0004	0.0104	0.0384615	0.0101	0.447	0.0225951	0	0.118	0.041	146	0.000723482	ENSP00000294383	0	0	0	0	0	0
ENSG00000162407.8	ENSG00000162407	PPAP2B	1	56960419	57110974	6	3286	150555	protein_coding	0.725391	153.765	4665.22	0.026	0.0811	0.320592	0.0232	0.716	0.0324022	0	0	0.026	5	0.021371	ENSP00000360296	0	1	0	0	0	0
ENSG00000162409.6	ENSG00000162409	PRKAA2	1	57110995	57181008	9	9338	70013	protein_coding	0.842571	13.5925	38.4899	0	0.0133	0	0.0099	0.4741	0.0208817	0	0.004	NA	45	0.000688136	ENSP00000360290	0	0	0	0	0	0
ENSG00000187889.8	ENSG00000187889	C1orf168	1	57184477	57285369	20	3115	100892	protein_coding	0.919393	8.5254	84.1826	0.011	0.0126	0.873016	0.3043	0.638	0.476959	2	0.034	NA	NA	0.00121796	NA	0	0	0	0	0	0
ENSG00000157131.10	ENSG00000157131	C8A	1	57320479	57383894	11	2345	63415	protein_coding	0.999866	179.256	3523.13	0.0032	0.013	0.246154	0.1731	0.5871	0.294839	0	0	NA	23	0.0290593	ENSP00000354458	1	0	1	1	0	0
ENSG00000021852.8	ENSG00000021852	C8B	1	57394883	57431813	13	2366	36930	protein_coding	0.999635	180.522	4081.78	0.0052	0.0135	0.385185	0.1538	0.6674	0.230447	0	0.06	NA	11	0.0292813	ENSP00000360281	1	0	1	1	0	0
ENSG00000173406.11	ENSG00000173406	DAB1	1	57460451	59012406	15	5283	1551955	protein_coding	0.897017	4.66831	13.6993	0.001	0.0052	0.192308	0.0168	0.2497	0.0672807	0	0.164	0.036	NA	0.000464554	NA	0	1	0	0	0	0
ENSG00000162600.7	ENSG00000162600	OMA1	1	58881056	59012474	9	2096	131418	protein_coding	0.43608	6.39201	4.74986	NA	NA	NA	0.1874	0.7121	0.263165	0	0.228	0.129	13	0.00108134	ENSP00000360270	0	0	0	0	0	0
ENSG00000184292.5	ENSG00000184292	TACSTD2	1	59041099	59043166	1	2067	2067	protein_coding	0.91917	714.824	149890	0.0024	0.0154	0.155844	0.1227	1.3655	0.0898572	NA	0.091	0.476	4	0.121581	ENSP00000360269	1	0	0	0	0	0
ENSG00000162601.5	ENSG00000162601	MYSM1	1	59120411	59165764	16	7777	45353	protein_coding	0.33928	11.1589	16.7329	0.0052	0.0179	0.290503	0.1186	0.4191	0.282987	0	0.064	0	298	0.000735141	ENSP00000418734	0	0	0	0	0	0
ENSG00000177606.5	ENSG00000177606	JUN	1	59246465	59249785	1	3320	3320	protein_coding	0.72464	406.225	246530	0.1176	0.2857	0.411621	0.0139	0.5946	0.0233771	0	0.049	0.093	33	0.0560232	ENSP00000360266	0	1	1	0	0	0
ENSG00000172456.12	ENSG00000172456	FGGY	1	59762310	60233347	17	2468	471037	protein_coding	0.816398	8.72313	22.6778	0.0035	0.0111	0.315315	0.0502	0.4145	0.12111	0	0.009	0.262	12	0.00138689	ENSP00000360262	0	0	0	0	0	0
ENSG00000134709.6	ENSG00000134709	HOOK1	1	60280458	60342050	22	5835	61592	protein_coding	0.887154	25.6494	62.5263	0.0006	0.0069	0.0869565	0.037	0.6697	0.0552486	0	0	0.022	4	0.00232271	ENSP00000360252	0	0	0	0	0	0
ENSG00000134716.5	ENSG00000134716	CYP2J2	1	60358980	60392462	8	2541	33482	protein_coding	0.878406	29.3163	311.142	0.0057	0.0072	0.791667	0.1475	0.759	0.194335	0	0	0.071	20	0.00460372	ENSP00000360247	0	0	0	0	0	0
ENSG00000162598.9	ENSG00000162598	C1orf87	1	60452941	60539442	6	3006	86501	protein_coding	0.962537	3.22682	20.6979	0.0037	0.0037	1	0.2352	0.5458	0.430927	2	0.01	0.507	NA	0.000469654	NA	0	0	0	0	0	0
ENSG00000162599.11	ENSG00000162599	NFIA	1	61330931	61928465	11	9476	597534	protein_coding	0.50552	12.6297	17.7617	0.0009	0.0017	0.529412	0.0058	0.2165	0.0267898	0	0.017	0	1	0.000623038	ENSP00000360231	0	1	0	0	0	0
ENSG00000162604.8	ENSG00000162604	TM2D1	1	62146718	62191095	5	3213	44377	protein_coding	0.363483	7.38886	2.31353	0.0044	0	NA	0.0807	0.4511	0.178896	NA	0	0.269	1	0.00103809	ENSP00000360222	0	0	0	0	0	0
ENSG00000132849.14	ENSG00000132849	INADL	1	62208149	62629592	43	8462	421443	protein_coding	0.527769	8.46455	24.0216	0.0047	0.0119	0.394958	0.11	0.6203	0.177334	0	0.177	0.111	32	0.000495369	ENSP00000360200	0	0	0	0	0	0
ENSG00000240563.1	ENSG00000240563	L1TD1	1	62660503	62678000	4	3845	17497	protein_coding	0.944014	4.34088	5.31487	0.0081	0.0152	0.532895	0.4605	1.4587	0.315692	NA	0.067	0.219	NA	0.000548682	NA	0	0	0	0	0	0
ENSG00000132854.14	ENSG00000132854	KANK4	1	62702651	62785085	10	4655	82434	protein_coding	0.972957	12.9069	42.7586	0.0131	0.0252	0.519841	0.1605	0.6256	0.256554	1	0	NA	8	0.00142487	ENSP00000360195	0	0	0	0	0	0
ENSG00000162607.8	ENSG00000162607	USP1	1	62901968	62917475	9	3987	15507	protein_coding	0.67685	25.6066	22.0506	0.0017	0.0085	0.2	0.0586	0.571	0.102627	0	0.053	0.023	58	0.00316075	ENSP00000343526	0	1	0	0	0	0
ENSG00000116641.11	ENSG00000116641	DOCK7	1	62920399	63153969	49	7061	233570	protein_coding	0.616914	8.84652	3.8852	0.003	0.0148	0.202703	0.0089	0.5012	0.0177574	0	0.016	0.129	66	0.000654537	ENSP00000340742	0	0	0	0	0	0
ENSG00000132855.4	ENSG00000132855	ANGPTL3	1	63063158	63071830	7	2798	8672	protein_coding	0.997886	94.6769	1411.78	0.0021	0.0023	0.913043	0.1344	0.7418	0.181181	0	0	NA	32	0.0142556	ENSP00000360170	0	0	0	0	0	0
ENSG00000269624.1	ENSG00000269624	AL138847.1	1	63073437	63075249	1	1812	1812	protein_coding	0.991322	5.53704	7.17417	NA	NA	NA	NA	NA	NA	NA	0	NA	NA	0.00098295	NA	0	0	0	0	0	0
ENSG00000125703.10	ENSG00000125703	ATG4C	1	63249806	63331184	11	2927	81378	protein_coding	0.582047	7.64218	23.1595	0	0	NA	0.0505	0.5006	0.100879	0	0.073	0.091	49	0.00112561	ENSP00000322159	0	0	0	0	0	0
ENSG00000187140.4	ENSG00000187140	FOXD3	1	63788730	63790797	1	2067	2067	protein_coding	0.969131	20.3382	89.1867	0.0018	0.0254	0.0708661	0.0408	0.7113	0.0573598	0	0	NA	3	0.00345188	ENSP00000360157	0	1	0	0	0	0
ENSG00000088035.11	ENSG00000088035	ALG6	1	63833261	63904233	15	3356	70972	protein_coding	0.451855	3.9145	1.12466	0.0039	0.0175	0.222857	0.0898	0.4433	0.202572	0	0	0	17	0.000536305	ENSP00000360149	1	0	0	0	0	0
ENSG00000142856.12	ENSG00000142856	ITGB3BP	1	63906441	64059392	10	1275	152951	protein_coding	0.718548	6.42112	1.6338	0.0048	0.0087	0.551724	0.225	0.5435	0.413983	1	0.529	0.271	NA	0.00124576	NA	0	0	0	0	0	0
ENSG00000203965.8	ENSG00000203965	EFCAB7	1	63989043	64038364	5	3790	49321	protein_coding	0.600287	4.03318	38.4459	0.0042	0.0069	0.608696	0.1448	0.5749	0.25187	0	0.03	0.027	71	0.000514184	ENSP00000360129	0	0	0	0	0	0
ENSG00000116652.5	ENSG00000116652	DLEU2L	1	64014588	64015405	2	701	817	protein_coding	0.792087	2.00967	20.0998	NA	NA	NA	NA	NA	NA	10	0	0.001	NA	0.000429195	NA	0	0	0	0	0	0
ENSG00000079739.11	ENSG00000079739	PGM1	1	64058947	64125916	11	2646	66969	protein_coding	0.90243	222.936	5310.59	0.0035	0.0128	0.273438	0.0553	0.6381	0.0866635	0	0	0.061	266	0.0344306	ENSP00000360124	1	0	0	0	0	0
ENSG00000185483.7	ENSG00000185483	ROR1	1	64239693	64647181	9	5823	407488	protein_coding	0.74418	6.34766	8.09717	0.0035	0.029	0.12069	0.0149	0.4984	0.0298957	0	0	NA	727	0.000577294	ENSP00000360120	0	1	0	0	0	0
ENSG00000177414.9	ENSG00000177414	UBE2U	1	64669310	64733051	9	1184	63741	protein_coding	0.998921	19.2435	59.7331	0.0124	0.0304	0.407895	0.3196	0.4119	0.775916	3	NA	NA	68	0.0037826	ENSP00000360116	0	0	0	0	0	0
ENSG00000158966.9	ENSG00000158966	CACHD1	1	64936428	65158741	26	5521	222313	protein_coding	0.634687	12.7914	24.4482	0.0008	0.0095	0.0842105	0.0113	0.5366	0.0210585	0	0.092	0.059	NA	0.00122376	NA	0	0	0	0	0	0
ENSG00000162437.10	ENSG00000162437	RAVER2	1	65210778	65298915	12	4386	88137	protein_coding	0.609148	4.60321	5.93775	0.0043	0.0067	0.641791	0.1263	0.6702	0.188451	0	0	0.091	NA	0.000531399	NA	0	0	0	0	0	0
ENSG00000162434.7	ENSG00000162434	JAK1	1	65298912	65432187	25	5022	133275	protein_coding	0.501141	40.3221	256.141	0.0004	0.0126	0.031746	0.0245	0.494	0.0495951	0	0	0.032	833	0.00418717	ENSP00000343204	0	1	1	0	0	0
ENSG00000162433.10	ENSG00000162433	AK4	1	65613232	65697828	6	6992	84596	protein_coding	0.7771	28.9891	680.185	0.0024	0.0085	0.282353	0.0489	0.4538	0.107757	0	0.124	0.14	234	0.00216963	ENSP00000322175	0	0	0	0	0	0
ENSG00000116675.11	ENSG00000116675	DNAJC6	1	65713902	65881552	19	5724	167650	protein_coding	0.971543	37.9845	393.605	0.002	0.0198	0.10101	0.0379	0.5041	0.0751835	0	0.03	0	520	0.00351216	ENSP00000378735	0	1	0	0	0	0
ENSG00000116678.14	ENSG00000116678	LEPR	1	65886248	66107242	20	8207	220994	protein_coding	0.733462	10.802	30.7127	0.0052	0.0122	0.42623	0.1425	0.491	0.290224	1	0.008	0.368	NA	0.000659848	NA	1	0	0	0	0	0
ENSG00000213625.4	ENSG00000213625	LEPROT	1	65886270	65901690	4	4618	15420	protein_coding	0.42497	39.0826	140.355	0.0227	0.0376	0.603723	0.0278	0.4617	0.0602123	0	0.047	0.597	15	0.00434553	ENSP00000360104	0	0	0	0	0	0
ENSG00000184588.13	ENSG00000184588	PDE4B	1	66258197	66840259	15	4531	582062	protein_coding	0.615632	8.55536	247.956	0.0008	0.012	0.0666667	0.0661	0.651	0.101536	0	0	0	1029	0.000965247	ENSP00000332116	0	0	1	0	0	0
ENSG00000118473.17	ENSG00000118473	SGIP1	1	66999066	67213982	25	7743	214916	protein_coding	0.792052	7.92125	18.3191	0.0024	0.0089	0.269663	0.0273	0.3001	0.0909697	0	0.106	0.197	1	0.000522804	ENSP00000360076	0	0	0	0	0	0
ENSG00000248458.2	ENSG00000248458	AL139147.1	1	67131547	67142710	2	1154	11163	protein_coding	0.812148	0.466863	0.240445	NA	NA	NA	NA	NA	NA	NA	NA	NA	NA	9.25e-05	NA	0	0	0	0	0	0
ENSG00000152760.5	ENSG00000152760	TCTEX1D1	1	67218142	67244470	5	1996	26328	protein_coding	0.806443	3.49018	49.5952	0.0127	0.0079	1.60759	0.3015	0.7279	0.414205	0	0.141	0.229	7	0.000600517	ENSP00000282670	0	0	0	0	0	0
ENSG00000172410.4	ENSG00000172410	INSL5	1	67263424	67266939	2	713	3515	protein_coding	0.937055	1.09273	5.99832	0.0064	0.0117	0.547009	0.2991	0.934	0.320236	4	NA	NA	NA	0.000232282	NA	0	0	0	0	0	0
ENSG00000152763.12	ENSG00000152763	WDR78	1	67278568	67390570	14	4192	112002	protein_coding	0.925907	7.41779	15.0389	NA	NA	NA	0.1434	0.6604	0.217141	0	0	0.05	NA	0.000885344	NA	0	0	0	0	0	0
ENSG00000198160.10	ENSG00000198160	MIER1	1	67390578	67454302	15	4963	63724	protein_coding	0.461519	9.58897	8.65189	0	0.0087	0	0.0473	0.5499	0.0860156	0	0.049	0	24	0.00100625	ENSP00000383820	0	0	0	0	0	0
ENSG00000116704.6	ENSG00000116704	SLC35D1	1	67465015	67519782	12	6150	54767	protein_coding	0.731573	15.0949	38.1383	0	0.0158	0	0.015	0.2443	0.0613999	0	0.019	0.129	33	0.00129995	ENSP00000235345	1	1	0	0	0	0
ENSG00000203963.7	ENSG00000203963	C1orf141	1	67557848	67697536	5	4299	139688	protein_coding	0.994564	5.69148	3.05025	0.0067	0.0132	0.507576	0.5464	0.7899	0.691733	5	0	NA	NA	0.00066692	NA	0	0	0	0	0	0
ENSG00000162594.10	ENSG00000162594	IL23R	1	67632083	67725662	11	2901	93579	protein_coding	0.980378	1.99657	2.98455	0.0054	0.0129	0.418605	0.1948	0.5922	0.328943	2	NA	0.056	NA	0.000295943	NA	0	0	1	1	0	0
ENSG00000081985.6	ENSG00000081985	IL12RB2	1	67773047	67862583	16	4024	89536	protein_coding	0.918515	3.92594	28.4007	0.0033	0.0187	0.176471	0.2273	0.4964	0.457897	2	0	0.164	NA	0.000482241	NA	0	0	0	0	0	0
ENSG00000142864.10	ENSG00000142864	SERBP1	1	67873493	67896098	8	6668	22605	protein_coding	0.692973	85.0921	102.546	0	0	NA	0.0341	0.3367	0.101277	0	0.14	0	128	0.00672008	ENSP00000360034	0	0	0	0	0	0
ENSG00000116717.7	ENSG00000116717	GADD45A	1	68150744	68154021	4	1492	3277	protein_coding	0.721952	107.343	8178.9	0	0	NA	0.0235	0.5122	0.0458805	0	0	0.03	9	0.020025	ENSP00000360025	0	0	0	0	0	0
ENSG00000172380.5	ENSG00000172380	GNG12	1	68167149	68299150	4	4400	132001	protein_coding	0.559181	57.615	212.742	0	0	NA	0.0128	0.8982	0.0142507	0	0	NA	5	0.00663852	ENSP00000360021	0	0	0	0	0	0
ENSG00000162595.4	ENSG00000162595	DIRAS3	1	68511645	68517314	4	1969	5669	protein_coding	0.934743	52.718	6398.45	0	0.006	0	NA	NA	NA	1	0	NA	43	0.00910889	ENSP00000360020	0	0	0	0	0	0
ENSG00000116729.9	ENSG00000116729	WLS	1	68564142	68698803	12	2736	134661	protein_coding	0.686401	50.4119	346.687	0.0513	0.0992	0.517137	0.0665	0.554	0.120036	0	0.011	0.586	1	0.00766574	ENSP00000346829	0	1	0	0	0	0
ENSG00000116745.6	ENSG00000116745	RPE65	1	68894505	68915642	14	2596	21137	protein_coding	0.928395	0.66572	5.36969	0	0.0115	0	0.0304	0.4045	0.0751545	0	0	NA	6	0.000103689	ENSP00000262340	1	0	0	0	0	0
ENSG00000024526.12	ENSG00000024526	DEPDC1	1	68939835	68962904	12	5319	23069	protein_coding	0.922196	5.5356	19.8498	0.0021	0	NA	0.0868	0.4027	0.215545	0	0	NA	74	0.000547801	ENSP00000412292	0	0	0	0	0	0
ENSG00000033122.14	ENSG00000033122	LRRC7	1	70034081	70617628	27	6480	583547	protein_coding	0.947895	4.01596	9.70029	0	0.0031	0	0.022	0.3974	0.0553598	NA	NA	NA	8	0.000327553	ENSP00000035383	0	0	0	0	0	0
ENSG00000066557.5	ENSG00000066557	LRRC40	1	70610488	70671303	15	2869	60815	protein_coding	0.655546	13.0329	7.13749	0.0023	0.0084	0.27381	0.0996	0.6275	0.158725	0	0.035	0.027	45	0.00193392	ENSP00000359990	0	0	0	0	0	0
ENSG00000116754.9	ENSG00000116754	SRSF11	1	70671365	70718735	11	3997	47370	protein_coding	0.35457	60.7699	310.599	0	0.0044	0	0.0216	0.5583	0.0386889	0	0.001	0.004	59	0.00749428	ENSP00000359988	0	0	0	0	0	0
ENSG00000118454.8	ENSG00000118454	ANKRD13C	1	70726271	70820417	13	4056	94146	protein_coding	0.349219	7.60872	16.8484	0.0008	0.0083	0.0963855	0.0387	0.4181	0.0925616	0	0	0.045	8	0.000928837	ENSP00000359982	0	0	0	0	0	0
ENSG00000197568.9	ENSG00000197568	HHLA3	1	70820488	70851022	3	895	30534	protein_coding	0.579597	11.1535	11.6147	0.0154	0.0106	1.45283	NA	NA	NA	4	0	0.303	NA	0.00231542	NA	0	0	0	0	0	0
ENSG00000116761.7	ENSG00000116761	CTH	1	70876901	70905534	11	2033	28633	protein_coding	0.914745	35.0344	1381.52	0.0034	0.016	0.2125	0.0865	0.7633	0.113324	0	0	0.231	64	0.00598534	ENSP00000359976	1	0	0	0	0	0
ENSG00000050628.16	ENSG00000050628	PTGER3	1	71318036	71513491	2	6980	195455	protein_coding	0.913741	30.2694	241.209	0.0472	0.0841	0.561237	0.118	1.4418	0.0818421	0	0.087	0.04	NA	0.00227142	NA	0	0	0	0	0	0
ENSG00000132485.8	ENSG00000132485	ZRANB2	1	71528974	71546980	2	3675	18006	protein_coding	0.549078	68.5308	373.803	0	0.01	0	0.0165	0.358	0.0460894	0	0.057	0.018	13	0.00890902	ENSP00000359958	0	0	0	0	0	0
ENSG00000172260.9	ENSG00000172260	NEGR1	1	71861623	72748417	7	12804	886794	protein_coding	0.761058	10.706	25.8547	0	0.0086	0	0.0249	0.4634	0.0537333	0	NA	NA	NA	0.000303794	NA	0	0	0	0	0	0
ENSG00000162620.11	ENSG00000162620	LRRIQ3	1	74491699	74663871	10	4514	172172	protein_coding	0.987348	5.88353	3.32711	0.0071	0.0022	3.22727	0.2624	1.2012	0.218448	0	0.31	0.204	6	0.000664925	ENSP00000346414	0	0	0	0	0	0
ENSG00000254685.2	ENSG00000254685	FPGT	1	74663896	74699770	4	3422	35874	protein_coding	0.343821	4.7934	4.45139	0.0101	0.0339	0.297935	0.1645	0.6142	0.267828	NA	NA	NA	NA	0.000649819	NA	0	0	0	0	0	0
ENSG00000259030.2	ENSG00000259030	FPGT-TNNI3K	1	74663919	75009666	19	7547	345747	protein_coding	0.864128	0.83415	0.208789	NA	NA	NA	0.0592	0.6402	0.0924711	NA	NA	NA	7	5.69e-05	ENSP00000450895	0	0	0	0	0	0
ENSG00000116783.10	ENSG00000116783	TNNI3K	1	74663947	75010112	27	3242	346165	protein_coding	0.939259	1.85066	1.92836	0.0023	0.0027	0.851852	0.0592	0.6402	0.0924711	0	NA	NA	7	0.000258619	ENSP00000359928	0	0	0	0	0	0
ENSG00000162621.5	ENSG00000162621	LRRC53	1	74935562	74978298	5	3854	42736	protein_coding	0.91593	0.209537	0.0661545	0.0047	0.0069	0.681159	2.2951	6.9525	0.330111	0	NA	NA	6	2.65e-05	ENSP00000294635	0	0	0	0	0	0
ENSG00000178965.9	ENSG00000178965	C1orf173	1	75033795	75139422	15	7144	105627	protein_coding	0.966161	14.421	23.9693	0.009	0.0173	0.520231	0.2773	0.9256	0.299589	0	0	NA	NA	0.00105038	NA	0	0	0	0	0	0
ENSG00000116791.9	ENSG00000116791	CRYZ	1	75171170	75199092	2	2897	27922	protein_coding	0.752859	40.4808	247.026	0.0043	0.0511	0.0841487	0.1114	0.9239	0.120576	0	0.276	0.804	60	0.00599683	ENSP00000339399	0	0	0	0	0	0
ENSG00000162623.11	ENSG00000162623	TYW3	1	75198836	75232362	6	3424	33526	protein_coding	0.63453	16.0027	21.8381	0.0034	0.0221	0.153846	0.1751	0.7718	0.226872	NA	NA	NA	21	0.00216986	ENSP00000359904	0	0	0	0	0	0
ENSG00000162624.10	ENSG00000162624	LHX8	1	75594119	75627218	10	2363	33099	protein_coding	0.977819	1.69694	1.56837	0	0.0136	0	0.0482	0.7397	0.0651616	0	NA	NA	6	0.000275155	ENSP00000294638	0	1	0	0	0	0
ENSG00000137968.12	ENSG00000137968	SLC44A5	1	75667816	76076801	24	4382	408985	protein_coding	0.815063	3.41124	9.13186	0.0224	0.0508	0.440945	0.2006	0.669	0.299851	0	0.612	0.487	20	0.000394191	ENSP00000359892	0	0	0	0	0	0
ENSG00000117054.9	ENSG00000117054	ACADM	1	76190036	76253260	12	2607	63224	protein_coding	0.732581	64.5672	679.172	0.002	0.0092	0.217391	0.0633	0.9183	0.0689317	0	0.175	0.258	162	0.0100391	ENSP00000409612	1	1	0	0	0	0
ENSG00000137955.11	ENSG00000137955	RABGGTB	1	76251879	76260764	7	3856	8885	protein_coding	0.469508	36.3846	71.3428	0	0.0144	0	0.0205	0.7167	0.0286033	0	0.073	0.037	14	0.00459342	ENSP00000317473	0	0	0	0	0	0
ENSG00000057468.6	ENSG00000057468	MSH4	1	76262567	76378923	20	3246	116356	protein_coding	0.919557	2.91225	0.461724	0.0023	0.0114	0.201754	0.0719	0.7162	0.100391	0	0.146	NA	127	0.00040653	ENSP00000263187	0	0	0	0	0	0
ENSG00000154007.6	ENSG00000154007	ASB17	1	76384558	76398116	3	1104	13558	protein_coding	0.999752	37.766	251.368	0.0015	0.005	0.3	0.0685	0.5709	0.119986	3	0.002	NA	NA	0.00754697	NA	0	0	0	0	0	0
ENSG00000184005.9	ENSG00000184005	ST6GALNAC3	1	76540404	77100286	5	6856	559882	protein_coding	0.734863	4.16729	5.12247	0.0137	0.0439	0.312073	0.0829	0.6945	0.119366	0	0.006	0.161	NA	0.000319131	NA	0	0	0	0	0	0
ENSG00000117069.10	ENSG00000117069	ST6GALNAC5	1	77333126	77531396	5	3746	198270	protein_coding	0.856419	7.88064	64.8987	0.0013	0.0049	0.265306	0.0462	0.4609	0.100239	0	0	NA	NA	0.0010128	NA	0	0	0	0	0	0
ENSG00000142892.10	ENSG00000142892	PIGK	1	77554675	77685115	11	4585	130440	protein_coding	0.551983	10.0092	5.75533	0.0012	0.0202	0.0594059	0.0547	0.7864	0.0695575	0	0.012	0.062	99	0.00111752	ENSP00000359848	0	0	0	0	0	0
ENSG00000154027.14	ENSG00000154027	AK5	1	77747736	78025651	14	3915	277915	protein_coding	0.983154	47.5115	508.555	0.0024	0.0024	1	0.0445	0.5896	0.0754749	0	0	0.517	188	0.00593549	ENSP00000346577	0	0	0	0	0	0
ENSG00000036549.8	ENSG00000036549	ZZZ3	1	78028101	78149104	10	4727	121003	protein_coding	0.500976	8.03464	10.4345	0.0014	0.0034	0.411765	0.0664	0.3952	0.168016	0	0	0.035	7	0.000876374	ENSP00000359837	0	0	0	0	0	0
ENSG00000077254.10	ENSG00000077254	USP33	1	78161672	78225537	25	4477	63865	protein_coding	0.404902	20.8195	47.4878	0.0042	0.0179	0.234637	0.0358	0.6128	0.0584204	0	0	0.06	10	0.00236667	ENSP00000350009	0	0	0	0	0	0
ENSG00000180488.10	ENSG00000180488	FAM73A	1	78245309	78344106	16	5272	98797	protein_coding	0.471353	5.0246	10.6445	0.0053	0.0171	0.309942	0.0803	0.6125	0.131102	0	0	0.113	3	0.000500287	ENSP00000359827	0	0	0	0	0	0
ENSG00000162614.14	ENSG00000162614	NEXN	1	78354198	78409580	12	3183	55382	protein_coding	0.797659	120.793	3938.13	0.0039	0.0036	1.08333	0.0572	0.7804	0.0732957	0	NA	NA	7	0.0170823	ENSP00000333938	0	0	0	0	0	0
ENSG00000162613.12	ENSG00000162613	FUBP1	1	78409740	78444794	20	2504	35054	protein_coding	0.553161	39.6643	80.1775	0	0.0019	0	0.0215	0.4459	0.0482171	0	0	0.003	49	0.0062764	ENSP00000359804	0	0	0	0	0	0
ENSG00000162616.8	ENSG00000162616	DNAJB4	1	78444859	78483648	3	2985	38789	protein_coding	0.725448	42.0821	269.941	0	0	NA	0.0285	0.4608	0.061849	0	0.008	0.079	155	0.00614296	ENSP00000359799	0	0	0	0	0	0
ENSG00000137960.5	ENSG00000137960	GIPC2	1	78445226	78604133	6	3841	158907	protein_coding	0.841347	14.3919	53.0214	0.0129	0.0323	0.399381	0.1079	0.802	0.134539	0	0.021	NA	1	0.00182173	ENSP00000359795	0	0	0	0	0	0
ENSG00000122420.5	ENSG00000122420	PTGFR	1	78769568	79005434	4	4446	235866	protein_coding	0.862314	19.1371	124.702	0.0014	0.0057	0.245614	0.0628	0.6178	0.101651	0	0	0.229	NA	0.0021845	NA	0	0	0	0	0	0
ENSG00000137959.11	ENSG00000137959	IFI44L	1	79085607	79111830	9	5865	26223	protein_coding	0.972274	96.142	1178.26	0.0102	0.0146	0.69863	0.2883	0.7454	0.386772	NA	NA	NA	28	0.00867572	ENSP00000359787	0	0	0	0	0	0
ENSG00000137965.6	ENSG00000137965	IFI44	1	79115481	79129763	9	1678	14282	protein_coding	0.888396	74.0431	722.51	0.0107	0.0189	0.566138	0.381	0.6194	0.615111	5	0.026	0.017	59	0.0134263	ENSP00000359783	0	0	0	0	0	0
ENSG00000162618.8	ENSG00000162618	ELTD1	1	79355449	79472403	15	3512	116954	protein_coding	0.824392	53.2221	747.229	0.006	0.0156	0.384615	0.1329	0.7659	0.173521	0	0	NA	9	0.00710972	ENSP00000359778	0	0	0	0	0	0
ENSG00000117114.15	ENSG00000117114	LPHN2	1	81771845	82458120	25	6277	686275	protein_coding	0.762429	30.7752	193.326	0.0014	0.0063	0.222222	0.0213	0.6402	0.0332709	0	0.242	NA	41	0.00259599	ENSP00000322270	0	0	0	0	0	0
ENSG00000137941.12	ENSG00000137941	TTLL7	1	84330711	84464833	28	8424	134122	protein_coding	0.761521	13.7874	74.5181	0.0006	0.009	0.0666667	0.0646	0.5535	0.116712	0	0	0	87	0.000813183	ENSP00000260505	0	0	0	0	0	0
ENSG00000142875.15	ENSG00000142875	PRKACB	1	84543745	84704181	10	4503	160436	protein_coding	0.890383	52.5192	509.229	0	0.0026	0	0.0427	0.7542	0.0566163	0	0.011	0.006	1428	0.00594773	ENSP00000359719	0	0	1	0	0	0
ENSG00000203943.4	ENSG00000203943	SAMD13	1	84764049	84855640	4	1561	91591	protein_coding	0.904819	5.04244	4.15441	0.0193	0.0373	0.517426	0.0266	0.3676	0.0723613	0	0.017	0.022	NA	0.000932448	NA	0	0	0	0	0	0
ENSG00000137976.7	ENSG00000137976	DNASE2B	1	84864215	84880701	6	1263	16486	protein_coding	0.973163	5.88043	100.047	0.0013	0.0223	0.058296	0.2404	0.4782	0.502719	0	0.068	NA	1	0.00114326	ENSP00000359699	0	0	0	0	0	0
ENSG00000117133.6	ENSG00000117133	RPF1	1	84944942	84963473	9	1376	18531	protein_coding	0.357731	22.0509	55.2458	0	0.0198	0	0.0243	0.4843	0.0501755	0	0.089	0.065	557	0.00421677	ENSP00000359688	0	0	0	0	0	0
ENSG00000174021.6	ENSG00000174021	GNG5	1	84964008	84972248	3	917	8240	protein_coding	0.538577	121.114	4720.66	0	0	NA	0	0.2613	0	0	0	0.067	4	0.0249233	ENSP00000359675	0	0	0	0	0	0
ENSG00000117151.8	ENSG00000117151	CTBS	1	85015289	85040163	7	6593	24874	protein_coding	0.628638	8.61177	39.0006	0.005	0.0194	0.257732	0.1031	0.4681	0.220252	0	NA	NA	NA	0.000688459	NA	0	0	0	0	0	0
ENSG00000180869.3	ENSG00000180869	C1orf180	1	85093913	85100703	3	2881	6790	protein_coding	0.989416	0.773319	0.0884274	NA	NA	NA	NA	NA	NA	7	NA	NA	NA	0.000114764	NA	0	0	0	0	0	0
ENSG00000117155.12	ENSG00000117155	SSX2IP	1	85109390	85156486	13	5830	47096	protein_coding	0.938274	36.2682	57.9137	0.0016	0.0084	0.190476	0.0627	0.789	0.0794677	0	0.026	0.051	NA	0.00329627	NA	0	0	0	0	0	0
ENSG00000171517.5	ENSG00000171517	LPAR3	1	85277285	85358896	2	3343	81611	protein_coding	0.832463	7.62117	23.5326	0.0027	0.0142	0.190141	0.0441	1.0408	0.0423713	0	0	0.401	NA	0.00104744	NA	0	0	0	0	0	0
ENSG00000153898.8	ENSG00000153898	MCOLN2	1	85391268	85462796	14	2855	71528	protein_coding	0.977404	55.4489	330.084	0.0026	0.0038	0.684211	0.0983	0.6339	0.155072	0	0.006	0.259	4	0.00826071	ENSP00000359640	0	0	0	0	0	0
ENSG00000162643.8	ENSG00000162643	WDR63	1	85464830	85598821	23	3454	133991	protein_coding	0.958216	9.97411	25.9307	0.0037	0.0117	0.316239	0.112	0.8897	0.125885	0	0.051	0.318	NA	0.00134535	NA	0	0	0	0	0	0
ENSG00000055732.8	ENSG00000055732	MCOLN3	1	85483765	85514182	9	2944	30417	protein_coding	0.918051	26.8113	407.595	0.001	0.0051	0.196078	0.0457	0.7469	0.0611862	0	0.121	0.036	NA	0.0039373	NA	0	1	0	0	0	0
ENSG00000097096.8	ENSG00000097096	SYDE2	1	85622556	85666729	7	5505	44173	protein_coding	0.771507	4.15355	4.37616	0.0058	0.0105	0.552381	0.1407	0.6346	0.221714	0	0	0.037	2	0.000397827	ENSP00000340594	0	0	0	0	0	0
ENSG00000162642.9	ENSG00000162642	C1orf52	1	85715639	85725355	4	3384	9716	protein_coding	0.486048	11.0767	15.3388	0	0.0052	0	0.0863	1.4106	0.0611796	0	0	0.007	1	0.00151541	ENSP00000419417	0	0	0	0	0	0
ENSG00000142867.8	ENSG00000142867	BCL10	1	85731931	85742773	3	2816	10842	protein_coding	0.584265	11.7088	61.0592	0	0.0092	0	0.0442	0.7906	0.0559069	0	0.047	0.053	NA	0.00175597	NA	1	1	1	1	0	0
ENSG00000153904.14	ENSG00000153904	DDAH1	1	85784164	86043933	6	3914	259769	protein_coding	0.831126	41.8	311.93	0.0018	0.0036	0.5	0.0317	0.5016	0.0631978	0	0.096	NA	7	0.0052241	ENSP00000284031	0	1	0	0	0	0
ENSG00000142871.11	ENSG00000142871	CYR61	1	86046444	86049645	5	2285	3201	protein_coding	0.729068	559.361	210630	0.0011	0.0045	0.244444	0.0359	0.5376	0.0667783	0	0.02	NA	11	0.0916617	ENSP00000398736	0	1	0	0	0	0
ENSG00000117174.6	ENSG00000117174	ZNHIT6	1	86115106	86174116	11	6069	59010	protein_coding	0.527852	8.25634	2.77587	0.002	0.011	0.181818	0.1683	0.7323	0.229824	0	0.041	0.126	90	0.000720763	ENSP00000359606	0	0	0	0	0	0
ENSG00000171502.10	ENSG00000171502	COL24A1	1	86194916	86622626	60	6765	427710	protein_coding	0.775257	4.06644	18.6519	NA	NA	NA	0.1328	0.4834	0.274721	0	0.12	0.053	35	0.00031624	ENSP00000359603	0	0	0	0	0	0
ENSG00000122417.11	ENSG00000122417	ODF2L	1	86814344	86862023	18	5705	47679	protein_coding	0.50162	7.51578	9.72062	0.0118	0.0157	0.751592	0.168	0.664	0.253012	2	0.07	0.027	NA	0.000697243	NA	0	0	0	0	0	0
ENSG00000137975.7	ENSG00000137975	CLCA2	1	86889769	86922241	14	4011	32472	protein_coding	0.952771	74.1545	1092.53	0.0058	0.0071	0.816901	0.1724	0.5692	0.302881	1	0	NA	NA	0.00912466	NA	0	0	0	0	0	0
ENSG00000016490.11	ENSG00000016490	CLCA1	1	86934051	86965972	15	3295	31921	protein_coding	0.986466	295.948	60532	0.0052	0.0142	0.366197	0.1549	0.6901	0.22446	1	0.052	NA	NA	0.0410151	NA	0	0	0	0	0	0
ENSG00000016602.8	ENSG00000016602	CLCA4	1	87012761	87046437	14	3197	33676	protein_coding	0.964454	239.572	69468.1	0.0063	0.0125	0.504	0.1949	0.7474	0.260771	0	0	NA	NA	0.0338032	NA	0	0	0	0	0	0
ENSG00000097033.10	ENSG00000097033	SH3GLB1	1	87170259	87213867	9	6362	43608	protein_coding	0.489169	36.0763	505.519	0.0049	0.0175	0.28	0.0244	0.3735	0.065328	0	0	0.146	NA	0.0029999	NA	0	0	0	0	0	0
ENSG00000183291.11	ENSG00000183291	2020-09-15	1	87328132	87380107	5	1772	51975	protein_coding	0.469452	85.4616	567.781	0	0.0162	0	NA	NA	NA	0	0.018	NA	18	0.0152716	ENSP00000328729	0	0	0	0	0	0
ENSG00000153936.12	ENSG00000153936	HS2ST1	1	87380331	87602334	7	6729	222003	protein_coding	0.716042	14.7065	13.9662	NA	NA	NA	0.0118	0.6244	0.0188981	0	0.025	0.068	NA	0.00114907	NA	0	1	0	0	0	0
ENSG00000143013.8	ENSG00000143013	LMO4	1	87794151	87814606	5	5400	20455	protein_coding	0.837244	62.3254	522.967	0	0.0065	0	0	0.1874	0	0	0.007	0.021	26	0.00607766	ENSP00000359573	0	1	0	0	0	0
ENSG00000065243.14	ENSG00000065243	PKN2	1	89149905	89301938	22	6099	152033	protein_coding	0.380304	13.3346	11.5521	0.0013	0.0061	0.213115	0.0274	0.4169	0.0657232	0	0	0.007	105	0.00115476	ENSP00000359552	0	0	0	0	0	0
ENSG00000137947.7	ENSG00000137947	GTF2B	1	89318615	89357627	7	1344	39012	protein_coding	0.438978	17.6135	20.8862	0	0.0282	0	0.0015	0.5263	0.00285009	0	0	0.025	153	0.00337612	ENSP00000359531	0	0	0	0	0	0
ENSG00000137944.12	ENSG00000137944	CCBL2	1	89401456	89458636	14	2056	57180	protein_coding	0.435505	22.5739	27.7165	0.0049	0.0093	0.526882	0.0914	0.5987	0.152664	0	0.22	0.228	96	0.00385003	ENSP00000260508	0	0	0	0	0	0
ENSG00000213516.5	ENSG00000213516	RBMXL1	1	89445139	89458643	3	5081	13504	protein_coding	0.388291	7.4357	4.46241	0	0.0103	0	0.0271	0.3312	0.0818237	9	0	0.067	11	0.000765451	ENSP00000318415	0	0	0	0	0	0
ENSG00000117226.7	ENSG00000117226	GBP3	1	89472349	89488577	10	3668	16228	protein_coding	0.727178	22.1569	184.409	0.0098	0.0125	0.784	NA	NA	NA	4	0.39	0.716	7	0.00289067	ENSP00000359512	0	0	0	0	0	0
ENSG00000117228.9	ENSG00000117228	GBP1	1	89518002	89531043	11	3024	13041	protein_coding	0.623628	20.9654	456.164	0.0054	0.0219	0.246575	NA	NA	NA	0	0	0	59	0.00304433	ENSP00000359504	0	0	1	0	0	0
ENSG00000162645.8	ENSG00000162645	GBP2	1	89571815	89616139	15	3672	44324	protein_coding	0.665158	58.2636	1018.47	0	0.0171	0	0.1873	0.7162	0.261519	4	0	0.01	49	0.00758621	ENSP00000359497	0	0	1	0	0	0
ENSG00000213512.1	ENSG00000213512	GBP7	1	89597434	89641723	11	2443	44289	protein_coding	0.997501	19.7526	204.554	0.0074	0.0075	0.986667	0.2136	0.6832	0.312646	1	0.048	0.403	12	0.00316229	ENSP00000294671	0	0	0	0	0	0
ENSG00000162654.8	ENSG00000162654	GBP4	1	89646831	89664615	11	6116	17784	protein_coding	0.80264	16.1069	216.369	0.0039	0.0145	0.268966	0.1904	0.5781	0.329355	2	0	0.081	23	0.00139391	ENSP00000359490	0	0	0	0	0	0
ENSG00000154451.10	ENSG00000154451	GBP5	1	89724633	89738544	8	4691	13911	protein_coding	0.902293	11.5563	507.488	0.0089	0.0064	1.39062	0.2501	0.6304	0.396732	NA	0.056	0.103	7	0.00127362	ENSP00000340396	0	0	1	0	0	0
ENSG00000183347.13	ENSG00000183347	GBP6	1	89829617	89852020	11	2976	22403	protein_coding	0.989491	213.864	8279.94	0.0047	0.0051	0.921569	0.209	0.6743	0.309951	0	0.011	0.053	24	0.0312724	ENSP00000359485	0	0	1	0	0	0
ENSG00000197147.8	ENSG00000197147	LRRC8B	1	89990395	90063423	6	7587	73028	protein_coding	0.808381	11.7846	27.8306	0.0013	0.0104	0.125	0.0337	0.9124	0.0369356	1	0.01	0.385	6	0.000799449	ENSP00000332674	0	0	0	0	0	0
ENSG00000171488.10	ENSG00000171488	LRRC8C	1	90098631	90235462	3	7215	136831	protein_coding	0.693554	5.65301	5.21663	0.0007	0.0033	0.212121	0.0147	0.7345	0.0200136	0	0.01	0.027	6	0.000407277	ENSP00000359483	0	0	0	0	0	0
ENSG00000171492.10	ENSG00000171492	LRRC8D	1	90286573	90402170	3	3947	115597	protein_coding	0.772859	0.336409	0.0348566	0.0029	0.0097	0.298969	0.0201	0.7492	0.0268286	0	NA	0.203	9	4.18e-05	ENSP00000338887	0	0	0	0	0	0
ENSG00000162664.12	ENSG00000162664	ZNF326	1	90460671	90501090	12	9421	40419	protein_coding	0.414803	6.74619	4.93196	0.0082	0.0309	0.265372	0.0821	0.3579	0.229394	0	NA	NA	NA	0.000336845	NA	0	0	0	0	0	0
ENSG00000143032.7	ENSG00000143032	BARHL2	1	91177096	91182794	3	1976	5698	protein_coding	0.997965	2.82004	84.8752	0.0222	0.0378	0.587302	0.0317	0.4766	0.0665128	0	0	NA	13	0.000486852	ENSP00000359474	0	1	0	0	0	0
ENSG00000122482.16	ENSG00000122482	ZNF644	1	91380859	91487829	6	5692	106970	protein_coding	0.406114	7.38775	6.8758	0.0018	0.0102	0.176471	0.0856	0.4989	0.171577	0	0.064	0	344	0.000686676	ENSP00000337008	0	0	0	0	0	0
ENSG00000162669.11	ENSG00000162669	HFM1	1	91726323	91870426	39	4892	144103	protein_coding	0.953487	13.3449	104.063	0.0028	0.0105	0.266667	0.1305	0.514	0.253891	0	0.315	NA	125	0.00141215	ENSP00000359454	0	0	0	0	0	0
ENSG00000097046.8	ENSG00000097046	CDC7	1	91966408	91991321	12	3301	24913	protein_coding	0.837441	11.6884	14.1205	NA	NA	NA	0.117	0.5184	0.225694	0	0.104	0.469	331	0.00161958	ENSP00000234626	0	1	0	0	0	0
ENSG00000069702.6	ENSG00000069702	TGFBR3	1	92145902	92371892	17	6399	225990	protein_coding	0.675143	48.2792	411.017	0.0034	0.0182	0.186813	0.0947	0.5024	0.188495	0	0.011	0.012	1	0.00398903	ENSP00000212355	0	1	1	0	0	0
ENSG00000137948.14	ENSG00000137948	BRDT	1	92414928	92479983	19	3677	65055	protein_coding	0.999743	53.763	301.751	0.0085	0.0075	1.13333	0.1555	0.9175	0.169482	0	0	NA	88	0.00699482	ENSP00000354568	0	0	0	0	0	0
ENSG00000172031.6	ENSG00000172031	EPHX4	1	92495539	92529093	7	1430	33554	protein_coding	0.966814	6.96097	9.27712	0.003	0.0025	1.2	0.0662	0.442	0.149774	0	0	0.133	NA	0.0013161	NA	0	0	0	0	0	0
ENSG00000189195.5	ENSG00000189195	BTBD8	1	92545862	92613393	6	1610	67531	protein_coding	0.53297	0.519021	0.0909829	0.0013	0	NA	0.1653	0.5053	0.327132	NA	0	NA	2	9.52e-05	ENSP00000343686	0	0	0	0	0	0
ENSG00000069712.9	ENSG00000069712	KIAA1107	1	92632542	92650280	9	4613	17738	protein_coding	0.902456	16.5735	41.8843	0.0061	0.009	0.677778	0.2886	0.7752	0.372291	0	0.028	0	NA	0.00184644	NA	0	0	0	0	0	0
ENSG00000203910.4	ENSG00000203910	C1orf146	1	92683497	92711370	7	864	27873	protein_coding	0.99119	3.4608	1.13451	0	0	NA	0.0879	0.4763	0.184548	1	0	NA	NA	0.000719007	NA	0	0	0	0	0	0
ENSG00000174842.12	ENSG00000174842	GLMN	1	92711959	92764544	19	1976	52585	protein_coding	0.564146	7.17197	4.28934	0.0035	0.0082	0.426829	0.0762	0.4265	0.178664	0	0.023	0.004	NA	0.00123785	NA	0	0	0	0	0	0
ENSG00000122484.8	ENSG00000122484	RPAP2	1	92764522	92867613	13	16980	103091	protein_coding	0.365036	1.73139	0.943337	0.0014	0.0156	0.0897436	0.1871	0.6261	0.298834	0	NA	NA	NA	2.45e-05	NA	0	0	0	0	0	0
ENSG00000162676.7	ENSG00000162676	GFI1	1	92940319	92952433	7	2848	12114	protein_coding	0.864631	5.96782	9.66435	0	0.0063	0	0.0588	0.9217	0.0637952	0	0	0.036	335	0.000891228	ENSP00000294702	1	0	1	0	0	0
ENSG00000067208.10	ENSG00000067208	EVI5	1	92974253	93257961	18	7385	283708	protein_coding	0.508384	5.52176	1.3815	0.0019	0.005	0.38	0.0408	0.4096	0.0996094	0	0.074	0.105	27	0.000386788	ENSP00000359356	0	0	0	0	0	0
ENSG00000122406.8	ENSG00000122406	RPL5	1	93297582	93307481	3	1207	9899	protein_coding	0.671914	1588.99	141022	0	0.0069	0	0.0075	0.4179	0.0179469	0	0	0.003	1537	0.312048	ENSP00000359345	0	0	0	0	0	0
ENSG00000154511.7	ENSG00000154511	FAM69A	1	93307724	93427057	5	2569	119333	protein_coding	0.645602	14.8072	26.7443	0	0.0025	0	0.0141	0.3794	0.0371639	0	0.004	0.121	NA	0.0023146	NA	0	0	0	0	0	0
ENSG00000143033.13	ENSG00000143033	MTF2	1	93544792	93604638	15	4110	59846	protein_coding	0.688164	12.5266	5.94566	0	0	NA	0.0113	0.172	0.0656977	0	0.012	0.079	79	0.00151201	ENSP00000359321	0	1	0	0	0	0
ENSG00000117500.8	ENSG00000117500	TMED5	1	93615299	93646285	4	6100	30986	protein_coding	0.461472	12.3403	19.5173	0.0023	0	NA	0.0525	0.3396	0.154594	1	0.053	0.058	43	0.00106776	ENSP00000359305	0	0	0	0	0	0
ENSG00000122483.13	ENSG00000122483	CCDC18	1	93645476	93744287	29	4838	98811	protein_coding	0.864027	7.63804	5.4435	0.0027	0.0031	0.870968	0.0799	0.5553	0.143886	2	0.042	0.06	NA	0.000818523	NA	0	0	0	0	0	0
ENSG00000117505.8	ENSG00000117505	DR1	1	93811445	93835055	3	10145	23610	protein_coding	0.545282	10.6682	5.12421	0	0	NA	0.0027	0.3153	0.00856327	0	NA	NA	49	0.000473251	ENSP00000359290	0	0	0	0	0	0
ENSG00000137942.12	ENSG00000137942	FNBP1L	1	93913688	94020218	14	5327	106530	protein_coding	0.57862	18.0436	62.991	0	0.0017	0	0.0109	0.3487	0.031259	0	0.111	0.095	NA	0.00177749	NA	0	0	0	0	0	0
ENSG00000137936.12	ENSG00000137936	BCAR3	1	94027347	94312706	14	3203	285359	protein_coding	0.484347	9.74787	12.8038	0.0045	0.0139	0.323741	0.0741	0.6429	0.115259	0	0	0.027	NA	0.00137188	NA	0	0	0	0	0	0
ENSG00000067334.9	ENSG00000067334	DNTTIP2	1	94333373	94345474	7	4356	12101	protein_coding	0.391623	13.1806	29.7157	0.0012	0.0113	0.106195	0.267	0.6208	0.43009	0	0.031	0.029	277	0.00153253	ENSP00000411010	0	0	0	0	0	0
ENSG00000023909.5	ENSG00000023909	GCLM	1	94350761	94374966	7	4850	24205	protein_coding	0.675686	10.5156	18.6637	0	0.0111	0	0.0199	0.3129	0.0635986	0	0.044	0.153	75	0.00112269	ENSP00000359258	0	0	0	0	0	0
ENSG00000198691.7	ENSG00000198691	ABCA4	1	94458393	94586688	50	7259	128295	protein_coding	0.943418	2.71165	84.7276	0.0036	0.0151	0.238411	0.0632	0.4926	0.128299	0	0	NA	10	0.000193921	ENSP00000359245	1	0	0	0	0	0
ENSG00000137962.8	ENSG00000137962	ARHGAP29	1	94614544	94740624	10	8470	126080	protein_coding	0.657077	13.9186	30.9921	0.0033	0.0081	0.407407	0.0933	0.507	0.184024	0	0	0.014	6	0.000812819	ENSP00000260526	0	0	0	0	0	0
ENSG00000117528.7	ENSG00000117528	ABCD3	1	94883933	94984222	14	4353	100289	protein_coding	0.54987	14.8592	22.5829	0.0008	0.0109	0.0733945	0.023	0.4522	0.0508624	0	0.016	0.082	94	0.00173076	ENSP00000359233	0	0	0	0	0	0
ENSG00000117525.9	ENSG00000117525	F3	1	94994781	95007356	6	2281	12575	protein_coding	0.694332	102.422	9903.15	0.0076	0.0144	0.527778	0.3883	0.7202	0.539156	3	0.037	NA	6	0.0167365	ENSP00000334145	0	1	0	0	0	0
ENSG00000143036.12	ENSG00000143036	SLC44A3	1	95285898	95360802	15	2373	74904	protein_coding	0.748992	12.5255	85.1097	0.0015	0.0049	0.306122	0.1116	0.5445	0.204959	1	0.052	0.138	17	0.00201983	ENSP00000271227	0	0	0	0	0	0
ENSG00000117519.11	ENSG00000117519	CNN3	1	95362507	95392834	7	2158	30327	protein_coding	0.565154	165.915	3137.75	0.0013	0.0047	0.276596	0.0096	0.539	0.0178108	0	0.106	0.139	62	0.0278022	ENSP00000359225	0	0	0	0	0	0
ENSG00000172339.9	ENSG00000172339	ALG14	1	95439963	95538501	4	9363	98538	protein_coding	0.680016	2.26583	0.273197	0.011	0.0287	0.383275	0.1462	0.5512	0.265239	0	NA	NA	28	0.00011438	ENSP00000359224	0	0	0	0	0	0
ENSG00000152078.5	ENSG00000152078	TMEM56	1	95582894	95663163	7	6815	80269	protein_coding	0.881271	20.2881	68.8914	0.002	0	NA	0.1553	0.579	0.268221	0	0.027	0.055	4	0.00156422	ENSP00000359222	0	0	0	0	0	0
ENSG00000271092.1	ENSG00000271092	RP11-57H12.6	1	95583479	95712781	8	1483	129302	protein_coding	0.834577	0.59241	0.367523	0.1376	0.1803	0.763172	0.2979	0.8817	0.33787	NA	0	NA	NA	0.000110959	NA	0	0	0	0	0	0
ENSG00000122481.12	ENSG00000122481	RWDD3	1	95699711	95712781	3	1535	13070	protein_coding	0.383946	5.23881	3.21992	0.0091	0.0084	1.08333	0.137	0.3326	0.411906	0	0.306	0.167	NA	0.000973661	NA	0	0	0	0	0	0
ENSG00000237435.4	ENSG00000237435	RP11-147C23.1	1	96403457	96488436	3	940	84979	protein_coding	0.999676	9.44732	16.8057	NA	NA	NA	NA	NA	NA	NA	NA	NA	NA	0.00193904	NA	0	0	0	0	0	0
ENSG00000117569.14	ENSG00000117569	PTBP2	1	97187221	97289294	14	12000	102073	protein_coding	0.612937	7.20402	5.74443	0	0.0091	0	0.0017	0.3038	0.00559579	0	NA	NA	31	0.000233742	ENSP00000412788	0	0	0	0	0	0
ENSG00000188641.8	ENSG00000188641	DPYD	1	97543299	98386605	23	4389	843306	protein_coding	0.617989	14.671	64.0288	0.0013	0.021	0.0619048	0.0556	0.5453	0.101962	0	0.014	0.159	1140	0.00169732	ENSP00000359211	1	0	0	0	0	0
ENSG00000162627.12	ENSG00000162627	SNX7	1	99127236	99226056	9	1733	98820	protein_coding	0.540248	18.9523	20.6945	0.0044	0.0143	0.307692	0.0529	0.7655	0.0691052	0	0.041	0.282	17	0.00341582	ENSP00000304429	0	0	0	0	0	0
ENSG00000117598.7	ENSG00000117598	LPPR5	1	99355806	99470588	6	4128	114782	protein_coding	0.986933	4.33766	4.14496	0	0.0065	0	0.02	0.4328	0.0462107	0	0.049	NA	NA	0.000523398	NA	0	0	0	0	0	0
ENSG00000117600.8	ENSG00000117600	LPPR4	1	99729509	99775146	7	5362	45637	protein_coding	0.922255	13.0477	160.883	0.0006	0.0105	0.0571429	0.018	0.5861	0.0307115	0	0	NA	NA	0.00127627	NA	0	0	0	0	0	0
ENSG00000099260.6	ENSG00000099260	PALMD	1	100111499	100160097	5	5289	48598	protein_coding	0.757387	65.3647	977.584	0.0028	0.0067	0.41791	0.1201	0.5483	0.219041	0	0	NA	NA	0.00649924	NA	0	0	0	0	0	0
ENSG00000156869.8	ENSG00000156869	FRRS1	1	100174259	100232187	17	2689	57928	protein_coding	0.689541	4.68391	5.3914	0.0029	0.0146	0.19863	0.1987	0.7568	0.262553	0	0	0.063	6	0.000717418	ENSP00000287474	0	0	0	0	0	0
ENSG00000162688.11	ENSG00000162688	AGL	1	100315640	100389579	34	7412	73939	protein_coding	0.846007	32.3855	529.744	0.0009	0.0103	0.0873786	0.0409	0.6401	0.0638963	0	0.033	0.016	119	0.00226008	ENSP00000294724	1	0	0	0	0	0
ENSG00000117620.8	ENSG00000117620	SLC35A3	1	100435345	100492535	6	5527	57190	protein_coding	0.67265	12.9682	57.2381	0.0015	0.0076	0.197368	0.022	0.4722	0.0465904	0	0.01	0	41	0.00124164	ENSP00000359174	0	0	0	0	0	0
ENSG00000156875.9	ENSG00000156875	HIAT1	1	100503653	100548933	12	2765	45280	protein_coding	0.443973	32.1211	42.9858	0	0.0021	0	0.001	0.3248	0.00307882	0	0.001	0.006	21	0.0048588	ENSP00000359171	0	0	0	0	0	0
ENSG00000156876.8	ENSG00000156876	SASS6	1	100549119	100598511	16	3956	49392	protein_coding	0.805489	7.25123	2.02608	0.0007	0.0059	0.118644	0.0832	0.601	0.138436	0	0.01	0.051	138	0.000899773	ENSP00000287482	0	0	0	0	0	0
ENSG00000122435.5	ENSG00000122435	TRMT13	1	100598706	100616053	11	3118	17347	protein_coding	0.449509	6.61268	3.76895	0.0027	0.0033	0.818182	0.0833	0.4223	0.197253	0	0.085	NA	27	0.000943339	ENSP00000359160	0	0	0	0	0	0
ENSG00000122477.8	ENSG00000122477	LRRC39	1	100614409	100643771	11	1455	29362	protein_coding	0.942206	64.1282	2528.88	0.0026	0.0084	0.309524	0.091	0.4601	0.197783	0	0	0.142	16	0.0120705	ENSP00000344470	0	0	0	0	0	0
ENSG00000137992.10	ENSG00000137992	DBT	1	100652475	100715390	11	10788	62915	protein_coding	0.399321	4.50183	3.34521	0.0019	0.008	0.2375	0.0654	0.5801	0.112739	0	NA	NA	218	0.0001788	ENSP00000359151	1	1	0	0	0	0
ENSG00000137996.8	ENSG00000137996	RTCA	1	100731763	100758325	11	2524	26562	protein_coding	0.526528	18.2055	22.0362	0.0047	0.0111	0.423423	0.0472	0.5989	0.0788112	0	0.166	NA	539	0.00286777	ENSP00000260563	0	0	0	0	0	0
ENSG00000079335.13	ENSG00000079335	CDC14A	1	100810584	100985833	15	4166	175249	protein_coding	0.861488	13.8065	31.4183	0.0029	0.0064	0.453125	0.0773	0.4656	0.166022	0	0.077	0.19	45	0.00165375	ENSP00000354916	0	0	0	0	0	0
ENSG00000181656.6	ENSG00000181656	GPR88	1	101003693	101007574	2	3489	3881	protein_coding	0.862682	2.95145	1532.32	0	0.0132	0	0.0187	0.8575	0.0218076	0	0	0.024	3	0.000395756	ENSP00000314223	0	0	0	0	0	0
ENSG00000162692.6	ENSG00000162692	VCAM1	1	101185298	101204601	1	3864	19303	protein_coding	0.943694	142.464	4464.3	0.0252	0.0348	0.724138	0.1424	0.592	0.240541	2	0	NA	NA	0.0178955	NA	0	1	1	0	0	0
ENSG00000162694.9	ENSG00000162694	EXTL2	1	101337943	101361554	5	3980	23611	protein_coding	0.561485	9.63126	18.9193	0.0027	0	NA	0.0674	0.6959	0.096853	0	0	0.424	NA	0.00119037	NA	0	0	0	0	0	0
ENSG00000162695.7	ENSG00000162695	SLC30A7	1	101361632	101447309	12	7886	85677	protein_coding	0.443963	6.83766	7.59518	0.0036	0.0148	0.243243	0.0203	0.4326	0.0469256	0	0	0.014	117	0.000440876	ENSP00000350278	0	0	0	0	0	0
ENSG00000117543.15	ENSG00000117543	DPH5	1	101455179	101491644	9	2150	36465	protein_coding	0.631802	12.2107	6.61349	0	0.0285	0	0.0457	0.4792	0.0953673	0	0	0.013	320	0.00204602	ENSP00000359127	0	0	0	0	0	0
ENSG00000170989.8	ENSG00000170989	S1PR1	1	101702444	101707074	2	2907	4630	protein_coding	0.776991	87.3063	1830.37	0.0686	0.2352	0.291667	0.0273	0.775	0.0352258	0	0.02	0	NA	0.012905	NA	0	1	0	0	0	0
ENSG00000118733.12	ENSG00000118733	OLFM3	1	102268130	102462586	6	3249	194456	protein_coding	0.994557	9.60151	27.456	0.0011	0.0142	0.0774648	0.0233	0.6363	0.0366179	0	0.027	NA	NA	0.00134046	NA	0	0	0	0	0	0
ENSG00000060718.14	ENSG00000060718	COL11A1	1	103342023	103574052	67	7260	232029	protein_coding	0.977077	24.0829	1080.33	0.001	0.0186	0.0537634	0.0319	0.51	0.062549	0	0.022	NA	1	0.00172425	ENSP00000359114	1	1	0	0	0	0
ENSG00000185946.11	ENSG00000185946	RNPC3	1	104068313	104097861	6	3652	29548	protein_coding	0.583506	33.6619	209.409	0.0009	0.0102	0.0882353	0.0619	0.5927	0.104437	2	0.019	0.025	100	0.00439981	ENSP00000391432	0	0	0	0	0	0
ENSG00000240038.2	ENSG00000240038	AMY2B	1	104096437	104122156	9	4707	25719	protein_coding	0.98886	677.068	369534	0.0025	0.0157	0.159236	0.0879	0.7181	0.122406	NA	0.263	0.309	24	0.0741328	ENSP00000354610	0	0	0	0	0	0
ENSG00000243480.3	ENSG00000243480	AMY2A	1	104159999	104168402	10	1624	8403	protein_coding	0.999845	5125.18	1.95041e+07	NA	NA	NA	0.0884	0.7766	0.11383	NA	0.02	NA	27	0.939183	ENSP00000397582	0	0	0	0	0	0
ENSG00000237763.5	ENSG00000237763	AMY1A	1	104197912	104207173	11	1776	9261	protein_coding	0.997574	4.54231	344.205	NA	NA	NA	0.088	0.7618	0.115516	NA	0.035	NA	21	0.000810371	ENSP00000359100	0	0	0	0	0	0
ENSG00000174876.12	ENSG00000174876	AMY1B	1	104230037	104239302	11	1851	9265	protein_coding	0.983925	0.923295	1.63688	NA	NA	NA	0.088	0.7618	0.115516	12	NA	NA	21	0.000162705	ENSP00000330484	0	0	0	0	0	0
ENSG00000187733.6	ENSG00000187733	AMY1C	1	104293028	104301312	10	1622	8284	protein_coding	0.991307	9.35231	127.907	NA	NA	NA	0.088	0.7618	0.115516	7	0.03	NA	21	0.00171234	ENSP00000359096	0	0	0	0	0	0
ENSG00000198890.6	ENSG00000198890	PRMT6	1	107599267	107601916	1	2638	2649	protein_coding	0.604601	11.3343	21.505	0	0.022	0	0.0396	0.631	0.0627575	0	0.281	0.45	552	0.00174702	ENSP00000359095	0	0	0	0	0	0
ENSG00000162631.14	ENSG00000162631	NTNG1	1	107682629	108026080	5	4698	343451	protein_coding	0.822264	3.29448	73.0375	0	0.006	0	0.0176	0.3288	0.053528	0	0.144	NA	8	0.000360802	ENSP00000359085	0	0	0	0	0	0
ENSG00000134215.11	ENSG00000134215	VAV3	1	108113782	108507766	27	4963	393984	protein_coding	0.848957	21.1915	62.2847	0.0157	0.0412	0.381068	0.021	0.4426	0.0474469	0	0.002	0.137	4	0.00222445	ENSP00000359073	0	0	1	0	0	0
ENSG00000085491.11	ENSG00000085491	SLC25A24	1	108676658	108743471	10	4261	66813	protein_coding	0.559664	9.92645	19.1098	0.002	0.0049	0.408163	0.0322	0.5791	0.0556035	0	0.122	0.252	7	0.00117128	ENSP00000457733	0	0	0	0	0	0
ENSG00000196427.9	ENSG00000196427	NBPF4	1	108765963	108786689	15	2470	20726	protein_coding	0.979583	1.48343	0.241777	0.0225	0.0228	0.986842	NA	NA	NA	8	NA	NA	NA	0.000235312	NA	0	0	0	0	0	0
ENSG00000186086.12	ENSG00000186086	NBPF6	1	108918421	109013624	15	2484	95203	protein_coding	0.978232	1.43393	0.283952	0.0191	0.0197	0.969543	NA	NA	NA	7	NA	NA	NA	0.000226832	NA	0	0	0	0	0	0
ENSG00000162636.11	ENSG00000162636	FAM102B	1	109102711	109187522	4	8329	84811	protein_coding	0.61117	9.70851	37.4269	0	0.0057	0	0.0251	0.4154	0.0604237	0	0	0.01	NA	0.000581308	NA	0	0	0	0	0	0
ENSG00000162639.11	ENSG00000162639	HENMT1	1	109190912	109204148	8	1866	13236	protein_coding	0.958673	48.7439	64.1696	0	0.0048	0	0.2104	0.7156	0.294019	0	0	NA	7	0.00856329	ENSP00000359049	0	0	0	0	0	0
ENSG00000134186.7	ENSG00000134186	PRPF38B	1	109234945	109244425	7	3721	9480	protein_coding	0.540337	30.8769	65.2639	0	0.0018	0	0.0288	0.555	0.0518919	0	0	0	71	0.00398811	ENSP00000359042	0	0	0	0	0	0
ENSG00000143107.4	ENSG00000143107	FNDC7	1	109255279	109285365	13	3319	30086	protein_coding	0.97977	1.12821	0.260437	0.0124	0.0237	0.523207	0.0814	0.5087	0.160016	0	NA	NA	NA	0.000155953	NA	0	0	0	0	0	0
ENSG00000116266.6	ENSG00000116266	STXBP3	1	109289296	109352148	4	2532	62852	protein_coding	0.289901	12.5083	51.6021	0.0008	0.0093	0.0860215	0.0437	0.5439	0.0803457	0	0	0.008	60	0.001967	ENSP00000359025	0	1	1	0	0	0
ENSG00000162641.14	ENSG00000162641	AKNAD1	1	109358520	109506106	16	3037	147586	protein_coding	0.989047	9.27558	9.85503	0.0101	0.0133	0.759398	0.3484	0.5659	0.615656	0	0	NA	NA	0.00134239	NA	0	0	0	0	0	0
ENSG00000121957.8	ENSG00000121957	GPSM2	1	109417972	109477167	16	7417	59195	protein_coding	0.719538	11.1459	42.2405	0.0014	0.0123	0.113821	0.0433	0.6364	0.068039	0	NA	NA	NA	0.000773641	NA	0	0	0	0	0	0
ENSG00000121940.11	ENSG00000121940	CLCC1	1	109472130	109506111	12	4813	33981	protein_coding	0.299422	14.4682	14.6299	0.0044	0.0101	0.435644	0.1597	0.5836	0.273646	0	0	0.075	NA	0.00155997	NA	0	0	0	0	0	0
ENSG00000085433.11	ENSG00000085433	WDR47	1	109512836	109584850	14	4250	72014	protein_coding	0.799933	28.2888	151.04	0.0005	0.0069	0.0724638	0.023	0.4412	0.0521306	0	0.011	0.011	NA	0.00334423	NA	0	0	0	0	0	0
ENSG00000197780.5	ENSG00000197780	TAF13	1	109605108	109618624	5	1071	13516	protein_coding	0.572343	25.4602	39.2567	0	0	NA	0	0.7077	0	2	0.016	0	64	0.0051193	ENSP00000355051	0	0	0	0	0	0
ENSG00000215717.5	ENSG00000215717	TMEM167B	1	109632425	109639556	3	3727	7131	protein_coding	0.286927	16.4553	52.0064	0	0	NA	0.0066	0.241	0.0273859	NA	NA	NA	2	0.00212745	ENSP00000342148	0	0	0	0	0	0
ENSG00000179902.8	ENSG00000179902	C1orf194	1	109648573	109656479	4	952	7906	protein_coding	0.993829	168.616	4438.44	0.0493	0.0919	0.536453	0.2023	0.4899	0.412941	3	0	0.29	NA	0.0346077	NA	0	0	0	0	0	0
ENSG00000116299.12	ENSG00000116299	KIAA1324	1	109656301	109749401	14	5952	93100	protein_coding	0.896596	59.0818	1233.88	0.0034	0.0142	0.239437	0.0483	0.5297	0.0911837	0	0	0.604	NA	0.00525861	NA	0	0	0	0	0	0
ENSG00000031698.8	ENSG00000031698	SARS	1	109756540	109780791	12	1870	24251	protein_coding	0.427062	66.0473	839.894	0.001	0.0039	0.25641	0.0216	0.4435	0.0487035	0	0	0.045	320	0.0115975	ENSP00000234677	0	0	0	0	0	0
ENSG00000143126.7	ENSG00000143126	CELSR2	1	109792641	109818372	34	10500	25731	protein_coding	0.788149	19.7894	133.684	0.0051	0.013	0.392308	0.0207	0.6545	0.0316272	NA	0.387	0.21	7	0.000825412	ENSP00000271332	0	0	0	0	0	0
ENSG00000134222.12	ENSG00000134222	PSRC1	1	109822178	109825808	5	1865	3630	protein_coding	0.842618	20.3462	404.541	0.0046	0	NA	0.18	0.5178	0.347625	3	0.098	0.343	NA	0.0035701	NA	0	0	0	0	0	0
ENSG00000221986.2	ENSG00000221986	MYBPHL	1	109834987	109849663	9	1363	14676	protein_coding	0.995367	58.5173	1218.89	0.004	0.0205	0.195122	0.0882	0.4457	0.197891	4	0	NA	16	0.0111863	ENSP00000349678	0	0	0	0	0	0
ENSG00000134243.7	ENSG00000134243	SORT1	1	109852192	109940573	20	7008	88381	protein_coding	0.723552	70.3023	1044.75	0.0033	0.0163	0.202454	0.0437	0.4722	0.0925455	0	0.042	0.018	NA	0.00524546	NA	0	0	0	0	0	0
ENSG00000143106.8	ENSG00000143106	PSMA5	1	109941653	109969062	9	3720	27409	protein_coding	0.656901	25.5828	27.5412	0	0	NA	0	0.2505	0	0	0	0	348	0.00330462	ENSP00000271308	0	0	1	0	0	0
ENSG00000143028.7	ENSG00000143028	SYPL2	1	110009180	110024759	6	3618	15579	protein_coding	0.959088	71.4473	903.502	0	0.0271	0	0.0302	0.4204	0.0718363	0	0.228	NA	2	0.00937485	ENSP00000358888	0	0	0	0	0	0
ENSG00000162650.11	ENSG00000162650	ATXN7L2	1	110026101	110035426	8	4367	9325	protein_coding	0.766874	14.2512	27.6	0.0051	0.0068	0.75	0.0555	0.3022	0.183653	0	0.031	0.032	NA	0.0016572	NA	0	0	0	0	0	0
ENSG00000174151.10	ENSG00000174151	CYB561D1	1	110036674	110045554	4	5073	8880	protein_coding	0.500879	7.09263	18.9505	0.0366	0.0525	0.697143	0.0859	0.3627	0.236835	0	0.115	0.026	NA	0.000730415	NA	0	0	0	0	0	0
ENSG00000181754.6	ENSG00000181754	AMIGO1	1	110046797	110052360	2	5086	5563	protein_coding	0.777771	14.5199	29.1045	0	0.0037	0	0.0595	0.466	0.127682	0	0.177	0.216	NA	0.00149056	NA	0	0	0	0	0	0
ENSG00000156097.8	ENSG00000156097	GPR61	1	110082494	110091028	2	4919	8534	protein_coding	0.961308	4.54009	5.26411	0	0.0168	0	0.0203	0.3873	0.0524141	0	0	0	NA	0.000479876	NA	0	0	0	0	0	0
ENSG00000065135.7	ENSG00000065135	GNAI3	1	110091233	110136975	9	3197	45742	protein_coding	0.490152	38.5385	197.166	0	0.0113	0	0.0079	0.2774	0.0284787	0	0	0.028	125	0.0054226	ENSP00000358867	1	0	0	0	0	0
ENSG00000134183.7	ENSG00000134183	GNAT2	1	110145889	110155679	8	1331	9790	protein_coding	0.943485	1.65152	0.267101	0	0	NA	0.0217	0.5477	0.0396202	0	0.009	0.065	104	0.000317198	ENSP00000251337	1	0	0	0	0	0
ENSG00000116337.11	ENSG00000116337	AMPD2	1	110158726	110174673	18	3881	15947	protein_coding	0.832989	68.835	728.848	0.0081	0.0159	0.509434	0.0116	0.6498	0.0178516	0	0	0.007	67	0.00864596	ENSP00000256578	0	0	0	0	0	0
ENSG00000168765.11	ENSG00000168765	GSTM4	1	110198703	110208118	5	3985	9415	protein_coding	0.655521	19.5122	72.0729	0.0041	0.0129	0.317829	0.0665	0.6297	0.105606	0	0.158	0.797	NA	0.00240841	NA	0	0	0	0	0	0
ENSG00000213366.8	ENSG00000213366	GSTM2	1	110210644	110252171	8	1722	41527	protein_coding	0.695543	86.7502	2025.7	NA	NA	NA	0.0893	0.6867	0.130042	6	0.079	0.471	NA	0.0156335	NA	0	0	0	0	0	0
ENSG00000134184.8	ENSG00000134184	GSTM1	1	110230436	110251661	8	1153	21225	protein_coding	0.789152	98.6407	40316.4	0.0103	0.0063	1.63492	0.0978	0.7262	0.134674	NA	0.406	0.685	NA	0.0195259	NA	0	0	0	0	0	0
ENSG00000134201.6	ENSG00000134201	GSTM5	1	110254864	110318050	5	4365	63186	protein_coding	0.903645	40.0179	531.828	0.0071	0.0182	0.39011	0.098	0.7099	0.138048	2	0.2	0.504	NA	0.00463706	NA	0	0	0	0	0	0
ENSG00000134202.6	ENSG00000134202	GSTM3	1	110276554	110284384	9	4119	7830	protein_coding	0.906057	137.16	481.067	0.0019	0.013	0.146154	0.06	0.5976	0.100402	4	0.617	0.801	NA	0.0165468	NA	0	0	0	0	0	0
ENSG00000198758.6	ENSG00000198758	EPS8L3	1	110292702	110306649	19	2306	13947	protein_coding	0.977909	93.2804	4145.41	0.0048	0.0097	0.494845	0.1672	0.5701	0.293282	2	0	NA	NA	0.0152453	NA	0	0	0	0	0	0
ENSG00000184371.9	ENSG00000184371	CSF1	1	110452864	110473614	9	4201	20750	protein_coding	0.790109	71.4361	1651.03	0.0034	0.0112	0.303571	0.1934	0.3814	0.507079	2	0	0.026	2	0.00850658	ENSP00000327513	0	1	1	0	0	0
ENSG00000168710.13	ENSG00000168710	AHCYL1	1	110527308	110566357	17	3998	39049	protein_coding	0.703117	101.498	4106.45	0	0.0077	0	0	0.2832	0	0	0.029	0.015	300	0.0124473	ENSP00000358814	0	0	0	0	0	0
ENSG00000143093.10	ENSG00000143093	STRIP1	1	110574199	110617263	14	4856	43064	protein_coding	0.473769	19.2436	20.4721	0	0.0218	0	0.0091	0.4788	0.0190058	0	0.057	NA	NA	0.00205086	NA	0	0	0	0	0	0
ENSG00000156150.6	ENSG00000156150	ALX3	1	110602616	110613322	4	1855	10706	protein_coding	0.51576	3.56275	1.64079	0.0013	0.0227	0.0572687	0.0414	0.4709	0.0879168	NA	0.061	0.112	4	0.000627131	ENSP00000358807	1	0	0	0	0	0
ENSG00000186150.3	ENSG00000186150	UBL4B	1	110655062	110656569	1	1507	1507	protein_coding	0.998761	116.338	1318.97	0.0072	0.022	0.327273	0.3103	1.967	0.157753	2	0.017	NA	432	0.0216552	ENSP00000334044	0	0	0	0	0	0
ENSG00000197106.6	ENSG00000197106	SLC6A17	1	110693108	110744824	12	6415	51716	protein_coding	0.974799	40.1582	374.488	0.0006	0.0168	0.0357143	0.017	0.4973	0.0341846	0	0	NA	NA	0.00331122	NA	0	0	0	0	0	0
ENSG00000116396.9	ENSG00000116396	KCNC4	1	110753965	110825722	2	7595	71757	protein_coding	0.78221	14.054	50.8913	0.0013	0.0304	0.0427632	0.0301	0.7705	0.0390655	0	0.055	0.055	NA	0.000954	NA	0	0	0	0	0	0
ENSG00000162775.10	ENSG00000162775	RBM15	1	110881128	110889299	3	4241	8171	protein_coding	0.79653	8.67749	3.92402	0	0.0049	0	0.0326	0.358	0.0910615	0	0	0.031	27	0.00102726	ENSP00000358799	0	1	0	0	0	0
ENSG00000168679.13	ENSG00000168679	SLC16A4	1	110905470	110933704	9	2623	28234	protein_coding	0.859419	17.284	69.7945	0.0014	0.0095	0.147368	0.1115	0.4296	0.259544	0	0.01	0.275	1	0.00268133	ENSP00000358794	0	0	0	0	0	0
ENSG00000134248.9	ENSG00000134248	LAMTOR5	1	110943871	110950564	3	1827	6693	protein_coding	0.64327	90.3965	4136.75	0.0028	0.0192	0.145833	0.1276	0.3899	0.327263	NA	0	NA	6	0.0159994	ENSP00000256644	0	0	0	0	0	0
ENSG00000143125.5	ENSG00000143125	PROK1	1	110993822	110999976	3	1335	6154	protein_coding	0.977083	173.161	12535.4	0	0.0262	0	0.0797	0.7171	0.111142	0	0	NA	NA	0.0332355	NA	0	0	0	0	0	0
ENSG00000143105.5	ENSG00000143105	KCNA10	1	111059839	111061797	1	1958	1958	protein_coding	0.981174	0.409715	0.107131	0.0019	0.0241	0.0788382	0.0291	0.5468	0.0532187	0	NA	NA	7	7.1e-05	ENSP00000358786	0	0	0	0	0	0
ENSG00000177301.9	ENSG00000177301	KCNA2	1	111136202	111174096	3	3443	37894	protein_coding	0.966186	7.8548	10.8478	0	0.0086	0	0.0027	0.2894	0.00932965	0	0	NA	37	0.00106122	ENSP00000314520	0	1	0	0	0	0
ENSG00000177272.7	ENSG00000177272	KCNA3	1	111214310	111217655	1	3345	3345	protein_coding	0.88699	3.2709	5.77332	0.0029	0.01	0.29	0.0124	0.608	0.0203947	0	0	0.196	5	0.000449344	ENSP00000358784	0	0	0	0	0	0
ENSG00000143119.8	ENSG00000143119	CD53	1	111415775	111442550	8	1497	26775	protein_coding	0.946224	433.93	57762	0	0.0043	0	0.1058	0.5547	0.190734	3	0	0.061	90	0.0811554	ENSP00000271324	0	0	0	0	0	0
ENSG00000121931.11	ENSG00000121931	LRIF1	1	111489807	111506701	4	3471	16894	protein_coding	0.782316	15.4788	14.0337	0.0017	0.002	0.85	0.1791	0.3078	0.581871	0	0.074	NA	NA	0.00208565	NA	0	0	0	0	0	0
ENSG00000156171.10	ENSG00000156171	DRAM2	1	111659955	111682838	9	2237	22883	protein_coding	0.724926	47.5186	252.78	0	0	NA	0.0687	0.3495	0.196567	NA	0	0.295	1	0.00785136	ENSP00000286692	0	0	0	0	0	0
ENSG00000134255.9	ENSG00000134255	CEPT1	1	111682249	111727724	4	5296	45475	protein_coding	0.703985	14.934	17.7574	0	0.0054	0	0.0066	0.2667	0.0247469	0	0.03	0.076	47	0.00147899	ENSP00000349696	0	0	0	0	0	0
ENSG00000162777.12	ENSG00000162777	DENND2D	1	111729796	111747157	5	3202	17361	protein_coding	0.803391	21.2895	99.9182	0.001	0.0101	0.0990099	0.0507	0.4868	0.10415	NA	0.012	0.12	NA	0.00299754	NA	0	0	0	0	0	0
ENSG00000064886.9	ENSG00000064886	CHI3L2	1	111743393	111786062	13	2156	42669	protein_coding	0.941212	70.9905	12829.8	0.0038	0.0115	0.330435	NA	NA	NA	2	0	0.533	2	0.0118953	ENSP00000358763	0	0	0	0	0	0
ENSG00000134216.14	ENSG00000134216	CHIA	1	111833484	111863188	8	4242	29704	protein_coding	0.998761	127.163	32726	NA	NA	NA	0.0986	0.5322	0.185269	0	0	NA	3	0.0150277	ENSP00000341828	0	0	1	0	0	0
ENSG00000173947.9	ENSG00000173947	PIFO	1	111888910	111895635	5	3769	6725	protein_coding	0.86827	10.3404	180.001	0.0076	0.0114	0.666667	0.2276	0.4722	0.481999	3	0	NA	1	0.00131878	ENSP00000358753	0	1	0	0	0	0
ENSG00000085465.11	ENSG00000085465	OVGP1	1	111956936	111970399	11	2232	13463	protein_coding	0.946483	48.0883	6451.18	0.0073	0.0086	0.848837	0.245	0.5181	0.472882	4	0	0.245	4	0.00795717	ENSP00000358747	0	0	0	0	0	0
ENSG00000116455.9	ENSG00000116455	WDR77	1	111982512	111991998	10	2566	9486	protein_coding	0.467067	28.4184	571.901	0.0028	0.0168	0.166667	0.0589	0.384	0.153385	0	0.001	0.074	20	0.00444375	ENSP00000235090	0	1	0	0	0	0
ENSG00000116459.6	ENSG00000116459	ATP5F1	1	111991486	112005395	7	3149	13909	protein_coding	0.589391	98.4785	1278.94	0.0021	0.0035	0.6	0.1043	0.3906	0.267025	0	0	0.024	83	0.0139849	ENSP00000358737	0	0	0	0	0	0
ENSG00000143110.7	ENSG00000143110	C1orf162	1	112016414	112021134	3	2305	4720	protein_coding	0.939117	106.998	5529.79	0	0.0174	0	0.2635	0.5439	0.484464	4	0	0.03	NA	0.0174869	NA	0	0	0	0	0	0
ENSG00000121933.13	ENSG00000121933	ADORA3	1	112025970	112106584	2	1882	80614	protein_coding	0.892477	13.5756	34.6428	0.0014	0.0031	0.451613	0.2374	0.7426	0.319688	0	0.021	0.008	NA	0.00238502	NA	0	0	0	0	0	0
ENSG00000116473.10	ENSG00000116473	RAP1A	1	112084840	112259313	8	5016	174473	protein_coding	0.612137	42.7554	204.609	0	0	NA	0	0.2642	0	0	0.017	0.067	128	0.00445137	ENSP00000348786	0	1	1	0	0	0
ENSG00000197852.8	ENSG00000197852	FAM212B	1	112223252	112298446	2	5978	75194	protein_coding	0.869374	16.6653	233.06	0	0.0178	0	0.1221	0.7184	0.169961	0	0.001	NA	NA	0.00147951	NA	0	0	0	0	0	0
ENSG00000064703.7	ENSG00000064703	DDX20	1	112297867	112310638	3	4329	12771	protein_coding	0.931988	50.5775	207.469	0.005	0.0085	0.588235	0.0965	0.4891	0.197301	0	0.026	0.041	348	0.00590119	ENSP00000358716	0	1	0	0	0	0
ENSG00000171385.5	ENSG00000171385	KCND3	1	112313284	112531777	6	7390	218493	protein_coding	0.773871	11.9068	53.6031	0	0.0079	0	0.0026	0.6343	0.00409901	0	0	0.037	NA	0.000833141	NA	0	0	0	0	0	0
ENSG00000143079.10	ENSG00000143079	CTTNBP2NL	1	112938803	113006078	6	5891	67275	protein_coding	0.516835	9.78859	18.266	0.003	0.0108	0.277778	0.0533	0.4623	0.115293	0	NA	NA	NA	0.00088	NA	0	0	0	0	0	0
ENSG00000134245.13	ENSG00000134245	WNT2B	1	113009163	113072787	6	10873	63624	protein_coding	0.652727	3.96897	3.27171	0.0185	0.0691	0.267728	0.0232	0.5792	0.0400552	0	NA	NA	11	0.000155522	ENSP00000358698	0	0	0	0	0	0
ENSG00000007341.14	ENSG00000007341	ST7L	1	113066140	113163447	15	4513	97307	protein_coding	0.814057	11.4063	10.1167	0.0031	0.0025	1.24	0.0766	0.3887	0.197067	0	0	0.312	39	0.00128936	ENSP00000350734	0	0	0	0	0	0
ENSG00000116489.8	ENSG00000116489	CAPZA1	1	113161795	113214241	10	3010	52446	protein_coding	0.704709	95.7369	2262.48	0.0056	0.0209	0.267943	0.0178	0.3152	0.0564721	0	0	0.015	105	0.0139059	ENSP00000263168	0	0	1	0	0	0
ENSG00000155363.14	ENSG00000155363	MOV10	1	113215763	113243368	18	4671	27605	protein_coding	0.612695	32.3051	79.4966	0	0.0171	0	0.0442	0.4923	0.0897827	0	0.017	0.038	45	0.00355821	ENSP00000350028	0	0	0	0	0	0
ENSG00000155366.12	ENSG00000155366	RHOC	1	113243728	113250056	6	2193	6328	protein_coding	0.462001	111.95	1240.73	0	0.0278	0	0	0.5292	0	0	NA	NA	132	0.018649	ENSP00000285735	0	0	0	0	0	0
ENSG00000155367.11	ENSG00000155367	PPM1J	1	113252616	113258099	11	2463	5483	protein_coding	0.963901	41.5608	146.276	0.0028	0.0024	1.16667	0.0764	0.4539	0.168319	0	0	0.002	NA	0.00662189	NA	0	0	0	0	0	0
ENSG00000184599.9	ENSG00000184599	FAM19A3	1	113263041	113269857	5	1277	6816	protein_coding	0.982719	7.79225	19.0028	0.0054	0.0077	0.701299	0.3177	1.4989	0.211955	NA	0	NA	NA	0.0015111	NA	0	0	0	0	0	0
ENSG00000155380.7	ENSG00000155380	SLC16A1	1	113454469	113499635	5	4369	45166	protein_coding	0.646599	17.7943	112.265	0.0028	0.0048	0.583333	0.0772	0.562	0.137367	0	0	0.026	110	0.00206212	ENSP00000358640	1	0	0	0	0	0
ENSG00000198799.7	ENSG00000198799	LRIG2	1	113615831	113674882	18	11537	59051	protein_coding	0.418876	4.13853	0.934086	0.0032	0.0042	0.761905	0.0498	0.3929	0.12675	0	NA	NA	11	0.000145187	ENSP00000355396	0	0	0	0	0	0
ENSG00000081026.14	ENSG00000081026	MAGI3	1	113933371	114228545	22	6486	295174	protein_coding	0.593077	5.44461	3.17229	0.0038	0.0056	0.678571	0.0724	0.3884	0.186406	0	0.085	0.042	158	0.000442813	ENSP00000304604	0	0	0	0	0	0
ENSG00000116793.11	ENSG00000116793	PHTF1	1	114239453	114302111	12	4302	62658	protein_coding	0.811823	10.689	11.4665	0.0006	0.0051	0.117647	0.0349	0.4055	0.0860666	1	0.027	0.039	NA	0.00125351	NA	0	0	0	0	0	0
ENSG00000081019.9	ENSG00000081019	RSBN1	1	114304454	114355098	7	6614	50644	protein_coding	0.384587	6.73189	9.71339	0.0006	0.0082	0.0731707	0.0293	0.2146	0.136533	0	0	0.007	2	0.000536252	ENSP00000261441	0	0	0	0	0	0
ENSG00000134242.11	ENSG00000134242	PTPN22	1	114356433	114414381	21	3633	57948	protein_coding	0.944819	22.8515	39.4055	0.0022	0.0033	0.666667	0.1814	0.4737	0.382943	NA	0	0.06	33	0.00299927	ENSP00000352833	0	0	1	0	0	0
ENSG00000188761.7	ENSG00000188761	BCL2L15	1	114420790	114430169	2	4039	9379	protein_coding	0.948463	17.3691	145.854	0.0065	0.0061	1.06557	0.2043	0.4751	0.430015	2	0	0.106	NA	0.00212978	NA	0	0	0	0	0	0
ENSG00000134262.8	ENSG00000134262	AP4B1	1	114437370	114447823	10	2808	10453	protein_coding	0.561373	12.1054	10.7447	0.0014	0.0056	0.25	0.0482	0.4586	0.105102	0	0	0.042	63	0.00181843	ENSP00000256658	1	0	0	0	0	0
ENSG00000118655.4	ENSG00000118655	DCLRE1B	1	114447763	114456708	4	3936	8945	protein_coding	0.633765	4.89961	3.21964	0.0008	0.0111	0.0720721	0.1678	0.6205	0.270427	0	0.031	0.047	41	0.000610153	ENSP00000358576	0	1	0	0	0	0
ENSG00000163349.17	ENSG00000163349	HIPK1	1	114471814	114520426	16	8141	48612	protein_coding	0.551586	21.77	31.0285	0.0008	0.0064	0.125	0.012	0.2955	0.0406091	1	0.011	0.018	928	0.00134665	ENSP00000358571	0	0	0	0	0	0
ENSG00000116774.7	ENSG00000116774	OLFML3	1	114522063	114524876	2	2061	2813	protein_coding	0.830603	169.349	6807.18	0	0.0073	0	0.0288	0.4298	0.0670079	0	0	0.011	4	0.0287661	ENSP00000322273	0	0	0	0	0	0
ENSG00000134207.10	ENSG00000134207	SYT6	1	114631913	114696541	8	4445	64628	protein_coding	0.903688	1.17306	128.052	NA	NA	NA	0.0135	0.5798	0.0232839	0	NA	NA	NA	0.000133837	NA	0	0	0	0	0	0
ENSG00000197323.6	ENSG00000197323	TRIM33	1	114935399	115053781	20	8319	118382	protein_coding	0.468855	11.8223	9.39468	0.0009	0.0075	0.12	0.0194	0.3207	0.0604927	0	0	0.184	NA	0.000707609	NA	1	1	0	0	0	0
ENSG00000116752.5	ENSG00000116752	BCAS2	1	115110178	115124260	7	1292	14082	protein_coding	0.461882	35.1033	247.52	0	0.0042	0	0	0.6539	0	0	0	0.045	53	0.00679167	ENSP00000358554	0	0	0	0	0	0
ENSG00000175984.10	ENSG00000175984	DENND2C	1	115125469	115213043	21	6142	87574	protein_coding	0.851805	11.2577	46.3938	0.0015	0.0123	0.121951	0.0905	0.5185	0.174542	0	0	0.142	NA	0.000974105	NA	0	0	0	0	0	0
ENSG00000116748.15	ENSG00000116748	AMPD1	1	115215719	115238239	15	2377	22520	protein_coding	0.997317	142.261	9310.15	0.0075	0.0085	0.882353	0.0353	0.4958	0.0711981	0	0	NA	108	0.02293	ENSP00000430075	0	0	0	0	0	1
ENSG00000213281.4	ENSG00000213281	NRAS	1	115247090	115259515	7	4442	12425	protein_coding	0.798159	33.5927	17.8081	0	0.0054	0	0.0024	0.4173	0.00575126	0	0	0	195	0.00384545	ENSP00000358548	1	0	1	0	0	0
ENSG00000009307.11	ENSG00000009307	CSDE1	1	115259534	115301297	20	4147	41763	protein_coding	0.726132	380.084	11252.9	0.0006	0.0038	0.157895	0.0068	0.2375	0.0286316	0	0	0.001	29	0.0456825	ENSP00000407724	0	0	0	0	0	0
ENSG00000052723.7	ENSG00000052723	SIKE1	1	115312100	115323306	5	5501	11206	protein_coding	0.537919	10.3295	3.40285	0	0.0166	0	0.0398	0.6196	0.064235	NA	0	0.009	NA	0.000988037	NA	0	0	0	0	0	0
ENSG00000198765.7	ENSG00000198765	SYCP1	1	115397424	115537991	32	3490	140567	protein_coding	0.999475	22.3725	37.6311	0.005	0.0123	0.406504	0.1503	0.396	0.379545	0	0.008	NA	1	0.00300456	ENSP00000358531	0	0	0	0	0	0
ENSG00000134200.2	ENSG00000134200	TSHB	1	115572415	115576941	3	575	4526	protein_coding	0.999883	1127.2	2.65624e+06	0.0131	0	NA	0.0875	0.6218	0.14072	1	0	NA	8	0.246411	ENSP00000256592	1	0	0	0	0	0
ENSG00000134198.5	ENSG00000134198	TSPAN2	1	115590632	115632121	8	3169	41489	protein_coding	0.809619	30.0946	152.644	0.0021	0.0056	0.375	0.0316	0.4296	0.0735568	NA	0	0.023	NA	0.00425932	NA	0	0	0	0	0	0
ENSG00000134259.3	ENSG00000134259	NGF	1	115828539	115880857	3	1044	52318	protein_coding	0.773326	14.8765	72.7546	0.0038	0.0275	0.138182	0.081	0.5013	0.16158	0	0	NA	NA	0.00300477	NA	0	1	0	0	0	0
ENSG00000173218.10	ENSG00000173218	VANGL1	1	116184574	116240845	8	8683	56271	protein_coding	0.557943	4.45331	2.22119	0.0009	0.0134	0.0671642	0.0214	0.5329	0.0401576	0	NA	NA	11	0.000251141	ENSP00000310800	1	0	0	0	0	0
ENSG00000118729.10	ENSG00000118729	CASQ2	1	116242628	116311402	11	2663	68774	protein_coding	0.933785	320.001	25339.2	0.0079	0.0173	0.456647	0.0605	0.5987	0.101052	0	0	NA	57	0.0492673	ENSP00000261448	1	0	0	0	0	0
ENSG00000177551.5	ENSG00000177551	NHLH2	1	116378998	116386538	1	7225	7540	protein_coding	0.926406	0.923663	1.42783	0	0.0436	0	0.0087	0.9869	0.00881548	NA	0	NA	NA	6.65e-05	NA	0	0	0	0	0	0
ENSG00000163393.8	ENSG00000163393	SLC22A15	1	116519119	116612675	12	4708	93556	protein_coding	0.582576	4.39011	9.2789	0.0008	0.0137	0.0583942	0.0329	0.4658	0.0706312	0	0.024	0.275	NA	0.000480634	NA	0	0	0	0	0	0
ENSG00000173212.4	ENSG00000173212	MAB21L3	1	116654376	116677861	7	3222	23485	protein_coding	0.909643	3.71463	11.9842	0.0053	0.017	0.311765	0.1426	0.8437	0.169017	0	0	NA	NA	0.000520368	NA	0	0	0	0	0	0
ENSG00000163399.11	ENSG00000163399	ATP1A1	1	116915290	116952883	23	3740	37593	protein_coding	0.796847	507.539	145200	0.0005	0.0066	0.0757576	0.0185	0.5412	0.0341833	0	0	0.01	145	0.0653577	ENSP00000295598	0	1	0	0	0	0
ENSG00000116815.11	ENSG00000116815	CD58	1	117057157	117113661	5	1323	56504	protein_coding	0.82191	42.4391	98.6093	0.015	0.0205	0.731707	NA	NA	NA	5	0	0.014	NA	0.0081619	NA	0	0	1	0	0	0
ENSG00000143061.13	ENSG00000143061	IGSF3	1	117117031	117210375	11	7243	93344	protein_coding	0.786285	15.5973	66.9899	0.0014	0.0296	0.0472973	0.0343	0.7551	0.0454244	0	0	0.001	NA	0.00111928	NA	0	0	0	0	0	0
ENSG00000203864.1	ENSG00000203864	C1orf137	1	117236734	117249225	4	382	12491	protein_coding	0.867644	0.00887522	0.000860298	0	0.0097	0	NA	NA	NA	6	NA	NA	NA	2e-06	NA	0	0	0	0	0	0
ENSG00000116824.4	ENSG00000116824	CD2	1	117297007	117311850	5	1604	14843	protein_coding	0.90699	27.7586	554.164	0.0027	0.0065	0.415385	0.3893	0.7538	0.51645	4	0	0	12	0.00510653	ENSP00000358490	0	0	0	0	0	0
ENSG00000134247.9	ENSG00000134247	PTGFRN	1	117452679	117532980	9	6169	80301	protein_coding	0.696067	35.209	106.598	0.0041	0.0129	0.317829	0.0522	0.5982	0.0872618	0	0	0.077	NA	0.00302075	NA	0	0	0	0	0	0
ENSG00000134256.8	ENSG00000134256	CD101	1	117544382	117579167	10	3537	34785	protein_coding	0.748262	2.13472	3.89318	0.0094	0.0148	0.635135	0.1851	0.4985	0.371314	NA	0	0.484	NA	0.000283472	NA	0	0	0	0	0	0
ENSG00000116830.7	ENSG00000116830	TTF2	1	117602925	117650075	23	9439	47150	protein_coding	0.855557	11.662	6.55019	0.0044	0.0053	0.830189	0.1858	0.4892	0.379804	0	NA	NA	3	0.000582115	ENSP00000358478	0	0	0	0	0	0
ENSG00000134253.5	ENSG00000134253	TRIM45	1	117653682	117665209	6	3509	11527	protein_coding	0.600362	7.7167	20.122	0.0082	0.0123	0.666667	0.1168	0.6464	0.180693	0	0	0	NA	0.00103223	NA	0	0	0	0	0	0
ENSG00000134258.12	ENSG00000134258	VTCN1	1	117686209	117753556	6	2606	67347	protein_coding	0.94491	18.2264	570.641	0.0032	0.0095	0.336842	0.078	0.5505	0.141689	2	0.059	NA	NA	0.00282883	NA	0	0	1	1	0	0
ENSG00000198162.8	ENSG00000198162	MAN1A2	1	117910071	118071494	13	8563	161423	protein_coding	0.336207	8.06329	4.2129	0.0038	0.0054	0.703704	0.0303	0.4096	0.0739746	0	0.026	0.116	3	0.000464067	ENSP00000348959	0	1	0	0	0	0
ENSG00000183508.4	ENSG00000183508	FAM46C	1	118148556	118170994	2	5749	22438	protein_coding	0.918987	50.9611	370.856	0.0023	0.034	0.0676471	0.0209	0.5562	0.0375764	0	0.027	0.002	1	0.00469408	ENSP00000358458	0	0	0	0	0	0
ENSG00000196505.6	ENSG00000196505	GDAP2	1	118406107	118472253	14	8814	66146	protein_coding	0.463517	2.42354	0.433454	0.0019	0.0069	0.275362	0.0257	0.4938	0.0520454	0	NA	NA	42	0.000133625	ENSP00000358451	0	0	0	0	0	0
ENSG00000065183.11	ENSG00000065183	WDR3	1	118472343	118509165	27	9947	36822	protein_coding	0.720783	20.0819	44.3764	0.0023	0.0117	0.196581	0.0471	0.6059	0.0777356	0	NA	NA	541	0.000918839	ENSP00000308179	0	0	0	0	0	0
ENSG00000155761.9	ENSG00000155761	SPAG17	1	118496484	118727846	49	6875	231362	protein_coding	0.96027	11.7917	43.8475	0.0068	0.0138	0.492754	0.1691	0.5944	0.284489	0	0.028	0.251	NA	0.000900201	NA	0	0	0	0	0	0
ENSG00000092607.9	ENSG00000092607	TBX15	1	119425669	119532179	8	3496	106510	protein_coding	0.937856	45.3297	687.291	0.001	0.0116	0.0862069	0.0048	0.2922	0.0164271	0	0	NA	NA	0.00607012	NA	1	1	0	0	0	0
ENSG00000116874.7	ENSG00000116874	WARS2	1	119573839	119683294	6	2805	109455	protein_coding	0.440192	5.79896	3.2238	0	0.021	0	0.0754	0.5059	0.149041	0	0	0.403	253	0.000872079	ENSP00000235521	0	0	0	0	0	0
ENSG00000116882.10	ENSG00000116882	HAO2	1	119911402	119936753	9	1659	25351	protein_coding	0.988423	81.1539	2628.92	0.0012	0.0085	0.141176	0.1883	0.5098	0.369361	0	0	NA	145	0.0147793	ENSP00000316339	0	0	0	0	0	0
ENSG00000203859.5	ENSG00000203859	HSD3B2	1	119957554	119965658	4	1779	8104	protein_coding	0.999147	1200.04	1.04842e+06	0.0052	0.0191	0.272251	0.1975	0.7083	0.278837	7	0.13	NA	105	0.214088	ENSP00000358424	1	0	0	0	0	0
ENSG00000203857.5	ENSG00000203857	HSD3B1	1	120049821	120057681	4	1676	7860	protein_coding	0.987603	7.03293	44.5801	0.0039	0.0184	0.211957	0.1843	0.7584	0.243012	4	0	NA	101	0.00127592	ENSP00000358421	0	0	0	0	0	0
ENSG00000143067.4	ENSG00000143067	ZNF697	1	120162045	120190396	3	5038	28351	protein_coding	0.622801	4.57337	4.25071	0.0022	0.0117	0.188034	0.0498	0.6867	0.0725208	3	0.016	0.171	339	0.000473559	ENSP00000396857	0	0	0	0	0	0
ENSG00000092621.7	ENSG00000092621	PHGDH	1	120202421	120286838	11	3169	84417	protein_coding	0.598837	25.5379	186.942	0.0008	0.0129	0.0620155	0.0302	0.5289	0.0570996	0	0	0.307	55	0.0036084	ENSP00000358417	1	1	0	0	0	0
ENSG00000134240.7	ENSG00000134240	HMGCS2	1	120290619	120311528	10	2418	20909	protein_coding	0.975469	474.615	58696.3	0.0018	0.0098	0.183673	0.055	0.5115	0.107527	2	0	NA	155	0.0761799	ENSP00000358414	1	0	0	0	0	0
ENSG00000134193.10	ENSG00000134193	REG4	1	120336641	120354283	3	2324	17642	protein_coding	0.994129	109.18	7593.07	0.0025	0	NA	0.2168	0.5541	0.391265	4	0	0.096	NA	0.0177574	NA	0	0	0	0	0	0
ENSG00000134249.6	ENSG00000134249	ADAM30	1	120436156	120439118	1	2962	2962	protein_coding	0.999834	20.0259	53.38	0.0018	0.0165	0.109091	0.3104	0.9078	0.341926	3	0	NA	1	0.00292948	ENSP00000358407	0	0	0	0	0	0
ENSG00000134250.13	ENSG00000134250	NOTCH2	1	120454176	120612240	34	11355	158064	protein_coding	0.61205	26.913	56.6054	NA	NA	NA	0.0377	0.5777	0.0652588	0	0	0.011	72	0.000972424	ENSP00000256646	1	1	1	0	0	0
ENSG00000188610.8	ENSG00000188610	FAM72B	1	120837756	120855681	4	2370	17925	protein_coding	0.943489	3.94226	2.07904	0.007	0	NA	0.0612	0.2707	0.226081	12	0	NA	NA	0.000636969	NA	0	0	0	0	0	0
ENSG00000198019.8	ENSG00000198019	FCGR1B	1	120926979	120935937	5	1039	8958	protein_coding	0.966033	16.4813	257.923	NA	NA	NA	0.2734	0.6333	0.431707	12	0	0.007	10	0.00333021	ENSP00000358391	0	0	1	1	0	0
ENSG00000236334.1	ENSG00000236334	PPIAL4G	1	143767144	143767881	1	737	737	protein_coding	0.754928	0.531786	0.41822	NA	NA	NA	0.1469	0.3468	0.423587	NA	0.019	NA	219	0.000112918	ENSP00000393845	0	0	0	0	0	0
ENSG00000215784.4	ENSG00000215784	FAM72D	1	143896452	143913143	4	2389	16691	protein_coding	0.961547	4.98745	4.22603	0.007	0.0065	1.07692	0.065	0.2798	0.232309	NA	0	NA	NA	0.000804168	NA	0	0	0	0	0	0
ENSG00000162825.12	ENSG00000162825	NBPF8	1	144146808	144224481	91	11600	77673	protein_coding	0.516718	0.108939	0.00225063	NA	NA	NA	NA	NA	NA	12	NA	NA	NA	3.78e-06	NA	0	0	0	0	0	0
ENSG00000231360.2	ENSG00000231360	AL592284.1	1	144339738	144521058	2	1071	181320	protein_coding	0.510638	2.26793	2.32501	NA	NA	NA	NA	NA	NA	NA	0	NA	NA	0.000455718	NA	0	0	0	0	0	0
ENSG00000255854.1	ENSG00000255854	PPIAL4B	1	144363462	144364246	1	784	784	protein_coding	0.702358	0.31102	0.108105	NA	NA	NA	0.1389	0.377	0.368435	NA	0	NA	222	6.55e-05	ENSP00000443989	0	0	0	0	0	0
ENSG00000168614.13	ENSG00000168614	NBPF9	1	144811744	144830413	15	3665	18669	protein_coding	0.601942	5.60708	1.93238	NA	NA	NA	NA	NA	NA	8	0	0.148	NA	0.000730847	NA	0	0	0	0	0	0
ENSG00000178104.15	ENSG00000178104	PDE4DIP	1	144836157	145076186	17	8807	240029	protein_coding	0.926652	139.743	1849.57	0.0069	0.0162	0.425926	0.2767	0.9045	0.305915	0	0	0.011	2	0.00773941	ENSP00000358363	0	0	0	0	0	0
ENSG00000268172.1	ENSG00000268172	AL590452.1	1	144989309	144991365	1	2056	2056	protein_coding	0.707898	0.368442	0.0533743	NA	NA	NA	NA	NA	NA	NA	0	NA	NA	6.27e-05	NA	0	0	0	0	0	0
ENSG00000213240.7	ENSG00000213240	NOTCH2NL	1	145209119	145291972	6	5030	82853	protein_coding	0.63279	4.74135	1.18395	0.1163	0.123	0.945528	NA	NA	NA	10	0	0.697	NA	0.00049183	NA	0	0	0	0	0	0
ENSG00000163386.16	ENSG00000163386	NBPF10	1	145289772	145370303	84	10613	80531	protein_coding	0.475627	8.20943	4.71061	NA	NA	NA	NA	NA	NA	10	NA	NA	NA	0.000335867	NA	0	0	0	0	0	0
ENSG00000168509.13	ENSG00000168509	HFE2	1	145413095	145417545	4	2124	4450	protein_coding	0.982304	114.017	2395.82	0.0033	0.0058	0.568966	0.0672	0.6082	0.11049	0	0.02	NA	NA	0.0192016	NA	0	0	0	0	0	0
ENSG00000117289.7	ENSG00000117289	TXNIP	1	145438469	145442635	8	2919	4166	protein_coding	0.57688	1101.32	401535	NA	NA	NA	0.0168	0.5129	0.0327549	0	0	0	7	0.162281	ENSP00000358323	0	0	0	0	0	0
ENSG00000121851.8	ENSG00000121851	POLR3GL	1	145456236	145470388	3	1600	14152	protein_coding	0.488218	49.7375	389.451	0.0021	0.0161	0.130435	0.0206	0.5324	0.0386927	3	0.021	0	9	0.00913538	ENSP00000358320	0	0	0	0	0	0
ENSG00000181039.7	ENSG00000181039	ANKRD34A	1	145470508	145475646	4	3607	5138	protein_coding	0.922622	11.8736	23.4405	NA	NA	NA	0.0164	0.4338	0.0378054	4	0.03	0.126	NA	0.00156534	NA	0	0	0	0	0	0
ENSG00000152022.7	ENSG00000152022	LIX1L	1	145477085	145501669	6	3973	24584	protein_coding	0.499361	25.3779	120.131	NA	NA	NA	0.0171	0.4168	0.0410269	0	0.034	0.03	NA	0.00314339	NA	0	0	0	0	0	0
ENSG00000131795.8	ENSG00000131795	RBM8A	1	145507598	145513536	6	4913	5938	protein_coding	0.437539	22.3841	184.139	NA	NA	NA	0.0006	0.5934	0.00101112	0	NA	NA	199	0.00237004	ENSP00000333001	1	0	0	0	0	0
ENSG00000131779.6	ENSG00000131779	PEX11B	1	145516252	145523730	4	1736	7478	protein_coding	0.448528	28.8482	94.4229	0	0.0033	0	0.0394	0.3106	0.126851	0	0	0	12	0.00517507	ENSP00000358312	0	1	0	0	0	0
ENSG00000143127.8	ENSG00000143127	ITGA10	1	145524891	145543868	30	5239	18977	protein_coding	0.933368	81.0829	1082.3	0.0026	0.0088	0.295455	0.0696	0.4006	0.173739	0	0	0.077	6	0.00812692	ENSP00000358310	0	0	0	0	0	0
ENSG00000198483.8	ENSG00000198483	ANKRD35	1	145549230	145568526	14	3328	19296	protein_coding	0.893921	47.0841	330.109	0.0105	0.0146	0.719178	0.1005	0.5373	0.187046	NA	0	0.554	7	0.00649058	ENSP00000347802	0	0	0	0	0	0
ENSG00000131788.11	ENSG00000131788	PIAS3	1	145575233	145586546	14	2887	11313	protein_coding	0.525235	31.5293	62.9898	0.0008	0.0126	0.0634921	0.0156	0.3861	0.040404	1	0	0.009	125	0.00467199	ENSP00000376765	0	0	0	0	0	0
ENSG00000186364.7	ENSG00000186364	NUDT17	1	145586115	145589439	8	1465	3324	protein_coding	0.606878	4.63036	10.2225	0.0169	0.0033	5.12121	0.1944	0.4056	0.47929	4	NA	NA	NA	0.000870413	NA	0	0	0	0	0	0
ENSG00000186141.4	ENSG00000186141	POLR3C	1	145592605	145611025	15	1836	18420	protein_coding	0.65021	20.9927	17.9093	0	0.0035	0	0.0328	0.5648	0.0580737	0	0.026	0	223	0.00371111	ENSP00000334564	0	0	1	0	0	0
ENSG00000121848.9	ENSG00000121848	RNF115	1	145611036	145696218	9	9108	85182	protein_coding	0.499046	20.5915	73.9226	NA	NA	NA	0.0355	0.3045	0.116585	0	NA	NA	33	0.00108307	ENSP00000358297	0	0	0	0	0	0
ENSG00000117281.11	ENSG00000117281	CD160	1	145695798	145715614	3	3386	19816	protein_coding	0.896147	3.71307	24.5738	0	0.0216	0	0.2211	0.3482	0.63498	5	0.008	0.046	1	0.000506334	ENSP00000235933	0	0	1	0	0	0
ENSG00000174827.9	ENSG00000174827	PDZK1	1	145726918	145764074	9	2075	37156	protein_coding	0.980658	83.9357	4722.97	0.0039	0.0079	0.493671	0.1245	0.6188	0.201196	8	0	0	6	0.0142476	ENSP00000342143	0	0	0	0	0	0
ENSG00000117262.14	ENSG00000117262	GPR89A	1	145764411	145827103	7	2692	62692	protein_coding	0.490055	7.9894	4.50637	0.0361	0.0815	0.442945	0.0153	0.6062	0.0252392	12	0.036	0.019	14	0.00122421	ENSP00000319673	0	0	0	0	0	0
ENSG00000196644.8	ENSG00000196644	GPR89C	1	145883868	145924373	7	2692	40505	protein_coding	0.705528	0.315927	0.0384588	NA	NA	NA	0.0199	0.5867	0.0339185	12	NA	NA	15	4.84e-05	ENSP00000399563	0	0	0	0	0	0
ENSG00000152042.13	ENSG00000152042	NBPF11	1	146032647	146082765	25	5617	50118	protein_coding	0.468691	0.495081	0.0288173	NA	NA	NA	NA	NA	NA	6	0	NA	NA	4.66e-05	NA	0	0	0	0	0	0
ENSG00000186275.7	ENSG00000186275	NBPF12	1	146373546	146467744	82	12373	94198	protein_coding	0.837351	6.37455	56.9593	NA	NA	NA	NA	NA	NA	8	0.02	NA	NA	0.00019433	NA	0	0	0	0	0	0
ENSG00000131791.6	ENSG00000131791	PRKAB2	1	146626685	146644129	8	5409	17444	protein_coding	0.671515	33.0052	124.03	0.0038	0.0036	1.05556	0.0131	0.4497	0.0291305	0	0	0.137	3	0.00321448	ENSP00000254101	0	0	0	0	0	0
ENSG00000131781.8	ENSG00000131781	FMO5	1	146646930	146714700	9	2623	67770	protein_coding	0.931578	37.8519	1730.02	0.0027	0.0063	0.428571	0.0919	0.5085	0.180728	NA	0	0.207	2	0.00587413	ENSP00000254090	0	0	0	0	0	0
ENSG00000131778.13	ENSG00000131778	CHD1L	1	146714291	146767443	23	2944	53152	protein_coding	0.487529	23.9465	105.134	0.0037	0.0143	0.258741	0.0842	0.5235	0.16084	0	0.003	0.45	264	0.00351125	ENSP00000358262	0	0	0	0	0	0
ENSG00000116128.5	ENSG00000116128	BCL9	1	147013182	147098017	10	6268	84835	protein_coding	0.617231	13.0583	21.6156	0.001	0.003	0.333333	0.0237	0.2171	0.109166	0	0.012	0.26	NA	0.0011058	NA	0	0	0	0	0	0
ENSG00000162836.7	ENSG00000162836	ACP6	1	147101453	147142618	10	6916	41165	protein_coding	0.575239	5.48398	16.1587	0.0034	0.0027	1.25926	0.1427	0.5096	0.280024	0	NA	NA	5	0.000415212	ENSP00000358241	0	0	0	0	0	0
ENSG00000143140.6	ENSG00000143140	GJA5	1	147228332	147245484	2	3175	17152	protein_coding	0.773258	20.4689	251.132	NA	NA	NA	0.0985	0.8029	0.12268	0	0	NA	NA	0.00289797	NA	0	1	0	0	0	0
ENSG00000121634.4	ENSG00000121634	GJA8	1	147374946	147381393	2	1362	6447	protein_coding	0.999245	5.56467	3.71359	0.0029	0.0079	0.367089	0.0548	0.7917	0.0692181	0	0.051	NA	NA	0.00106335	NA	1	0	0	0	0	0
ENSG00000188092.10	ENSG00000188092	GPR89B	1	147400506	147465753	7	2694	65247	protein_coding	0.469274	0.570147	0.0220923	0.0382	0.0527	0.724858	0.0153	0.5961	0.0256668	0	0	0	15	8.73e-05	ENSP00000358233	0	0	0	0	0	0
ENSG00000203836.7	ENSG00000203836	NBPF24	1	147574428	147634886	23	5129	60458	protein_coding	0.360359	0.26841	0.0123308	NA	NA	NA	NA	NA	NA	11	0	NA	NA	2.74e-05	NA	0	0	0	0	0	0
ENSG00000269647.1	ENSG00000269647	BX842679.1	1	147631967	147632428	1	461	461	protein_coding	NA	0	0	NA	NA	NA	NA	NA	NA	NA	NA	NA	NA	0	NA	0	0	0	0	0	0
ENSG00000255963.1	ENSG00000255963	PPIAL4A	1	147954635	147955419	1	784	784	protein_coding	0.917624	0.0325774	0.00568004	NA	NA	NA	0.1389	0.377	0.368435	NA	NA	NA	221	6.87e-06	ENSP00000439146	0	0	0	0	0	0
ENSG00000122497.13	ENSG00000122497	NBPF14	1	148003642	148025863	22	3667	22221	protein_coding	0.540325	7.70965	14.6168	NA	NA	NA	NA	NA	NA	10	0	0.011	NA	0.00100409	NA	0	0	0	0	0	0
ENSG00000256374.1	ENSG00000256374	PPIAL4D	1	148201752	148202536	1	784	784	protein_coding	0.946615	0.0642102	0.0116495	NA	NA	NA	0.1444	0.3507	0.411748	NA	NA	NA	219	1.35e-05	ENSP00000439444	0	0	0	0	0	0
ENSG00000203832.6	ENSG00000203832	NBPF20	1	148250249	148347506	111	15579	97257	protein_coding	0.479816	0.766552	0.281398	NA	NA	NA	NA	NA	NA	11	0	NA	NA	1.37e-05	NA	0	0	0	0	0	0
ENSG00000243452.3	ENSG00000243452	NBPF15	1	148555979	148596267	21	4686	40288	protein_coding	0.511675	5.31269	3.58736	NA	NA	NA	NA	NA	NA	NA	0.142	0	NA	0.000583495	NA	0	0	0	0	0	0
ENSG00000203827.7	ENSG00000203827	NBPF16	1	148739443	148758311	16	3814	18868	protein_coding	0.535481	1.84845	0.975309	NA	NA	NA	NA	NA	NA	11	0	NA	NA	0.000235097	NA	0	0	0	0	0	0
ENSG00000203818.6	ENSG00000203818	HIST2H3PS2	1	149400131	149400542	1	411	411	protein_coding	0.879593	5.5945	19.0984	NA	NA	NA	0.0112	0.877	0.0127708	10	NA	NA	NA	0.00125276	NA	0	0	0	0	0	0
ENSG00000203817.5	ENSG00000203817	FAM72C	1	149438750	149459549	2	1241	20799	protein_coding	0.952625	1.40821	0.62155	NA	NA	NA	0.0981	0.3796	0.25843	12	NA	NA	NA	0.000275157	NA	0	0	0	0	0	0
ENSG00000198161.5	ENSG00000198161	PPIAL4C	1	149553003	149553787	1	784	784	protein_coding	0.736732	0.00536406	0.000657214	NA	NA	NA	0.1389	0.377	0.368435	12	NA	NA	222	1.13e-06	ENSP00000358224	0	0	0	0	0	0
ENSG00000203815.2	ENSG00000203815	AL358813.2	1	149675978	149676609	1	631	631	protein_coding	0.709896	3.16937	2.38009	NA	NA	NA	NA	NA	NA	12	0.017	NA	NA	0.000684835	NA	0	0	0	0	0	0
ENSG00000150337.9	ENSG00000150337	FCGR1A	1	149754227	149764074	6	2174	9847	protein_coding	0.965797	26.5869	683.99	0.0058	0.0076	0.763158	0.2411	0.5848	0.412278	6	0	0.151	11	0.00444318	ENSP00000358165	0	0	1	0	0	0
ENSG00000203814.5	ENSG00000203814	HIST2H2BF	1	149754245	149783928	2	1045	29683	protein_coding	0.849654	14.142	504.929	0.0388	0.1934	0.20062	0	1.2628	0	5	0	0.569	119	0.00284297	ENSP00000445831	0	0	0	0	0	0
ENSG00000183598.3	ENSG00000183598	HIST2H3D	1	149784826	149785236	1	410	410	protein_coding	0.709642	0.968865	1.78496	NA	NA	NA	0.0018	1.8146	0.000991954	4	0.122	NA	110	0.000217195	ENSP00000333277	0	0	0	0	0	0
ENSG00000183941.8	ENSG00000183941	HIST2H4A	1	149804221	149811339	2	1694	7118	protein_coding	0.868029	0.0133446	0.00849905	NA	NA	NA	NA	NA	NA	NA	NA	NA	180	2.41e-06	ENSP00000358162	0	0	0	0	0	0
ENSG00000183558.5	ENSG00000183558	HIST2H2AA3	1	149813505	149814478	1	973	973	protein_coding	0.88078	13.624	182.252	NA	NA	NA	0	1.1531	0	3	0.002	NA	138	0.00277526	ENSP00000358158	0	0	0	0	0	0
ENSG00000203812.2	ENSG00000203812	HIST2H2AA4	1	149822643	149823191	1	548	548	protein_coding	0.981365	0.916885	36.7806	0	0.0122	0	0	1.1531	0	10	NA	NA	138	0.000200865	ENSP00000358155	0	0	0	0	0	0
ENSG00000182217.7	ENSG00000182217	HIST2H4B	1	149825607	149832714	2	1694	7107	protein_coding	0.90769	0.0169081	0.00779377	NA	NA	NA	0.0042	4.1842	0.00100378	12	NA	NA	175	3.06e-06	ENSP00000358153	0	0	0	0	0	0
ENSG00000184678.8	ENSG00000184678	HIST2H2BE	1	149856010	149858232	1	2222	2222	protein_coding	0.730183	80.1738	3750.25	NA	NA	NA	NA	NA	NA	4	0	0	120	0.0132896	ENSP00000358151	0	0	1	0	0	0
ENSG00000184260.4	ENSG00000184260	HIST2H2AC	1	149858525	149858961	1	436	436	protein_coding	0.812601	6.70185	63.2418	0	0.0243	0	0	1.3804	0	3	0.052	0	146	0.00149527	ENSP00000332194	0	0	0	0	0	0
ENSG00000178096.8	ENSG00000178096	BOLA1	1	149859440	149872351	3	1093	12911	protein_coding	0.322217	12.2946	7.89138	0.0032	0	NA	0.1106	0.7867	0.140587	0	0	0.172	66	0.00246027	ENSP00000358146	0	0	0	0	0	0
ENSG00000159164.5	ENSG00000159164	SV2A	1	149874870	149889434	13	4403	14564	protein_coding	0.961565	79.5778	1207.56	0.0007	0.0058	0.12069	0.0056	0.502	0.0111554	0	0	0.011	NA	0.00916948	NA	0	1	0	0	0	0
ENSG00000143368.9	ENSG00000143368	SF3B4	1	149895209	149900236	6	2079	5027	protein_coding	0.488993	48.3055	274.022	0	0.0129	0	0.0025	0.4128	0.0060562	0	0.003	0	69	0.00819668	ENSP00000271628	1	0	0	0	0	0
ENSG00000014914.15	ENSG00000014914	MTMR11	1	149900543	149908791	13	3319	8248	protein_coding	0.831846	54.2688	1322.91	0.0014	0.0079	0.177215	0.0781	0.4357	0.179252	1	0	0.019	3	0.007494	ENSP00000391668	0	0	0	0	0	0
ENSG00000163113.10	ENSG00000163113	OTUD7B	1	149909705	149982625	12	8866	72920	protein_coding	0.75043	12.4307	19.6247	NA	NA	NA	0.0428	0.3384	0.126478	0	NA	NA	NA	0.000678781	NA	0	0	1	0	0	0
ENSG00000136631.8	ENSG00000136631	VPS45	1	150039369	150117505	15	2775	78136	protein_coding	0.378142	11.3239	7.04382	0.0008	0.0063	0.126984	0.0145	0.3764	0.0385228	0	0	0.015	45	0.00170757	ENSP00000358126	0	0	0	0	0	0
ENSG00000023902.9	ENSG00000023902	PLEKHO1	1	150121373	150136916	4	3739	15543	protein_coding	0.789216	99.0948	1089.25	0.0023	0.009	0.255556	0.0518	0.4874	0.106278	0	0.036	0.146	NA	0.012752	NA	0	0	0	0	0	0
ENSG00000143401.10	ENSG00000143401	ANP32E	1	150190717	150208504	7	3446	17787	protein_coding	0.81602	63.138	137.943	0	0.0335	0	0.025	0.6921	0.0361219	0	0.001	0.091	161	0.00852606	ENSP00000324074	0	0	0	0	0	0
ENSG00000118298.6	ENSG00000118298	CA14	1	150229554	150237478	11	2392	7924	protein_coding	0.827531	3.22651	55.7069	0.0088	0.0131	0.671756	0.0951	0.4342	0.219023	0	0	0.016	1	0.000520274	ENSP00000358107	0	0	0	0	0	0
ENSG00000117362.8	ENSG00000117362	APH1A	1	150237804	150241980	6	2347	4176	protein_coding	0.400893	70.7574	394.839	0	0.0073	0	0.0036	0.1986	0.0181269	0	0	0.002	6	0.01149	ENSP00000358105	0	1	0	0	0	0
ENSG00000118292.4	ENSG00000118292	C1orf54	1	150240600	150253327	8	1243	12727	protein_coding	0.682075	27.7814	72.0443	0.0096	0.0088	1.09091	0.2466	0.5036	0.489674	0	0	0	NA	0.00542328	NA	0	0	0	0	0	0
ENSG00000159208.11	ENSG00000159208	C1orf51	1	150254953	150259505	3	1800	4552	protein_coding	0.752806	16.3814	116.892	0.0063	0.0089	0.707865	0.1182	0.5526	0.213898	2	0	0.01	11	0.00291564	ENSP00000290363	0	0	0	0	0	0
ENSG00000187145.10	ENSG00000187145	MRPS21	1	150266289	150281414	2	1461	15125	protein_coding	0.434406	58.3057	204.254	NA	NA	NA	0.0459	0.9408	0.0487883	0	0	0.089	78	0.0109674	ENSP00000312395	0	0	0	0	0	0
ENSG00000117360.8	ENSG00000117360	PRPF3	1	150293925	150325671	13	2582	31746	protein_coding	0.427381	23.3804	46.0526	0	0.0099	0	0.0021	0.3488	0.00602064	0	0	0.022	126	0.00365165	ENSP00000315379	0	1	0	0	0	0
ENSG00000163125.11	ENSG00000163125	RPRD2	1	150335567	150449042	10	7595	113475	protein_coding	0.41355	10.7081	6.7096	0.0023	0.0043	0.534884	0.045	0.2628	0.171233	0	0.041	0.088	13	0.000723958	ENSP00000358064	0	0	0	0	0	0
ENSG00000143374.10	ENSG00000143374	TARS2	1	150459887	150480078	18	2711	20191	protein_coding	0.624109	23.9795	15.1761	0.0007	0.0044	0.159091	0.0932	0.4862	0.191691	0	0.018	0.064	474	0.0036656	ENSP00000358060	0	0	0	0	0	0
ENSG00000143369.10	ENSG00000143369	ECM1	1	150480538	150486265	6	3060	5727	protein_coding	0.957469	532.286	154439	0.0074	0.0026	2.84615	0.196	0.484	0.404959	4	0	0.449	5	0.0766615	ENSP00000358045	1	0	1	0	0	0
ENSG00000143382.9	ENSG00000143382	ADAMTSL4	1	150521884	150533413	19	4178	11529	protein_coding	0.57219	46.6582	702.188	0.0035	0.0147	0.238095	0.1276	0.507	0.251677	0	0	0.18	6	0.0055852	ENSP00000271643	1	0	0	0	0	0
ENSG00000203804.3	ENSG00000203804	ADAMTSL4-AS1	1	150533480	150533969	1	489	489	protein_coding	0.897072	4.68631	14.3428	NA	NA	NA	NA	NA	NA	3	0	NA	NA	0.00103748	NA	0	0	0	0	0	0
ENSG00000143384.8	ENSG00000143384	MCL1	1	150547032	150552066	3	3929	5034	protein_coding	0.563819	228.604	28133.6	0.0026	0.0226	0.115044	0.1115	0.7194	0.15499	0	0	0.032	5	0.0285486	ENSP00000358022	0	0	0	0	0	0
ENSG00000143420.13	ENSG00000143420	ENSA	1	150573327	150602088	3	2815	28761	protein_coding	0.418719	47.5473	219.57	0.0177	0.0503	0.351889	0.0075	0.146	0.0513699	0	0	0.029	44	0.00713013	ENSP00000341743	0	0	0	0	0	0
ENSG00000143457.6	ENSG00000143457	GOLPH3L	1	150618701	150669630	5	2994	50929	protein_coding	0.486557	15.0099	24.8677	0	0.0096	0	0.0252	0.4167	0.0604752	1	0	0.146	22	0.00218542	ENSP00000271732	0	0	0	0	0	0
ENSG00000143452.11	ENSG00000143452	HORMAD1	1	150670536	150693364	15	1864	22828	protein_coding	0.99572	44.3484	150.965	0.0059	0.0059	1	0.1598	0.4787	0.333821	0	0	0.022	19	0.00779221	ENSP00000355167	0	0	0	0	0	0
ENSG00000163131.6	ENSG00000163131	CTSS	1	150702672	150738433	8	4099	35761	protein_coding	0.9315	160.695	7616.2	0.0044	0.0068	0.647059	0.1487	0.5492	0.270757	1	0	0.101	85	0.0195105	ENSP00000357981	0	0	1	1	0	0
ENSG00000143387.8	ENSG00000143387	CTSK	1	150768684	150780799	8	1684	12115	protein_coding	0.816998	310.386	179351	0.0053	0.0047	1.12766	0.0765	0.3931	0.194607	1	0	0.671	35	0.0561889	ENSP00000271651	0	0	1	0	0	0
ENSG00000143437.16	ENSG00000143437	ARNT	1	150782181	150849244	22	4865	67063	protein_coding	0.487087	26.8705	83.1671	0.0019	0.0054	0.351852	0.0421	0.3331	0.126388	0	0	0.22	10	0.00286903	ENSP00000351407	0	1	0	0	0	0
ENSG00000143379.8	ENSG00000143379	SETDB1	1	150898739	150937213	22	4415	38474	protein_coding	0.532209	16.0173	10.2674	0.0012	0.0061	0.196721	0.0385	0.3997	0.0963222	0	0	0.016	172	0.00183943	ENSP00000271640	0	1	0	0	0	0
ENSG00000143418.15	ENSG00000143418	CERS2	1	150933059	150947479	11	2494	14420	protein_coding	0.716816	158.882	1528.82	0	0.0028	0	0.0364	0.329	0.110638	0	0	NA	25	0.0251792	ENSP00000271688	0	0	0	0	0	0
ENSG00000143412.5	ENSG00000143412	ANXA9	1	150954493	150968110	14	1812	13617	protein_coding	0.830409	20.8228	155.232	0.0013	0.004	0.325	0.1392	0.6582	0.211486	3	0.014	0.026	1	0.0036905	ENSP00000357943	0	0	0	0	0	0
ENSG00000143409.11	ENSG00000143409	FAM63A	1	150969025	150980851	11	2806	11826	protein_coding	0.570124	23.729	231	0.007	0.0059	1.18644	0.093	0.5767	0.161262	0	0	0.043	12	0.0035629	ENSP00000354669	0	0	0	0	0	0
ENSG00000143363.11	ENSG00000143363	PRUNE	1	150980896	151008189	8	2989	27293	protein_coding	0.557878	19.5801	20.9992	NA	NA	NA	0.0894	0.4245	0.210601	0	0	0.023	9	0.002858	ENSP00000271620	0	0	0	0	0	0
ENSG00000163141.14	ENSG00000163141	BNIPL	1	151009046	151020076	10	2326	11030	protein_coding	0.921965	81.5108	965.431	0.0026	0.0068	0.382353	0.0807	0.5121	0.157586	0	0.041	0.329	NA	0.0132729	NA	0	0	0	0	0	0
ENSG00000143443.9	ENSG00000143443	C1orf56	1	151020216	151024462	2	2094	4246	protein_coding	0.966488	120.965	1230.98	0.0026	0	NA	0.2508	0.7279	0.344553	4	0	0	NA	0.0204828	NA	0	0	0	0	0	0
ENSG00000197622.8	ENSG00000197622	CDC42SE1	1	151023447	151042801	8	3490	19354	protein_coding	0.785128	162.829	6246.73	0	0.014	0	0.0116	0.4382	0.0264719	2	0	0.014	NA	0.0218636	NA	0	0	0	0	0	0
ENSG00000143458.7	ENSG00000143458	GABPB2	1	151043054	151098018	9	8955	54964	protein_coding	0.542908	7.02416	2.84585	0.0032	0.0076	0.421053	0.0866	0.3719	0.232858	0	0	0.028	12	0.000378618	ENSP00000357914	0	0	0	0	0	0
ENSG00000143434.11	ENSG00000143434	SEMA6C	1	151104161	151119104	19	5243	14943	protein_coding	0.860452	42.1987	586.084	0.0024	0.005	0.48	0.062	0.4739	0.130829	NA	0	0.28	7	0.00422598	ENSP00000357909	0	0	0	0	0	0
ENSG00000163156.7	ENSG00000163156	SCNM1	1	151129140	151142773	7	2009	13633	protein_coding	0.449657	17.0486	45.6559	0.0039	0.0061	0.639344	0.1056	0.402	0.262687	0	0	0.151	NA	0.00291882	NA	0	0	0	0	0	0
ENSG00000163155.7	ENSG00000163155	LYSMD1	1	151132224	151138424	3	2476	6200	protein_coding	0.52196	6.72574	4.87078	0.0047	0.004	1.175	0.0931	0.39	0.238718	0	0	0.78	NA	0.00106896	NA	0	0	0	0	0	0
ENSG00000163157.10	ENSG00000163157	TMOD4	1	151142462	151148760	10	1257	6298	protein_coding	0.996617	162.113	4696.78	0	0.0027	0	0.0174	0.4365	0.0398625	0	0	0	29	0.0315296	ENSP00000295314	0	0	0	0	0	0
ENSG00000163159.7	ENSG00000163159	VPS72	1	151142463	151167797	13	4254	25334	protein_coding	0.27525	25.0535	68.4497	0.0013	0.0204	0.0637255	0.0146	0.6504	0.0224477	0	0	0.014	40	0.0029641	ENSP00000357887	0	0	0	0	0	0
ENSG00000143398.15	ENSG00000143398	PIP5K1A	1	151170425	151222012	15	3752	51587	protein_coding	0.605775	32.333	27.3254	0.0009	0.0035	0.257143	0.0484	0.491	0.0985743	0	0.041	0.016	55	0.00414732	ENSP00000357883	0	0	0	0	0	0
ENSG00000159352.11	ENSG00000159352	PSMD4	1	151227179	151239955	10	1340	12776	protein_coding	0.480615	106.816	1495.23	0	0.0137	0	0.0172	0.4501	0.0382137	0	0	0.015	228	0.020539	ENSP00000357879	0	1	1	0	0	0
ENSG00000232671.2	ENSG00000232671	RP11-126K1.2	1	151252500	151254405	2	620	1905	protein_coding	0.80673	1.69352	0.480461	NA	NA	NA	NA	NA	NA	NA	0	NA	NA	0.000365771	NA	0	0	0	0	0	0
ENSG00000143373.13	ENSG00000143373	ZNF687	1	151254094	151264656	10	5368	10562	protein_coding	0.452686	11.3213	21.1289	0.0015	0.0085	0.176471	0.0886	0.4666	0.189884	0	0	0	325	0.00110826	ENSP00000319829	0	0	0	0	0	0
ENSG00000143393.12	ENSG00000143393	PI4KB	1	151264273	151300191	13	3970	35918	protein_coding	0.368572	31.064	45.2625	0.0041	0.0075	0.546667	0.0071	0.3098	0.022918	0	0	0	86	0.00385072	ENSP00000271657	0	0	0	0	0	0
ENSG00000143390.13	ENSG00000143390	RFX5	1	151313116	151319833	11	3565	6717	protein_coding	0.76169	39.7975	45.2213	0.0023	0.0073	0.315068	0.1439	0.484	0.297314	0	0	0.089	NA	0.00527213	NA	1	0	0	0	0	0
ENSG00000143416.16	ENSG00000143416	SELENBP1	1	151336778	151345209	8	2832	8431	protein_coding	0.913773	542.17	183277	0.0051	0.0182	0.28022	0.0671	0.5456	0.122984	0	0	0.016	2	0.0811283	ENSP00000357861	0	0	0	0	0	0
ENSG00000159377.6	ENSG00000159377	PSMB4	1	151372010	151374420	2	2065	2410	protein_coding	0.397651	215.736	2169.11	0.0017	0.005	0.34	0.0347	0.4951	0.0700869	0	0.018	0	354	0.0367416	ENSP00000290541	0	0	1	0	0	0
ENSG00000143442.17	ENSG00000143442	POGZ	1	151375200	151431941	19	6607	56741	protein_coding	0.541567	42.459	162.804	0	0.002	0	0.033	0.3662	0.0901147	0	0.01	0.179	724	0.00339039	ENSP00000271715	0	0	0	0	0	0
ENSG00000143375.10	ENSG00000143375	CGN	1	151482986	151511168	21	5070	28182	protein_coding	0.81624	35.0942	708.605	0.0043	0.007	0.614286	0.0724	0.6166	0.117418	0	0.007	0	1	0.00361783	ENSP00000271636	0	0	0	0	0	0
ENSG00000143367.11	ENSG00000143367	TUFT1	1	151512781	151556059	13	3098	43278	protein_coding	0.900971	81.3937	1176.8	0.0357	0.0569	0.627417	0.0531	0.4026	0.131893	0	0	0.082	NA	0.0116557	NA	0	0	0	0	0	0
ENSG00000143376.8	ENSG00000143376	SNX27	1	151584541	151671567	12	7185	87026	protein_coding	0.41608	13.0208	45.0285	0	0.0035	0	0.0098	0.2681	0.0365535	0	0	0.004	NA	0.000941796	NA	0	1	0	0	0	0
ENSG00000159409.10	ENSG00000159409	CELF3	1	151674880	151689290	13	3233	14410	protein_coding	0.985893	80.6663	518.96	0.001	0.025	0.04	0.001	0.28	0.00357143	0	0.004	0.015	7	0.0112983	ENSP00000290583	0	0	0	0	0	0
ENSG00000178796.8	ENSG00000178796	RIIAD1	1	151682909	151702281	9	1763	19372	protein_coding	0.942538	1.23327	0.603308	0.0177	0	NA	0.1528	0.8685	0.175936	4	0.005	NA	NA	0.000220026	NA	0	0	0	0	0	0
ENSG00000143436.6	ENSG00000143436	MRPL9	1	151732119	151736040	7	1289	3921	protein_coding	0.416289	41.5528	56.0916	0.0017	0.0091	0.186813	0.116	0.4922	0.235677	0	0	0	161	0.00805342	ENSP00000357823	0	0	0	0	0	0
ENSG00000143450.10	ENSG00000143450	OAZ3	1	151735445	151743808	4	3786	8363	protein_coding	0.993778	60.4427	349.137	0.0677	0.0987	0.685917	0.1687	0.6222	0.271135	2	0.018	0.014	2	0.00771152	ENSP00000415904	0	0	0	0	0	0
ENSG00000182134.11	ENSG00000182134	TDRKH	1	151742583	151763892	14	3079	21309	protein_coding	0.904835	17.0107	9.07932	0.0033	0.0068	0.485294	0.059	0.333	0.177177	0	0	0.273	NA	0.00244196	NA	0	0	0	0	0	0
ENSG00000213171.2	ENSG00000213171	LINGO4	1	151772740	151778630	2	3377	5890	protein_coding	0.975601	9.19456	24.7858	0.0017	0.0147	0.115646	0.0304	0.4178	0.0727621	1	0.034	0.375	6	0.00125612	ENSP00000357810	0	0	0	0	0	0
ENSG00000143365.12	ENSG00000143365	RORC	1	151778547	151804348	2	4139	25801	protein_coding	0.843967	14.3446	53.8815	0.0185	0.0384	0.481771	0.0554	0.492	0.112602	0	0.02	0	12	0.0017214	ENSP00000327025	0	0	1	1	0	0
ENSG00000225556.1	ENSG00000225556	C2CD4D	1	151810295	151813033	2	1755	2738	protein_coding	0.868126	2.07512	1.47006	0.0024	0.0137	0.175182	0.1269	1.1066	0.114676	NA	0	0.002	NA	0.000372573	NA	0	0	0	0	0	0
ENSG00000196407.7	ENSG00000196407	THEM5	1	151819739	151826173	6	978	6434	protein_coding	0.972516	101.889	2108.89	0.0386	0.0238	1.62185	0.1222	0.455	0.268571	3	0	0	NA	0.0207971	NA	0	0	0	0	0	0
ENSG00000159445.8	ENSG00000159445	THEM4	1	151846060	151882284	5	2401	36224	protein_coding	0.499358	9.90265	5.84836	0.0127	0.013	0.976923	0.2039	0.4225	0.482604	5	0.014	0.359	NA	0.00159226	NA	0	0	0	0	0	0
ENSG00000197747.4	ENSG00000197747	S100A10	1	151955391	151966866	3	1199	11475	protein_coding	0.778362	447.102	16783	0	0.0101	0	0.0382	0.4569	0.0836069	1	0	0.023	19	0.0878437	ENSP00000357799	0	0	0	0	0	0
ENSG00000163191.5	ENSG00000163191	S100A11	1	152004982	152020383	3	591	15401	protein_coding	0.859307	2079.88	2.43023e+06	0	0.0296	0	0.1033	0.7738	0.133497	2	0	0.032	14	0.452362	ENSP00000271638	0	0	0	0	0	0
ENSG00000182898.3	ENSG00000182898	TCHHL1	1	152056620	152061540	3	3600	4920	protein_coding	0.988562	0.439589	5.18588	0.0078	0.0092	0.847826	0.524	0.5889	0.889795	4	NA	NA	NA	5.79e-05	NA	0	0	0	0	0	0
ENSG00000159450.8	ENSG00000159450	TCHH	1	152078793	152086556	2	6898	7763	protein_coding	0.983215	24.6458	7288.49	NA	NA	NA	2.7642	5.4608	0.50619	0	0	NA	1	0.00186951	ENSP00000357794	0	0	0	0	0	0
ENSG00000215853.3	ENSG00000215853	RPTN	1	152126071	152131704	3	3566	5633	protein_coding	0.957707	9.38143	2214.9	0.0527	0.0348	1.51437	0.7273	0.9552	0.761411	0	0.047	NA	165	0.00124232	ENSP00000317895	0	0	0	0	0	0
ENSG00000197915.5	ENSG00000197915	HRNR	1	152184558	152196669	3	9620	12111	protein_coding	0.690669	0.365631	0.0498527	0.0711	0.0863	0.82387	1.1501	3.4283	0.335472	4	0	NA	NA	1.77e-05	NA	0	0	0	0	0	0
ENSG00000143631.10	ENSG00000143631	FLG	1	152274651	152297679	3	12744	23028	protein_coding	0.983223	234.907	15244.9	0.3332	0.3091	1.07797	NA	NA	NA	11	0	NA	1	0.00673918	ENSP00000357789	0	1	0	0	0	0
ENSG00000143520.6	ENSG00000143520	FLG2	1	152321211	152332482	3	9121	11271	protein_coding	0.981537	343.651	37926.2	0.2209	0.2739	0.806499	1.2783	2.0353	0.628065	NA	0.031	NA	NA	0.018047	NA	0	0	0	0	0	0
ENSG00000143536.7	ENSG00000143536	CRNN	1	152381719	152386739	3	1899	5020	protein_coding	0.979695	3240.88	3.85318e+06	0.023	0.0382	0.602094	0.5049	0.9421	0.53593	4	0	NA	8	0.566588	ENSP00000271835	0	0	0	0	0	0
ENSG00000186207.4	ENSG00000186207	LCE5A	1	152483320	152484653	2	817	1333	protein_coding	0.982872	57.3687	1903.98	NA	NA	NA	NA	NA	NA	5	0	NA	NA	0.0120219	NA	0	0	0	0	0	0
ENSG00000169509.5	ENSG00000169509	CRCT1	1	152486978	152488486	2	698	1508	protein_coding	0.95886	822.275	620220	NA	NA	NA	NA	NA	NA	3	0	NA	NA	0.175609	NA	0	0	0	0	0	0
ENSG00000185966.3	ENSG00000185966	LCE3E	1	152538130	152539248	2	609	1118	protein_coding	0.980644	68.5573	21498.1	0.0158	0.0265	0.596226	NA	NA	NA	4	0	NA	NA	0.0148745	NA	0	0	0	0	0	0
ENSG00000163202.4	ENSG00000163202	LCE3D	1	152551857	152552980	2	611	1123	protein_coding	0.972069	194.492	128666	0.0107	0.0539	0.198516	NA	NA	NA	4	0	NA	NA	0.042051	NA	0	0	0	0	0	0
ENSG00000244057.2	ENSG00000244057	LCE3C	1	152573138	152573562	1	424	424	protein_coding	0.938591	0.411117	11.1742	0.0253	0.0137	1.84672	NA	NA	NA	NA	NA	NA	NA	9.19e-05	NA	0	0	0	0	0	0
ENSG00000187238.5	ENSG00000187238	LCE3B	1	152586287	152586574	1	287	287	protein_coding	0.96462	0.0356858	0.00764086	0.0192	0.0303	0.633663	NA	NA	NA	4	NA	NA	NA	8.17e-06	NA	0	0	0	0	0	0
ENSG00000185962.1	ENSG00000185962	LCE3A	1	152595310	152595579	1	269	269	protein_coding	0.967602	6.59791	261.194	0.0204	0.0314	0.649682	NA	NA	NA	5	NA	NA	NA	0.00151454	NA	0	0	0	0	0	0
ENSG00000187223.3	ENSG00000187223	LCE2D	1	152635872	152637135	2	607	1263	protein_coding	0.985469	81.7529	5312.02	0.0194	0.0085	2.28235	NA	NA	NA	7	0	NA	NA	0.0177426	NA	0	0	0	0	0	0
ENSG00000159455.7	ENSG00000159455	LCE2B	1	152647771	152659877	2	610	12106	protein_coding	0.986049	388.849	68535.2	0.0253	0.0356	0.710674	NA	NA	NA	4	0.018	NA	NA	0.0843328	NA	0	0	0	0	0	0
ENSG00000187180.3	ENSG00000187180	LCE2C	1	152647771	152649050	2	612	1279	protein_coding	0.986105	187.586	19713	0.0267	0.0646	0.413313	NA	NA	NA	4	0.041	NA	NA	0.0407437	NA	0	0	0	0	0	0
ENSG00000187173.3	ENSG00000187173	LCE2A	1	152670840	152671918	2	590	1078	protein_coding	0.98791	64.8455	2431.37	0.005	0.0111	0.45045	NA	NA	NA	3	0	NA	NA	0.0140952	NA	0	0	0	0	0	0
ENSG00000187170.4	ENSG00000187170	LCE4A	1	152680636	152681967	2	670	1331	protein_coding	0.984447	0.892857	0.42288	NA	NA	NA	NA	NA	NA	3	NA	NA	NA	0.00019167	NA	0	0	0	0	0	0
ENSG00000198854.4	ENSG00000198854	C1orf68	1	152691998	152692905	1	907	907	protein_coding	0.984226	366.468	48530.5	0.0094	0.0049	1.91837	0.1297	0.576	0.225174	3	0	NA	NA	0.0755136	NA	0	0	0	0	0	0
ENSG00000203786.5	ENSG00000203786	KPRP	1	152730506	152734529	2	2521	4023	protein_coding	0.983407	244.492	20507.4	0.0061	0.009	0.677778	0.2689	0.6688	0.402063	3	0	NA	3	0.0384662	ENSP00000357762	0	0	0	0	0	0
ENSG00000240386.2	ENSG00000240386	LCE1F	1	152748848	152749445	1	597	597	protein_coding	0.986405	90.4911	5579.06	NA	NA	NA	NA	NA	NA	NA	0	NA	NA	0.0196624	NA	0	0	0	0	0	0
ENSG00000186226.7	ENSG00000186226	LCE1E	1	152758690	152760902	2	1178	2212	protein_coding	0.986949	30.6529	847.285	NA	NA	NA	NA	NA	NA	3	0	NA	NA	0.00605427	NA	0	0	0	0	0	0
ENSG00000172155.7	ENSG00000172155	LCE1D	1	152769227	152770657	2	428	1430	protein_coding	0.987486	42.7406	1880	NA	NA	NA	NA	NA	NA	4	0.066	NA	NA	0.00954227	NA	0	0	0	0	0	0
ENSG00000197084.4	ENSG00000197084	LCE1C	1	152777311	152779107	2	693	1796	protein_coding	0.984764	299.502	49022.5	0.0035	0.0869	0.0402762	NA	NA	NA	6	0	NA	NA	0.0641444	NA	0	0	0	0	0	0
ENSG00000196734.6	ENSG00000196734	LCE1B	1	152784447	152785585	1	1138	1138	protein_coding	0.985035	123.719	8456.38	NA	NA	NA	NA	NA	NA	4	0.01	NA	NA	0.0246173	NA	0	0	0	0	0	0
ENSG00000186844.4	ENSG00000186844	LCE1A	1	152799949	152800573	1	624	624	protein_coding	0.986594	223.171	25269.1	NA	NA	NA	NA	NA	NA	4	0	NA	NA	0.0482323	NA	0	0	0	0	0	0
ENSG00000235942.2	ENSG00000235942	LCE6A	1	152815344	152816459	2	626	1115	protein_coding	0.986419	83.3163	3396.69	0.021	0	NA	NA	NA	NA	NA	0	NA	NA	0.0180108	NA	0	0	0	0	0	0
ENSG00000163206.5	ENSG00000163206	SMCP	1	152850793	152857523	2	773	6730	protein_coding	0.999889	744.004	57676	0.0177	0.0352	0.502841	NA	NA	NA	5	0	NA	NA	0.156971	NA	0	0	0	0	0	0
ENSG00000163207.5	ENSG00000163207	IVL	1	152881021	152884362	2	2151	3341	protein_coding	0.912799	212.245	106567	0.0356	0.0333	1.06907	4.6835	7.3525	0.636994	NA	0	NA	NA	0.0355479	NA	0	0	0	0	0	0
ENSG00000184148.3	ENSG00000184148	SPRR4	1	152943142	152945050	2	731	1908	protein_coding	0.982695	82.1606	32741.7	0.0156	0.0215	0.725581	0.2952	1.0828	0.272627	4	0.008	NA	NA	0.0174646	NA	0	0	0	0	0	0
ENSG00000169474.3	ENSG00000169474	SPRR1A	1	152956557	152958289	2	645	1732	protein_coding	0.963347	2714	5.53753e+06	0	0	NA	0.1676	0.7592	0.220759	4	0	NA	6	0.584093	ENSP00000307340	0	0	0	0	0	0
ENSG00000163209.10	ENSG00000163209	SPRR3	1	152974223	152976332	3	982	2109	protein_coding	0.973617	8498.33	3.86415e+07	0.0383	0.0118	3.24576	0.3089	0.5556	0.555976	4	0	NA	6	1.73194	ENSP00000295367	0	0	0	0	0	0
ENSG00000169469.7	ENSG00000169469	SPRR1B	1	153003678	153005376	2	618	1698	protein_coding	0.936798	1317.83	4.44855e+06	0.0084	0.0253	0.332016	0.0978	0.453	0.215894	3	0	NA	7	0.285786	ENSP00000306461	0	0	0	0	0	0
ENSG00000163216.6	ENSG00000163216	SPRR2D	1	153012201	153014407	2	798	2206	protein_coding	0.975314	622.398	533830	0	0	NA	NA	NA	NA	3	0	NA	NA	0.130685	NA	0	0	0	0	0	0
ENSG00000241794.1	ENSG00000241794	SPRR2A	1	153028589	153030013	2	707	1424	protein_coding	0.980029	2802.63	5.40057e+06	0	0	NA	NA	NA	NA	NA	0	NA	NA	0.597286	NA	0	0	0	0	0	0
ENSG00000196805.6	ENSG00000196805	SPRR2B	1	153042700	153113927	2	660	71227	protein_coding	0.956907	36.0714	3578.28	0	0	NA	NA	NA	NA	NA	0.043	NA	NA	0.00776129	NA	0	0	0	0	0	0
ENSG00000203785.4	ENSG00000203785	SPRR2E	1	153065611	153078660	2	690	13049	protein_coding	0.95388	869.537	1.46339e+06	0	0.0223	0	NA	NA	NA	3	0	NA	NA	0.186112	NA	0	0	0	0	0	0
ENSG00000244094.1	ENSG00000244094	SPRR2F	1	153084590	153085991	2	679	1401	protein_coding	0.979778	164.364	155462	NA	NA	NA	NA	NA	NA	NA	0	NA	NA	0.0351476	NA	0	0	0	0	0	0
ENSG00000159516.8	ENSG00000159516	SPRR2G	1	153122058	153123345	2	566	1287	protein_coding	0.990459	497.857	577938	0.0103	0.0088	1.17045	NA	NA	NA	NA	0	NA	NA	0.108758	NA	0	0	0	0	0	0
ENSG00000203784.2	ENSG00000203784	LELP1	1	153175919	153177596	2	521	1677	protein_coding	0.999896	927.605	130744	0.0278	0.0092	3.02174	0.2806	1.5351	0.182789	4	0	NA	NA	0.204192	NA	0	0	0	0	0	0
ENSG00000203783.4	ENSG00000203783	PRR9	1	153190060	153191793	2	1227	1733	protein_coding	0.983539	32.5637	10634.7	0.0152	0.0389	0.390746	0.1237	0.5303	0.233264	3	0.003	NA	NA	0.00637666	NA	0	0	0	0	0	0
ENSG00000203782.5	ENSG00000203782	LOR	1	153232176	153234598	2	1228	2422	protein_coding	0.981432	985.144	373059	NA	NA	NA	NA	NA	NA	4	0	NA	NA	0.192637	NA	1	0	0	0	0	0
ENSG00000159527.3	ENSG00000159527	PGLYRP3	1	153270338	153283194	7	1166	12856	protein_coding	0.923221	28.6309	508.046	0.0015	0.0168	0.0892857	0.1674	0.635	0.263622	2	0	NA	1	0.00565143	ENSP00000290722	0	0	1	0	0	0
ENSG00000163218.10	ENSG00000163218	PGLYRP4	1	153302596	153321316	9	2107	18720	protein_coding	0.92194	10.2941	181.337	0.0063	0.0204	0.308824	0.161	0.6323	0.254626	4	0	NA	1	0.00173981	ENSP00000352672	0	0	1	0	0	0
ENSG00000163220.10	ENSG00000163220	S100A9	1	153330330	153333503	3	574	3173	protein_coding	0.949868	18392.7	2.80803e+08	0.0041	0.0535	0.0766355	0.3601	1.0186	0.353524	5	0.027	0.161	23	4.01302	ENSP00000357727	0	0	1	0	0	0
ENSG00000163221.7	ENSG00000163221	S100A12	1	153346184	153348125	3	513	1941	protein_coding	0.990887	1595.54	4.03483e+06	0.013	0.0089	1.46067	0.8015	58.1663	0.0137795	5	0	0.577	13	0.352525	ENSP00000357726	0	0	1	0	0	0
ENSG00000143546.5	ENSG00000143546	S100A8	1	153362508	153363664	2	715	1156	protein_coding	0.956646	5898.28	1.10997e+07	0	0.0433	0	0.3387	0.7952	0.425931	5	0	0.048	19	1.25689	ENSP00000357721	0	1	1	0	0	0
ENSG00000184330.7	ENSG00000184330	S100A7A	1	153389000	153395701	3	4276	6701	protein_coding	0.98404	3.82884	172.962	0.0222	0.029	0.765517	0.7099	78.897	0.00899781	5	0	NA	2	0.000450636	ENSP00000329008	0	0	0	0	0	0
ENSG00000197364.6	ENSG00000197364	S100A7L2	1	153409534	153412425	3	336	2891	protein_coding	0.978085	0.026388	0.00295511	0.0044	0	NA	NA	NA	NA	9	NA	NA	NA	5.99e-06	NA	0	0	0	0	0	0
ENSG00000143556.4	ENSG00000143556	S100A7	1	153430220	153433177	3	476	2957	protein_coding	0.959491	444.154	906507	0.0199	0.0557	0.357271	NA	NA	NA	10	0.005	NA	2	0.0984309	ENSP00000357711	0	0	1	0	0	0
ENSG00000197956.5	ENSG00000197956	S100A6	1	153507075	153508720	3	670	1645	protein_coding	0.613798	1231.83	271350	0	0.0156	0	0.0148	0.3305	0.0447806	3	0	0.005	22	0.264002	ENSP00000357708	0	0	0	0	0	0
ENSG00000196420.3	ENSG00000196420	S100A5	1	153509623	153514241	4	706	4618	protein_coding	0.904833	2.03631	1.66687	0.0045	0.0171	0.263158	0.0217	0.7052	0.0307714	4	0	0.005	NA	0.000435238	NA	0	0	0	0	0	0
ENSG00000196154.7	ENSG00000196154	S100A4	1	153516089	153522612	2	753	6523	protein_coding	0.82891	632.358	222482	0	0.0126	0	0.0312	0.7511	0.0415391	3	0.087	0	23	0.133786	ENSP00000346294	0	1	0	0	0	0
ENSG00000188015.5	ENSG00000188015	S100A3	1	153519805	153521848	3	853	2043	protein_coding	0.933612	42.5395	14907	0	0.0289	0	0.0429	0.4658	0.0920996	3	0	0	NA	0.00884795	NA	0	0	0	0	0	0
ENSG00000196754.6	ENSG00000196754	S100A2	1	153533584	153540366	3	995	6782	protein_coding	0.976253	612.113	95922.3	0.0048	0.0417	0.115108	NA	NA	NA	3	0	0	2	0.12443	ENSP00000357697	0	0	0	0	0	0
ENSG00000188643.6	ENSG00000188643	S100A16	1	153579362	153585621	3	1143	6259	protein_coding	0.929865	893.343	78346.1	0.0042	0	NA	0.0677	0.9776	0.0692512	4	0	NA	NA	0.177137	NA	0	0	0	0	0	0
ENSG00000189334.4	ENSG00000189334	S100A14	1	153586731	153589462	5	1213	2731	protein_coding	0.964982	1647.18	439028	0.0045	0.0121	0.371901	0.0535	0.6493	0.0823964	4	0	NA	1	0.323499	ENSP00000340463	0	0	1	0	0	0
ENSG00000189171.9	ENSG00000189171	S100A13	1	153591263	153606568	5	2179	15305	protein_coding	0.700176	98.9259	908.944	0	0.0122	0	0.0906	0.9634	0.0940419	0	0.017	0.567	1	0.0165062	ENSP00000344822	0	0	1	0	0	0
ENSG00000160679.8	ENSG00000160679	CHTOP	1	153606525	153618782	3	2550	12257	protein_coding	0.354399	24.0879	45.6288	0	0.0074	0	0.0047	0.0907	0.0518192	0	0	NA	5	0.003781	ENSP00000357683	0	0	0	0	0	0
ENSG00000143553.6	ENSG00000143553	SNAPIN	1	153631130	153634306	2	1203	3176	protein_coding	0.399647	28.1646	25.0744	0	0.0178	0	0.0109	0.4182	0.0260641	4	0	0.128	1	0.00553812	ENSP00000357674	0	1	0	0	0	0
ENSG00000143621.12	ENSG00000143621	ILF2	1	153634512	153643524	14	1645	9012	protein_coding	0.563633	108.468	518.237	0	0.0038	0	0	0.3772	0	0	0	0.018	160	0.0197032	ENSP00000355011	0	1	1	0	0	0
ENSG00000169418.9	ENSG00000169418	NPR1	1	153651113	153666468	22	4214	15355	protein_coding	0.8724	100.126	1076.98	0.0049	0.025	0.196	0.0449	0.6201	0.0724077	0	0	NA	844	0.0118882	ENSP00000357669	0	0	0	0	0	0
ENSG00000143624.9	ENSG00000143624	INTS3	1	153700543	153746555	29	5712	46012	protein_coding	0.490966	62.0931	536.072	0	0.0071	0	0.0059	0.3967	0.0148727	0	0	0	27	0.0057511	ENSP00000318641	0	0	0	0	0	0
ENSG00000143554.9	ENSG00000143554	SLC27A3	1	153746830	153752633	2	4502	5803	protein_coding	0.53684	24.6364	157.737	0.0046	0.0187	0.245989	0.0774	0.6345	0.121986	2	0	0.129	13	0.0027874	ENSP00000357650	0	0	0	0	0	0
ENSG00000143614.7	ENSG00000143614	GATAD2B	1	153777201	153895451	11	7467	118250	protein_coding	0.317194	10.8026	37.2863	0.0009	0.0093	0.0967742	0.0064	0.2787	0.0229638	0	0	0	2	0.000746484	ENSP00000357644	0	0	0	0	0	0
ENSG00000198837.5	ENSG00000198837	DENND4B	1	153901977	153919172	28	5678	17195	protein_coding	0.690269	49.8887	145.683	0.0016	0.0088	0.181818	0.0313	0.4351	0.0719375	0	0	0.042	NA	0.00464752	NA	0	0	0	0	0	0
ENSG00000160741.12	ENSG00000160741	CRTC2	1	153920145	153931101	14	2630	10956	protein_coding	0.50278	45.5641	293.127	0.031	0.0106	2.92453	0.0422	0.2789	0.151309	4	0.097	0	2	0.00705932	ENSP00000357622	0	0	0	0	0	0
ENSG00000143570.13	ENSG00000143570	SLC39A1	1	153931575	153940188	3	2720	8613	protein_coding	0.422087	53.1634	274.61	0.0015	0.0104	0.144231	0.0329	0.559	0.0588551	0	0	0.06	57	0.00811322	ENSP00000309710	0	0	0	0	0	0
ENSG00000143578.11	ENSG00000143578	CREB3L4	1	153940010	153946839	10	1742	6829	protein_coding	0.881327	38.4816	783.853	0.0037	0.0027	1.37037	0.179	0.4401	0.406726	0	0	0.101	2	0.00691115	ENSP00000271889	0	0	0	0	0	0
ENSG00000143543.10	ENSG00000143543	JTB	1	153946745	153950164	5	1282	3419	protein_coding	0.501977	151.235	984.218	0	0.0197	0	0.0825	0.5847	0.141098	2	0	0	1	0.0292665	ENSP00000271843	0	0	0	0	0	0
ENSG00000143545.4	ENSG00000143545	RAB13	1	153954127	153958834	3	2120	4707	protein_coding	0.536115	63.1327	504.228	0	0.0193	0	0.0384	0.4105	0.0935445	0	0	0	10	0.0106353	ENSP00000357564	0	0	0	0	0	0
ENSG00000177954.7	ENSG00000177954	RPS27	1	153963235	153964626	2	623	1391	protein_coding	0.645008	416.389	27572.4	0	0	NA	0	0.1478	0	0	0	0	325	0.089991	ENSP00000357555	0	0	0	0	0	0
ENSG00000143552.5	ENSG00000143552	NUP210L	1	153965161	154127592	40	5849	162431	protein_coding	0.995471	13.9342	16.015	0.0033	0.0053	0.622642	0.1114	0.5235	0.212798	2	0	0.06	105	0.00125822	ENSP00000357547	0	0	0	0	0	0
ENSG00000143549.15	ENSG00000143549	TPM3	1	154127784	154167124	5	4036	39340	protein_coding	0.927714	384.7	56725	0	0.0027	0	0.0968	0.6317	0.153237	1	0	0.089	257	0.047148	ENSP00000357516	1	1	0	0	0	0
ENSG00000163263.6	ENSG00000163263	C1orf189	1	154171848	154178809	4	383	6961	protein_coding	0.991445	20.2535	68.4669	0.0057	0	NA	0.1468	0.3882	0.378156	4	0	0.01	NA	0.00457065	NA	0	0	0	0	0	0
ENSG00000143612.14	ENSG00000143612	C1orf43	1	154179182	154193104	7	1701	13922	protein_coding	0.451592	92.1688	355.782	0.0042	0.0037	1.13514	0.0211	0.4123	0.0511763	0	0	0.01	NA	0.0166644	NA	0	0	0	0	0	0
ENSG00000143569.14	ENSG00000143569	UBAP2L	1	154192655	154243986	27	3961	51331	protein_coding	0.403682	30.4914	32.6241	0.0005	0.0048	0.104167	0.0092	0.1905	0.048294	0	0	0.008	14	0.0037821	ENSP00000355343	0	0	0	0	0	0
ENSG00000143575.10	ENSG00000143575	HAX1	1	154244987	154248351	6	1278	3364	protein_coding	0.482605	85.6298	320.521	0.0019	0.0069	0.275362	0.1032	0.4161	0.248017	3	0	0.17	5	0.0166019	ENSP00000329002	1	0	0	0	0	0
ENSG00000143595.8	ENSG00000143595	AQP10	1	154293566	154297801	5	2257	4235	protein_coding	0.956821	1.78883	4.71214	0.0017	0.0035	0.485714	NA	NA	NA	0	0	0.068	150	0.000294887	ENSP00000318355	0	0	0	0	0	0
ENSG00000143515.12	ENSG00000143515	ATP8B2	1	154298029	154323783	28	5833	25754	protein_coding	0.552365	27.2635	125.109	0.0007	0.0143	0.048951	0.0131	0.5229	0.0250526	0	0	0.105	120	0.00247777	ENSP00000357475	0	0	0	0	0	0
ENSG00000160712.8	ENSG00000160712	IL6R	1	154377669	154441926	10	5904	64257	protein_coding	0.81626	41.0497	1101.12	0.002	0.019	0.105263	0.3304	0.8449	0.391052	2	0.005	0	NA	0.00367741	NA	0	0	1	0	0	0
ENSG00000169291.5	ENSG00000169291	SHE	1	154442248	154474589	3	6852	32341	protein_coding	0.732606	12.107	9.75933	0.0021	0.0101	0.207921	0.0847	0.681	0.124376	0	0	0.139	NA	0.000926634	NA	0	0	0	0	0	0
ENSG00000163239.8	ENSG00000163239	TDRD10	1	154474695	154520623	13	2318	45928	protein_coding	0.954391	60.8183	209.772	0.0062	0.0088	0.704545	NA	NA	NA	2	0	NA	NA	0.00991495	NA	0	0	0	0	0	0
ENSG00000160714.5	ENSG00000160714	UBE2Q1	1	154521053	154531504	13	3197	10451	protein_coding	0.54604	38.2942	31.6369	0	0.0047	0	0.0033	0.2063	0.0159961	4	0	0.027	17	0.00539443	ENSP00000292211	0	0	0	0	0	0
ENSG00000160716.4	ENSG00000160716	CHRNB2	1	154540257	154552502	6	5861	12245	protein_coding	0.981594	10.5137	29.3602	0	0.0147	0	0.0285	0.8472	0.0336402	1	0	0.123	1	0.000948552	ENSP00000357461	1	0	0	0	0	0
ENSG00000160710.11	ENSG00000160710	ADAR	1	154554538	154600475	15	6605	45937	protein_coding	0.713967	120.086	827.662	0.0047	0.0123	0.382114	0.1254	0.5551	0.225905	0	0.039	0.066	73	0.00957606	ENSP00000357459	1	1	1	0	0	0
ENSG00000268141.1	ENSG00000268141	AL606500.1	1	154585067	154585190	2	19	123	protein_coding	NA	0	0	NA	NA	NA	NA	NA	NA	NA	NA	NA	NA	0	NA	0	0	0	0	0	0
ENSG00000143603.14	ENSG00000143603	KCNN3	1	154669931	154842756	8	13025	172825	protein_coding	0.871369	8.06602	17.2937	0.0006	0.0117	0.0512821	0.0173	0.3978	0.0434892	0	NA	NA	9	0.000220835	ENSP00000271915	0	0	0	0	0	0
ENSG00000163344.5	ENSG00000163344	PMVK	1	154897210	154909467	5	1275	12257	protein_coding	0.50138	53.9222	293.808	0.0026	0.0408	0.0637255	0.0907	0.4165	0.217767	3	0	0.041	28	0.010459	ENSP00000357452	0	0	0	0	0	0
ENSG00000163346.12	ENSG00000163346	PBXIP1	1	154916552	154928599	11	3201	12047	protein_coding	0.638923	131.652	1397.59	0.0058	0.0079	0.734177	0.2183	0.7319	0.298265	NA	0	0.045	NA	0.0185794	NA	0	0	0	0	0	0
ENSG00000163348.3	ENSG00000163348	PYGO2	1	154929502	154936329	3	3143	6827	protein_coding	0.491314	29.5121	51.2702	0.0013	0.0045	0.288889	0.0169	0.5092	0.0331893	0	0	0	2	0.00419255	ENSP00000357442	0	1	0	0	0	0
ENSG00000160691.14	ENSG00000160691	SHC1	1	154934774	154946871	12	3469	12097	protein_coding	0.722073	122.615	1553.52	0.0017	0.0114	0.149123	0.024	0.4022	0.0596718	0	0	0.221	8	0.0165561	ENSP00000401303	0	1	1	0	0	0
ENSG00000173207.8	ENSG00000173207	CKS1B	1	154947129	154951725	2	1164	4596	protein_coding	0.800353	17.1524	14.9	0	0	NA	0	0.3346	0	0	0	0.004	228	0.0033999	ENSP00000311083	0	0	0	0	0	0
ENSG00000160688.14	ENSG00000160688	FLAD1	1	154955814	154965587	4	2652	9773	protein_coding	0.354015	10.5226	8.30662	0.0033	0.0118	0.279661	0.0566	0.5151	0.109882	0	0.044	0	77	0.00161955	ENSP00000292180	0	0	0	0	0	0
ENSG00000163352.5	ENSG00000163352	LENEP	1	154966062	154966791	2	647	729	protein_coding	0.729382	0.261916	0.0337904	0	0	NA	0.1241	0.511	0.242857	4	NA	NA	NA	5.65e-05	NA	0	0	0	0	0	0
ENSG00000160685.9	ENSG00000160685	ZBTB7B	1	154975127	154990998	4	3590	15871	protein_coding	0.693605	45.1292	630.584	0	0.0104	0	0.042	0.497	0.084507	0	0	0.008	325	0.00594936	ENSP00000292176	0	0	0	0	0	0
ENSG00000163354.10	ENSG00000163354	DCST2	1	154990996	155006257	16	2478	15261	protein_coding	0.880787	13.5771	22.3631	0.0025	0.0175	0.142857	NA	NA	NA	2	0.081	0.01	11	0.00215944	ENSP00000357409	0	0	0	0	0	0
ENSG00000163357.6	ENSG00000163357	DCST1	1	155006300	155023406	17	2262	17106	protein_coding	0.96142	7.10149	7.50952	0.0057	0.0207	0.275362	0.1784	0.7703	0.231598	NA	0.009	0.019	14	0.00116869	ENSP00000295542	0	0	0	0	0	0
ENSG00000143537.9	ENSG00000143537	ADAM15	1	155023042	155035252	22	4486	12210	protein_coding	0.630776	78.0957	367.194	0.0057	0.0125	0.456	0.1167	0.4757	0.245323	4	0	0.744	3	0.00887306	ENSP00000349436	0	0	1	0	0	0
ENSG00000243364.3	ENSG00000243364	EFNA4	1	155036207	155042029	4	1259	5822	protein_coding	0.764857	22.3059	33.2145	0.1102	0.2348	0.469336	0.2097	0.6609	0.317295	NA	0	0	121	0.00433874	ENSP00000414378	0	0	0	0	0	0
ENSG00000143590.9	ENSG00000143590	EFNA3	1	155036224	155060014	5	1032	23790	protein_coding	0.941974	11.3778	28.51	0	0.0101	0	0.0141	0.3252	0.0433579	4	0	0.052	124	0.00230356	ENSP00000357393	0	0	0	0	0	0
ENSG00000169242.7	ENSG00000169242	EFNA1	1	155099936	155107333	5	1921	7397	protein_coding	0.849643	148.223	13161.8	0	0.0103	0	0.0844	0.4695	0.179766	0	0	0	129	0.0257865	ENSP00000357392	0	0	0	0	0	0
ENSG00000169241.13	ENSG00000169241	SLC50A1	1	155107820	155111329	6	1294	3509	protein_coding	0.504573	28.7007	262.893	0	0	NA	0.1083	0.6352	0.170497	3	0	0.009	3	0.00555146	ENSP00000357389	0	0	0	0	0	0
ENSG00000179085.7	ENSG00000179085	DPM3	1	155112367	155113071	1	516	704	protein_coding	0.531392	49.7844	99.2484	0	0.0136	0	0.0551	0.6436	0.0856122	0	0.024	0	18	0.0109669	ENSP00000357384	1	0	0	0	0	0
ENSG00000163462.13	ENSG00000163462	TRIM46	1	155145873	155157447	12	3306	11574	protein_coding	0.843745	5.87259	8.6891	0	0.0099	0	0.0102	0.4807	0.0212191	0	0	0.023	NA	0.000811883	NA	0	0	0	0	0	0
ENSG00000185499.12	ENSG00000185499	MUC1	1	155158300	155162707	8	1803	4407	protein_coding	0.930886	490.855	121541	0.0112	0.017	0.658824	0.4011	0.7088	0.565886	2	0	0.085	2	0.0872478	ENSP00000357380	0	0	0	0	0	0
ENSG00000169231.9	ENSG00000169231	THBS3	1	155165379	155178842	23	3122	13463	protein_coding	0.566439	36.3316	133.258	0.0005	0.0027	0.185185	0.0141	0.479	0.0294363	0	NA	NA	3	0.00517706	ENSP00000357362	0	0	0	0	0	0
ENSG00000173171.10	ENSG00000173171	MTX1	1	155178490	155183615	7	2572	5125	protein_coding	0.796412	56.5326	287.613	0.0019	0.0114	0.166667	0.1606	0.5602	0.286683	0	NA	NA	22	0.00883173	ENSP00000357360	0	0	0	0	0	0
ENSG00000177628.11	ENSG00000177628	GBA	1	155204243	155214490	12	2375	10247	protein_coding	0.589592	23.6189	152.721	0.0156	0.028	0.557143	0.0783	0.6112	0.128109	0	NA	NA	7	0.00381217	ENSP00000314508	1	1	0	0	0	0
ENSG00000160767.16	ENSG00000160767	FAM189B	1	155216996	155225274	12	3070	8278	protein_coding	0.398508	17.7806	33.3347	0.0007	0.0105	0.0666667	0.031	0.4802	0.0645564	0	0.028	0.004	NA	0.00256072	NA	0	0	0	0	0	0
ENSG00000116521.6	ENSG00000116521	SCAMP3	1	155225770	155232221	8	1529	6451	protein_coding	0.43345	36.3129	61.1763	0	0.003	0	0.051	0.4226	0.120681	0	0	0.009	4	0.00675177	ENSP00000307275	0	0	0	0	0	0
ENSG00000176444.14	ENSG00000176444	CLK2	1	155232659	155248282	7	2695	15623	protein_coding	0.516622	43.7354	98.8218	0	0.0038	0	0.0135	0.3327	0.0405771	0	0.017	0.002	86	0.00669227	ENSP00000354856	0	0	0	0	0	0
ENSG00000143630.5	ENSG00000143630	HCN3	1	155247374	155259639	8	3710	12265	protein_coding	0.696454	6.74023	18.4709	0.0015	0.021	0.0714286	0.0228	0.5083	0.0448554	4	0.058	0.012	NA	0.000871496	NA	0	0	0	0	0	0
ENSG00000143627.13	ENSG00000143627	PKLR	1	155259630	155271225	11	2468	11595	protein_coding	0.981582	18.0341	228.915	0.0025	0.0026	0.961538	0.0521	0.5993	0.0869348	4	0	NA	431	0.00286285	ENSP00000339933	1	0	0	0	0	0
ENSG00000160752.10	ENSG00000160752	FDPS	1	155278539	155290457	2	2015	11918	protein_coding	0.692269	78.6696	12323.7	0	0.0073	0	0.0857	0.5668	0.1512	0	0	0.035	108	0.0134989	ENSP00000349078	0	0	0	0	0	0
ENSG00000160753.11	ENSG00000160753	RUSC1	1	155290687	155300905	10	3393	10218	protein_coding	0.533116	21.6173	76.59	0.0094	0.0125	0.752	0.1188	0.5911	0.200981	1	0	0.005	86	0.00294449	ENSP00000357336	0	0	0	0	0	0
ENSG00000116539.6	ENSG00000116539	ASH1L	1	155305059	155532598	28	11914	227539	protein_coding	0.327524	11.9502	23.6829	0.0011	0.0059	0.186441	0.0401	0.4099	0.0978287	0	0	0.019	841	0.000395196	ENSP00000376204	0	0	0	0	0	0
ENSG00000125459.10	ENSG00000125459	MSTO1	1	155579979	155718153	13	2477	138174	protein_coding	0.700073	17.9796	14.7956	0.0026	0.0114	0.22807	0.1138	0.4607	0.247015	3	NA	NA	NA	0.00285856	NA	0	0	0	0	0	0
ENSG00000163374.15	ENSG00000163374	YY1AP1	1	155629237	155658791	10	2917	29554	protein_coding	0.575357	62.2246	118.33	0.033	0.0407	0.810811	0.2665	0.5735	0.46469	8	0.001	0.037	NA	0.0091793	NA	0	0	0	0	0	0
ENSG00000132676.11	ENSG00000132676	DAP3	1	155657751	155708801	13	2076	51050	protein_coding	0.44125	38.0633	109.971	0.0012	0.0064	0.1875	0.1019	0.5728	0.177898	2	NA	NA	216	0.00646893	ENSP00000341692	0	1	0	0	0	0
ENSG00000116580.14	ENSG00000116580	GON4L	1	155719508	155829191	32	7681	109683	protein_coding	0.355429	9.18962	3.91837	0.0031	0.0113	0.274336	0.1549	0.5208	0.297427	0	NA	NA	NA	0.000612941	NA	0	0	0	0	0	0
ENSG00000132718.7	ENSG00000132718	SYT11	1	155829300	155854990	4	5236	25690	protein_coding	0.912686	97.4289	1319.05	0.001	0.0126	0.0793651	0.0212	0.5057	0.0419221	0	0	0.022	30	0.0097652	ENSP00000357307	0	0	0	0	0	0
ENSG00000143622.6	ENSG00000143622	RIT1	1	155867599	155881195	6	3439	13596	protein_coding	0.533669	16.7024	75.4225	0.0039	0	NA	0.0256	0.6156	0.0415854	0	NA	NA	43	0.00225914	ENSP00000357306	0	0	0	0	0	0
ENSG00000132680.6	ENSG00000132680	KIAA0907	1	155882834	155904191	13	4486	21357	protein_coding	0.411809	28.4396	65.8701	0	0.0107	0	0.0197	0.3222	0.0611421	0	0.061	0.001	1	0.00322657	ENSP00000357304	0	0	0	0	0	0
ENSG00000173080.4	ENSG00000173080	RXFP4	1	155911480	155912625	1	1145	1145	protein_coding	0.961218	1.65792	1.71985	0.0039	0.0032	1.21875	0.1431	0.6747	0.212094	4	NA	NA	NA	0.00032917	NA	0	0	0	0	0	0
ENSG00000116584.13	ENSG00000116584	ARHGEF2	1	155916630	155976861	26	4412	60231	protein_coding	0.584166	32.1344	94.483	0.0032	0.0109	0.293578	0.0603	0.6497	0.0928121	0	NA	NA	5	0.0036922	ENSP00000354837	0	0	1	0	0	0
ENSG00000163479.9	ENSG00000163479	SSR2	1	155978839	155990750	4	5162	11911	protein_coding	0.436943	130.699	2923.87	0	0	NA	0.0129	0.4946	0.0260817	0	0.022	0.006	209	0.0132969	ENSP00000295702	0	0	0	0	0	0
ENSG00000160803.7	ENSG00000160803	UBQLN4	1	156005092	156023585	11	3565	18493	protein_coding	0.434069	30.2443	85.029	0.0008	0.0112	0.0714286	0.0329	0.3778	0.0870831	0	NA	NA	224	0.00400046	ENSP00000357292	0	0	0	0	0	0
ENSG00000116586.7	ENSG00000116586	LAMTOR2	1	156024543	156028301	2	866	3758	protein_coding	0.368494	25.9966	65.2302	0.0788	0.1217	0.647494	0.0036	0.4837	0.00744263	0	0	NA	21	0.00540114	ENSP00000357288	0	1	0	0	0	0
ENSG00000132698.9	ENSG00000132698	RAB25	1	156030951	156040295	5	1095	9344	protein_coding	0.908416	173.263	5599.9	0	0.0057	0	0.0186	0.4911	0.0378742	0	0	0.021	100	0.0345922	ENSP00000354376	0	0	0	0	0	0
ENSG00000254726.2	ENSG00000254726	MEX3A	1	156041804	156051789	2	6122	9985	protein_coding	0.879032	3.74942	7.57659	0	0.006	0	0.0228	0.508	0.0448819	NA	0	0.007	4	0.000324345	ENSP00000432845	0	0	0	0	0	0
ENSG00000160789.15	ENSG00000160789	LMNA	1	156052364	156109880	12	3178	57516	protein_coding	0.547185	128.513	2571.13	0.0006	0.0156	0.0384615	0.0134	0.6991	0.0191675	0	0	0.148	33	0.0182269	ENSP00000357283	1	0	0	0	0	0
ENSG00000196189.8	ENSG00000196189	SEMA4A	1	156117157	156147543	15	3285	30386	protein_coding	0.882758	51.9014	1207.26	0.0007	0.0175	0.04	0.0958	0.6195	0.154641	3	0.004	0.613	NA	0.00720349	NA	1	0	1	1	0	0
ENSG00000160785.9	ENSG00000160785	SLC25A44	1	156163880	156182587	3	6949	18707	protein_coding	0.661431	15.2687	140.678	0	0	NA	0.0185	0.5755	0.032146	0	0	0.022	2	0.0011529	ENSP00000352497	0	0	0	0	0	0
ENSG00000160783.15	ENSG00000160783	PMF1	1	156182784	156212874	3	1272	30090	protein_coding	0.379898	23.7022	57.6768	0.0071	0.0056	1.26786	0.4972	1.4093	0.352799	NA	NA	NA	19	0.00460115	ENSP00000458021	0	0	0	0	0	0
ENSG00000242252.1	ENSG00000242252	BGLAP	1	156211753	156213112	2	929	1359	protein_coding	0.651879	3.3626	4.60732	0.0043	0	NA	0.2248	1.1868	0.189417	NA	0	0.041	4	0.000690702	ENSP00000357255	0	0	0	0	0	0
ENSG00000160781.11	ENSG00000160781	PAQR6	1	156213206	156217881	7	2110	4675	protein_coding	0.972565	144.791	209274	0.1826	0.4361	0.418711	0.2292	6.1089	0.037519	0	NA	NA	8	0.0244802	ENSP00000338330	0	0	0	0	0	0
ENSG00000198952.7	ENSG00000198952	SMG5	1	156219015	156252620	22	4537	33605	protein_coding	0.339295	39.8282	205.489	0.0019	0.0011	1.72727	0.034	0.4662	0.0729301	0	NA	NA	4	0.00448346	ENSP00000355261	0	0	0	0	0	0
ENSG00000163472.14	ENSG00000163472	TMEM79	1	156252726	156262976	3	2439	10250	protein_coding	0.902226	59.4623	1309.31	0.0012	0.0182	0.0659341	0.0906	0.8064	0.112351	0	0	0.344	NA	0.00950919	NA	0	0	0	0	0	0
ENSG00000198715.7	ENSG00000198715	C1orf85	1	156259880	156265463	6	1598	5583	protein_coding	0.634762	29.114	305.255	0.0036	0.0168	0.214286	0.1414	0.5262	0.268719	1	NA	NA	3	0.00535067	ENSP00000354553	0	0	0	0	0	0
ENSG00000189030.8	ENSG00000189030	VHLL	1	156268415	156269428	1	1013	1013	protein_coding	0.804022	0.143064	0.308714	NA	NA	NA	0.2642	0.8371	0.315613	7	NA	NA	NA	2.9e-05	NA	0	0	0	0	0	0
ENSG00000163468.10	ENSG00000163468	CCT3	1	156278759	156337664	14	2136	58905	protein_coding	0.539526	100.82	522.082	0.0009	0.0086	0.104651	0.0137	0.4951	0.0276712	0	NA	NA	813	0.0169779	ENSP00000295688	0	1	0	0	0	0
ENSG00000163467.7	ENSG00000163467	TSACC	1	156307105	156316786	4	747	9681	protein_coding	0.999366	418.285	15808.7	0.0091	0.0138	0.65942	0.2343	0.413	0.567312	4	NA	NA	NA	0.0885736	NA	0	0	0	0	0	0
ENSG00000132677.8	ENSG00000132677	RHBG	1	156339003	156355011	10	2415	16008	protein_coding	0.95162	18.7528	142.681	0.0051	0.0084	0.607143	0.0856	0.5767	0.148431	0	0.041	NA	1	0.00301663	ENSP00000357229	0	0	0	0	0	0
ENSG00000125462.12	ENSG00000125462	C1orf61	1	156374042	156400493	1	4773	26451	protein_coding	0.99681	28.5412	335.472	0.0033	0.0065	0.507692	NA	NA	NA	4	NA	NA	NA	0.00308666	NA	0	0	0	0	0	0
ENSG00000116604.13	ENSG00000116604	MEF2D	1	156433519	156470620	12	5953	37101	protein_coding	0.611573	56.2025	260.177	0.0009	0.0044	0.204545	0.013	0.3373	0.0385414	0	NA	NA	21	0.00499974	ENSP00000271555	0	0	0	0	0	0
ENSG00000183856.6	ENSG00000183856	IQGAP3	1	156495197	156542396	38	5950	47199	protein_coding	0.819303	5.03348	23.2617	0.0034	0.0122	0.278689	0.0854	0.5369	0.159061	4	0.014	0.006	35	0.000447709	ENSP00000354451	0	0	0	0	0	0
ENSG00000187862.7	ENSG00000187862	TTC24	1	156549519	156556562	11	1994	7043	protein_coding	0.946214	2.38198	2.81886	0.0025	0.0043	0.581395	0.2679	0.6125	0.437388	0	NA	NA	61	0.000409658	ENSP00000357219	0	0	0	0	0	0
ENSG00000163382.7	ENSG00000163382	APOA1BP	1	156561554	156564091	6	1119	2537	protein_coding	0.351272	35.3605	267.839	0.0031	0.0099	0.313131	0.0653	0.6212	0.105119	0	0	0.113	92	0.00705015	ENSP00000357218	0	0	0	0	0	0
ENSG00000160818.12	ENSG00000160818	GPATCH4	1	156564279	156571288	5	2459	7009	protein_coding	0.54625	27.5916	473.709	0.0074	0.0093	0.795699	0.2759	0.7341	0.375834	0	0.018	0	NA	0.0043963	NA	0	0	0	0	0	0
ENSG00000132702.8	ENSG00000132702	HAPLN2	1	156589086	156595517	7	1764	6431	protein_coding	0.948254	19.2004	23365.8	NA	NA	NA	0.0411	0.8487	0.048427	0	NA	NA	2	0.00343398	ENSP00000255039	0	0	0	0	0	0
ENSG00000132692.14	ENSG00000132692	BCAN	1	156611182	156629324	14	3452	18142	protein_coding	0.987325	52.5612	1016.96	0.0015	0.0138	0.108696	0.0921	0.5852	0.157382	0	NA	NA	1	0.0071002	ENSP00000331210	0	0	0	0	0	0
ENSG00000132688.10	ENSG00000132688	NES	1	156638555	156647189	4	5554	8634	protein_coding	0.777291	72.0086	1274.83	0.0077	0.0069	1.11594	0.3099	0.6169	0.50235	0	0.037	NA	NA	0.00684591	NA	0	1	0	0	0	0
ENSG00000143320.4	ENSG00000143320	CRABP2	1	156669398	156675608	4	988	6210	protein_coding	0.948345	549.453	109641	0	0.0089	0	0.0334	0.5419	0.061635	0	0	0.421	9	0.111751	ENSP00000357204	0	0	0	0	0	0
ENSG00000143319.12	ENSG00000143319	ISG20L2	1	156691683	156698591	3	3300	6908	protein_coding	0.882126	39.6863	98.637	0	0.0054	0	0.1768	0.631	0.28019	0	NA	NA	375	0.00549642	ENSP00000323424	0	0	0	0	0	0
ENSG00000143303.7	ENSG00000143303	RRNAD1	1	156698234	156706752	8	2246	8518	protein_coding	0.467574	20.4892	25.4807	0.0052	0.0046	1.13043	0.0779	0.4455	0.17486	0	0.1	NA	NA	0.0033834	NA	0	0	0	0	0	0
ENSG00000143314.8	ENSG00000143314	MRPL24	1	156707095	156711382	6	984	4287	protein_coding	0.412082	35.1745	73.7404	0	0	NA	0.0641	0.5678	0.112892	0	0	0.082	390	0.00716988	ENSP00000354525	0	0	0	0	0	0
ENSG00000143321.14	ENSG00000143321	HDGF	1	156711899	156736717	6	2374	24818	protein_coding	0.366038	73.7176	477.537	0.0016	0.0343	0.0466472	0.1209	0.5552	0.217759	0	0.02	0.037	18	0.0119069	ENSP00000357189	0	0	0	0	0	0
ENSG00000143294.10	ENSG00000143294	PRCC	1	156720402	156770607	7	2096	50205	protein_coding	0.31627	30.3209	74.9188	0	0.0075	0	0.0337	0.3671	0.0918006	0	0	0	33	0.00512746	ENSP00000271526	1	0	0	0	0	0
ENSG00000027869.7	ENSG00000027869	SH2D2A	1	156776035	156786654	9	1664	10619	protein_coding	0.944611	22.4161	810.717	0.0047	0.0068	0.691176	0.2269	0.7769	0.292058	2	0	0.005	NA	0.00407366	NA	0	0	0	0	0	0
ENSG00000198400.7	ENSG00000198400	NTRK1	1	156785432	156851642	17	3035	66210	protein_coding	0.754017	3.103	8.15045	0.0011	0.0127	0.0866142	0.0754	0.6419	0.117464	0	0	0	NA	0.000448577	NA	1	1	0	0	0	0
ENSG00000027644.4	ENSG00000027644	INSRR	1	156809855	156828810	22	5079	18955	protein_coding	0.886119	2.47823	3.37907	0.0024	0.01	0.24	0.058	0.6737	0.0860917	1	0	NA	740	0.000255235	ENSP00000357178	0	0	0	0	0	0
ENSG00000187800.9	ENSG00000187800	PEAR1	1	156863490	156886226	24	4946	22736	protein_coding	0.648251	27.557	83.5025	0.007	0.0158	0.443038	0.0902	0.631	0.142948	NA	0	0.122	210	0.00290421	ENSP00000292357	0	0	0	0	0	0
ENSG00000160838.9	ENSG00000160838	LRRC71	1	156890442	156902886	15	1944	12444	protein_coding	0.988341	32.6356	210.031	0.001	0.0369	0.0271003	0.1059	0.7384	0.143418	2	0.01	NA	5	0.00565825	ENSP00000336661	0	0	0	0	0	0
ENSG00000132694.14	ENSG00000132694	ARHGEF11	1	156904632	157015162	41	6848	110530	protein_coding	0.64157	23.4442	22.0943	0.0025	0.0061	0.409836	0.075	0.4345	0.172612	0	0	0.066	1	0.0017932	ENSP00000357177	0	0	0	0	0	0
ENSG00000253831.1	ENSG00000253831	ETV3L	1	157061836	157069600	5	1971	7764	protein_coding	0.974413	0.816519	1.25512	0.0091	0.0034	2.67647	NA	NA	NA	NA	NA	0.061	NA	0.000141167	NA	0	0	0	0	0	0
ENSG00000117036.7	ENSG00000117036	ETV3	1	157090983	157108266	5	5249	17283	protein_coding	0.749058	17.4194	27.5193	0.0029	0.0043	0.674419	0.0727	0.4777	0.152188	0	0.033	0	NA	0.00174073	NA	0	0	0	0	0	0
ENSG00000143297.14	ENSG00000143297	FCRL5	1	157483167	157522310	17	5373	39143	protein_coding	0.967909	23.422	177.618	0.013	0.0211	0.616114	0.441	0.702	0.628205	4	0	0.473	3	0.00229308	ENSP00000354691	0	0	0	0	0	0
ENSG00000163518.6	ENSG00000163518	FCRL4	1	157543539	157567870	12	3447	24331	protein_coding	0.975002	2.00681	9.54348	0.0104	0.0176	0.590909	NA	NA	NA	4	NA	NA	NA	0.000271546	NA	0	0	1	1	0	0
ENSG00000160856.16	ENSG00000160856	FCRL3	1	157644111	157670647	15	4710	26536	protein_coding	0.977354	18.0266	110.516	0.0093	0.0107	0.869159	NA	NA	NA	3	0.001	0.481	2	0.00197005	ENSP00000357167	0	0	0	0	0	0
ENSG00000132704.11	ENSG00000132704	FCRL2	1	157715523	157746922	7	4441	31399	protein_coding	0.979466	33.6262	686.601	0.0076	0.0114	0.666667	0.5005	1.1302	0.442842	5	0	0.041	2	0.00384609	ENSP00000355157	0	0	0	0	0	0
ENSG00000163534.10	ENSG00000163534	FCRL1	1	157764193	157789895	7	2947	25702	protein_coding	0.976118	21.6675	255.75	0.0064	0.0183	0.349727	0.3062	0.5195	0.589413	4	0	0.039	6	0.00318645	ENSP00000357158	0	0	0	0	0	0
ENSG00000073754.5	ENSG00000073754	CD5L	1	157800704	157868046	6	2185	67342	protein_coding	0.999397	281.542	20621.7	0.0067	0.0177	0.378531	0.2201	0.6042	0.364283	4	0	NA	1	0.0470181	ENSP00000357156	0	0	0	0	0	0
ENSG00000183853.13	ENSG00000183853	KIRREL	1	157963063	158070052	11	6859	106989	protein_coding	0.816778	45.0519	580.047	0.0034	0.0126	0.269841	0.0236	0.6697	0.0352397	0	0	NA	1	0.00344979	ENSP00000352138	0	1	0	0	0	0
ENSG00000158473.6	ENSG00000158473	CD1D	1	158149737	158154686	7	2246	4949	protein_coding	0.907138	23.4593	99.7199	0.0089	0.0138	0.644928	0.2562	0.5787	0.442716	3	0	0.038	NA	0.00387853	NA	0	0	1	0	0	0
ENSG00000158477.6	ENSG00000158477	CD1A	1	158223927	158228059	6	2090	4132	protein_coding	0.956129	5.53751	11.1106	0.0171	0.0165	1.03636	NA	NA	NA	4	0	0.271	NA	0.000938434	NA	0	0	1	1	0	0
ENSG00000158481.8	ENSG00000158481	CD1C	1	158259576	158263420	6	1429	3844	protein_coding	0.954021	20.1441	163.797	0.0074	0.0269	0.275093	NA	NA	NA	5	0.051	0.049	NA	0.00380143	NA	0	0	1	1	0	0
ENSG00000158485.6	ENSG00000158485	CD1B	1	158297741	158301321	6	1389	3580	protein_coding	0.804861	0.315872	0.231044	0.0032	0.0145	0.22069	NA	NA	NA	5	NA	0.13	NA	6.02e-05	NA	0	0	1	1	0	0
ENSG00000158488.11	ENSG00000158488	CD1E	1	158323254	158327343	5	1815	4089	protein_coding	0.825066	1.01593	0.667362	0.0157	0.0082	1.91463	NA	NA	NA	4	0	0.208	NA	0.000180886	NA	0	0	1	1	0	0
ENSG00000186306.1	ENSG00000186306	OR10T2	1	158368312	158369256	1	944	944	protein_coding	0.965262	0.0261074	0.00144592	0.0073	0	NA	0.399	8.369	0.0476759	4	NA	NA	NA	5.35e-06	NA	0	0	0	0	1	0
ENSG00000180708.4	ENSG00000180708	OR10K2	1	158389718	158390656	1	938	938	protein_coding	0.898999	0.0120779	0.00254	0.0062	0.0223	0.278027	0.1191	0.7492	0.15897	4	NA	NA	NA	2.48e-06	NA	0	0	0	0	1	0
ENSG00000173285.2	ENSG00000173285	OR10K1	1	158435272	158436344	1	1072	1072	protein_coding	0.894795	0.0126723	0.000385931	0.0123	0.0188	0.654255	0.4804	8.7416	0.0549556	4	NA	NA	NA	2.55e-06	NA	0	0	0	0	1	0
ENSG00000198965.3	ENSG00000198965	OR10R2	1	158449668	158450675	1	1007	1007	protein_coding	0.927238	0.0338603	0.00191024	0.003	0.0064	0.46875	0.3675	59.1597	0.006212	4	NA	NA	NA	6.88e-06	NA	0	0	0	0	1	0
ENSG00000197532.1	ENSG00000197532	OR6Y1	1	158516918	158517895	1	977	977	protein_coding	0.921812	0.0115346	0.000798286	0.0136	0.0139	0.978417	0.0883	0.5991	0.147388	4	NA	NA	NA	2.35e-06	NA	0	0	0	0	1	0
ENSG00000186440.1	ENSG00000186440	OR6P1	1	158532441	158533394	1	953	953	protein_coding	0.995978	0.0253374	0.00102703	0.0059	0.012	0.491667	0.0517	0.5734	0.0901639	4	NA	NA	NA	5.18e-06	NA	0	0	0	0	1	0
ENSG00000186400.3	ENSG00000186400	OR10X1	1	158548709	158549689	1	980	980	protein_coding	0.96639	0.0289303	0.00253814	0.0146	0.015	0.973333	0.097	0.5049	0.192117	4	NA	NA	NA	5.89e-06	NA	0	0	0	0	1	0
ENSG00000198967.3	ENSG00000198967	OR10Z1	1	158576229	158577170	1	941	941	protein_coding	0.906205	0.0248628	0.00295354	0.0045	0.0155	0.290323	0.0682	0.7188	0.0948804	4	NA	NA	NA	5.11e-06	NA	0	0	0	0	1	0
ENSG00000163554.7	ENSG00000163554	SPTA1	1	158580496	158656488	52	7947	75992	protein_coding	0.942481	1.54241	14.0957	0.0123	0.0186	0.66129	0.1156	0.651	0.177573	4	NA	NA	NA	9.83e-05	NA	1	1	0	0	0	0
ENSG00000196171.2	ENSG00000196171	OR6K2	1	158669369	158670486	1	1117	1117	protein_coding	0.912285	0.0109433	0.000395798	0.0185	0.0136	1.36029	0.095	0.6087	0.15607	4	NA	NA	NA	2.17e-06	NA	0	0	0	0	1	0
ENSG00000203757.1	ENSG00000203757	OR6K3	1	158686958	158687953	1	995	995	protein_coding	0.97039	0.18224	0.0973738	0.0124	0.0222	0.558559	0.142	1.5087	0.0941208	4	NA	NA	NA	3.7e-05	NA	0	0	0	0	1	0
ENSG00000180433.4	ENSG00000180433	OR6K6	1	158724510	158725681	1	1171	1171	protein_coding	0.89328	0.01488	0.000720045	0.0114	0.0033	3.45455	0.0909	0.5758	0.157867	4	NA	NA	NA	2.94e-06	NA	0	0	0	0	1	0
ENSG00000197403.2	ENSG00000197403	OR6N1	1	158735466	158736492	1	1026	1026	protein_coding	0.915047	0.0465805	0.00867252	0.0099	0.0033	3	0.0659	0.6254	0.105373	4	NA	NA	NA	9.43e-06	NA	0	0	0	0	1	0
ENSG00000188340.1	ENSG00000188340	OR6N2	1	158746472	158747425	1	953	953	protein_coding	0.887872	0.0167082	0.00135173	0.008	0.0033	2.42424	0.0817	0.5414	0.150905	4	NA	NA	NA	3.42e-06	NA	0	0	0	0	1	0
ENSG00000163563.7	ENSG00000163563	MNDA	1	158801107	158819296	7	1745	18189	protein_coding	0.990607	490.762	160733	0.0024	0.0162	0.148148	0.4448	1.1677	0.38092	5	0	0.164	NA	0.0880955	NA	0	0	1	0	0	0
ENSG00000163564.10	ENSG00000163564	PYHIN1	1	158900586	158946844	9	2074	46258	protein_coding	0.917508	7.11077	62.8696	0.0054	0.0144	0.375	0.4367	1.2958	0.337012	4	0	0.076	NA	0.0012076	NA	0	0	0	0	0	0
ENSG00000163565.14	ENSG00000163565	IFI16	1	158969758	159024945	10	4128	55187	protein_coding	0.734885	117.565	1448.45	0.0076	0.0069	1.10145	0.6966	2.4959	0.279098	4	0.007	0.037	3	0.0142306	ENSP00000357113	0	0	1	0	0	0
ENSG00000163568.9	ENSG00000163568	AIM2	1	159032274	159116886	6	1523	84612	protein_coding	0.923778	17.9431	142.843	0.0175	0.0464	0.377155	0.3595	1.0498	0.342446	5	0	0.022	1	0.00333272	ENSP00000357112	0	0	1	0	0	0
ENSG00000162706.8	ENSG00000162706	CADM3	1	159141399	159173103	9	3736	31704	protein_coding	0.8593	73.9532	9534.42	0	0.0266	0	0.0233	0.4895	0.0475996	0	0.009	NA	NA	0.00952697	NA	0	0	0	0	0	0
ENSG00000213088.5	ENSG00000213088	DARC	1	159173097	159176290	3	1899	3193	protein_coding	0.755016	182.623	14398.7	0.0209	0.0226	0.924779	0.3467	0.6439	0.538438	2	0	0.094	NA	0.0320018	NA	0	0	0	0	0	0
ENSG00000179639.6	ENSG00000179639	FCER1A	1	159259504	159278014	6	1159	18510	protein_coding	0.823584	7.59836	23.941	0.0056	0.0188	0.297872	0.4005	0.5229	0.765921	4	0	0.072	1	0.00150353	ENSP00000357097	0	0	1	1	0	0
ENSG00000196266.4	ENSG00000196266	OR10J3	1	159283460	159284449	1	989	989	protein_coding	0.971102	0.099583	0.0196258	NA	NA	NA	0.1404	0.8043	0.174562	4	NA	NA	NA	2.03e-05	NA	0	0	0	0	1	0
ENSG00000196184.7	ENSG00000196184	OR10J1	1	159409512	159410600	1	1088	1088	protein_coding	0.999666	7.66864	15.4435	NA	NA	NA	0.1367	1.198	0.114107	4	0	NA	NA	0.00153545	NA	0	0	0	0	1	0
ENSG00000184155.7	ENSG00000184155	OR10J5	1	159504793	159505842	1	1049	1049	protein_coding	0.947468	0.0458429	0.00330754	0.0083	0.0067	1.23881	0.0716	0.5636	0.12704	4	NA	NA	NA	9.23e-06	NA	0	0	0	0	1	0
ENSG00000132703.3	ENSG00000132703	APCS	1	159557615	159558655	2	924	1040	protein_coding	0.999788	1027.61	147632	0.0087	0.0103	0.84466	0.225	0.7574	0.297069	4	0	NA	17	0.211909	ENSP00000255040	0	0	1	0	0	0
ENSG00000132693.8	ENSG00000132693	CRP	1	159682079	159684379	2	2013	2300	protein_coding	0.999398	4790.2	1.96479e+07	0.0042	0.0054	0.777778	0.1937	0.7616	0.254333	0	0	NA	26	0.821873	ENSP00000255030	0	0	0	0	0	0
ENSG00000158716.4	ENSG00000158716	DUSP23	1	159750722	159752333	2	754	1611	protein_coding	0.683321	92.2091	4268.58	0	0.0098	0	0.0214	0.5625	0.0380444	0	0	0.165	26	0.0195143	ENSP00000357087	0	0	0	0	0	0
ENSG00000181036.9	ENSG00000181036	FCRL6	1	159770301	159786041	11	1986	15740	protein_coding	0.954114	10.5494	204.159	0.0106	0.0146	0.726027	0.4757	0.7014	0.678215	4	0	0.014	NA	0.00180973	NA	0	0	0	0	0	0
ENSG00000158714.6	ENSG00000158714	SLAMF8	1	159796540	159807039	5	2991	10499	protein_coding	0.840733	6.82962	26.8299	0.0037	0.0159	0.232704	0.1597	0.5665	0.281906	4	0	0.028	1	0.000995593	ENSP00000289707	0	0	0	0	0	0
ENSG00000188004.5	ENSG00000188004	C1orf204	1	159804264	159825137	6	2495	20873	protein_coding	0.630477	3.22593	29.8577	NA	NA	NA	NA	NA	NA	2	0.005	0.141	NA	0.000511416	NA	0	0	0	0	0	0
ENSG00000243284.1	ENSG00000243284	VSIG8	1	159824106	159832447	7	1811	8341	protein_coding	0.938772	18.5299	2023.6	0.0032	0.0125	0.256	0.0751	0.3918	0.191679	NA	0	0.123	NA	0.00328296	NA	0	0	0	0	0	0
ENSG00000213085.5	ENSG00000213085	CCDC19	1	159842154	159869953	12	1964	27799	protein_coding	0.969815	29.5858	188.216	0	0.0144	0	0.0854	0.7354	0.116127	0	0	0.144	NA	0.00512045	NA	0	0	0	0	0	0
ENSG00000269620.1	ENSG00000269620	AL590560.1	1	159879884	159880159	1	275	275	protein_coding	0.797061	0.893274	3.04127	NA	NA	NA	NA	NA	NA	NA	0	NA	NA	0.000204716	NA	0	0	0	0	0	0
ENSG00000158710.10	ENSG00000158710	TAGLN2	1	159887897	159895522	5	1599	7625	protein_coding	0.731581	483.782	94706.5	0	0.0188	0	0.0156	0.5787	0.026957	NA	0	0.147	93	0.0889791	ENSP00000357075	0	0	0	0	0	0
ENSG00000085552.12	ENSG00000085552	IGSF9	1	159896829	159915386	10	4195	18557	protein_coding	0.814877	11.7946	131.9	0.0068	0.0227	0.299559	0.0733	0.4624	0.158521	1	0	0.307	1	0.00140726	ENSP00000357073	0	0	0	0	0	0
ENSG00000162723.5	ENSG00000162723	SLAMF9	1	159921282	159924044	4	1152	2762	protein_coding	0.907453	0.966107	2.19418	0.0199	0.0224	0.888393	0.296	0.6293	0.470364	3	0.198	NA	NA	0.00019133	NA	0	0	0	0	0	0
ENSG00000143315.5	ENSG00000143315	PIGM	1	159997462	160001783	1	4321	4321	protein_coding	0.41263	4.1187	5.63403	0.001	0.0206	0.0485437	0.0528	0.6524	0.0809319	0	0	0.306	37	0.000481134	ENSP00000357069	1	0	0	0	0	0
ENSG00000177807.6	ENSG00000177807	KCNJ10	1	160007257	160040038	2	5291	32781	protein_coding	0.983115	30.428	894.994	0	0.0133	0	0.0037	0.5615	0.00658949	4	0	0.222	NA	0.00302005	NA	1	1	0	0	0	0
ENSG00000162728.4	ENSG00000162728	KCNJ9	1	160051360	160060353	3	4167	8993	protein_coding	0.997657	44.2724	279.155	0	0.0367	0	0.0062	0.8264	0.00750242	1	0	NA	NA	0.00530789	NA	0	0	0	0	0	0
ENSG00000162729.9	ENSG00000162729	IGSF8	1	160061130	160068733	7	2359	7603	protein_coding	0.734378	78.4753	700.39	0.0121	0.0334	0.362275	0.0643	0.5025	0.12796	0	0	0.189	NA	0.0127142	NA	0	0	0	0	0	0
ENSG00000018625.10	ENSG00000018625	ATP1A2	1	160085549	160113381	23	5398	27832	protein_coding	0.920944	303.635	15485.7	NA	NA	NA	0.004	0.6139	0.00651572	0	0	NA	128	0.0296665	ENSP00000354490	1	1	0	0	0	0
ENSG00000132681.12	ENSG00000132681	ATP1A4	1	160121360	160156767	15	3901	35407	protein_coding	0.986737	12.9892	22.6156	0.0083	0.0202	0.410891	0.1001	0.6961	0.143801	0	0	0.827	128	0.00162825	ENSP00000357060	0	0	0	0	0	0
ENSG00000143318.8	ENSG00000143318	CASQ1	1	160160285	160171676	11	1945	11391	protein_coding	0.994827	474.994	121479	0.0011	0.013	0.0846154	0.0248	0.4294	0.057755	1	0	0.828	74	0.0824301	ENSP00000357057	0	0	0	0	0	0
ENSG00000162734.8	ENSG00000162734	PEA15	1	160175127	160185166	6	2688	10039	protein_coding	0.748891	324.068	90454.8	0	0.0093	0	0.0032	0.3234	0.00989487	0	0	0.1	1	0.0496757	ENSP00000353660	0	0	0	0	0	0
ENSG00000132716.14	ENSG00000132716	DCAF8	1	160185505	160254920	14	3958	69415	protein_coding	0.424784	17.1522	25.0997	0	0.0109	0	0.0158	0.3472	0.0455069	0	NA	NA	1	0.00213392	ENSP00000318227	0	0	0	0	0	0
ENSG00000258465.2	ENSG00000258465	DCAF8	1	160187254	160254920	18	2617	67666	protein_coding	0.710025	0.838043	0.33202	0	0.0093	0	0.0158	0.3472	0.0455069	NA	NA	NA	16	0.000130012	ENSP00000451235	0	0	0	0	0	0
ENSG00000162735.14	ENSG00000162735	PEX19	1	160246602	160256138	8	3653	9536	protein_coding	0.562412	9.3173	21.1514	0	0.0197	0	0.0533	0.5782	0.0921826	0	NA	NA	16	0.0012166	ENSP00000357051	1	0	0	0	0	0
ENSG00000122218.10	ENSG00000122218	COPA	1	160259063	160313190	33	4756	54127	protein_coding	0.496738	75.6829	354.167	0.0008	0.0051	0.156863	0.0074	0.3982	0.0185836	0	0.059	0.033	150	0.00822186	ENSP00000357048	0	0	0	0	0	0
ENSG00000162736.11	ENSG00000162736	NCSTN	1	160313062	160328742	18	3013	15680	protein_coding	0.45358	42.7721	164.229	0.0014	0.0114	0.122807	0.0599	0.447	0.134004	0	0.004	0.238	40	0.00621602	ENSP00000294785	0	1	0	0	0	0
ENSG00000171786.5	ENSG00000171786	NHLH1	1	160336857	160342638	2	2561	5781	protein_coding	0.7341	0.630206	0.827963	0	0.0366	0	0.0334	0.696	0.0479885	0	0	0.044	NA	9.87e-05	NA	0	0	0	0	0	0
ENSG00000162738.5	ENSG00000162738	VANGL2	1	160370376	160398468	8	5332	28092	protein_coding	0.794568	21.3909	45.4493	0.0029	0.0251	0.115538	0.0025	0.7899	0.00316496	0	0.032	0	11	0.00211147	ENSP00000357040	0	1	0	0	0	0
ENSG00000162739.9	ENSG00000162739	SLAMF6	1	160454820	160493052	8	2735	38232	protein_coding	0.958467	49.2663	181.175	0.0136	0.0131	1.03817	0.5015	0.68	0.7375	3	0.015	0.018	NA	0.00749968	NA	0	0	1	1	0	0
ENSG00000066294.10	ENSG00000066294	CD84	1	160510885	160549306	7	8174	38421	protein_coding	0.86992	9.08769	12.4965	0.0044	0.0032	1.375	0.2796	0.4222	0.662245	4	0.014	0.141	10	0.000558436	ENSP00000312367	0	0	1	1	0	0
ENSG00000117090.10	ENSG00000117090	SLAMF1	1	160577890	160617085	7	3999	39195	protein_coding	0.992794	81.3791	660.608	0.0015	0.0031	0.483871	0.278	0.5483	0.507022	5	NA	NA	12	0.0100301	ENSP00000306190	0	0	1	1	0	0
ENSG00000117091.5	ENSG00000117091	CD48	1	160648536	160681641	2	1791	33105	protein_coding	0.984812	269.584	7892.71	0.0664	0.1654	0.401451	0.4271	0.7755	0.550741	5	0	0.024	39	0.0480735	ENSP00000357025	0	0	1	1	0	0
ENSG00000026751.12	ENSG00000026751	SLAMF7	1	160709037	160724611	2	3540	15574	protein_coding	0.985014	156.747	1861.26	0.0088	0.0204	0.431373	0.3867	0.5938	0.651229	3	0	0.044	3	0.020884	ENSP00000357022	0	0	1	1	0	0
ENSG00000122224.13	ENSG00000122224	LY9	1	160765864	160798051	2	5081	32187	protein_coding	0.930078	11.0082	125.878	0.0132	0.0203	0.650246	0.3384	0.5425	0.623779	3	NA	NA	8	0.00113171	ENSP00000357020	0	0	1	1	0	0
ENSG00000122223.8	ENSG00000122223	CD244	1	160799950	160832692	9	2454	32742	protein_coding	0.928447	10.207	94.6322	0.0232	0.0071	3.26761	0.3996	0.6563	0.608868	3	0	0.127	NA	0.00162608	NA	0	0	1	1	0	0
ENSG00000179914.4	ENSG00000179914	ITLN1	1	160846329	160854960	8	1175	8631	protein_coding	0.977578	422.99	458659	0.0143	0.0185	0.772973	0.1163	0.791	0.147029	4	0.034	0.128	NA	0.0834605	NA	0	0	0	0	0	0
ENSG00000158764.6	ENSG00000158764	ITLN2	1	160914815	160924589	8	1143	9774	protein_coding	0.992399	73.0573	5774.57	0.0062	0.02	0.31	NA	NA	NA	0	0	0.205	NA	0.0145002	NA	0	0	0	0	0	0
ENSG00000158769.13	ENSG00000158769	F11R	1	160965001	160991138	9	1236	26137	protein_coding	0.983961	0.469699	0.169665	0	0	NA	0.2058	0.5836	0.352639	3	NA	0.029	NA	9.18e-05	NA	0	1	0	0	0	0
ENSG00000270149.1	ENSG00000270149	F11R	1	160967747	161008752	13	2083	41005	protein_coding	0.748815	0.858378	0.290058	NA	NA	NA	NA	NA	NA	NA	0.026	0.029	4	0.000145508	ENSP00000289779	0	0	0	0	0	0
ENSG00000215845.6	ENSG00000215845	TSTD1	1	161007421	161008780	2	811	1359	protein_coding	0.7203	81.4961	942.339	0.0246	0.0451	0.545455	0.0908	0.8089	0.112251	4	0.036	0.197	16	0.0170865	ENSP00000388293	0	0	0	0	0	0
ENSG00000158773.10	ENSG00000158773	USF1	1	161009041	161015767	11	1796	6726	protein_coding	0.670679	77.6405	447.592	0.0015	0.0044	0.340909	0.0076	0.4611	0.0164823	0	0.019	0.339	NA	0.0138052	NA	0	0	0	0	0	0
ENSG00000186517.9	ENSG00000186517	ARHGAP30	1	161016736	161039760	10	4847	23024	protein_coding	0.922017	100.232	2482.59	0.0019	0.0102	0.186275	0.1432	0.4828	0.296603	0	0	0	4	0.0106976	ENSP00000356992	0	0	0	0	0	0
ENSG00000268154.1	ENSG00000268154	AL591806.1	1	161035655	161035943	2	148	288	protein_coding	0.879734	0.0509729	0.0137885	NA	NA	NA	NA	NA	NA	NA	NA	NA	NA	1.19e-05	NA	0	0	0	0	0	0
ENSG00000143217.7	ENSG00000143217	PVRL4	1	161040785	161059389	9	3493	18604	protein_coding	0.912542	91.1893	2205.56	0	0.0126	0	0.0433	0.5157	0.0839635	1	0	NA	NA	0.0122268	NA	1	0	0	0	0	0
ENSG00000162755.9	ENSG00000162755	KLHDC9	1	161068151	161070136	4	1329	1985	protein_coding	0.94862	73.8062	429.727	0.0029	0.006	0.483333	0.0945	0.5659	0.166991	1	0.025	0.119	266	0.0141921	ENSP00000356990	0	0	0	0	0	0
ENSG00000143256.4	ENSG00000143256	PFDN2	1	161070346	161087901	4	673	17555	protein_coding	0.492142	86.4293	941.985	0	0.0129	0	0.0213	0.3446	0.0618108	0	0	0.007	197	0.0185353	ENSP00000356989	0	1	0	0	0	0
ENSG00000158793.9	ENSG00000158793	NIT1	1	161087876	161095235	7	2074	7359	protein_coding	0.628875	46.5314	90.3892	0.0059	0.007	0.842857	0.0919	0.288	0.319097	0	0	0.102	53	0.00789779	ENSP00000356988	0	0	0	0	0	0
ENSG00000158796.12	ENSG00000158796	DEDD	1	161090764	161102478	6	2446	11714	protein_coding	0.349522	14.8732	22.022	0	0.0092	0	0.006	0.2503	0.0239712	0	NA	NA	2	0.00237851	ENSP00000356985	0	0	0	0	0	0
ENSG00000143222.7	ENSG00000143222	UFC1	1	161122566	161128646	6	1108	6080	protein_coding	0.304311	45.6611	127.045	0.0028	0.022	0.127273	0.014	0.3684	0.0380022	0	0	0.007	49	0.00911817	ENSP00000356982	0	0	0	0	0	0
ENSG00000143258.11	ENSG00000143258	USP21	1	161129240	161135513	9	2505	6273	protein_coding	0.395811	20.8916	30.1231	0.0009	0.0097	0.0927835	0.0177	0.2536	0.069795	0	0	0.005	21	0.00330365	ENSP00000289865	0	0	0	0	0	0
ENSG00000143224.13	ENSG00000143224	PPOX	1	161136200	161147803	11	2460	11603	protein_coding	0.426023	12.3545	114.935	0	0.0094	0	0.0722	0.4224	0.170928	0	NA	NA	46	0.00197482	ENSP00000343943	1	0	0	0	0	0
ENSG00000158850.10	ENSG00000158850	B4GALT3	1	161141100	161147287	5	3173	6187	protein_coding	0.479428	34.2381	83.8119	0.0013	0.0144	0.0902778	0.0139	0.4435	0.0313416	0	0	0.025	NA	0.00483627	NA	0	0	0	0	0	0
ENSG00000158859.9	ENSG00000158859	ADAMTS4	1	161154098	161168846	9	9764	14748	protein_coding	0.835265	57.0428	7899.93	0.0017	0.0059	0.288136	0.0495	0.4709	0.105118	1	NA	NA	NA	0.00268638	NA	0	0	0	0	0	0
ENSG00000158864.8	ENSG00000158864	NDUFS2	1	161166894	161184185	13	2051	17291	protein_coding	0.548603	68.9644	545.094	0.001	0.0029	0.344828	0.0413	0.3856	0.107106	0	0.062	0.203	242	0.0117643	ENSP00000356972	1	0	0	0	0	0
ENSG00000158869.6	ENSG00000158869	FCER1G	1	161185024	161190489	5	586	5465	protein_coding	0.96927	846.317	357654	0.2564	0.1404	1.82621	0.0647	0.3251	0.199016	3	0.019	0.545	16	0.184143	ENSP00000289902	0	0	1	1	0	0
ENSG00000268387.1	ENSG00000268387	AL590714.1	1	161190160	161192296	2	229	2136	protein_coding	NA	0	0	NA	NA	NA	NA	NA	NA	NA	NA	NA	NA	0	NA	0	0	0	0	0	0
ENSG00000158874.7	ENSG00000158874	APOA2	1	161192082	161193421	2	925	1339	protein_coding	0.999842	3160.85	2.18476e+06	0.0189	0.0128	1.47656	0.2919	0.6288	0.464218	3	NA	NA	NA	0.650022	NA	1	0	1	0	0	0
ENSG00000158882.8	ENSG00000158882	TOMM40L	1	161195793	161200408	10	2698	4615	protein_coding	0.490855	5.26732	5.59939	0	0.0142	0	0.0108	0.3249	0.033241	1	0.158	0.371	279	0.00080665	ENSP00000356966	0	0	0	0	0	0
ENSG00000143257.7	ENSG00000143257	NR1I3	1	161199456	161208092	9	1464	8636	protein_coding	0.996303	54.7951	745.415	0.0015	0.0028	0.535714	0.1609	0.5222	0.308119	NA	0.033	0.032	10	0.0103038	ENSP00000356958	0	0	0	0	0	0
ENSG00000248485.1	ENSG00000248485	PCP4L1	1	161228517	161255240	3	1421	26723	protein_coding	0.950518	67.4007	7898.8	0	0	NA	0.0699	0.4051	0.17255	NA	0	0.023	NA	0.0127641	NA	0	0	0	0	0	0
ENSG00000158887.11	ENSG00000158887	MPZ	1	161274525	161279762	6	1949	5237	protein_coding	0.997154	2154.05	1.10168e+06	0.0018	0.0243	0.0740741	0.029	0.3527	0.0822229	0	0.001	0.083	2	0.372856	ENSP00000431538	1	0	0	0	0	0
ENSG00000143252.10	ENSG00000143252	SDHC	1	161284047	161332984	6	1414	48937	protein_coding	0.562019	56.9305	579.048	0.3573	0.7103	0.503027	0.128	0.3827	0.334466	1	NA	NA	347	0.0107882	ENSP00000356953	1	0	0	0	0	0
ENSG00000188931.3	ENSG00000188931	C1orf192	1	161334521	161337664	5	769	3143	protein_coding	0.897594	25.1369	1181.56	0.0054	0	NA	0.1382	0.343	0.402915	1	0.15	0.02	1	0.00529918	ENSP00000356951	0	0	0	0	0	0
ENSG00000143226.9	ENSG00000143226	FCGR2A	1	161475220	161493803	7	2405	18583	protein_coding	0.972974	214.695	20504.1	0.0092	0.0073	1.26027	0.3983	0.9234	0.431341	8	NA	NA	11	0.0345562	ENSP00000271450	0	0	1	0	0	0
ENSG00000173110.6	ENSG00000173110	HSPA6	1	161494036	161496681	1	2645	2645	protein_coding	0.962863	189.862	52339.5	NA	NA	NA	NA	NA	NA	7	0	0.082	578	0.0293404	ENSP00000310219	0	0	0	0	0	0
ENSG00000203747.5	ENSG00000203747	FCGR3A	1	161511549	161600917	5	2305	89368	protein_coding	0.931864	151.329	6100.43	0.0126	0.0047	2.68085	0.2621	0.749	0.349933	NA	0.016	0.012	28	0.0246777	ENSP00000356946	0	0	1	0	0	0
ENSG00000072694.14	ENSG00000072694	FCGR2B	1	161551101	161648444	6	4674	97343	protein_coding	0.821829	17.6401	57.4264	0.0016	0.0275	0.0581818	0.4296	0.9773	0.439578	3	0	0.52	9	0.00193787	ENSP00000351497	0	0	1	0	0	0
ENSG00000162747.5	ENSG00000162747	FCGR3B	1	161592986	161601753	5	2284	8767	protein_coding	0.996225	681.363	289105	0.0237	0.0087	2.72414	0.2566	0.707	0.362942	12	0	0.016	12	0.111685	ENSP00000294800	0	0	1	0	0	0
ENSG00000132185.12	ENSG00000132185	FCRLA	1	161676762	161684142	3	2900	7380	protein_coding	0.982088	51.0646	575.567	0.0054	0.0079	0.683544	0.1838	0.529	0.347448	3	0.025	0.022	6	0.00756259	ENSP00000356936	0	0	0	0	0	0
ENSG00000162746.10	ENSG00000162746	FCRLB	1	161691353	161697933	2	1987	6580	protein_coding	0.767062	2.0435	1.99877	0.0021	0.0097	0.216495	0.0918	0.6525	0.14069	3	0	0.106	NA	0.000351546	NA	0	0	1	0	0	0
ENSG00000081721.7	ENSG00000081721	DUSP12	1	161719548	161727028	6	1264	7480	protein_coding	0.40615	13.6155	29.714	0	0.0057	0	0.0961	0.6336	0.151673	0	NA	NA	143	0.00264384	ENSP00000356920	0	0	0	0	0	0
ENSG00000118217.5	ENSG00000118217	ATF6	1	161736084	161933860	16	7480	197776	protein_coding	0.363244	10.8081	45.087	0.0028	0.0142	0.197183	0.0767	0.505	0.151881	0	0.065	0.121	122	0.000744868	ENSP00000356919	0	0	0	0	0	0
ENSG00000162745.6	ENSG00000162745	OLFML2B	1	161952982	161993644	8	3152	40662	protein_coding	0.727358	25.1476	168.46	0.0075	0.0299	0.250836	0.0877	0.5613	0.156244	0	0	0.055	1	0.00356187	ENSP00000294794	0	0	0	0	0	0
ENSG00000198929.8	ENSG00000198929	NOS1AP	1	162039564	162353321	2	5557	313757	protein_coding	0.693954	1.80414	1.77012	NA	NA	NA	0.02	0.5224	0.0382848	0	0.017	0.212	1	0.000171062	ENSP00000355133	0	0	0	0	0	0
ENSG00000239887.3	ENSG00000239887	C1orf226	1	162336698	162356600	2	4116	19902	protein_coding	0.936483	2.27127	2.73095	0.0029	0.0166	0.174699	0.1176	0.5251	0.223957	NA	0	0.284	NA	0.000274307	NA	0	0	0	0	0	0
ENSG00000171722.7	ENSG00000171722	C1orf111	1	162342993	162346660	3	1708	3667	protein_coding	0.99644	32.6871	166.058	0.0033	0.0122	0.270492	0.0981	0.5858	0.167463	2	NA	NA	NA	0.00590335	NA	0	0	0	0	0	0
ENSG00000198574.4	ENSG00000198574	SH2D1B	1	162365056	162381928	4	2519	16872	protein_coding	0.93728	6.64814	64.008	0.0251	0.0411	0.610706	0.2264	0.3896	0.581109	4	0.004	0	1	0.00104871	ENSP00000356906	0	0	1	1	0	0
ENSG00000152332.11	ENSG00000152332	UHMK1	1	162467041	162499419	8	8470	32378	protein_coding	0.643864	22.7014	50.0594	0.0011	0.0082	0.134146	0.0033	0.3125	0.01056	0	0.123	0	71	0.00132741	ENSP00000420270	0	0	0	0	0	0
ENSG00000117143.9	ENSG00000117143	UAP1	1	162531323	162569627	11	2333	38304	protein_coding	0.583674	66.6713	2164.52	0.0009	0.0095	0.0947368	0.0339	0.4742	0.0714888	0	NA	NA	83	0.0108499	ENSP00000356903	0	0	0	0	0	0
ENSG00000162733.12	ENSG00000162733	DDR2	1	162601163	162757190	19	10141	156027	protein_coding	0.71397	46.5366	276.39	0.0006	0.0035	0.171429	0.0184	0.4478	0.0410898	0	NA	NA	3	0.00205802	ENSP00000356898	1	0	0	0	0	0
ENSG00000132196.9	ENSG00000132196	HSD17B7	1	162760492	162782607	9	2532	22115	protein_coding	0.701785	12.3129	65.3702	0.0014	0.0102	0.137255	0.1418	0.573	0.247469	0	NA	NA	40	0.00193552	ENSP00000254521	0	1	0	0	0	0
ENSG00000185860.9	ENSG00000185860	C1orf110	1	162794248	162838605	5	2600	44357	protein_coding	0.921518	1.13567	2.38308	0.1301	0.2052	0.634016	0.3384	0.5696	0.594101	4	NA	NA	NA	0.000177368	NA	0	0	0	0	0	0
ENSG00000117152.9	ENSG00000117152	RGS4	1	163038565	163046592	3	3771	8027	protein_coding	0.982333	90.94	2329.9	0	0.0182	0	0.0231	0.443	0.0521445	1	0.109	NA	1	0.0116346	ENSP00000397181	0	1	0	0	0	0
ENSG00000143248.8	ENSG00000143248	RGS5	1	163080911	163291577	5	5857	210666	protein_coding	0.933271	751.644	136622	0.0043	0	NA	0.0508	0.3752	0.135394	0	0	0.159	2	0.0679797	ENSP00000319308	0	0	0	0	0	0
ENSG00000143228.8	ENSG00000143228	NUF2	1	163236366	163325554	14	1955	89188	protein_coding	0.951318	21.0245	28.0849	0	0.0354	0	0.1705	0.6071	0.280843	2	0.065	0.026	178	0.00363821	ENSP00000271452	0	0	0	0	0	0
ENSG00000185630.14	ENSG00000185630	PBX1	1	164524821	164868533	3	11318	343712	protein_coding	0.791172	50.2095	311.211	0	0.0072	0	0	0.1999	0	0	NA	NA	71	0.00182594	ENSP00000405890	0	1	0	0	0	0
ENSG00000162761.10	ENSG00000162761	LMX1A	1	165171104	165325952	9	3536	154848	protein_coding	0.957227	2.57485	9.35348	0	0.0154	0	0.0128	0.4822	0.026545	0	0	NA	4	0.000342087	ENSP00000294816	0	1	0	0	0	0
ENSG00000143171.8	ENSG00000143171	RXRG	1	165370159	165414433	10	2026	44274	protein_coding	0.941356	23.9283	118.532	0	0.0135	0	0.0078	0.5218	0.0149483	1	0.031	NA	NA	0.00409191	NA	0	0	0	0	0	0
ENSG00000162763.3	ENSG00000162763	LRRC52	1	165513244	165533198	2	1367	19954	protein_coding	0.997727	17.5651	74.7457	0.0014	0.0087	0.16092	0.1637	0.5082	0.322117	1	0	NA	7	0.0033632	ENSP00000294818	0	0	0	0	0	0
ENSG00000143198.8	ENSG00000143198	MGST3	1	165600098	165631033	1	3100	30935	protein_coding	0.584114	41.2609	190.856	0.007	0.0131	0.534351	0.0876	0.5712	0.153361	0	NA	NA	5	0.0059118	ENSP00000356859	0	0	0	0	0	0
ENSG00000143149.8	ENSG00000143149	ALDH9A1	1	165631453	165668100	11	2685	36647	protein_coding	0.652697	82.7292	557.325	0.0018	0.0101	0.178218	0.0643	0.5901	0.108965	0	0.347	0.184	254	0.0126859	ENSP00000346827	0	0	0	0	0	0
ENSG00000143183.12	ENSG00000143183	TMCO1	1	165696032	165796992	7	2217	100960	protein_coding	0.446905	31.6996	103.147	0	0	NA	0	0.4633	0	0	0	0.004	73	0.00525725	ENSP00000375975	0	0	0	0	0	0
ENSG00000143179.8	ENSG00000143179	UCK2	1	165796768	165880855	3	4666	84087	protein_coding	0.73716	16.5548	23.7175	0	0.0044	0	0.0082	0.6455	0.0127033	0	NA	NA	68	0.0018302	ENSP00000356853	0	0	0	0	0	0
ENSG00000188859.5	ENSG00000188859	FAM78B	1	166026674	166136206	3	4396	109532	protein_coding	0.677771	2.18421	2.52121	0	0.0121	0	0	0.2432	0	0	0.022	0.034	NA	0.000251417	NA	0	0	0	0	0	0
ENSG00000143157.7	ENSG00000143157	POGK	1	166808681	166825581	5	6249	16900	protein_coding	0.376173	10.6078	12.3771	0.0007	0.0133	0.0526316	0.0428	0.5382	0.0795243	0	0	0.054	17	0.000897607	ENSP00000356849	0	0	0	0	0	0
ENSG00000152382.5	ENSG00000152382	TADA1	1	166825747	166845564	4	2535	19817	protein_coding	0.528033	9.16862	10.3722	0	0.0083	0	0.0213	0.4692	0.0453964	0	0.034	0.064	2	0.00144227	ENSP00000356848	0	0	0	0	0	0
ENSG00000143195.8	ENSG00000143195	ILDR2	1	166882443	166944719	10	8115	62276	protein_coding	0.94821	8.74561	4.93858	0	0.0087	0	0.0482	0.4252	0.113358	0	0	0.112	NA	0.000542862	NA	0	0	0	0	0	0
ENSG00000143194.8	ENSG00000143194	MAEL	1	166958346	166991451	12	2343	33105	protein_coding	0.997448	85.7982	382.812	0.0055	0.0081	0.679012	0.0508	0.326	0.155828	2	0.265	NA	17	0.0139336	ENSP00000356846	0	0	0	0	0	0
ENSG00000143167.7	ENSG00000143167	GPA33	1	167022073	167059868	7	2795	37795	protein_coding	0.980987	97.158	6211.79	0.0109	0.0249	0.437751	0.1955	0.829	0.235826	3	0	0.127	5	0.0146392	ENSP00000356842	0	0	0	0	0	0
ENSG00000198842.5	ENSG00000198842	DUSP27	1	167063282	167098402	6	4158	35120	protein_coding	0.956182	39.5632	659.354	0.0074	0.0176	0.420455	0.0887	0.7536	0.117702	0	0	NA	49	0.00475188	ENSP00000271385	0	0	0	0	0	0
ENSG00000143190.17	ENSG00000143190	POU2F1	1	167190066	167396582	18	14314	206516	protein_coding	0.404017	3.92257	1.8496	0.0029	0.0052	0.557692	0.0335	0.284	0.117958	0	NA	NA	NA	8.65e-05	NA	0	1	0	0	0	0
ENSG00000198821.6	ENSG00000198821	CD247	1	167399877	167487847	7	2915	87970	protein_coding	0.960978	31.615	1082.47	0	0.0148	0	0.1725	1.0587	0.162936	1	0	0.117	16	0.00466499	ENSP00000354782	1	1	1	0	0	0
ENSG00000143162.7	ENSG00000143162	CREG1	1	167498914	167523004	4	1970	24090	protein_coding	0.486114	80.7647	707.018	0.0185	0.0311	0.594855	0.1437	0.585	0.245641	0	0.225	0.226	10	0.0139635	ENSP00000359540	0	0	0	0	0	0
ENSG00000198771.6	ENSG00000198771	RCSD1	1	167599330	167675486	7	3128	76156	protein_coding	0.848963	25.3763	153.091	0.0037	0.0091	0.406593	0.2417	0.8747	0.276323	1	0	0.165	NA	0.0036189	NA	0	0	0	0	0	0
ENSG00000197965.7	ENSG00000197965	MPZL1	1	167690429	167761156	6	5004	70727	protein_coding	0.514045	36.8339	100.685	0.0018	0.0087	0.206897	0.0914	0.4395	0.207964	0	0	0.125	NA	0.00383501	NA	0	0	0	0	0	0
ENSG00000143199.13	ENSG00000143199	ADCY10	1	167778625	167883453	33	5022	104828	protein_coding	0.988791	8.18161	6.96449	0.0064	0.0102	0.627451	0.1508	0.5166	0.291909	3	0.003	0.016	1133	0.000849903	ENSP00000356825	0	0	0	0	0	0
ENSG00000143158.6	ENSG00000143158	MPC2	1	167885967	167906278	5	2172	20311	protein_coding	0.749626	70.6416	413.285	0	0.0166	0	0.0425	0.4069	0.104448	NA	0.027	NA	38	0.0117967	ENSP00000271373	0	0	0	0	0	0
ENSG00000143164.11	ENSG00000143164	DCAF6	1	167905021	168045081	22	3327	140060	protein_coding	0.863093	123.08	652.776	0.0014	0.0096	0.145833	0.0538	0.375	0.143467	0	0.015	0.04	28	0.0169527	ENSP00000356814	0	0	0	0	0	0
ENSG00000143147.10	ENSG00000143147	GPR161	1	168053997	168106821	8	2668	52824	protein_coding	0.867001	14.8201	105.494	NA	NA	NA	0.0448	0.5782	0.0774818	0	0.054	0.203	NA	0.00227671	NA	0	0	0	0	0	0
ENSG00000143155.8	ENSG00000143155	TIPRL	1	168148171	168169950	7	1623	21779	protein_coding	0.643857	29.735	21.4467	0	0.0073	0	0.0154	0.4232	0.0363894	0	0.129	0.213	78	0.00543828	ENSP00000356807	0	0	0	0	0	0
ENSG00000213064.5	ENSG00000213064	SFT2D2	1	168195176	168222263	8	11032	27087	protein_coding	0.583917	14.6789	20.7762	0.0033	0	NA	0.0472	0.5569	0.0847549	NA	NA	NA	17	0.000560798	ENSP00000271375	0	0	0	0	0	0
ENSG00000143178.8	ENSG00000143178	TBX19	1	168250278	168283664	8	2814	33386	protein_coding	0.959908	54.5121	1834.17	0.0011	0.0203	0.0541872	0.0401	0.4021	0.0997264	NA	0	0.192	NA	0.00818225	NA	1	0	0	0	0	0
ENSG00000143185.3	ENSG00000143185	XCL2	1	168510003	168513235	3	562	3232	protein_coding	0.936792	7.58756	207.929	0.0119	0	NA	0.2886	0.5651	0.510706	9	0	0.499	2	0.00165869	ENSP00000356793	0	0	1	0	0	0
ENSG00000143184.4	ENSG00000143184	XCL1	1	168545711	168551315	3	1364	5604	protein_coding	0.885799	2.50964	32.6083	0.0042	0.0316	0.132911	0.2754	0.5931	0.46434	4	0	0.607	4	0.000479878	ENSP00000356792	0	0	1	1	0	0
ENSG00000143196.4	ENSG00000143196	DPT	1	168664697	168698502	4	1782	33805	protein_coding	0.809175	331.545	57539.6	0	0.0109	0	0.0358	0.6359	0.0562982	0	0.108	NA	16	0.0592013	ENSP00000356791	0	0	0	0	0	0
ENSG00000143153.8	ENSG00000143153	ATP1B1	1	169074935	169101960	7	2601	27025	protein_coding	0.826976	137.89	9838.37	0.0015	0.0312	0.0480769	0.0306	0.5283	0.0579216	0	NA	NA	8	0.0214673	ENSP00000356789	0	0	0	0	0	0
ENSG00000143156.9	ENSG00000143156	NME7	1	169101769	169337205	7	4291	235436	protein_coding	0.568788	10.6546	9.75676	0.0013	0.0065	0.2	0.0666	0.6199	0.107437	0	0.174	0.159	294	0.00125581	ENSP00000356785	0	0	0	0	0	0
ENSG00000117475.9	ENSG00000117475	BLZF1	1	169337208	169365778	7	2742	28570	protein_coding	0.58274	12.2353	19.3855	0.0034	0.0031	1.09677	0.092	0.5729	0.160586	0	0.028	0.076	11	0.00185374	ENSP00000327541	0	0	0	0	0	0
ENSG00000117477.8	ENSG00000117477	CCDC181	1	169364108	169429907	7	2028	65799	protein_coding	0.943117	22.6326	37.5418	0.0027	0.0045	0.6	0.1498	0.8336	0.179702	1	0	NA	NA	0.00386804	NA	0	0	0	0	0	0
ENSG00000117479.8	ENSG00000117479	SLC19A2	1	169433147	169455241	6	3665	22094	protein_coding	0.796151	50.8867	973.183	0	0.011	0	0.0545	0.5295	0.102927	0	NA	NA	1	0.00663103	ENSP00000236137	1	0	0	0	0	0
ENSG00000198734.6	ENSG00000198734	F5	1	169483404	169555826	25	7014	72422	protein_coding	0.963893	27.7447	258.702	0.0051	0.0159	0.320755	0.186	0.5847	0.318112	0	0.068	0.281	3	0.00206478	ENSP00000356771	1	1	0	0	0	0
ENSG00000174175.12	ENSG00000174175	SELP	1	169558087	169599431	17	3125	41344	protein_coding	0.63897	9.77606	57.2287	0.0093	0.0196	0.47449	0.1692	0.6514	0.259748	NA	0	0.108	NA	0.00139412	NA	0	0	0	0	0	0
ENSG00000000460.12	ENSG00000000460	C1orf112	1	169631245	169823221	24	4331	191976	protein_coding	0.800122	4.70016	1.66931	0.0039	0.0152	0.256579	0.1668	0.4074	0.409426	0	0.097	0.281	2	0.000547952	ENSP00000286031	0	0	0	0	0	0
ENSG00000188404.4	ENSG00000188404	SELL	1	169659808	169680839	9	2427	21031	protein_coding	0.993257	792.227	264541	0.0014	0.0136	0.102941	0.1531	0.6334	0.241711	0	0.036	0.605	24	0.12683	ENSP00000236147	0	0	1	0	0	0
ENSG00000007908.11	ENSG00000007908	SELE	1	169691781	169733846	14	3843	42065	protein_coding	0.890632	31.8781	1604.07	0.0038	0.0147	0.258503	0.179	0.642	0.278816	0	NA	NA	1	0.00403429	ENSP00000331736	0	0	0	0	0	0
ENSG00000171806.7	ENSG00000171806	METTL18	1	169761670	169764107	2	1519	2437	protein_coding	0.553707	7.14026	10.5903	0.0013	0.0058	0.224138	0.1918	0.6826	0.280984	0	0.171	NA	41	0.00133025	ENSP00000307077	0	0	0	0	0	0
ENSG00000000457.9	ENSG00000000457	SCYL3	1	169818772	169863408	13	6351	44636	protein_coding	0.483159	8.32729	6.24595	0.0071	0.0111	0.63964	0.1152	0.506	0.227668	0	NA	NA	11	0.000693491	ENSP00000356744	0	0	0	0	0	0
ENSG00000075945.8	ENSG00000075945	KIFAP3	1	169890467	170054349	20	4091	163882	protein_coding	0.728317	28.2275	166.855	0	0.0134	0	0.0201	0.6153	0.032667	0	0.17	0.011	NA	0.00342192	NA	0	1	0	0	0	0
ENSG00000203740.3	ENSG00000203740	METTL11B	1	170115142	170136931	4	988	21789	protein_coding	0.963725	0.612704	0.167654	0.0032	0	NA	0.0308	0.3567	0.0863471	0	NA	NA	2	0.000124779	ENSP00000408058	0	0	0	0	0	0
ENSG00000120370.8	ENSG00000120370	GORAB	1	170501270	170522587	7	2460	21317	protein_coding	0.391568	6.03863	3.79632	0.0073	0.0114	0.640351	0.1633	0.5951	0.274408	0	0.053	0.211	1	0.000961929	ENSP00000356737	1	0	0	0	0	0
ENSG00000116132.7	ENSG00000116132	PRRX1	1	170631869	170708560	4	4280	76691	protein_coding	0.728269	37.4794	298.085	0	0	NA	0.0018	0.2899	0.00620904	0	0.07	NA	4	0.00440929	ENSP00000239461	1	1	0	0	0	0
ENSG00000117501.10	ENSG00000117501	MROH9	1	170904612	171033906	22	3143	129294	protein_coding	0.98812	1.50504	0.432192	0.0545	0.0516	1.0562	0.3192	0.616	0.518182	3	NA	NA	NA	0.000214602	NA	0	0	0	0	0	0
ENSG00000007933.8	ENSG00000007933	FMO3	1	171060018	171086959	9	2078	26941	protein_coding	0.980171	102.691	4471.68	0.0025	0.0186	0.134409	0.1174	0.4995	0.235035	1	0.156	NA	1	0.0174824	ENSP00000356729	1	0	0	0	0	0
ENSG00000117507.4	ENSG00000117507	FMO6P	1	171106879	171130707	7	2123	23828	protein_coding	0.943704	1.7199	2.96456	0.0094	0.0227	0.414097	0.0826	0.554	0.149097	0	NA	NA	1	0.000289757	ENSP00000236166	0	0	0	0	0	0
ENSG00000094963.9	ENSG00000094963	FMO2	1	171154347	171181822	10	5171	27475	protein_coding	0.834202	65.5471	1663.75	0.0021	0.0165	0.127273	0.0751	0.7393	0.101583	0	0.152	NA	1	0.00663849	ENSP00000209929	0	0	0	0	0	0
ENSG00000010932.11	ENSG00000010932	FMO1	1	171217638	171255117	9	3121	37479	protein_coding	0.912153	14.2245	309.301	0.0038	0.008	0.475	0.0987	0.4373	0.225703	0	0.011	NA	1	0.00202552	ENSP00000346901	0	0	0	0	0	0
ENSG00000076258.5	ENSG00000076258	FMO4	1	171283347	171311223	10	2242	27876	protein_coding	0.755773	9.34673	26.3847	0.0027	0.0099	0.272727	0.1204	0.4699	0.256225	0	0.056	0.028	NA	0.00154419	NA	0	0	0	0	0	0
ENSG00000117523.11	ENSG00000117523	PRRC2C	1	171454651	171562650	34	10332	107999	protein_coding	0.59779	40.8857	56.3304	0.0021	0.0077	0.272727	0.0695	0.4813	0.144401	0	0.019	0	29	0.00175345	ENSP00000343629	0	0	0	0	0	0
ENSG00000034971.10	ENSG00000034971	MYOC	1	171604557	171621823	3	2092	17266	protein_coding	0.901822	158.23	21964.6	0.0065	0.025	0.26	0.1035	0.6551	0.157991	0	NA	NA	2	0.0267551	ENSP00000037502	0	0	0	0	0	0
ENSG00000117533.10	ENSG00000117533	VAMP4	1	171669300	171711387	8	5151	42087	protein_coding	0.489292	13.2929	13.1142	0	0	NA	0.0377	0.4314	0.0873899	1	0	0.141	17	0.00135247	ENSP00000236192	0	0	0	0	0	0
ENSG00000010165.15	ENSG00000010165	METTL13	1	171750788	171783163	8	3319	32375	protein_coding	0.514342	14.5525	36.9052	0.0021	0.0097	0.216495	0.0545	0.4893	0.111384	0	NA	NA	6	0.00201496	ENSP00000354920	0	0	0	0	0	0
ENSG00000197959.9	ENSG00000197959	DNM3	1	171810621	172387606	21	7622	576985	protein_coding	0.936437	12.603	64.6214	0.0024	0.0194	0.123711	0.0099	0.5111	0.01937	0	0.037	0.052	498	0.000848682	ENSP00000350876	0	0	0	0	0	0
ENSG00000135845.5	ENSG00000135845	PIGC	1	172339329	172413230	1	2629	73901	protein_coding	0.502826	8.94038	5.88338	0.0052	0.0174	0.298851	0.0347	0.6022	0.0576221	0	NA	NA	17	0.00138423	ENSP00000258324	0	0	0	0	0	0
ENSG00000180999.6	ENSG00000180999	C1orf105	1	172389828	172437971	7	978	48143	protein_coding	0.983152	15.6173	37.9736	0.0103	0.0131	0.78626	0.3037	0.6118	0.496404	4	0.026	0.55	NA	0.00318074	NA	0	0	0	0	0	0
ENSG00000094975.9	ENSG00000094975	SUCO	1	172501489	172580971	23	5891	79482	protein_coding	0.592779	15.077	22.9156	0.0037	0.0054	0.685185	0.0694	0.4025	0.172422	0	NA	NA	16	0.0013573	ENSP00000263688	0	0	0	0	0	0
ENSG00000117560.6	ENSG00000117560	FASLG	1	172628154	172636014	4	1884	7860	protein_coding	0.941539	3.02092	6.51202	0.0019	0.0034	0.558824	0.1245	0.3915	0.318008	1	0	0.039	NA	0.000529439	NA	0	0	1	0	0	0
ENSG00000120337.7	ENSG00000120337	TNFSF18	1	173009100	173020103	3	2005	11003	protein_coding	0.866862	0.469194	2.63809	0	0	NA	0.3703	0.8023	0.461548	3	NA	NA	NA	8.06e-05	NA	0	0	1	1	0	0
ENSG00000117586.6	ENSG00000117586	TNFSF4	1	173152873	173176452	3	3467	23579	protein_coding	0.888474	6.6685	34.4999	0.003	0.0048	0.625	0.4358	0.4729	0.921548	3	0.112	0.163	NA	0.0008981	NA	0	0	1	1	0	0
ENSG00000117592.8	ENSG00000117592	PRDX6	1	173446405	173457946	5	1746	11541	protein_coding	0.530482	218.084	11642	0	0.0088	0	0.0666	0.3975	0.167547	0	0	0.296	438	0.0391072	ENSP00000342026	0	0	0	0	0	0
ENSG00000162753.10	ENSG00000162753	SLC9C2	1	173469603	173572233	28	4400	102630	protein_coding	0.989128	4.26058	1.02501	0.0036	0.0076	0.473684	NA	NA	NA	2	NA	NA	181	0.000490974	ENSP00000356687	0	0	0	0	0	0
ENSG00000183831.6	ENSG00000183831	ANKRD45	1	173578700	173639001	2	1822	60301	protein_coding	0.975147	13.069	14.4997	0.0019	0.0037	0.513514	0.1376	0.4759	0.289136	0	0.035	NA	457	0.00232043	ENSP00000331268	0	0	0	0	0	0
ENSG00000076321.6	ENSG00000076321	KLHL20	1	173684080	173755840	12	3409	71760	protein_coding	0.424832	9.28206	8.88838	0	0.0066	0	0.0003	0.3488	0.000860092	0	0.003	0.041	98	0.00126167	ENSP00000209884	0	0	0	0	0	0
ENSG00000120334.11	ENSG00000120334	CENPL	1	173768688	173793858	2	2471	25170	protein_coding	0.806683	3.55554	0.745104	0.006	0.0063	0.952381	0.0835	0.4072	0.205059	0	0.049	0.035	49	0.000565926	ENSP00000348527	0	0	0	0	0	0
ENSG00000117593.8	ENSG00000117593	DARS2	1	173793641	173827684	17	3489	34043	protein_coding	0.792243	19.7554	29.5627	0.0036	0.0115	0.313043	0.082	0.499	0.164329	0	0.184	0.041	138	0.00265626	ENSP00000355086	1	0	0	0	0	0
ENSG00000185278.10	ENSG00000185278	ZBTB37	1	173837220	173872687	4	19124	35467	protein_coding	0.562901	3.83552	2.0203	0	0.0058	0	0.0231	0.3142	0.0735201	0	NA	NA	320	3.8e-05	ENSP00000356674	0	0	0	0	0	0
ENSG00000117601.9	ENSG00000117601	SERPINC1	1	173872947	173886516	7	1587	13569	protein_coding	0.999751	744.916	115917	0.002	0.0166	0.120482	0.0667	0.5837	0.114271	0	0.087	0.191	109	0.137236	ENSP00000356671	1	1	1	0	0	0
ENSG00000135870.7	ENSG00000135870	RC3H1	1	173900352	173991435	20	11241	91083	protein_coding	0.362078	6.02312	7.58963	0.0004	0.0063	0.0634921	0.0334	0.3286	0.101643	0	0	0	1	0.000221796	ENSP00000258349	0	0	1	1	0	0
ENSG00000152061.17	ENSG00000152061	RABGAP1L	1	174128548	174964445	9	6812	835897	protein_coding	0.744184	12.2219	23.2242	0.0023	0.0049	0.469388	0.032	0.3959	0.0808285	0	0.009	0.082	14	0.000940543	ENSP00000251507	0	0	0	0	0	0
ENSG00000203737.2	ENSG00000203737	GPR52	1	174417212	174418683	1	1471	1471	protein_coding	0.895594	0.668786	13.9755	NA	NA	NA	NA	NA	NA	0	0	NA	1	0.000125642	ENSP00000356658	0	0	0	0	0	0
ENSG00000116161.13	ENSG00000116161	CACYBP	1	174968300	174980851	6	2828	12551	protein_coding	0.698668	35.0114	287.804	0	0	NA	0.0396	0.4906	0.0807175	0	0	0.036	180	0.00524241	ENSP00000356652	0	0	0	0	0	0
ENSG00000120333.4	ENSG00000120333	MRPS14	1	174979925	174992561	3	2112	12636	protein_coding	0.29552	15.1342	16.2044	0	0.0171	0	0.0733	0.4118	0.177999	0	0.078	0.015	406	0.00254846	ENSP00000420714	0	0	0	0	0	0
ENSG00000120332.11	ENSG00000120332	TNN	1	175036994	175117202	19	4989	80208	protein_coding	0.90062	4.22423	13.8833	0.0079	0.0239	0.330544	0.1071	0.7206	0.148626	0	0	NA	4	0.000440877	ENSP00000239462	0	0	0	0	0	0
ENSG00000235750.5	ENSG00000235750	KIAA0040	1	175126123	175162135	4	4560	36012	protein_coding	0.667324	30.0725	556.536	NA	NA	NA	0.1558	0.5212	0.298926	NA	0.11	NA	NA	0.00337778	NA	0	0	0	0	0	0
ENSG00000116147.12	ENSG00000116147	TNR	1	175284330	175712906	23	12926	428576	protein_coding	0.99197	14.9366	64.5886	0.0017	0.016	0.10625	0.0334	0.5191	0.0643421	0	NA	NA	NA	0.000414523	NA	0	0	0	0	0	0
ENSG00000143207.15	ENSG00000143207	RFWD2	1	175913967	176176629	20	3013	262662	protein_coding	0.510797	19.6317	97.2787	0	0.0181	0	0.0106	0.3198	0.0331457	0	0.003	0.027	48	0.00284659	ENSP00000356641	0	0	0	0	0	0
ENSG00000116183.6	ENSG00000116183	PAPPA2	1	176432307	176814735	23	9662	382428	protein_coding	0.898908	3.90008	30.6762	0.0033	0.0062	0.532258	0.128	0.4951	0.258534	0	0	NA	NA	0.000186957	NA	0	0	0	0	0	0
ENSG00000152092.11	ENSG00000152092	ASTN1	1	176826438	177134109	23	7314	307671	protein_coding	0.961338	16.9648	39.8777	0.001	0.0116	0.0862069	0.0096	0.4461	0.0215198	0	NA	NA	1	0.00120538	ENSP00000354536	0	0	0	0	0	0
ENSG00000198797.6	ENSG00000198797	BRINP2	1	177140633	177251558	8	3550	110925	protein_coding	0.972738	17.883	29.0318	0.0012	0.0105	0.114286	0.0277	0.4282	0.0646894	NA	0	NA	44	0.00237707	ENSP00000354481	0	0	0	0	0	0
ENSG00000120341.14	ENSG00000120341	SEC16B	1	177893091	177953438	26	3959	60347	protein_coding	0.827265	15.6475	24.6736	NA	NA	NA	0.171	0.5077	0.336813	NA	NA	NA	2	0.00193509	ENSP00000308339	0	0	0	0	0	0
ENSG00000075391.12	ENSG00000075391	RASAL2	1	178062864	178448644	18	10880	385780	protein_coding	0.568061	10.7856	11.4381	0.0012	0.0103	0.116505	0.0143	0.2745	0.0520947	0	0	0.052	18	0.000422588	ENSP00000356621	0	0	0	0	0	0
ENSG00000240021.5	ENSG00000240021	TEX35	1	178482212	178517734	4	2448	35522	protein_coding	0.999252	28.9661	121.426	0.0098	0.0166	0.590361	0.3175	0.5737	0.553425	NA	0.031	NA	NA	0.00462778	NA	0	0	0	0	0	0
ENSG00000213057.4	ENSG00000213057	C1orf220	1	178511887	178518024	3	2592	6137	protein_coding	0.719101	0.958614	0.677397	NA	NA	NA	NA	NA	NA	5	0.028	0.19	NA	0.000149406	NA	0	0	0	0	0	0
ENSG00000116191.13	ENSG00000116191	RALGPS2	1	178694300	178889238	20	5814	194938	protein_coding	0.839841	22.7004	59.7084	0.0016	0.0041	0.390244	0.0112	0.5715	0.0195975	0	NA	NA	NA	0.00206681	NA	0	0	0	0	0	0
ENSG00000116194.8	ENSG00000116194	ANGPTL1	1	178818840	178840187	6	3342	21347	protein_coding	0.716112	40.7109	558.639	0.0027	0.0171	0.157895	0.0336	0.4807	0.0698981	0	0.088	0	NA	0.00559555	NA	0	0	0	0	0	0
ENSG00000116199.7	ENSG00000116199	FAM20B	1	178994939	179045697	8	5976	50758	protein_coding	0.456437	19.683	28.1855	0.0047	0.0056	0.839286	0.0131	0.3758	0.034859	0	0.11	0.023	NA	0.00174587	NA	0	0	0	0	0	0
ENSG00000186283.9	ENSG00000186283	TOR3A	1	179050512	179067158	6	2718	16646	protein_coding	0.633613	21.7672	29.166	0.0044	0.0037	1.18919	0.1897	0.7843	0.241872	0	0.054	0.259	9	0.0033257	ENSP00000356599	0	0	0	0	0	0
ENSG00000143322.15	ENSG00000143322	ABL2	1	179068462	179198819	12	12132	130357	protein_coding	0.736587	10.3039	12.7253	0.0014	0.008	0.175	0.0272	0.3294	0.0825744	0	0.078	0.346	822	0.000327104	ENSP00000427562	0	0	1	0	0	0
ENSG00000057252.8	ENSG00000057252	SOAT1	1	179262925	179327815	16	6819	64890	protein_coding	0.921639	65.424	444.262	0	0.0017	0	0.0769	0.6272	0.122608	0	0.036	0.212	143	0.00503605	ENSP00000356591	0	0	0	0	0	0
ENSG00000162779.16	ENSG00000162779	AXDND1	1	179334855	179523870	26	3616	189015	protein_coding	0.991674	9.73267	8.83385	0.0045	0.0102	0.441176	0.2423	0.5575	0.434619	NA	0.03	NA	NA	0.00127798	NA	0	0	0	0	0	0
ENSG00000269064.1	ENSG00000269064	AL160286.1	1	179443716	179457805	2	127	14089	protein_coding	NA	0	0	NA	NA	NA	NA	NA	NA	NA	NA	NA	NA	0	NA	0	0	0	0	0	0
ENSG00000116218.8	ENSG00000116218	NPHS2	1	179519674	179545087	8	1847	25413	protein_coding	0.999438	53.9909	1919.48	0.0064	0.0178	0.359551	0.077	0.4685	0.164354	0	0	NA	57	0.00952536	ENSP00000356587	0	1	0	0	0	0
ENSG00000162782.11	ENSG00000162782	TDRD5	1	179560748	179660407	18	3660	99659	protein_coding	0.982772	12.5024	10.1224	0.0045	0.0129	0.348837	0.1213	0.4914	0.246846	1	0.07	NA	36	0.0016298	ENSP00000406052	0	0	0	0	0	0
ENSG00000143340.6	ENSG00000143340	FAM163A	1	179712298	179785333	5	2904	73035	protein_coding	0.980391	29.328	199.473	0.0275	0.0003	91.6667	0.0802	0.3087	0.259799	0	0.076	NA	NA	0.00433339	NA	0	0	0	0	0	0
ENSG00000169905.8	ENSG00000169905	TOR1AIP2	1	179809102	179846938	6	7899	37836	protein_coding	0.514372	4.90978	5.90216	0.0032	0.0022	1.45455	0.2122	0.6007	0.353255	0	NA	NA	3	0.000315792	ENSP00000356584	0	0	0	0	0	0
ENSG00000143337.14	ENSG00000143337	TOR1AIP1	1	179851177	179894135	10	8694	42958	protein_coding	0.404035	14.6866	25.4977	0.0017	0.0108	0.157407	0.198	0.5828	0.339739	0	NA	NA	1	0.000828092	ENSP00000393292	0	1	0	0	0	0
ENSG00000135837.11	ENSG00000135837	CEP350	1	179923873	180084015	38	13453	160142	protein_coding	0.713898	15.1337	17.2135	0.0026	0.0076	0.342105	0.1073	0.5119	0.209611	0	0	0.033	NA	0.000384755	NA	0	0	0	0	0	0
ENSG00000116260.12	ENSG00000116260	QSOX1	1	180123969	180173165	12	9299	49196	protein_coding	0.575141	48.8797	378.053	0.0154	0.01	1.54	0.1833	0.6924	0.264731	0	0.063	0.562	6	0.00249039	ENSP00000356574	0	0	0	0	0	0
ENSG00000121454.4	ENSG00000121454	LHX4	1	180199421	180249380	6	7077	49959	protein_coding	0.884396	4.08848	1.94289	0	0.016	0	0.0045	0.3638	0.0123694	0	0.013	0.158	NA	0.000301687	NA	0	1	0	0	0	0
ENSG00000135847.5	ENSG00000135847	ACBD6	1	180244515	180472089	8	1662	227574	protein_coding	0.6267	26.4072	22.0793	NA	NA	NA	0.0796	0.3944	0.201826	NA	0.015	0.028	16	0.0048027	ENSP00000356567	0	0	0	0	0	0
ENSG00000143324.9	ENSG00000143324	XPR1	1	180601140	180859387	15	8459	258247	protein_coding	0.639973	10.0913	35.2717	0	0.0081	0	0.0243	0.2684	0.0905365	0	0.04	0	NA	0.000591693	NA	0	0	0	0	0	0
ENSG00000135835.6	ENSG00000135835	KIAA1614	1	180882290	180920750	9	9645	38460	protein_coding	0.525521	3.07919	4.45556	0.0242	0.036	0.672222	0.3357	0.831	0.403971	NA	0	0.013	NA	0.000148067	NA	0	0	0	0	0	0
ENSG00000234237.2	ENSG00000234237	AL162431.1	1	180941695	180949868	2	166	8173	protein_coding	0.601895	0.124289	0.0412662	NA	NA	NA	NA	NA	NA	NA	NA	NA	NA	2.89e-05	NA	0	0	0	0	0	0
ENSG00000135823.9	ENSG00000135823	STX6	1	180941861	180992047	8	4843	50186	protein_coding	0.451687	10.8202	12.3806	0	0.0037	0	0.0304	0.3321	0.0915387	0	0	0.184	1	0.00115611	ENSP00000258301	0	0	0	0	0	0
ENSG00000153029.10	ENSG00000153029	MR1	1	181003067	181031074	6	7698	28007	protein_coding	0.688076	10.8435	11.8704	0.0047	0.0055	0.854545	0.1427	0.4708	0.303101	4	0	0.022	1	0.000718283	ENSP00000356552	1	0	1	0	0	0
ENSG00000162783.8	ENSG00000162783	IER5	1	181057638	181059977	1	2339	2339	protein_coding	0.7433	63.3	663.846	0.0027	0.0546	0.0494505	0.1178	0.6663	0.176797	0	0.01	0.124	2	0.0102866	ENSP00000356549	0	0	0	0	0	0
ENSG00000198216.6	ENSG00000198216	CACNA1E	1	181382238	181777219	46	16124	394981	protein_coding	0.970083	5.23271	47.6378	0.0018	0.0167	0.107784	0.0179	0.5096	0.0351256	0	0	0.049	NA	8.54e-05	NA	0	0	0	0	0	0
ENSG00000179930.5	ENSG00000179930	ZNF648	1	182023705	182030847	2	3647	7142	protein_coding	0.941629	0.569649	0.0352975	0.0074	0.006	1.23333	0.1938	0.9854	0.196671	5	NA	NA	323	7.45e-05	ENSP00000344129	0	0	0	0	0	0
ENSG00000135821.12	ENSG00000135821	GLUL	1	182350839	182361341	2	6130	10502	protein_coding	0.71066	475.539	123247	0	0.019	0	0.0267	0.4769	0.0559866	0	NA	NA	214	0.0411153	ENSP00000307900	1	1	0	0	0	0
ENSG00000203730.2	ENSG00000203730	TEDDM1	1	182367252	182369751	1	2499	2499	protein_coding	0.915635	0.542205	0.0546735	0.0196	0.0217	0.903226	0.1939	0.4062	0.477351	4	NA	0.044	NA	8.58e-05	NA	0	0	0	0	0	0
ENSG00000121446.13	ENSG00000121446	RGSL1	1	182419256	182529734	12	5660	110478	protein_coding	0.999498	7.42065	7.4567	NA	NA	NA	0.2228	0.647	0.344359	2	NA	NA	NA	0.000693152	NA	0	0	0	0	0	0
ENSG00000135828.7	ENSG00000135828	RNASEL	1	182542769	182558391	7	4231	15622	protein_coding	0.443681	4.99751	13.4015	0.013	0.0124	1.04839	0.2719	0.6855	0.396645	2	0.32	0.214	857	0.000592727	ENSP00000356530	0	0	1	0	0	0
ENSG00000143333.6	ENSG00000143333	RGS16	1	182567758	182573543	5	2422	5785	protein_coding	0.85054	48.5839	3296.32	0.0045	0.0135	0.333333	0.0747	0.6035	0.123778	NA	0	0.037	1	0.00778921	ENSP00000356529	0	0	0	0	0	0
ENSG00000135824.8	ENSG00000135824	RGS8	1	182615239	182653711	7	1425	38472	protein_coding	0.956502	1.30596	15.7813	0.0324	0.0734	0.441417	0.0366	0.6524	0.0561006	0	0	NA	1	0.00024792	ENSP00000258302	0	0	0	0	0	0
ENSG00000135838.9	ENSG00000135838	NPL	1	182758428	182799519	11	2407	41091	protein_coding	0.879181	21.4343	144.989	0.0017	0.0058	0.293103	0.083	0.4454	0.186349	2	0.02	0.012	133	0.0034384	ENSP00000258317	0	0	0	0	0	0
ENSG00000135829.12	ENSG00000135829	DHX9	1	182808504	182856886	28	4212	48382	protein_coding	0.472224	44.7964	103.188	0	0.011	0	0.0407	0.485	0.0839175	0	0	0.003	286	0.00532768	ENSP00000356520	0	1	0	0	0	0
ENSG00000157060.10	ENSG00000157060	SHCBP1L	1	182869000	182922660	9	2531	53660	protein_coding	0.999859	91.0405	622.209	0.0056	0.0081	0.691358	0.1088	0.8053	0.135105	2	NA	NA	22	0.0143221	ENSP00000356518	0	0	0	0	0	0
ENSG00000135862.5	ENSG00000135862	LAMC1	1	182992595	183114727	28	7861	122132	protein_coding	0.799285	185.006	5517.86	0.0032	0.016	0.2	0.0364	0.591	0.0615905	0	0.019	0.161	14	0.0119741	ENSP00000258341	0	1	0	0	0	0
ENSG00000058085.10	ENSG00000058085	LAMC2	1	183155373	183214035	23	5124	58662	protein_coding	0.723714	11.394	70.4329	0.0049	0.0074	0.662162	0.0857	0.4701	0.182302	0	0.037	NA	1	0.00116449	ENSP00000264144	0	1	0	0	0	0
ENSG00000157064.6	ENSG00000157064	NMNAT2	1	183217372	183387737	11	5652	170365	protein_coding	0.946755	29.1865	220.116	0	0.0041	0	0.0058	0.42	0.0138095	0	0.068	0.021	28	0.00273141	ENSP00000287713	0	0	0	0	0	0
ENSG00000116698.16	ENSG00000116698	SMG7	1	183441351	183567381	24	5946	126030	protein_coding	0.6681	35.5574	21.46	0.0162	0.0277	0.584838	0.0384	0.218	0.176147	0	0.097	0.222	NA	0.00317079	NA	0	0	0	0	0	0
ENSG00000116701.10	ENSG00000116701	NCF2	1	183524698	183560011	14	2262	35313	protein_coding	0.982937	355.344	32987	0.0069	0.0076	0.907895	0.0827	0.6474	0.127742	0	0.073	0.037	13	0.0584345	ENSP00000356505	1	0	1	0	0	0
ENSG00000162704.11	ENSG00000162704	ARPC5	1	183592401	183604892	1	2984	12491	protein_coding	0.706024	130.164	7204.89	0	0	NA	0.006	0.4229	0.0141878	0	0.112	0.182	43	0.0189719	ENSP00000352918	0	0	1	0	0	0
ENSG00000143344.11	ENSG00000143344	RGL1	1	183605220	183897665	19	5081	292445	protein_coding	0.692531	27.4087	101.013	0.0005	0.0061	0.0819672	0.0293	0.475	0.0616842	0	NA	NA	1	0.002819	ENSP00000303192	0	0	0	0	0	0
ENSG00000173627.6	ENSG00000173627	APOBEC4	1	183615541	183622451	2	2646	6910	protein_coding	0.992537	8.29165	17.0137	0.0076	0.0103	0.737864	0.2648	0.5324	0.49737	1	0.003	NA	NA	0.00127995	NA	0	0	0	0	0	0
ENSG00000198756.6	ENSG00000198756	COLGALT2	1	183898796	184006863	12	5165	108067	protein_coding	0.843151	6.63442	18.5222	0.0007	0.0078	0.0897436	0.0381	0.4891	0.0778982	0	0.03	NA	NA	0.00067263	NA	0	0	0	0	0	0
ENSG00000198860.7	ENSG00000198860	TSEN15	1	184020811	184043346	5	1955	22535	protein_coding	0.448353	17.1521	45.1857	0.0026	0.0245	0.106122	0.0393	0.4614	0.0851756	2	0	0.186	NA	0.00297987	NA	0	0	0	0	0	0
ENSG00000116667.8	ENSG00000116667	C1orf21	1	184356192	184598154	6	10259	241962	protein_coding	0.615616	22.3297	59.5801	0	0.0079	0	0.0193	0.2275	0.0848352	NA	NA	NA	NA	0.000967741	NA	0	0	0	0	0	0
ENSG00000116406.14	ENSG00000116406	EDEM3	1	184659365	184724047	20	6878	64682	protein_coding	0.405419	11.4316	31.0056	0.0019	0.0061	0.311475	0.0299	0.4691	0.0637391	0	0.029	0.05	NA	0.000869251	NA	0	0	0	0	0	0
ENSG00000135842.12	ENSG00000135842	FAM129A	1	184759858	184943682	14	6914	183824	protein_coding	0.769411	86.8408	5416.32	0.0054	0.0089	0.606742	0.1613	0.5533	0.291524	NA	0	0.007	NA	0.00657891	NA	0	0	0	0	0	0
ENSG00000121481.6	ENSG00000121481	RNF2	1	185014496	185071740	7	3599	57244	protein_coding	0.534352	6.82561	2.78693	0	0.0031	0	0.0013	0.431	0.00301624	0	0.038	0.001	23	0.000899627	ENSP00000356480	0	1	0	0	0	0
ENSG00000121486.7	ENSG00000121486	TRMT1L	1	185087220	185126204	16	4454	38984	protein_coding	0.759174	17.1388	6.6317	0.0024	0.0056	0.428571	0.0619	0.4601	0.134536	0	0.02	NA	438	0.00195315	ENSP00000356476	0	0	0	0	0	0
ENSG00000116668.8	ENSG00000116668	SWT1	1	185126212	185260897	19	3811	134685	protein_coding	0.901533	19.8977	26.4742	0.0039	0.0066	0.590909	0.1679	0.3849	0.436217	NA	0	NA	NA	0.00253015	NA	0	0	0	0	0	0
ENSG00000116679.11	ENSG00000116679	IVNS1ABP	1	185265520	185286461	15	4184	20941	protein_coding	0.601728	55.0234	1587.33	0.0014	0.0041	0.341463	0.0133	0.2905	0.0457831	0	0	0.083	20	0.00657128	ENSP00000356468	0	1	0	0	0	0
ENSG00000143341.7	ENSG00000143341	HMCN1	1	185703683	186160085	107	18101	456402	protein_coding	0.906506	13.733	38.4937	0.0034	0.0089	0.382022	0.0683	0.4889	0.139701	0	0	NA	34	0.000160846	ENSP00000271588	0	0	0	0	0	0
ENSG00000116690.7	ENSG00000116690	PRG4	1	186265405	186283694	13	5031	18289	protein_coding	0.901496	62.6931	8436.96	NA	NA	NA	0.2309	0.5659	0.408023	0	0.028	0.007	NA	0.00650477	NA	1	0	1	0	0	0
ENSG00000047410.9	ENSG00000047410	TPR	1	186280784	186344825	51	9657	64041	protein_coding	0.600034	41.1063	41.8731	0.0012	0.0104	0.115385	0.0292	0.604	0.0483444	0	NA	NA	139	0.00197188	ENSP00000356448	0	0	0	0	0	0
ENSG00000157181.10	ENSG00000157181	C1orf27	1	186344890	186390510	13	3810	45620	protein_coding	0.406054	11.1593	7.60182	0.0021	0	NA	0.077	0.3845	0.20026	2	0.165	0.034	2	0.00142424	ENSP00000287859	0	0	0	0	0	0
ENSG00000268662.1	ENSG00000268662	AL596220.1	1	186364123	186365908	3	132	1785	protein_coding	NA	0	0	NA	NA	NA	NA	NA	NA	NA	NA	NA	NA	0	NA	0	0	0	0	0	0
ENSG00000262180.1	ENSG00000262180	OCLM	1	186369704	186370587	1	883	883	protein_coding	0.423333	1.21378	0.306825	NA	NA	NA	NA	NA	NA	NA	0.01	NA	NA	0.00025065	NA	0	0	0	0	0	0
ENSG00000116703.12	ENSG00000116703	PDC	1	186412698	186430254	4	1238	17556	protein_coding	0.710953	0.176714	0.0247425	0.0036	0.011	0.327273	0.0557	0.6652	0.0837342	0	NA	NA	32	3.46e-05	ENSP00000342033	0	0	0	0	0	0
ENSG00000073756.7	ENSG00000073756	PTGS2	1	186640923	186649559	10	4504	8636	protein_coding	0.85646	23.4308	2302.04	0.0016	0.0107	0.149533	0.0799	0.5823	0.137214	0	0	0.047	11	0.00265054	ENSP00000356438	0	1	0	0	0	0
ENSG00000116711.8	ENSG00000116711	PLA2G4A	1	186798085	186958113	18	2857	160028	protein_coding	0.761929	16.2381	35.4575	0.0007	0.01	0.07	0.0269	0.5918	0.0454545	0	0	0.081	18	0.00241478	ENSP00000356436	0	0	0	0	0	0
ENSG00000162670.8	ENSG00000162670	BRINP3	1	190066792	190446759	8	2881	379967	protein_coding	0.918483	5.232	10.2372	0.0006	0.0164	0.0365854	0.01	0.4237	0.0236016	0	NA	NA	1	0.000776474	ENSP00000356432	0	0	0	0	0	0
ENSG00000150681.5	ENSG00000150681	RGS18	1	192127587	192154945	5	2145	27358	protein_coding	0.970449	21.4236	525.311	0.0037	0.0129	0.286822	0.0753	0.5638	0.133558	NA	0.052	0.05	2	0.00359191	ENSP00000356430	0	0	0	0	0	0
ENSG00000253148.1	ENSG00000253148	RGS21	1	192286122	192336415	5	1789	50293	protein_coding	0.961182	0.017153	0.000473978	0.0034	0.0067	0.507463	0.0669	0.3514	0.190381	NA	NA	NA	1	3.06e-06	ENSP00000428343	0	0	0	0	0	0
ENSG00000090104.7	ENSG00000090104	RGS1	1	192544857	192549161	4	2649	4304	protein_coding	0.913092	249.709	47418.6	0	0	NA	0.0707	0.3866	0.182876	0	0	0.047	2	0.03858	ENSP00000356429	0	0	1	0	0	0
ENSG00000127074.10	ENSG00000127074	RGS13	1	192605275	192629390	2	5117	24115	protein_coding	0.849233	0.989077	0.549591	0	0.0281	0	0.0907	0.5043	0.179853	0	0	NA	2	0.000101143	ENSP00000375853	0	0	0	0	0	0
ENSG00000116741.6	ENSG00000116741	RGS2	1	192778169	192781403	5	1339	3234	protein_coding	0.78297	268.814	27000.1	0.0025	0.0179	0.139665	0.0218	0.5039	0.0432626	0	0.02	0.008	1	0.0516439	ENSP00000235382	0	0	0	0	0	0
ENSG00000116750.9	ENSG00000116750	UCHL5	1	192981380	193029237	11	5316	47857	protein_coding	0.668877	11.5464	7.0432	0	0	NA	0.0138	0.4658	0.0296264	0	NA	NA	261	0.0011377	ENSP00000356425	0	1	0	0	0	0
ENSG00000116747.8	ENSG00000116747	TROVE2	1	193028552	193060907	8	7840	32355	protein_coding	0.449495	7.63154	1.91037	0.0008	0.0104	0.0769231	0.0546	0.6672	0.0818345	0	0	0.013	1	0.000495582	ENSP00000356411	0	0	0	0	0	0
ENSG00000023572.4	ENSG00000023572	GLRX2	1	193065598	193075244	4	1127	9646	protein_coding	0.8751	34.5127	117.37	0.0027	0.0163	0.165644	0.2411	1.1464	0.210311	0	0.038	0.019	149	0.00686175	ENSP00000356410	0	0	0	0	0	0
ENSG00000134371.9	ENSG00000134371	CDC73	1	193091147	193223031	17	4952	131884	protein_coding	0.428706	11.7926	9.62495	0	0.0096	0	0.0004	0.3706	0.00107933	0	0	0.004	138	0.00124041	ENSP00000356405	0	1	0	0	0	0
ENSG00000162630.5	ENSG00000162630	B3GALT2	1	193148175	193155784	2	3272	7609	protein_coding	0.900131	10.2477	55.0067	0	0.0049	0	0.0258	0.4468	0.057744	0	0	0.022	NA	0.00141879	NA	0	0	0	0	0	0
ENSG00000162687.12	ENSG00000162687	KCNT2	1	196194909	196578355	27	5856	383446	protein_coding	0.807084	5.79552	8.81178	0	0.0054	0	0.012	0.4665	0.0257235	1	NA	NA	NA	0.000524399	NA	0	0	0	0	0	0
ENSG00000000971.11	ENSG00000000971	CFH	1	196621008	196716634	16	6969	95626	protein_coding	0.862147	262.314	8157.83	0.012	0.0212	0.566038	0.21	1.324	0.15861	2	0.043	0.015	1	0.0196767	ENSP00000356399	0	0	1	0	0	0
ENSG00000116785.9	ENSG00000116785	CFHR3	1	196743925	196763203	5	1960	19278	protein_coding	0.998544	82.5795	2888.56	0.0245	0.0742	0.330189	0.3332	1.4719	0.226374	11	0.06	NA	NA	0.0142984	NA	1	0	0	0	0	0
ENSG00000244414.2	ENSG00000244414	CFHR1	1	196788887	196801319	6	1265	12432	protein_coding	0.995624	252.762	21543.8	0.0188	0.017	1.10588	NA	NA	NA	NA	NA	NA	NA	0.0491751	NA	1	0	1	0	0	0
ENSG00000080910.7	ENSG00000080910	CFHR2	1	196788898	196928356	5	1054	139458	protein_coding	0.999911	223.321	5543.16	NA	NA	NA	NA	NA	NA	9	NA	NA	NA	0.0448958	NA	0	0	0	0	0	0
ENSG00000134365.8	ENSG00000134365	CFHR4	1	196819371	196888102	10	2168	68731	protein_coding	0.999398	20.1515	152.548	0.0141	0.0333	0.423423	0.4969	1.5549	0.31957	9	NA	NA	NA	0.00337752	NA	0	0	0	0	0	0
ENSG00000134389.8	ENSG00000134389	CFHR5	1	196946667	196978804	10	2819	32137	protein_coding	0.999828	29.6444	389.735	0.0075	0.0162	0.462963	NA	NA	NA	2	0	NA	NA	0.00444023	NA	0	0	1	0	0	0
ENSG00000143278.3	ENSG00000143278	F13B	1	197008321	197036397	12	2205	28076	protein_coding	0.999433	20.5184	136.031	0.002	0.0135	0.148148	0.1284	0.6917	0.18563	1	0	NA	21	0.00340661	ENSP00000356382	1	0	0	0	0	0
ENSG00000066279.12	ENSG00000066279	ASPM	1	197053258	197115824	28	10859	62566	protein_coding	0.958788	9.81943	16.2337	0.0054	0.0069	0.782609	0.1916	0.6415	0.298675	0	0	0	204	0.00038559	ENSP00000356379	0	0	0	0	0	0
ENSG00000177888.7	ENSG00000177888	ZBTB41	1	197122810	197169672	10	8468	46862	protein_coding	0.463329	4.14591	4.33672	0.0004	0.0105	0.0380952	0.0286	0.5902	0.0484581	0	0.015	0.004	328	0.000242757	ENSP00000356375	0	0	0	0	0	0
ENSG00000134376.10	ENSG00000134376	CRB1	1	197170592	197447585	6	9017	276993	protein_coding	0.959523	1.27336	0.601005	0.006	0.0115	0.521739	0.1436	0.4319	0.332484	0	NA	NA	NA	6.78e-05	NA	1	1	0	0	0	0
ENSG00000213047.7	ENSG00000213047	DENND1B	1	197473878	197744826	9	6951	270948	protein_coding	0.679061	3.75425	2.86958	0.0091	0.0349	0.260745	0.0382	0.4374	0.0873342	0	0.105	0.023	NA	0.000282479	NA	0	0	1	1	0	0
ENSG00000203724.6	ENSG00000203724	C1orf53	1	197871777	197876497	3	585	4720	protein_coding	0.771526	5.81935	2.9916	0	0.0231	0	0.2062	0.5384	0.382987	2	0.052	0.026	NA	0.00126701	NA	0	0	0	0	0	0
ENSG00000143355.11	ENSG00000143355	LHX9	1	197881037	197904608	6	7407	23571	protein_coding	0.977285	1.95403	0.908057	0	0	NA	0.0067	0.2359	0.0284019	0	NA	NA	15	0.000136137	ENSP00000356357	0	0	0	0	0	0
ENSG00000151414.10	ENSG00000151414	NEK7	1	198126093	198291550	10	4139	165457	protein_coding	0.595977	35.317	340.946	0	0.0036	0	0.0108	0.3942	0.0273973	0	0	0.018	115	0.00424933	ENSP00000356355	0	1	0	0	0	0
ENSG00000151418.7	ENSG00000151418	ATP6V1G3	1	198492352	198510075	5	673	17723	protein_coding	0.998822	17.0958	193.353	0.0091	0	NA	0.0788	1.0771	0.0731594	2	NA	NA	62	0.00366844	ENSP00000281087	0	0	0	0	0	1
ENSG00000081237.14	ENSG00000081237	PTPRC	1	198607801	198726545	33	5288	118744	protein_coding	0.951686	133.115	6316.67	0.0081	0.0151	0.536424	0.2265	0.7151	0.316739	0	0	0.018	169	0.0132193	ENSP00000356346	1	1	1	1	0	0
ENSG00000116833.9	ENSG00000116833	NR5A2	1	199996730	200146552	8	5078	149822	protein_coding	0.934119	14.2221	17.5638	0	0.0017	0	0.0514	0.5283	0.0972932	0	0.067	NA	1	0.00146167	ENSP00000356331	0	1	0	0	0	0
ENSG00000162702.7	ENSG00000162702	ZNF281	1	200374068	200379184	2	4889	5116	protein_coding	0.757504	11.8482	14.2248	0.0021	0.0077	0.272727	0.0355	0.2024	0.175395	0	NA	NA	329	0.00125351	ENSP00000294740	0	0	0	0	0	0
ENSG00000118193.7	ENSG00000118193	KIF14	1	200520628	200589862	30	7244	69234	protein_coding	0.965298	6.35302	5.10399	0.0046	0.0127	0.362205	0.17	0.77	0.220779	0	0	0	91	0.000455529	ENSP00000356319	0	0	0	0	0	0
ENSG00000118197.9	ENSG00000118197	DDX59	1	200593024	200639097	8	2892	46073	protein_coding	0.479936	7.73141	4.41692	0.0047	0.0162	0.290123	0.1035	0.6215	0.166533	0	0.179	0.39	504	0.00114554	ENSP00000330460	0	0	0	0	0	0
ENSG00000118200.10	ENSG00000118200	CAMSAP2	1	200708686	200829832	17	7335	121146	protein_coding	0.55748	16.2557	24.2541	0.0024	0.0058	0.413793	0.0384	0.574	0.066899	0	0.028	NA	NA	0.00115171	NA	0	0	0	0	0	0
ENSG00000170128.2	ENSG00000170128	GPR25	1	200842083	200843306	1	1223	1223	protein_coding	0.866917	0.811056	2.17213	0.0011	0.0241	0.0456432	0.1339	0.8987	0.148993	1	0	0.097	NA	0.00015874	NA	0	0	0	0	0	0
ENSG00000163362.6	ENSG00000163362	C1orf106	1	200860176	200884863	10	4288	24687	protein_coding	0.860386	19.7268	185.747	0.007	0.0119	0.588235	0.0664	0.7031	0.0944389	2	0	NA	NA	0.00231326	NA	0	0	0	0	0	0
ENSG00000116852.10	ENSG00000116852	KIF21B	1	200938520	200992828	34	9861	54308	protein_coding	0.865877	13.7999	44.4997	0.0025	0.0254	0.0984252	0.0207	0.805	0.0257143	0	NA	NA	173	0.000639954	ENSP00000328494	0	0	0	0	0	0
ENSG00000081248.6	ENSG00000081248	CACNA1S	1	201008642	201081694	44	6122	73052	protein_coding	0.998665	57.1984	1068.71	0.0033	0.0263	0.125475	0.0385	0.6579	0.0585195	0	0.02	NA	40	0.00494733	ENSP00000355192	1	1	0	0	0	0
ENSG00000232237.2	ENSG00000232237	ASCL5	1	201083081	201096312	2	2024	13231	protein_coding	0.872852	0.892546	0.227006	NA	NA	NA	0.2348	1.4206	0.165282	NA	0.179	NA	NA	0.000152941	NA	0	0	0	0	0	0
ENSG00000116857.12	ENSG00000116857	TMEM9	1	201103900	201140702	2	2890	36802	protein_coding	0.524491	30.9898	116.169	0	0.0252	0	0.0122	0.5022	0.0242931	0	NA	NA	NA	0.00459553	NA	0	0	0	0	0	0
ENSG00000163395.12	ENSG00000163395	IGFN1	1	201159953	201198080	24	11786	38127	protein_coding	0.972429	56.2819	4168.32	NA	NA	NA	0.3033	0.5541	0.547374	0	0.172	NA	36	0.00189412	ENSP00000334714	0	0	0	0	0	0
ENSG00000081277.7	ENSG00000081277	PKP1	1	201252580	201302121	15	5432	49541	protein_coding	0.949618	473.576	22391.8	0.0005	0.0244	0.0204918	0.0216	0.5436	0.0397351	0	0.225	NA	170	0.0459949	ENSP00000263946	1	0	0	0	0	0
ENSG00000118194.14	ENSG00000118194	TNNT2	1	201328136	201346890	4	3010	18754	protein_coding	0.979397	2062.17	386276	0.0037	0.0412	0.0898058	0.0661	1.2095	0.0546507	NA	0.005	NA	223	0.299332	ENSP00000356286	1	1	0	0	0	0
ENSG00000159166.9	ENSG00000159166	LAD1	1	201342372	201368736	10	2896	26364	protein_coding	0.912027	173.884	6737.45	0.0214	0.0465	0.460215	0.2024	0.9224	0.219428	3	0	NA	NA	0.0257685	NA	0	0	0	0	0	0
ENSG00000159173.14	ENSG00000159173	TNNI1	1	201373625	201398994	9	5404	25369	protein_coding	0.997628	416.463	125081	0	0.0371	0	0.0092	0.9788	0.00939926	0	0	NA	216	0.0405557	ENSP00000337022	0	0	0	0	0	0
ENSG00000174307.5	ENSG00000174307	PHLDA3	1	201434620	201438365	2	1529	3745	protein_coding	0.764097	131.233	3248.14	0	0	NA	0.0124	1.0344	0.0119876	0	0	0	9	0.0243659	ENSP00000356278	0	0	0	0	0	0
ENSG00000159176.9	ENSG00000159176	CSRP1	1	201452658	201478584	2	8473	25926	protein_coding	0.796014	959.765	139381	0	0.0248	0	0.0024	0.5303	0.00452574	NA	0.064	0.065	NA	0.056109	NA	0	0	0	0	0	0
ENSG00000134369.11	ENSG00000134369	NAV1	1	201592411	201796102	30	13061	203691	protein_coding	0.771901	14.7139	42.4858	0	0.0207	0	0.0158	0.4763	0.0331724	0	0.105	0.108	NA	0.000399858	NA	0	0	0	0	0	0
ENSG00000198700.5	ENSG00000198700	IPO9	1	201798269	201853422	24	11411	55153	protein_coding	0.367134	9.97116	4.19831	0	0.0027	0	0.0061	0.3547	0.0171976	0	0	0	124	0.000357062	ENSP00000354742	0	1	0	0	0	0
ENSG00000198892.6	ENSG00000198892	SHISA4	1	201857808	201861434	5	1336	3626	protein_coding	0.82279	73.8208	2524.78	0.0074	0.0115	0.643478	0.0399	0.2894	0.137871	0	0	0.05	NA	0.0141756	NA	0	0	0	0	0	0
ENSG00000163431.11	ENSG00000163431	LMOD1	1	201865580	201915715	3	3967	50135	protein_coding	0.821555	633.836	70280.3	0.0044	0.0257	0.171206	0.0874	0.7259	0.120402	0	0	0.214	15	0.0785394	ENSP00000356257	0	0	0	0	0	0
ENSG00000134375.6	ENSG00000134375	TIMM17A	1	201924619	201939789	3	2520	15170	protein_coding	0.468365	21.9591	45.1587	0.0131	0.0097	1.35052	0.0198	0.4554	0.0434783	0	0	0.006	110	0.00346884	ENSP00000356256	0	0	0	0	0	0
ENSG00000176393.6	ENSG00000176393	RNPEP	1	201951500	201975275	11	2416	23775	protein_coding	0.490244	39.4282	228.198	0.0042	0.0169	0.248521	0.0642	0.4867	0.131909	0	0.243	0.774	75	0.00632103	ENSP00000295640	0	0	0	0	0	0
ENSG00000163435.11	ENSG00000163435	ELF3	1	201977073	201986316	8	4986	9243	protein_coding	0.868628	118.22	13668.6	0.0012	0.0168	0.0714286	0.0597	0.8594	0.0694671	0	0	0.357	9	0.012334	ENSP00000352673	0	1	0	0	0	0
ENSG00000170075.8	ENSG00000170075	GPR37L1	1	202091986	202102720	2	6586	10734	protein_coding	0.97979	23.3049	244.869	0.0009	0.0441	0.0204082	0.0474	0.922	0.05141	0	NA	NA	1	0.00186525	ENSP00000356251	0	0	0	0	0	0
ENSG00000143862.3	ENSG00000143862	ARL8A	1	202102532	202113869	7	1786	11337	protein_coding	0.496843	45.5236	610.989	0	0.0268	0	0.0023	0.5373	0.00428066	0	0	0.018	4	0.00810803	ENSP00000272217	0	0	0	0	0	0
ENSG00000143851.11	ENSG00000143851	PTPN7	1	202116141	202130716	10	3755	14575	protein_coding	0.90799	20.5402	72.509	0.0288	0.0706	0.407932	0.0407	0.4655	0.0874329	NA	0	0.134	33	0.00263088	ENSP00000309116	0	0	0	0	0	0
ENSG00000133067.13	ENSG00000133067	LGR6	1	202163029	202288909	18	3549	125880	protein_coding	0.920095	43.8823	913.788	0.0148	0.0194	0.762887	0.0516	0.6135	0.0841076	0	0.16	0.261	8	0.00583078	ENSP00000356247	0	0	0	0	0	0
ENSG00000077152.5	ENSG00000077152	UBE2T	1	202300785	202311108	7	915	10323	protein_coding	0.913224	37.7166	151.347	0.0026	0	NA	0.0938	0.5032	0.186407	0	0.031	0.004	107	0.00776795	ENSP00000356243	0	0	0	0	0	0
ENSG00000077157.16	ENSG00000077157	PPP1R12B	1	202317827	202561834	24	15224	244007	protein_coding	0.78545	8.21693	36.8864	0.0015	0.0092	0.163043	0.0628	0.4561	0.137689	NA	NA	NA	NA	0.000155904	NA	0	0	0	0	0	0
ENSG00000143858.7	ENSG00000143858	SYT2	1	202559724	202679545	9	7605	119821	protein_coding	0.801853	1.98879	64.5749	0	0.0134	0	0.0093	0.9239	0.010066	0	0	0.012	8	0.000134418	ENSP00000356236	0	1	0	0	0	0
ENSG00000117139.12	ENSG00000117139	KDM5B	1	202696526	202778598	27	7411	82072	protein_coding	0.88922	64.756	163.81	0.0022	0.0195	0.112821	0.0289	0.4459	0.0648127	0	0	0.019	149	0.00452091	ENSP00000356234	0	0	0	0	0	0
ENSG00000184774.6	ENSG00000184774	RP11-480I12.4	1	202789394	202796353	3	2807	6959	protein_coding	0.990776	1.32405	0.508075	NA	NA	NA	0.2876	0.8117	0.354318	3	NA	NA	NA	0.000198407	NA	0	0	0	0	0	0
ENSG00000183155.4	ENSG00000183155	RABIF	1	202848085	202858263	2	2428	10178	protein_coding	0.857161	23.3804	52.9606	0.0041	0	NA	0.0379	0.266	0.142481	0	0	0.003	5	0.00374661	ENSP00000356231	0	0	0	0	0	0
ENSG00000117153.11	ENSG00000117153	KLHL12	1	202860228	202897764	12	3347	37536	protein_coding	0.680343	29.729	26.1224	0	0.0139	0	0.0035	0.4179	0.00837521	0	0	0.1	14	0.00407984	ENSP00000356230	0	0	0	0	0	0
ENSG00000159346.8	ENSG00000159346	ADIPOR1	1	202909951	202927700	8	2169	17749	protein_coding	0.835397	244.1	7974.18	0	0.0156	0	0.0183	0.3656	0.0500547	0	0.159	0.014	15	0.040791	ENSP00000341785	0	0	0	0	0	0
ENSG00000159348.8	ENSG00000159348	CYB5R1	1	202930997	202936408	2	3031	5411	protein_coding	0.808817	83.8104	1066.95	0	0.0191	0	0.0428	0.3474	0.123201	3	0.06	0.203	141	0.0121341	ENSP00000356218	0	0	0	0	0	0
ENSG00000163444.7	ENSG00000163444	TMEM183A	1	202976514	202993976	8	3011	17462	protein_coding	0.470061	17.5975	44.5473	0	0.0053	0	0.0307	0.3075	0.0998374	0	0.106	0.042	1	0.00255697	ENSP00000356211	0	0	0	0	0	0
ENSG00000143847.11	ENSG00000143847	PPFIA4	1	202995626	203047868	29	6405	52242	protein_coding	0.916633	21.7495	807.762	NA	NA	NA	0.035	0.4957	0.0706072	0	0.012	0.699	9	0.00179038	ENSP00000272198	0	0	0	0	0	0
ENSG00000122180.4	ENSG00000122180	MYOG	1	203052260	203055164	3	1525	2904	protein_coding	0.995872	38.4349	2402.13	0.0152	0.0262	0.580153	0.0232	0.517	0.0448743	0	0	NA	7	0.00714713	ENSP00000241651	0	1	0	0	0	0
ENSG00000163485.11	ENSG00000163485	ADORA1	1	203059782	203136533	3	3404	76751	protein_coding	0.923805	18.241	55.5425	0.0012	0.0188	0.0638298	0.0253	0.9385	0.0269579	0	0	0.478	3	0.00247646	ENSP00000308549	0	0	0	0	0	0
ENSG00000133055.4	ENSG00000133055	MYBPH	1	203136939	203144941	11	1794	8002	protein_coding	0.975912	27.8271	4930.44	0.0085	0.009	0.944444	0.0753	0.4981	0.151174	NA	0	0.467	32	0.00494731	ENSP00000255416	0	0	0	0	0	0
ENSG00000133048.8	ENSG00000133048	CHI3L1	1	203148059	203155877	2	1918	7818	protein_coding	0.887645	234.923	193468	0.0023	0.0152	0.151316	0.1596	0.7406	0.215501	3	0	0.484	7	0.0409652	ENSP00000255409	0	0	0	0	0	0
ENSG00000133063.11	ENSG00000133063	CHIT1	1	203181955	203242769	12	5595	60814	protein_coding	0.902306	3.99855	200.808	0.0057	0.022	0.259091	0.154	0.6619	0.232664	3	0.02	0.212	4	0.000377738	ENSP00000356198	0	0	1	0	0	0
ENSG00000159388.5	ENSG00000159388	BTG2	1	203274619	203278730	2	2710	4111	protein_coding	0.782347	466.229	298919	0	0.0205	0	0.0266	0.9283	0.0286545	0	0	0.213	32	0.0711855	ENSP00000290551	0	0	0	0	0	0
ENSG00000122176.10	ENSG00000122176	FMOD	1	203309756	203320617	3	3307	10861	protein_coding	0.838869	279.839	16525.5	0	0.0157	0	0.032	0.7366	0.0434428	0	NA	NA	33	0.0387205	ENSP00000347041	0	0	0	0	0	0
ENSG00000188783.5	ENSG00000188783	PRELP	1	203444956	203460480	3	5744	15524	protein_coding	0.813963	409.382	52146.6	0	0.0176	0	0.0473	0.7165	0.0660154	0	0	NA	6	0.0376761	ENSP00000343924	0	0	0	0	0	0
ENSG00000188770.5	ENSG00000188770	OPTC	1	203463271	203477992	8	1351	14721	protein_coding	0.894492	0.607799	0.0640308	0.0042	0.0171	0.245614	0.2251	0.8989	0.250417	0	NA	NA	7	0.000116494	ENSP00000356191	0	0	0	0	0	0
ENSG00000058668.10	ENSG00000058668	ATP2B4	1	203595689	203713209	21	8947	117520	protein_coding	0.742785	105.488	1739.97	0.0033	0.0167	0.197605	0.0875	0.5482	0.159613	2	0	0	103	0.00567065	ENSP00000350310	0	0	0	0	0	0
ENSG00000122188.8	ENSG00000122188	LAX1	1	203734304	203745361	5	3018	11057	protein_coding	0.907996	5.39368	22.761	0.0026	0.0099	0.262626	0.3728	0.4995	0.746346	3	0	0.097	NA	0.000782159	NA	0	0	1	1	0	0
ENSG00000058673.11	ENSG00000058673	ZC3H11A	1	203764782	203823252	17	8387	58470	protein_coding	0.318973	46.9412	115.897	0.0011	0.0058	0.189655	0.1078	0.481	0.224116	1	0.026	0	8	0.00278074	ENSP00000333253	0	0	0	0	0	0
ENSG00000182004.8	ENSG00000182004	SNRPE	1	203830731	203839678	4	963	8947	protein_coding	0.705229	61.7844	134.264	0	0.0099	0	0	0.3117	0	NA	0.018	0.043	339	0.0126322	ENSP00000400591	0	0	0	0	0	0
ENSG00000143842.10	ENSG00000143842	SOX13	1	204042243	204096863	14	3565	54620	protein_coding	0.611935	24.9739	71.6975	0.0237	0.0483	0.490683	0.0474	0.6286	0.0754057	0	0.06	0.009	5	0.00331164	ENSP00000356172	0	0	0	0	0	0
ENSG00000143845.10	ENSG00000143845	ETNK2	1	204100190	204121307	7	2479	21117	protein_coding	0.911506	73.5701	790.543	0.0723	0.1679	0.430613	0.0645	0.5721	0.112743	0	0	0.019	58	0.0116844	ENSP00000356170	0	0	0	0	0	0
ENSG00000143839.12	ENSG00000143839	REN	1	204123944	204135465	9	1447	11521	protein_coding	0.987389	89.8243	23528	0.0032	0.0309	0.10356	0.1851	0.6938	0.266792	0	0	NA	105	0.0169326	ENSP00000272190	1	1	0	0	0	0
ENSG00000170498.7	ENSG00000170498	KISS1	1	204159469	204165614	3	706	6145	protein_coding	0.947469	3.90119	2998.24	0.0062	0.0237	0.261603	0.3034	0.6388	0.474953	3	0	NA	NA	0.000832072	NA	1	0	0	0	0	0
ENSG00000174567.7	ENSG00000174567	GOLT1A	1	204167288	204183220	5	878	15932	protein_coding	0.965141	64.4138	1435.2	0.0036	0.0117	0.307692	0.0749	2.8192	0.0265678	0	0.064	0	14	0.0133515	ENSP00000308535	0	0	0	0	0	0
ENSG00000143850.8	ENSG00000143850	PLEKHA6	1	204187979	204346793	23	7378	158814	protein_coding	0.798804	28.1589	109.676	0.0009	0.0118	0.0762712	0.0387	0.515	0.0751456	0	0.222	0.119	NA	0.00197829	NA	0	0	0	0	0	0
ENSG00000158615.8	ENSG00000158615	PPP1R15B	1	204372515	204380919	2	5225	8404	protein_coding	0.553637	28.914	284.863	0.0061	0.0048	1.27083	0.2064	0.5008	0.412141	0	0.136	0.001	1	0.0029028	ENSP00000356156	0	1	0	0	0	0
ENSG00000133056.9	ENSG00000133056	PIK3C2B	1	204391756	204463852	34	7652	72096	protein_coding	0.604569	11.0473	109.944	0.0014	0.006	0.233333	0.0317	0.5361	0.0591308	NA	0.018	0.037	64	0.000737217	ENSP00000356155	0	0	0	0	0	0
ENSG00000198625.8	ENSG00000198625	MDM4	1	204485511	204542871	11	10062	57360	protein_coding	0.462246	11.7102	11.244	0.0021	0.0107	0.196262	0.0936	0.4727	0.198011	0	0.015	0.189	1	0.00052469	ENSP00000356150	0	1	0	0	0	0
ENSG00000170382.7	ENSG00000170382	LRRN2	1	204586298	204654861	1	5035	68563	protein_coding	0.754224	7.88139	13.075	0.0048	0.0204	0.235294	0.0561	0.5832	0.0961934	NA	0.002	0.011	6	0.00081696	ENSP00000356143	0	0	0	0	0	0
ENSG00000163531.11	ENSG00000163531	NFASC	1	204797779	204991950	32	10622	194171	protein_coding	0.677987	15.128	66.2483	0.0017	0.0154	0.11039	0.0175	0.5598	0.0312612	0	0	NA	27	0.000616808	ENSP00000344786	0	1	0	0	0	0
ENSG00000184144.5	ENSG00000184144	CNTN2	1	205012325	205047627	23	8118	35302	protein_coding	0.957455	18.3247	2730.1	0.0018	0.0151	0.119205	0.0495	0.6402	0.0773196	0	0	NA	44	0.00113479	ENSP00000330633	0	0	0	0	0	1
ENSG00000174529.6	ENSG00000174529	TMEM81	1	205052258	205053645	1	1387	1387	protein_coding	0.645602	6.08174	23.8488	0.0063	0.0193	0.326425	0.2071	0.6258	0.330936	2	0.11	0.079	NA	0.00115796	NA	0	0	0	0	0	0
ENSG00000117222.9	ENSG00000117222	RBBP5	1	205055270	205091143	14	4390	35873	protein_coding	0.491406	8.24529	2.96671	0.006	0.013	0.461538	0.0044	0.3226	0.0136392	0	0.048	0.008	40	0.000952417	ENSP00000264515	0	0	0	0	0	0
ENSG00000133059.12	ENSG00000133059	DSTYK	1	205111632	205180727	13	7861	69095	protein_coding	0.503425	8.09555	8.0138	0.0023	0	NA	0.0447	0.4096	0.109131	0	0.019	0.075	770	0.000524271	ENSP00000356130	0	0	0	0	0	0
ENSG00000133069.10	ENSG00000133069	TMCC2	1	205197304	205242471	5	3733	45167	protein_coding	0.909496	25.4943	998.678	0.0023	0.0379	0.060686	0.0224	0.8225	0.027234	0	0.127	0.018	1	0.00328458	ENSP00000350718	0	0	0	0	0	0
ENSG00000163545.7	ENSG00000163545	NUAK2	1	205271187	205290883	7	3398	19696	protein_coding	0.829051	34.7687	2707.04	0.0092	0.021	0.438095	0.0673	0.7169	0.0938764	0	0	0.14	1	0.00473995	ENSP00000356125	0	1	0	0	0	0
ENSG00000162873.10	ENSG00000162873	KLHDC8A	1	205305220	205326218	9	3168	20998	protein_coding	0.992263	196.014	9390.11	0	0.024	0	0.0232	0.581	0.0399312	0	0.018	0.03	21	0.0277397	ENSP00000356123	0	0	0	0	0	0
ENSG00000186007.5	ENSG00000186007	LEMD1	1	205350506	205425082	6	923	74576	protein_coding	0.997564	71.9059	485.778	0.0049	0.0334	0.146707	0.5288	1.0556	0.500947	3	0	NA	NA	0.014795	NA	0	0	0	0	0	0
ENSG00000117266.11	ENSG00000117266	CDK18	1	205473723	205501921	11	3955	28198	protein_coding	0.810524	32.5236	3038.6	NA	NA	NA	0.04	0.5835	0.0685518	0	0	0.113	246	0.00403414	ENSP00000423665	0	0	0	0	0	0
ENSG00000174514.8	ENSG00000174514	MFSD4	1	205538013	205572046	10	4085	34033	protein_coding	0.961344	57.1613	2359.14	0.0018	0.0183	0.0983607	0.0779	0.5604	0.139008	0	0.192	0.121	NA	0.00694786	NA	0	0	0	0	0	0
ENSG00000158711.9	ENSG00000158711	ELK4	1	205577071	205601090	5	10234	24019	protein_coding	0.64266	15.9324	113.514	0.0047	0	NA	0.0761	0.4436	0.171551	0	0.171	0.027	NA	0.000692886	NA	0	0	0	0	0	0
ENSG00000158715.5	ENSG00000158715	SLC45A3	1	205626979	205649587	5	3336	22608	protein_coding	0.984823	196.856	42129.4	0.0035	0.0151	0.231788	0.0484	0.5083	0.0952194	0	0	0	2	0.0271112	ENSP00000356113	0	0	0	0	0	0
ENSG00000069275.12	ENSG00000069275	NUCKS1	1	205681947	205719404	7	6489	37457	protein_coding	0.630861	120.127	542.652	0	0.0072	0	0.0209	0.4281	0.0488204	0	0.04	0.178	5	0.00976305	ENSP00000356110	0	0	0	0	0	0
ENSG00000117280.8	ENSG00000117280	RAB7L1	1	205737114	205744588	6	3266	7474	protein_coding	0.615902	18.3489	191.879	0	0.0054	0	0.0306	0.3894	0.0785824	2	0.23	0.159	NA	0.00254802	NA	0	0	0	0	0	0
ENSG00000133065.6	ENSG00000133065	SLC41A1	1	205758221	205782876	11	4986	24655	protein_coding	0.830619	61.6008	840.794	0	0.0096	0	0.0082	0.4013	0.0204336	0	0.072	0.146	2	0.00643877	ENSP00000356105	0	0	0	0	0	0
ENSG00000162877.8	ENSG00000162877	PM20D1	1	205797150	205819260	13	2139	22110	protein_coding	0.972247	34.8566	2123.49	0.0039	0.0206	0.18932	0.1688	0.505	0.334257	0	0.093	0.626	17	0.0058637	ENSP00000356104	0	0	0	0	0	0
ENSG00000174502.14	ENSG00000174502	SLC26A9	1	205882176	205912588	21	4778	30412	protein_coding	0.959836	28.7432	563.224	0.0021	0.0103	0.203883	0.055	0.6329	0.0869016	1	0	NA	19	0.00310573	ENSP00000341682	0	0	0	0	0	0
ENSG00000196550.6	ENSG00000196550	FAM72A	1	206136916	206155151	4	2394	18235	protein_coding	0.901228	2.35886	0.818994	0	0	NA	0.0577	0.2722	0.211976	NA	0	NA	NA	0.000380011	NA	0	0	0	0	0	0
ENSG00000198049.5	ENSG00000198049	AVPR1B	1	206223976	206231639	2	2235	7663	protein_coding	0.996107	6.79653	41.0812	0.0041	0.0231	0.177489	0.0998	0.7124	0.14009	0	0	NA	NA	0.00112436	NA	0	0	0	0	0	0
ENSG00000196533.6	ENSG00000196533	C1orf186	1	206238872	206288647	6	1659	49775	protein_coding	0.902265	13.05	298.088	NA	NA	NA	NA	NA	NA	3	0	0	NA	0.00238435	NA	0	0	0	0	0	0
ENSG00000196188.6	ENSG00000196188	CTSE	1	206317459	206332104	9	2234	14645	protein_coding	0.992901	163.359	23061.7	0	0.0184	0	0.1009	0.5674	0.177829	0	0	0.044	75	0.026956	ENSP00000350911	0	0	0	0	0	0
ENSG00000163486.8	ENSG00000163486	SRGAP2	1	206516200	206637783	20	5947	121583	protein_coding	0.684128	22.8619	254.011	NA	NA	NA	0.009	0.375	0.024	0	0	0.011	59	0.0020393	ENSP00000295713	0	0	0	0	0	0
ENSG00000143466.9	ENSG00000143466	IKBKE	1	206643791	206670223	22	3247	26432	protein_coding	0.763813	10.8963	16.1908	NA	NA	NA	0.0849	0.9659	0.0878973	0	NA	NA	2	0.00152249	ENSP00000356087	0	0	1	0	0	0
ENSG00000162888.4	ENSG00000162888	C1orf147	1	206664449	206671061	2	2094	6612	protein_coding	0.765678	0.32218	0.0896711	NA	NA	NA	NA	NA	NA	3	NA	NA	NA	5.45e-05	NA	0	0	0	0	0	0
ENSG00000136653.15	ENSG00000136653	RASSF5	1	206680879	206762616	3	4496	81737	protein_coding	0.831233	40.1936	308.722	NA	NA	NA	0.074	0.5728	0.12919	0	NA	NA	1	0.00455958	ENSP00000347443	0	0	0	0	0	0
ENSG00000143486.11	ENSG00000143486	EIF2D	1	206744620	206785904	15	2079	41284	protein_coding	0.548265	37.696	57.9305	0.0058	0	NA	0.1006	0.3683	0.273147	0	0.137	NA	15	0.00639782	ENSP00000271764	0	0	0	0	0	0
ENSG00000143479.11	ENSG00000143479	DYRK3	1	206808881	206857764	4	2325	48883	protein_coding	0.929932	21.0842	43.6326	0.0025	0.0037	0.675676	0.0528	0.5932	0.0890088	0	0	0.02	914	0.00343686	ENSP00000356076	0	0	0	0	0	0
ENSG00000162889.6	ENSG00000162889	MAPKAPK2	1	206858289	206907628	10	2951	49339	protein_coding	0.510563	65.2265	636.781	0.0012	0.0061	0.196721	0.0198	0.6002	0.032989	0	0.025	0.044	28	0.00956764	ENSP00000356070	0	0	1	0	0	0
ENSG00000136634.5	ENSG00000136634	IL10	1	206940947	206945839	5	1625	4892	protein_coding	0.855389	5.3403	23.2805	0.0027	0.0064	0.421875	0.1522	0.6227	0.244419	2	0	0.294	1	0.000977466	ENSP00000412237	1	0	1	1	0	0
ENSG00000142224.11	ENSG00000142224	IL19	1	206972215	207016324	7	1466	44109	protein_coding	0.947574	1.44059	27.9919	0.0195	0.0241	0.809129	0.2205	0.6191	0.356162	3	NA	NA	NA	0.000270667	NA	0	0	1	0	0	0
ENSG00000162891.6	ENSG00000162891	IL20	1	207038699	207042568	6	1547	3869	protein_coding	0.926733	1.13481	49.9014	0	0.0178	0	0.1601	0.3919	0.408523	3	0	NA	NA	0.000209549	NA	0	0	1	0	0	0
ENSG00000162892.11	ENSG00000162892	IL24	1	207070788	207077484	6	1813	6696	protein_coding	0.939227	21.0169	164.628	0.0074	0	NA	0.3376	0.4582	0.736796	5	0	0.162	NA	0.00372536	NA	0	0	1	0	0	0
ENSG00000162894.7	ENSG00000162894	FAIM3	1	207077731	207096592	8	1942	18861	protein_coding	0.939083	113.211	4811.53	0.0012	0.0184	0.0652174	0.3067	0.5695	0.538543	3	0.043	0.036	5	0.0196195	ENSP00000356058	0	0	0	0	0	0
ENSG00000162896.5	ENSG00000162896	PIGR	1	207101863	207119811	11	4268	17948	protein_coding	0.958202	875.945	495071	0.009	0.0124	0.725806	0.2367	0.6514	0.363371	2	0.011	0.019	6	0.103207	ENSP00000348888	0	0	1	0	0	0
ENSG00000162897.10	ENSG00000162897	FCAMR	1	207131310	207143970	9	2837	12660	protein_coding	0.985768	4.7136	21.9024	0.0084	0.0159	0.528302	0.456	0.6681	0.682533	3	NA	NA	NA	0.00070442	NA	0	0	1	1	0	0
ENSG00000182795.12	ENSG00000182795	C1orf116	1	207191866	207206101	4	5489	14235	protein_coding	0.910079	54.294	549.458	0.0098	0.0128	0.765625	0.2543	0.6267	0.405776	0	0.036	0.002	NA	0.00521921	NA	0	0	0	0	0	0
ENSG00000180667.6	ENSG00000180667	YOD1	1	207217194	207226325	4	6287	9131	protein_coding	0.789483	4.61505	24.76	0.0039	0.0112	0.348214	0.0635	0.3702	0.171529	0	0	0	92	0.000388751	ENSP00000326813	0	0	0	0	0	0
ENSG00000123836.10	ENSG00000123836	PFKFB2	1	207222801	207254369	15	7079	31568	protein_coding	0.779498	19.6609	356.634	0	0	NA	0.0383	0.387	0.0989664	0	0.035	0.076	57	0.00145263	ENSP00000356047	0	0	0	0	0	0
ENSG00000123843.8	ENSG00000123843	C4BPB	1	207262187	207273338	3	1989	11151	protein_coding	0.992084	144.507	3137.08	0.0041	0.016	0.25625	NA	NA	NA	3	0	0.276	3	0.024979	ENSP00000243611	0	0	1	1	0	0
ENSG00000123838.6	ENSG00000123838	C4BPA	1	207277607	207318317	12	2231	40710	protein_coding	0.995549	328.036	41496.6	0.0164	0.0129	1.27132	0.3671	0.5086	0.721785	3	0	0.615	4	0.05427	ENSP00000356037	0	0	1	1	0	0
ENSG00000196352.9	ENSG00000196352	CD55	1	207494853	207534311	10	2750	39458	protein_coding	0.837334	124.745	5562.8	0.0338	0.0715	0.472727	0.5013	1.0708	0.468155	2	0.035	0.395	2	0.0189679	ENSP00000316333	0	0	1	1	0	0
ENSG00000117322.12	ENSG00000117322	CR2	1	207627575	207663240	20	4220	35665	protein_coding	0.971373	45.3626	1124.4	0.0035	0.0076	0.460526	0.2151	0.5009	0.429427	2	0.149	0	14	0.00539184	ENSP00000356024	1	0	1	1	0	0
ENSG00000203710.6	ENSG00000203710	CR1	1	207669492	207813992	39	7430	144500	protein_coding	0.952411	20.548	316.178	0.126	0.2184	0.576923	0.2934	0.5511	0.53239	5	0	0.063	10	0.0014257	ENSP00000356016	0	0	1	1	0	0
ENSG00000197721.12	ENSG00000197721	CR1L	1	207818458	207911761	12	1776	93303	protein_coding	0.951522	1.08341	1.71413	NA	NA	NA	0.3242	0.6972	0.465003	8	NA	0.167	NA	0.000192775	NA	0	0	0	0	0	0
ENSG00000117335.14	ENSG00000117335	CD46	1	207925402	207968858	9	7817	43456	protein_coding	0.592245	70.7881	1018.49	0.0055	0.0188	0.292553	0.3834	0.9221	0.41579	2	0	0.004	NA	0.00461625	NA	0	0	1	1	0	0
ENSG00000174059.12	ENSG00000174059	CD34	1	208057594	208084747	8	2866	27153	protein_coding	0.739461	112.605	3646.03	0.0103	0.0084	1.22619	0.2336	0.5	0.4672	2	0	0	NA	0.0168186	NA	0	0	1	0	0	0
ENSG00000076356.6	ENSG00000076356	PLXNA2	1	208195587	208417665	32	11412	222078	protein_coding	0.710349	17.1802	175.82	0.0005	0.0179	0.027933	0.0167	0.6968	0.0239667	0	0	0.171	NA	0.000615893	NA	0	0	0	0	0	0
ENSG00000008118.5	ENSG00000008118	CAMK1G	1	209757062	209787283	13	2599	30221	protein_coding	0.968024	29.8494	220.859	0.0009	0.0217	0.0414747	0.0398	0.5942	0.0669808	0	0	NA	101	0.00463723	ENSP00000009105	0	0	0	0	0	0
ENSG00000196878.8	ENSG00000196878	LAMB3	1	209788215	209825811	22	4283	37596	protein_coding	0.723697	26.7095	1393.56	0.0071	0.0178	0.398876	0.0948	0.7164	0.132328	0	0	0.244	11	0.00313784	ENSP00000348384	0	1	0	0	0	0
ENSG00000123689.5	ENSG00000123689	G0S2	1	209848765	209849733	2	864	968	protein_coding	0.890234	578.131	352379	0	0.0261	0	0.1349	1.3924	0.0968831	0	0.012	0.028	NA	0.120112	NA	0	0	0	0	0	0
ENSG00000117594.5	ENSG00000117594	HSD11B1	1	209859510	209908295	7	1470	48785	protein_coding	0.954871	157.793	4250.9	0.0017	0	NA	0.1321	0.6831	0.193383	2	0	0	75	0.0296783	ENSP00000261465	1	0	0	0	0	0
ENSG00000009790.10	ENSG00000009790	TRAF3IP3	1	209929377	209955668	4	3298	26291	protein_coding	0.903921	25.6737	194.856	0.0078	0.0128	0.609375	0.1533	0.4494	0.341121	1	0.032	0.189	3	0.00355932	ENSP00000355991	0	0	0	0	0	0
ENSG00000162757.3	ENSG00000162757	C1orf74	1	209955661	209957904	2	1574	2243	protein_coding	0.754008	2.65569	3.19771	0.0038	0.0076	0.5	0.1241	0.4868	0.25493	0	0.046	0	NA	0.00049106	NA	0	0	0	0	0	0
ENSG00000117595.6	ENSG00000117595	IRF6	1	209959036	209979465	9	4297	20429	protein_coding	0.877071	83.0693	936.863	0	0.0161	0	0.0108	0.5059	0.0213481	0	0	0.576	2	0.00974333	ENSP00000355988	1	1	1	0	0	0
ENSG00000117597.13	ENSG00000117597	DIEXF	1	210001352	210030910	12	8434	29558	protein_coding	0.620636	5.01862	8.77354	0.0033	0.0085	0.388235	0.0637	0.6125	0.104	0	0.013	NA	403	0.000295317	ENSP00000419005	0	0	0	0	0	0
ENSG00000143469.12	ENSG00000143469	SYT14	1	210111538	210337636	9	5180	226098	protein_coding	0.938644	1.66375	0.286006	0.0237	0.0441	0.537415	0.0595	0.5253	0.113269	0	0	NA	NA	0.00016799	NA	1	0	0	0	0	0
ENSG00000082497.7	ENSG00000082497	SERTAD4	1	210406144	210419976	4	5215	13832	protein_coding	0.696817	4.15656	3.52591	0.0032	0.0064	0.5	0.0984	0.5194	0.189449	1	0	NA	NA	0.000418539	NA	0	0	0	0	0	0
ENSG00000054392.8	ENSG00000054392	HHAT	1	210501596	210849638	12	3614	348042	protein_coding	0.668258	4.22736	5.7237	0.0389	0.0875	0.444571	0.1254	0.7495	0.167312	0	0.019	0.023	4	0.000555771	ENSP00000438468	0	1	0	0	0	0
ENSG00000143473.7	ENSG00000143473	KCNH1	1	210856555	211307457	11	3091	450902	protein_coding	0.957175	2.2592	3.73511	0.0015	0.0117	0.128205	0.0155	0.6196	0.0250161	1	0.026	0.471	NA	0.000323989	NA	0	0	0	0	0	0
ENSG00000117625.9	ENSG00000117625	RCOR3	1	211431719	211489727	11	4235	58008	protein_coding	0.541941	21.1549	21.6452	0.0207	0.0168	1.23214	0.0792	0.5099	0.155325	0	0	0.003	32	0.00251149	ENSP00000413929	0	0	0	0	0	0
ENSG00000082512.10	ENSG00000082512	TRAF5	1	211499957	211548288	6	4952	48331	protein_coding	0.603457	15.0024	95.5924	0.0049	0.0113	0.433628	0.1433	0.7142	0.200644	1	0.045	0.041	NA	0.00157679	NA	0	0	0	0	0	0
ENSG00000198570.5	ENSG00000198570	RD3	1	211649864	211666259	3	4263	16395	protein_coding	0.799437	1.03115	0.768672	0.0042	0.074	0.0567568	0.0648	1.5987	0.0405329	0	0	NA	NA	0.000121452	NA	1	0	0	0	0	0
ENSG00000170385.9	ENSG00000170385	SLC30A1	1	211744910	211752084	2	5472	7174	protein_coding	0.741605	24.604	228.357	0.0051	0.013	0.392308	0.0808	0.5751	0.140497	0	0	0.015	132	0.00237121	ENSP00000355968	0	1	0	0	0	0
ENSG00000117650.8	ENSG00000117650	NEK2	1	211836114	211848960	8	2123	12846	protein_coding	0.971244	26.0456	67.2822	0.001	0.0059	0.169492	0.0626	0.7647	0.0818622	0	0	0	283	0.00438004	ENSP00000355966	0	0	0	0	0	0
ENSG00000123684.8	ENSG00000123684	LPGAT1	1	211916799	212004114	8	7774	87315	protein_coding	0.649138	20.2771	72.1997	0.0014	0	NA	0.0494	0.347	0.142363	0	0	0.097	37	0.00133311	ENSP00000355963	0	0	0	0	0	0
ENSG00000143493.8	ENSG00000143493	INTS7	1	212113741	212208884	21	4426	95143	protein_coding	0.765382	11.8868	3.529	0	0.0126	0	0.0225	0.6468	0.0347866	0	0	0.002	55	0.00136557	ENSP00000355961	0	0	0	0	0	0
ENSG00000143476.13	ENSG00000143476	DTL	1	212208919	212280742	15	4558	71823	protein_coding	0.959604	14.9924	13.631	0.0018	0.0152	0.118421	0.0543	0.4016	0.135209	0	0	0	176	0.00168384	ENSP00000355958	0	1	0	0	0	0
ENSG00000066027.7	ENSG00000066027	PPP2R5A	1	212458879	212535200	13	3110	76321	protein_coding	0.45921	33.6472	168.266	0	0.0042	0	0.0119	0.3409	0.0349076	1	NA	NA	5	0.00480159	ENSP00000261461	0	0	0	0	0	0
ENSG00000065600.8	ENSG00000065600	TMEM206	1	212537273	212588243	8	2467	50970	protein_coding	0.720483	6.57523	296.355	0.0058	0.0149	0.389262	0.0458	0.7527	0.0608476	0	0	0.088	NA	0.00104671	NA	0	0	0	0	0	0
ENSG00000117691.5	ENSG00000117691	NENF	1	212606229	212619714	4	938	13485	protein_coding	0.669919	93.4455	493.042	0	0.0068	0	0.0768	0.554	0.138628	0	0.025	0.033	2	0.0191711	ENSP00000355955	0	0	0	0	0	0
ENSG00000162772.12	ENSG00000162772	ATF3	1	212738676	212794119	2	2115	55443	protein_coding	0.727328	79.132	25282.5	0.0052	0.0131	0.396947	0.0232	0.5161	0.0449525	0	0	0.026	62	0.0133432	ENSP00000344352	0	0	0	0	0	0
ENSG00000162771.6	ENSG00000162771	FAM71A	1	212797789	212800120	1	2331	2331	protein_coding	0.998972	92.9928	1913	0.0186	0.0119	1.56303	0.3587	0.7597	0.47216	2	0	NA	NA	0.0151331	NA	0	0	0	0	0	0
ENSG00000123685.4	ENSG00000123685	BATF3	1	212859760	212873327	2	2355	13567	protein_coding	0.790878	5.73308	4.30731	0	0.0116	0	0.0852	1.4508	0.0587262	NA	0	0.149	16	0.000928673	ENSP00000243440	0	0	0	0	0	0
ENSG00000117697.10	ENSG00000117697	NSL1	1	212899495	212965124	6	2311	65629	protein_coding	0.536406	7.67415	4.46657	0.0072	0.0036	2	0.2071	0.7449	0.278024	2	0.107	0.27	32	0.00125224	ENSP00000355944	0	0	0	0	0	0
ENSG00000203705.6	ENSG00000203705	TATDN3	1	212965170	212989968	10	2379	24798	protein_coding	0.419733	5.54123	4.26849	0.0016	0.0111	0.144144	0.0848	0.4487	0.18899	0	0.117	0.122	26	0.000894294	ENSP00000431376	0	0	0	0	0	0
ENSG00000185523.6	ENSG00000185523	C1orf227	1	213003483	213020991	3	503	17508	protein_coding	0.991911	9.13528	18.8254	0.0095	0.0255	0.372549	0.3277	0.5699	0.575013	5	0.027	NA	NA	0.00201716	NA	0	0	0	0	0	0
ENSG00000162769.8	ENSG00000162769	FLVCR1	1	213031597	213072705	10	5929	41108	protein_coding	0.727005	6.95041	11.4047	0.0008	0.0093	0.0860215	0.1148	0.5524	0.20782	0	0.058	0.456	3	0.000620774	ENSP00000355938	1	1	0	0	0	0
ENSG00000143494.11	ENSG00000143494	VASH2	1	213123862	213165379	9	4215	41517	protein_coding	0.939447	8.24985	14.2388	0	0.0214	0	0.0165	0.6207	0.0265829	0	0	0	NA	0.000980612	NA	0	0	0	0	0	0
ENSG00000174606.8	ENSG00000174606	ANGEL2	1	213165524	213189168	9	4640	23644	protein_coding	0.36514	7.00549	4.75373	0	0.0036	0	0.0801	0.5205	0.15389	0	0.117	0.11	37	0.000776231	ENSP00000355929	0	0	0	0	0	0
ENSG00000136643.7	ENSG00000136643	RPS6KC1	1	213224589	213448116	15	5475	223527	protein_coding	0.633113	11.2487	8.83616	0.0004	0.007	0.0571429	0.1335	0.6695	0.199403	0	0.005	0.062	32	0.00107904	ENSP00000355927	0	0	0	0	0	0
ENSG00000117707.11	ENSG00000117707	PROX1	1	214156524	214214595	5	8235	58071	protein_coding	0.92909	20.0672	48.8016	0	0	NA	0.0074	0.383	0.0193211	0	0	NA	4	0.00122233	ENSP00000261454	0	1	0	0	0	0
ENSG00000143499.9	ENSG00000143499	SMYD2	1	214454445	214510474	10	4722	56029	protein_coding	0.86627	51.6	492.365	0.0044	0.014	0.314286	0.0347	0.6481	0.0535411	0	0.163	0.106	128	0.00563619	ENSP00000355924	0	0	0	0	0	0
ENSG00000152104.7	ENSG00000152104	PTPN14	1	214522039	214725792	19	12966	203753	protein_coding	0.649184	9.31067	7.04758	0.0016	0.0165	0.0969697	0.0405	0.7628	0.0530939	0	0.112	0.033	6	0.000257286	ENSP00000355923	0	0	0	0	0	0
ENSG00000117724.8	ENSG00000117724	CENPF	1	214776538	214837931	20	10287	61393	protein_coding	0.947396	13.7863	38.8209	0.0056	0.0112	0.5	0.2261	0.6239	0.362398	0	0	0.011	105	0.000596082	ENSP00000355922	0	0	0	0	0	0
ENSG00000082482.9	ENSG00000082482	KCNK2	1	215179118	215410436	7	3372	231318	protein_coding	0.958217	36.3607	201.5	0	0	NA	0.0178	0.4938	0.036047	0	0	NA	NA	0.00497941	NA	0	0	0	0	0	0
ENSG00000136636.8	ENSG00000136636	KCTD3	1	215740735	215795149	18	3913	54414	protein_coding	0.703429	45.6001	210.701	0	0.0117	0	0.0322	0.8586	0.0375029	0	0.052	0	14	0.00569997	ENSP00000259154	0	0	0	0	0	0
ENSG00000042781.8	ENSG00000042781	USH2A	1	215796236	216596738	73	18882	800502	protein_coding	0.93762	0.695806	0.532744	0.0064	0.011	0.581818	0.1788	0.5923	0.301874	0	NA	NA	8	7.17e-06	ENSP00000305941	1	0	0	0	0	0
ENSG00000196482.12	ENSG00000196482	ESRRG	1	216676588	217311097	9	5523	634509	protein_coding	0.929711	5.95831	24.3385	0.0173	0.0472	0.366525	0.0168	0.3866	0.0434558	0	0	NA	NA	0.000569626	NA	0	1	0	0	0	0
ENSG00000092978.6	ENSG00000092978	GPATCH2	1	217600334	217804424	10	5841	204090	protein_coding	0.645769	4.3523	0.665165	0.0018	0.004	0.45	0.0803	0.6513	0.123292	0	0.077	0.056	NA	0.000394284	NA	0	0	0	0	0	0
ENSG00000162814.6	ENSG00000162814	SPATA17	1	217804666	218045038	11	5807	240372	protein_coding	0.990715	15.3314	32.4734	0.0044	0.0051	0.862745	0.1523	0.8923	0.170683	0	0	NA	15	0.00139467	ENSP00000355900	0	0	0	0	0	0
ENSG00000067533.5	ENSG00000067533	RRP15	1	218458629	218511325	5	7766	52696	protein_coding	0.405893	4.19436	3.46735	0.0088	0.0036	2.44444	0.1872	1.4432	0.129712	0	0.226	0.177	346	0.000275526	ENSP00000355899	0	0	0	0	0	0
ENSG00000092969.7	ENSG00000092969	TGFB2	1	218519577	218617961	8	5045	98384	protein_coding	0.754419	10.2042	67.1713	0	0.0065	0	0.0211	0.5174	0.0407808	0	0.01	NA	9	0.00105572	ENSP00000355896	0	1	1	0	0	0
ENSG00000228208.2	ENSG00000228208	C1orf143	1	218683438	218699320	2	811	15882	protein_coding	0.938345	0.149947	0.078039	NA	NA	NA	NA	NA	NA	NA	NA	NA	NA	3.14e-05	NA	0	0	0	0	0	0
ENSG00000143353.7	ENSG00000143353	LYPLAL1	1	219347186	219386207	5	2164	39021	protein_coding	0.555185	11.7969	26.0123	0.002	0	NA	0.143	0.5695	0.251097	1	0.057	0.06	1	0.00197432	ENSP00000355895	0	0	0	0	0	0
ENSG00000196660.6	ENSG00000196660	SLC30A10	1	219858769	220131989	4	3646	273220	protein_coding	0.979523	8.64931	23.8393	0.0056	0.0055	1.01818	0.1072	0.6177	0.173547	0	0	NA	133	0.00113046	ENSP00000355893	0	0	0	0	0	0
ENSG00000136628.13	ENSG00000136628	EPRS	1	220141943	220220000	32	4982	78057	protein_coding	0.686272	55.7348	422.24	0.0018	0.0111	0.162162	0.057	0.5657	0.10076	0	NA	NA	1151	0.00582595	ENSP00000355890	0	0	1	0	0	0
ENSG00000162813.13	ENSG00000162813	BPNT1	1	220230824	220263804	10	2727	32980	protein_coding	0.642003	14.9843	50.1408	0	0.0034	0	0.0409	0.671	0.0609538	0	0	0.002	1	0.00228489	ENSP00000318852	0	0	0	0	0	0
ENSG00000067704.8	ENSG00000067704	IARS2	1	220267444	220321380	23	3534	53936	protein_coding	0.439261	38.2015	84.5977	0.0018	0.0218	0.0825688	0.0922	0.7425	0.124175	0	0	0.01	322	0.00508641	ENSP00000303279	0	0	0	0	0	0
ENSG00000118873.11	ENSG00000118873	RAB3GAP2	1	220321635	220445796	35	7222	124161	protein_coding	0.695954	12.4302	5.71581	0.0007	0.0082	0.0853659	0.0585	0.6217	0.0940968	0	NA	NA	NA	0.000892805	NA	1	0	0	0	0	0
ENSG00000224867.2	ENSG00000224867	AC096644.1	1	220603286	220608023	3	150	4737	protein_coding	0.993586	0.00380586	0.000492053	NA	NA	NA	NA	NA	NA	NA	NA	NA	NA	8.92e-07	NA	0	0	0	0	0	0
ENSG00000116141.11	ENSG00000116141	MARK1	1	220701568	220837803	17	5213	136235	protein_coding	0.655283	7.97204	9.83049	0.0035	0.0064	0.546875	0.028	0.6167	0.045403	1	NA	NA	44	0.000802132	ENSP00000355884	0	0	0	0	0	0
ENSG00000162817.6	ENSG00000162817	C1orf115	1	220863187	220872499	2	3411	9312	protein_coding	0.788127	57.1103	1626.97	0.0055	0.0323	0.170279	0.1712	0.8865	0.193119	2	0.074	0.554	NA	0.00776049	NA	0	0	0	0	0	0
ENSG00000117791.11	ENSG00000117791	2020-03-02	1	220921567	220958150	8	2119	36583	protein_coding	0.818969	56.0061	393.932	0.0042	0.0296	0.141892	0.1399	0.7822	0.178855	NA	0.169	NA	5	0.00944023	ENSP00000355880	0	0	0	0	0	0
ENSG00000186205.8	ENSG00000186205	2020-03-01	1	220960101	220987735	6	2701	27634	protein_coding	0.870947	39.4048	1200.29	0.0042	0.0148	0.283784	0.1298	0.8502	0.15267	2	0.076	NA	15	0.00602773	ENSP00000355877	0	0	0	0	0	0
ENSG00000136630.11	ENSG00000136630	HLX	1	221051699	221058401	4	3319	6702	protein_coding	0.742157	16.4324	50.1875	0.0018	0.0112	0.160714	0.0587	0.7042	0.083357	0	0	0.001	NA	0.00226338	NA	0	1	1	1	0	0
ENSG00000143507.13	ENSG00000143507	DUSP10	1	221874766	221915518	4	2672	40752	protein_coding	0.829528	17.7593	38.6136	0.0011	0.0122	0.0901639	0.016	0.3431	0.0466336	0	0	0.084	60	0.00273638	ENSP00000355866	0	0	1	1	0	0
ENSG00000143512.8	ENSG00000143512	HHIPL2	1	222695602	222721445	9	2566	25843	protein_coding	0.975552	6.1413	4.15554	0.0267	0.0613	0.435563	0.1471	0.666	0.220871	0	0.006	0.179	NA	0.000960727	NA	0	0	0	0	0	0
ENSG00000143498.13	ENSG00000143498	TAF1A	1	222731244	222763275	12	1899	32031	protein_coding	0.55981	3.05505	0.742556	0.003	0.0122	0.245902	0.1362	0.7659	0.17783	0	0.026	0.27	2	0.000535111	ENSP00000327072	0	0	0	0	0	0
ENSG00000154305.12	ENSG00000154305	MIA3	1	222791428	222841354	28	8114	49926	protein_coding	0.434569	12.705	48.4539	NA	NA	NA	0.3047	0.7347	0.414727	0	0	0.028	NA	0.000788056	NA	0	0	0	0	0	0
ENSG00000186063.8	ENSG00000186063	AIDA	1	222841355	222886552	10	4040	45197	protein_coding	0.396174	11.6212	11.7558	0	0.0062	0	0.0097	0.2209	0.0439113	0	0.004	0.038	NA	0.00141962	NA	0	0	0	0	0	0
ENSG00000162819.7	ENSG00000162819	BROX	1	222885895	222908538	13	4111	22643	protein_coding	0.334143	11.3661	12.6517	0.0022	0.0132	0.166667	0.0413	0.6971	0.0592454	0	0.085	0	2	0.00137872	ENSP00000343742	0	0	0	0	0	0
ENSG00000197520.6	ENSG00000197520	FAM177B	1	222910549	222924147	6	1988	13598	protein_coding	0.955468	8.3531	59.9768	0.017	0.0181	0.939227	NA	NA	NA	3	0	0.279	NA	0.00143868	NA	0	0	0	0	0	0
ENSG00000154309.7	ENSG00000154309	DISP1	1	222988406	223179337	8	4754	190931	protein_coding	0.639741	7.61781	26.3394	0.0042	0.0108	0.388889	0.0835	0.7454	0.11202	0	0	0.134	5	0.000827893	ENSP00000284476	0	0	0	0	0	0
ENSG00000187554.7	ENSG00000187554	TLR5	1	223282748	223316624	4	4084	33876	protein_coding	0.89067	18.301	346.039	NA	NA	NA	0.1997	0.7024	0.284311	0	0.075	0.061	15	0.0022232	ENSP00000340089	0	0	1	0	0	0
ENSG00000143502.10	ENSG00000143502	SUSD4	1	223394161	223537544	8	3472	143383	protein_coding	0.881365	22.4903	270.534	0.0021	0.0128	0.164062	0.0466	0.4028	0.11569	0	NA	NA	1	0.00302705	ENSP00000344219	0	0	1	1	0	0
ENSG00000178395.5	ENSG00000178395	C1orf65	1	223566715	223568812	1	2097	2097	protein_coding	0.999651	39.3073	223.503	0.0075	0.0213	0.352113	0.2898	1.2852	0.22549	2	0	NA	NA	0.00664936	NA	0	0	0	0	0	0
ENSG00000203697.7	ENSG00000203697	CAPN8	1	223711349	223853436	10	2586	142087	protein_coding	0.960672	28.7903	989.83	NA	NA	NA	0.1671	0.7385	0.226269	0	0.03	0.175	731	0.00449134	ENSP00000355837	0	0	0	0	0	0
ENSG00000162909.13	ENSG00000162909	CAPN2	1	223889295	223963720	9	4121	74425	protein_coding	0.512575	68.3466	466.952	0.0006	0.0134	0.0447761	0.0321	0.6732	0.0476827	0	0.105	0.054	729	0.00824649	ENSP00000295006	0	1	0	0	0	0
ENSG00000143514.12	ENSG00000143514	TP53BP2	1	223967601	224033674	19	4722	66073	protein_coding	0.535428	16.7627	84.7659	0.0064	0.018	0.355556	0.047	0.5219	0.0900556	0	0.073	0.099	10	0.00183504	ENSP00000341957	0	1	0	0	0	0
ENSG00000269358.1	ENSG00000269358	AC138393.1	1	224215760	224216371	3	132	611	protein_coding	0.851479	0.104961	0.0196157	NA	NA	NA	NA	NA	NA	NA	NA	NA	NA	2.47e-05	NA	0	0	0	0	0	0
ENSG00000143756.7	ENSG00000143756	FBXO28	1	224301789	224349749	5	5446	47960	protein_coding	0.541595	13.028	11.1404	0	0.0102	0	0.0262	0.4212	0.0622032	0	0	0.098	NA	0.00125852	NA	0	0	0	0	0	0
ENSG00000143753.8	ENSG00000143753	DEGS1	1	224363458	224381143	3	2098	17685	protein_coding	0.871381	241.118	6859.9	0.0012	0.0188	0.0638298	0.0855	0.702	0.121795	0	0.111	0.411	10	0.0407692	ENSP00000316476	0	0	0	0	0	0
ENSG00000143748.13	ENSG00000143748	NVL	1	224415036	224518089	23	3100	103053	protein_coding	0.539063	9.87749	13.5093	NA	NA	NA	0.0684	0.4483	0.152576	0	0.157	0.138	353	0.00141425	ENSP00000281701	0	0	0	0	0	0
ENSG00000143771.7	ENSG00000143771	CNIH4	1	224544552	224567161	5	4120	22609	protein_coding	0.442122	10.7102	34.8664	0.0068	0	NA	0.0214	0.451	0.0474501	0	0.305	0.095	20	0.00129213	ENSP00000420443	0	0	0	0	0	0
ENSG00000162923.10	ENSG00000162923	WDR26	1	224572845	224624735	14	6858	51890	protein_coding	0.396143	30.2369	111.899	0	0	NA	0.0174	0.3362	0.0517549	0	0	0	29	0.00231044	ENSP00000408108	0	0	0	0	0	0
ENSG00000143786.3	ENSG00000143786	CNIH3	1	224622362	224928251	6	2552	305889	protein_coding	0.874245	3.52724	3.34839	0	0.026	0	0	0.5698	0	0	0.035	NA	11	0.00055363	ENSP00000272133	0	0	0	0	0	0
ENSG00000185842.10	ENSG00000185842	DNAH14	1	225083964	225586996	84	13704	503032	protein_coding	0.948792	3.31258	0.723444	0.0028	0.0037	0.756757	NA	NA	NA	1	0.03	NA	NA	8.09e-05	NA	0	0	0	0	0	1
ENSG00000143815.10	ENSG00000143815	LBR	1	225589204	225616627	14	3760	27423	protein_coding	0.647547	37.3132	344.008	0.0051	0.0047	1.08511	0.1289	0.7547	0.170796	0	0	0	73	0.00478293	ENSP00000272163	1	1	0	0	0	0
ENSG00000203691.2	ENSG00000203691	AC092811.1	1	225600404	225602040	1	1636	1636	protein_coding	0.657617	1.43009	1.21179	NA	NA	NA	NA	NA	NA	0	0	NA	NA	0.000261276	NA	0	0	0	0	0	0
ENSG00000154380.12	ENSG00000154380	ENAH	1	225674537	225840844	15	13153	166307	protein_coding	0.658164	22.9376	62.8187	0.0009	0.0142	0.0633803	0.0429	0.3868	0.11091	0	NA	NA	12	0.000613427	ENSP00000355809	0	0	0	0	0	0
ENSG00000143742.8	ENSG00000143742	SRP9	1	225965531	225978168	4	1592	12637	protein_coding	0.438406	94.1584	898.043	0	0	NA	0.0369	0.547	0.0674589	NA	0.04	0.017	134	0.0173381	ENSP00000305230	0	0	0	0	0	0
ENSG00000143819.8	ENSG00000143819	EPHX1	1	225997794	226033260	9	1767	35466	protein_coding	0.901486	588.771	52012.6	0.0049	0.0098	0.5	0.0851	0.6896	0.123405	0	0.035	0	14	0.105292	ENSP00000272167	0	0	0	0	0	0
ENSG00000196187.7	ENSG00000196187	TMEM63A	1	226033237	226070069	4	5403	36832	protein_coding	0.758641	31.3123	261.368	0.0011	0.0243	0.0452675	0.0507	0.6411	0.0790828	1	0.091	0.041	5	0.00305194	ENSP00000355800	0	0	0	0	0	0
ENSG00000243709.1	ENSG00000243709	LEFTY1	1	226073982	226099082	4	1622	25100	protein_coding	0.980559	21.6085	389.447	NA	NA	NA	0.0947	1.2638	0.0749327	NA	0	0.028	2	0.00395577	ENSP00000272134	0	1	0	0	0	0
ENSG00000143811.12	ENSG00000143811	PYCR2	1	226107578	226111978	5	3144	4400	protein_coding	0.442702	55.2912	201.598	NA	NA	NA	0.0378	0.6582	0.0574294	3	0.019	0.176	177	0.00785795	ENSP00000342502	0	0	0	0	0	0
ENSG00000143768.7	ENSG00000143768	LEFTY2	1	226124298	226129189	4	2283	4891	protein_coding	0.945987	56.7702	10302.5	0	0.06	0	0.0983	1.247	0.0788292	3	0.014	NA	2	0.00931685	ENSP00000355785	0	1	0	0	0	0
ENSG00000143751.9	ENSG00000143751	SDE2	1	226170403	226187032	7	3968	16629	protein_coding	0.553705	13.4511	55.4671	0.0053	0.0169	0.313609	0.2283	0.7363	0.310064	0	NA	NA	28	0.00167209	ENSP00000272091	0	0	0	0	0	0
ENSG00000163041.5	ENSG00000163041	H3F3A	1	226249552	226259702	3	1860	10150	protein_coding	0.7738	23.6821	193.587	0.0059	5.9479	0.000991947	NA	NA	NA	1	0.368	0.017	145	0.00417152	ENSP00000355778	0	1	0	0	0	0
ENSG00000182827.8	ENSG00000182827	ACBD3	1	226332380	226374431	8	3565	42051	protein_coding	0.549381	28.0559	32.6502	0.0009	0.014	0.0642857	0.0546	0.4604	0.118593	0	0.118	0.026	3	0.00372229	ENSP00000355777	0	0	0	0	0	0
ENSG00000185155.7	ENSG00000185155	MIXL1	1	226411319	226414755	2	2003	3436	protein_coding	0.908709	0.907783	0.909057	0.0119	0.0207	0.574879	0.2024	0.8704	0.232537	0	NA	NA	NA	0.000156055	NA	0	1	0	0	0	0
ENSG00000183814.11	ENSG00000183814	LIN9	1	226418850	226497570	15	3552	78720	protein_coding	0.759909	3.7474	1.89119	0.0334	0.0509	0.656189	0.0144	0.4919	0.0292742	0	0	0.023	57	0.000497824	ENSP00000329102	0	1	0	0	0	0
ENSG00000143799.8	ENSG00000143799	PARP1	1	226548392	226595780	23	3935	47388	protein_coding	0.803099	71.2449	144.492	0.0045	0.0193	0.233161	0.037	0.7501	0.0493268	0	0.065	0.186	203	0.00886738	ENSP00000355759	0	1	0	0	0	0
ENSG00000203685.5	ENSG00000203685	C1orf95	1	226736501	226796915	4	7701	60414	protein_coding	0.832511	15.9883	312.498	0	0.0206	0	0.0088	0.7745	0.0113622	0	0	NA	NA	0.00106359	NA	0	0	0	0	0	0
ENSG00000143772.5	ENSG00000143772	ITPKB	1	226819391	226927024	8	6142	107633	protein_coding	0.648278	33.0189	610.604	0.0065	0.0174	0.373563	0.2517	0.8798	0.286088	0	0	0	NA	0.00284473	NA	0	0	0	0	0	0
ENSG00000143801.12	ENSG00000143801	PSEN2	1	227057885	227083806	13	2452	25921	protein_coding	0.542881	13.4664	15.0011	0.001	0.0294	0.0340136	0.0178	0.7468	0.023835	0	0.054	0.101	14	0.00215288	ENSP00000355747	0	0	0	0	0	0
ENSG00000163050.12	ENSG00000163050	ADCK3	1	227085237	227175246	20	5503	90009	protein_coding	0.91674	178.004	4217.57	0.002	0.0345	0.057971	0.0644	0.9641	0.066798	0	NA	NA	28	0.0170691	ENSP00000355739	1	0	0	0	0	0
ENSG00000143776.14	ENSG00000143776	CDC42BPA	1	227177566	227506175	36	10819	328609	protein_coding	0.541303	13.3312	21.7985	NA	NA	NA	0.0196	0.402	0.0487562	0	0.119	0.245	89	0.000525729	ENSP00000355731	0	0	0	0	0	0
ENSG00000181450.13	ENSG00000181450	ZNF678	1	227751244	227865144	4	8552	113900	protein_coding	0.443549	1.64923	0.518089	0.01	0.0274	0.364964	0.2619	1.2384	0.211483	9	NA	NA	326	9.52e-05	ENSP00000440403	0	0	0	0	0	0
ENSG00000143740.10	ENSG00000143740	SNAP47	1	227916240	227968927	5	2398	52687	protein_coding	0.63549	20.1321	46.1982	0.0037	0.0105	0.352381	0.1995	1.0484	0.19029	0	0.064	0.194	6	0.00323438	ENSP00000355721	0	0	0	0	0	0
ENSG00000081692.8	ENSG00000081692	JMJD4	1	227918126	227923112	2	3747	4986	protein_coding	0.710681	36.9549	93.6449	0.0637	0.17	0.374706	0.1397	1.5742	0.0887435	0	0	0.029	NA	0.00475476	NA	0	0	0	0	0	0
ENSG00000185888.5	ENSG00000185888	PRSS38	1	228003394	228034171	5	1262	30777	protein_coding	0.998586	4.54805	4.43257	0.0071	0.0123	0.577236	0.3035	0.9113	0.333041	4	NA	NA	NA	0.000884816	NA	0	0	0	0	0	0
ENSG00000143816.7	ENSG00000143816	WNT9A	1	228106357	228135599	4	3967	29242	protein_coding	0.800532	14.3794	84.7817	0	0.0405	0	0.0081	0.8691	0.00931999	0	NA	NA	9	0.00178386	ENSP00000272164	0	1	0	0	0	0
ENSG00000154342.4	ENSG00000154342	WNT3A	1	228194752	228248961	4	2928	54209	protein_coding	0.93795	2.98356	3.04817	0	0.0238	0	0.0188	1.3765	0.0136578	0	0	NA	12	0.000438974	ENSP00000284523	0	1	0	0	0	0
ENSG00000143761.9	ENSG00000143761	ARF1	1	228270361	228286912	5	2001	16551	protein_coding	0.303295	167.619	1484.95	0	0.0444	0	0	0.5271	0	0	0	0.022	326	0.0288833	ENSP00000272102	0	0	0	0	0	0
ENSG00000143793.8	ENSG00000143793	C1orf35	1	228288427	228293112	9	3545	4685	protein_coding	0.390725	7.57129	17.9071	0.0049	0.0288	0.170139	0.1386	1.0841	0.127848	5	0.012	0	NA	0.00100611	NA	0	0	0	0	0	0
ENSG00000162910.14	ENSG00000162910	MRPL55	1	228294380	228297013	6	1417	2633	protein_coding	0.385018	23.8318	105.369	0.0132	0.0097	1.36082	0.1832	0.895	0.204693	2	0.002	0.085	133	0.00451021	ENSP00000355692	0	0	0	0	0	0
ENSG00000143774.12	ENSG00000143774	GUK1	1	228327663	228336685	4	2545	9022	protein_coding	0.583898	99.7396	2687.52	0.0102	0.0532	0.191729	0.1715	1.7434	0.098371	0	0.047	0.004	174	0.0156548	ENSP00000355689	0	0	0	0	0	0
ENSG00000198835.3	ENSG00000198835	GJC2	1	228337553	228347527	2	2241	9974	protein_coding	0.686054	5.86749	219.922	0.0019	0.0174	0.109195	0.0752	1.4417	0.0521606	0	0.007	0.001	NA	0.000969616	NA	1	0	0	0	0	0
ENSG00000203684.5	ENSG00000203684	IBA57-AS1	1	228351787	228353213	2	592	1426	protein_coding	0.968221	18.0868	40.9831	NA	NA	NA	NA	NA	NA	8	0	NA	NA	0.00393576	NA	0	0	0	0	0	0
ENSG00000181873.8	ENSG00000181873	IBA57	1	228353516	228369958	3	9812	16442	protein_coding	0.741371	4.2677	0.871034	0.0062	0.0494	0.125506	0.1773	0.9373	0.18916	0	0.017	NA	7	0.000199639	ENSP00000355672	0	0	0	0	0	0
ENSG00000162913.9	ENSG00000162913	C1orf145	1	228391207	228401365	4	2889	10158	protein_coding	0.917884	5.35725	40.7833	0	0.0856	0	NA	NA	NA	0	0.006	NA	NA	0.000794714	NA	0	0	0	0	0	0
ENSG00000154358.15	ENSG00000154358	OBSCN	1	228395831	228566577	116	26811	170746	protein_coding	0.970938	103.784	1074.26	NA	NA	NA	0.1111	0.9119	0.121834	0	0	0.091	223	0.000285834	ENSP00000455507	0	0	0	0	0	0
ENSG00000154370.9	ENSG00000154370	TRIM11	1	228581374	228594541	5	5769	13167	protein_coding	0.552931	6.9423	16.9427	0	0.0203	0	0.0474	1.2321	0.0384709	0	0.06	0.024	42	0.000636637	ENSP00000284551	0	0	1	0	0	0
ENSG00000162931.7	ENSG00000162931	TRIM17	1	228595641	228604562	6	2646	8921	protein_coding	0.961447	22.3271	55.3852	0.01	0.0471	0.212314	0.1272	1.407	0.0904051	5	0	0.041	45	0.00344306	ENSP00000295033	0	0	0	0	0	0
ENSG00000168148.3	ENSG00000168148	HIST3H3	1	228612546	228613026	1	480	480	protein_coding	0.977588	2.90254	2.95657	NA	NA	NA	NA	NA	NA	5	0	NA	120	0.000642476	ENSP00000355657	0	0	0	0	0	0
ENSG00000181218.4	ENSG00000181218	HIST3H2A	1	228645065	228645560	1	495	495	protein_coding	0.749639	20.887	1162.81	0	0.0238	0	0.0033	3.3376	0.000988734	5	0	0.09	138	0.00461869	ENSP00000355656	0	0	0	0	0	0
ENSG00000196890.3	ENSG00000196890	HIST3H2BB	1	228645808	228646259	1	451	451	protein_coding	0.894069	4.54316	99.8895	0	0.0628	0	0.0125	2.6933	0.00464115	5	0	0	120	0.00101068	ENSP00000375736	0	0	0	0	0	0
ENSG00000168159.9	ENSG00000168159	RNF187	1	228674762	228683467	4	3013	8705	protein_coding	0.665987	88.9794	822.313	0	0	NA	0.0197	1.6189	0.0121688	NA	NA	NA	NA	0.0129258	NA	0	0	0	0	0	0
ENSG00000116574.4	ENSG00000116574	RHOU	1	228870824	228882416	3	4369	11592	protein_coding	0.518449	22.6873	254.534	0	0.0253	0	0.0441	0.8759	0.0503482	0	0	0.23	34	0.00262978	ENSP00000355652	0	0	0	0	0	0
ENSG00000177800.2	ENSG00000177800	TMEM78	1	229385383	229387557	1	2174	2174	protein_coding	0.869777	0.0587039	0.00151133	NA	NA	NA	NA	NA	NA	6	NA	NA	NA	9.81e-06	NA	0	0	0	0	0	0
ENSG00000168118.7	ENSG00000168118	RAB4A	1	229406822	229441641	8	2958	34819	protein_coding	0.521789	35.2417	196.699	0.0029	0.0166	0.174699	0.0109	0.7781	0.0140085	0	0	0.112	3	0.00515933	ENSP00000355651	0	0	0	0	0	0
ENSG00000154429.6	ENSG00000154429	CCSAP	1	229456758	229479041	4	5153	22283	protein_coding	0.833906	13.3426	42.94	0.0032	0.0166	0.192771	0.1714	0.8345	0.205392	NA	0.04	NA	NA	0.00135202	NA	0	0	0	0	0	0
ENSG00000143632.10	ENSG00000143632	ACTA1	1	229566992	229569845	7	1484	2853	protein_coding	0.993084	16881.9	1.21748e+08	0.001	0.0398	0.0251256	0.0012	1.1575	0.00103672	0	0	0	1132	3.16705	ENSP00000355645	1	1	0	0	0	0
ENSG00000069248.9	ENSG00000069248	NUP133	1	229577045	229644103	26	4143	67058	protein_coding	0.34451	14.0765	9.97192	0.0033	0.0104	0.317308	0.0964	0.7917	0.121763	0	NA	NA	221	0.00169619	ENSP00000261396	0	1	0	0	0	0
ENSG00000135776.4	ENSG00000135776	ABCB10	1	229652329	229694442	13	3844	42113	protein_coding	0.504733	9.45735	3.46539	0.0048	0.0183	0.262295	0.1377	0.794	0.173426	0	0	0.016	56	0.00119618	ENSP00000355637	0	0	0	0	0	0
ENSG00000135801.5	ENSG00000135801	TAF5L	1	229728858	229761794	4	4058	32936	protein_coding	0.473567	7.77089	11.016	0	0.019	0	0.0337	0.6467	0.0521107	0	0.071	0	125	0.000948049	ENSP00000258281	0	0	0	0	0	0
ENSG00000135763.5	ENSG00000135763	URB2	1	229761981	229795946	10	5603	33965	protein_coding	0.673176	5.58673	9.58119	0.0065	0.0144	0.451389	0.1937	0.6044	0.320483	0	0	0.042	1	0.000527185	ENSP00000258243	0	0	0	0	0	0
ENSG00000143641.8	ENSG00000143641	GALNT2	1	230193536	230417870	16	4438	224334	protein_coding	0.611219	39.2016	652.98	0	0.0058	0	0.0173	0.8207	0.0210796	0	0.034	0.061	NA	0.00448935	NA	0	0	0	0	0	0
ENSG00000177614.5	ENSG00000177614	PGBD5	1	230457392	230561475	9	3434	104083	protein_coding	0.916763	26.4265	224.626	0.0716	0.2505	0.285828	0.0213	1.0851	0.0196295	0	0	0.135	NA	0.00357431	NA	0	0	0	0	0	0
ENSG00000135775.9	ENSG00000135775	COG2	1	230778235	230829728	10	7826	51493	protein_coding	0.524543	12.2878	6.86867	0.002	0.012	0.166667	0.0794	0.8545	0.0929198	0	NA	NA	3	0.000800774	ENSP00000355629	0	0	0	0	0	0
ENSG00000135744.7	ENSG00000135744	AGT	1	230838269	230850043	5	2286	11774	protein_coding	0.981055	727.33	196826	0.008	0.0499	0.160321	0.2843	1.2222	0.232613	2	0.151	NA	33	0.11919	ENSP00000355627	1	1	0	0	0	0
ENSG00000135773.8	ENSG00000135773	CAPN9	1	230883130	230937749	19	2465	54619	protein_coding	0.946593	16.2087	307.919	0.0015	0.0074	0.202703	0.0742	0.8115	0.0914356	0	0.238	NA	731	0.00257786	ENSP00000271971	0	0	0	0	0	0
ENSG00000119280.12	ENSG00000119280	C1orf198	1	230972865	231005335	4	3854	32470	protein_coding	0.6641	60.8268	805.235	0.0161	0.0235	0.685106	0.1087	1.0666	0.101913	0	0	0.082	NA	0.00767509	NA	0	0	0	0	0	0
ENSG00000143643.8	ENSG00000143643	TTC13	1	231041989	231114621	23	3230	72632	protein_coding	0.653847	15.1496	16.035	0.0005	0.0029	0.172414	0.0411	0.8825	0.0465722	0	0.063	0.064	210	0.00211512	ENSP00000355621	0	0	0	0	0	0
ENSG00000173409.9	ENSG00000173409	ARV1	1	231114727	231136341	6	1329	21614	protein_coding	0.591857	16.8585	14.0781	0.0024	0.0168	0.142857	0.1083	0.7935	0.136484	0	0.059	0.187	6	0.00324996	ENSP00000312458	0	0	0	0	0	0
ENSG00000182118.5	ENSG00000182118	FAM89A	1	231154704	231175992	3	1573	21288	protein_coding	0.822891	24.8441	207.429	0.0022	0	NA	0.0932	1.0144	0.091877	0	0.036	0.258	NA	0.00457907	NA	0	0	0	0	0	0
ENSG00000119283.11	ENSG00000119283	TRIM67	1	231297858	231357302	10	9310	59444	protein_coding	0.925703	0.575928	3.88613	0.0022	0.0318	0.0691824	0.032	0.8556	0.0374007	0	0	NA	3	2.93e-05	ENSP00000355613	0	0	0	0	0	0
ENSG00000143633.8	ENSG00000143633	C1orf131	1	231359509	231376933	2	2655	17424	protein_coding	0.447737	4.25905	1.2394	0.0095	0.0123	0.772358	0.2423	0.81	0.299136	NA	0.007	0.036	NA	0.000656746	NA	0	0	0	0	0	0
ENSG00000116906.7	ENSG00000116906	GNPAT	1	231376953	231413719	16	2627	36766	protein_coding	0.538726	32.1101	76.5146	0.0038	0.0116	0.327586	0.1213	0.6931	0.175011	0	0.09	0.019	2	0.00497187	ENSP00000355607	1	0	0	0	0	0
ENSG00000010072.11	ENSG00000010072	SPRTN	1	231472850	231490769	4	3555	17919	protein_coding	0.725532	6.27964	2.32401	0.0011	0.0119	0.092437	0.2095	0.914	0.229212	0	0	NA	246	0.000833273	ENSP00000295050	0	0	0	0	0	0
ENSG00000135766.8	ENSG00000135766	EGLN1	1	231499497	231560790	5	7092	61293	protein_coding	0.87421	83.3193	2278.72	0.026	0.0241	1.07884	0.1353	0.5789	0.233719	0	0.098	0.085	3	0.00612903	ENSP00000355601	0	1	0	0	0	0
ENSG00000116918.9	ENSG00000116918	TSNAX	1	231664399	231702270	5	5624	37871	protein_coding	0.373307	21.3223	90.5109	0.0015	0.0058	0.258621	0.0463	0.6701	0.0690942	0	0	0.008	13	0.00200175	ENSP00000355599	0	0	0	0	0	0
ENSG00000270106.1	ENSG00000270106	TSNAX-DISC1	1	231664399	231954990	14	3543	290591	protein_coding	0.893297	0.605992	0.115894	NA	NA	NA	NA	NA	NA	NA	NA	NA	NA	8.06e-05	NA	0	0	0	0	0	0
ENSG00000162946.16	ENSG00000162946	DISC1	1	231762561	232177018	13	7046	414457	protein_coding	0.737264	2.82353	1.31478	0.013	0.0239	0.543933	0.4403	1.0011	0.439816	NA	0.119	0.091	NA	0.000209087	NA	0	0	0	0	0	0
ENSG00000116991.6	ENSG00000116991	SIPA1L2	1	232533711	232697304	22	6668	163593	protein_coding	0.629472	15.3201	40.2933	0.002	0.0128	0.15625	0.0425	0.9602	0.0442616	0	0	0.189	NA	0.00120819	NA	0	0	0	0	0	0
ENSG00000212916.3	ENSG00000212916	MAP10	1	232940643	232946092	1	5449	5449	protein_coding	0.737521	1.85012	0.552078	0.0064	0.0044	1.45455	0.363	0.7975	0.455172	2	0.1	NA	NA	0.000179008	NA	0	0	0	0	0	0
ENSG00000135778.7	ENSG00000135778	NTPCR	1	233086351	233119628	2	8703	33277	protein_coding	0.444538	2.2264	0.320642	0.1003	0.0482	2.08091	0.1074	0.8032	0.133715	1	NA	NA	NA	0.000125434	NA	0	0	0	0	0	0
ENSG00000135749.14	ENSG00000135749	PCNXL2	1	233119181	233431459	34	7484	312278	protein_coding	0.796489	7.34893	7.1736	0.0039	0.0128	0.304688	0.1083	0.889	0.121822	0	NA	NA	4	0.000506586	ENSP00000258229	0	0	0	0	0	0
ENSG00000143674.6	ENSG00000143674	MLK4	1	233463514	233520894	10	5799	57380	protein_coding	0.827186	5.15642	8.93249	0.0064	0.0187	0.342246	0.1849	0.9359	0.197564	NA	0.024	NA	751	0.000470989	ENSP00000355583	0	0	0	0	0	0
ENSG00000135750.10	ENSG00000135750	KCNK1	1	233749750	233808258	3	2158	58508	protein_coding	0.794259	16.4355	226.175	0	0.0339	0	0.0223	0.857	0.026021	0	0	NA	NA	0.00274672	NA	0	0	0	0	0	0
ENSG00000183780.8	ENSG00000183780	SLC35F3	1	234040679	234460262	8	2883	419583	protein_coding	0.944553	5.96645	23.3384	0.0019	0.0109	0.174312	0.0771	0.6832	0.112851	0	0.046	0.745	NA	0.000886043	NA	0	0	0	0	0	0
ENSG00000168275.10	ENSG00000168275	COA6	1	234509202	234519795	2	1011	10593	protein_coding	0.643385	20.7925	63.6392	0.256	0.3549	0.72133	0.1122	1.6292	0.0688682	2	0.537	NA	91	0.00421772	ENSP00000355572	0	0	0	0	0	0
ENSG00000059588.5	ENSG00000059588	TARBP1	1	234527059	234614849	30	5100	87790	protein_coding	0.655826	17.8884	122.222	0.0058	0.0156	0.371795	0.1657	0.8284	0.200024	0	0	0.154	123	0.00183578	ENSP00000040877	0	0	0	0	0	0
ENSG00000168264.6	ENSG00000168264	IRF2BP2	1	234740015	234745271	2	4661	5256	protein_coding	0.457317	68.0306	698.245	0.0016	0.0176	0.0909091	0.1018	0.5731	0.17763	0	0	0.086	NA	0.00750346	NA	0	0	0	0	0	0
ENSG00000173726.6	ENSG00000173726	TOMM20	1	235272651	235292251	5	3382	19600	protein_coding	0.539544	94.932	1356.47	0	0.0125	0	0.0032	0.3571	0.00896108	0	0.009	0	194	0.0129604	ENSP00000355566	0	0	0	0	0	0
ENSG00000188739.10	ENSG00000188739	RBM34	1	235294498	235324772	11	2043	30274	protein_coding	0.816241	0.148378	0.0480701	0.0095	0.0096	0.989583	0.2035	0.7366	0.276269	2	NA	0.036	338	2.53e-05	ENSP00000386226	0	0	0	0	0	0
ENSG00000054267.16	ENSG00000054267	ARID4B	1	235294949	235491534	24	6043	196585	protein_coding	0.477844	15.4867	9.18997	0.0016	0.0073	0.219178	0.0492	0.4392	0.112022	0	0	0.012	110	0.0013584	ENSP00000264183	0	1	0	0	0	0
ENSG00000152904.7	ENSG00000152904	GGPS1	1	235490665	235507847	4	2891	17182	protein_coding	0.583993	13.1395	5.5023	0	0.0095	0	0.0319	0.4801	0.0664445	0	0.008	0.089	32	0.00194166	ENSP00000282841	0	0	0	0	0	0
ENSG00000116957.8	ENSG00000116957	TBCE	1	235530675	235612283	18	1962	81608	protein_coding	0.441473	15.2283	9.60805	0.0036	0.0101	0.356436	0.1627	0.5668	0.28705	0	0.16	0.183	16	0.0026303	ENSP00000355560	1	0	0	0	0	0
ENSG00000162885.8	ENSG00000162885	B3GALNT2	1	235613238	235667781	6	3088	54543	protein_coding	0.545626	4.49163	2.22896	0.002	0.0045	0.444444	0.0715	0.4765	0.150052	0	NA	NA	NA	0.000643998	NA	0	0	0	0	0	0
ENSG00000168243.6	ENSG00000168243	GNG4	1	235710987	235814054	4	5100	103067	protein_coding	0.933034	20.5739	131.424	0	0.0148	0	0.0058	0.761	0.00762155	1	0.005	NA	NA	0.00211269	NA	0	0	0	0	0	0
ENSG00000143669.9	ENSG00000143669	LYST	1	235824341	236046940	53	13427	222599	protein_coding	0.556963	6.68984	13.6229	0.0042	0.0098	0.428571	0.0788	0.4981	0.158201	0	0	0	13	0.000171205	ENSP00000374443	0	0	1	0	0	0
ENSG00000116962.10	ENSG00000116962	NID1	1	236139130	236228462	20	5844	89332	protein_coding	0.678418	128.331	3782.45	0.0042	0.0251	0.167331	0.0801	0.6229	0.128592	0	0	0.079	44	0.0115961	ENSP00000264187	0	0	0	0	0	0
ENSG00000077585.9	ENSG00000077585	GPR137B	1	236305832	236385165	7	2032	79333	protein_coding	0.712104	29.1247	179.732	0	0	NA	0.0229	0.4438	0.0515998	0	0.066	0.366	NA	0.00497722	NA	0	0	0	0	0	0
ENSG00000086619.9	ENSG00000086619	ERO1LB	1	236378855	236445319	16	4551	66464	protein_coding	0.922411	57.1934	572.435	0.0073	0.0165	0.442424	0.0351	0.6289	0.0558117	0	0.275	0.128	37	0.00642854	ENSP00000346635	0	0	0	0	0	0
ENSG00000186197.8	ENSG00000186197	EDARADD	1	236511562	236648214	6	3091	136652	protein_coding	0.871335	4.82655	24.6176	0.0025	0.0157	0.159236	0.1527	0.6316	0.241767	4	0	0	NA	0.000692418	NA	0	1	0	0	0	0
ENSG00000116977.14	ENSG00000116977	LGALS8	1	236681300	236716281	14	6406	34981	protein_coding	0.708995	17.1515	20.2887	0.0101	0.0193	0.523316	0.1134	0.5964	0.190141	0	0.083	0.292	5	0.00141887	ENSP00000309576	0	0	0	0	0	1
ENSG00000119285.6	ENSG00000119285	HEATR1	1	236712305	236767804	45	8402	55499	protein_coding	0.708228	16.926	18.9395	0.0025	0.0067	0.373134	0.0943	0.5501	0.171423	0	0.194	0.111	487	0.000999514	ENSP00000355541	0	0	0	0	0	0
ENSG00000077522.8	ENSG00000077522	ACTN2	1	236849754	236927931	21	4842	78177	protein_coding	0.969738	661.927	90970.8	0.004	0.0545	0.0733945	0.0033	0.6637	0.00497213	0	0	NA	152	0.0708771	ENSP00000355537	0	0	0	0	0	0
ENSG00000116984.8	ENSG00000116984	MTR	1	236958610	237067281	33	10496	108671	protein_coding	0.439923	13.4681	21.135	0.0008	0.013	0.0615385	0.0422	0.4376	0.0964351	0	0.074	0.064	13	0.000563157	ENSP00000355536	1	1	0	0	0	0
ENSG00000244020.2	ENSG00000244020	MT1HL1	1	237167403	237167718	1	315	315	protein_coding	0.944471	0.638296	0.311613	NA	NA	NA	0.1296	4.6541	0.0278464	NA	NA	NA	NA	0.000145287	NA	0	0	0	0	0	0
ENSG00000198626.11	ENSG00000198626	RYR2	1	237205505	237997288	105	16457	791783	protein_coding	0.962342	67.0304	1575.85	0.0004	0.0181	0.0220994	0.0122	0.7368	0.0165581	0	NA	NA	58	0.00103464	ENSP00000355533	1	1	0	0	0	0
ENSG00000116996.5	ENSG00000116996	ZP4	1	238045705	238054094	12	1787	8389	protein_coding	0.993109	0.263874	0.936577	0.0055	0.0249	0.220884	NA	NA	NA	0	NA	NA	4	4.7e-05	ENSP00000355529	0	0	1	0	0	0
ENSG00000270188.1	ENSG00000270188	MTRNR2L11	1	238107024	238108575	1	1551	1551	protein_coding	0.871869	0.0014726	0.000222289	NA	NA	NA	NA	NA	NA	NA	NA	NA	NA	2.72e-07	NA	0	0	0	0	0	0
ENSG00000133019.7	ENSG00000133019	CHRM3	1	239549865	240078750	5	8773	528885	protein_coding	0.750103	0.684739	0.363353	0.0015	0.0165	0.0909091	0.0414	0.6668	0.0620876	0	0.031	NA	NA	3.81e-05	NA	1	0	0	0	0	0
ENSG00000155816.15	ENSG00000155816	FMN2	1	240177648	240638489	18	6416	460841	protein_coding	0.935278	8.46017	4.98029	NA	NA	NA	0.1098	0.5326	0.206158	0	0.096	NA	NA	0.000696723	NA	0	0	0	0	0	0
ENSG00000268365.1	ENSG00000268365	AL646016.1	1	240629183	240643504	2	67	14321	protein_coding	NA	0	0	NA	NA	NA	NA	NA	NA	NA	NA	NA	NA	0	NA	0	0	0	0	0	0
ENSG00000180875.4	ENSG00000180875	GREM2	1	240652873	240775449	2	4168	122576	protein_coding	0.815588	12.7649	97.1837	0	0.0207	0	0.0187	0.7489	0.02497	0	0	0.098	NA	0.0015334	NA	0	0	0	0	0	0
ENSG00000182901.11	ENSG00000182901	RGS7	1	240931554	241520530	18	2476	588976	protein_coding	0.988763	20.459	64.8046	0.0123	0.0491	0.250509	0.0079	0.4508	0.0175244	0	0	0	2	0.00325613	ENSP00000355523	0	0	0	0	0	0
ENSG00000091483.6	ENSG00000091483	FH	1	241660903	241683061	10	1787	22158	protein_coding	0.601307	72.6685	751.947	0.0028	0.0138	0.202899	0.0377	0.53	0.0711321	0	0.025	0	307	0.0129529	ENSP00000355518	1	1	0	0	0	0
ENSG00000117009.7	ENSG00000117009	KMO	1	241695434	241758944	15	5246	63510	protein_coding	0.955311	7.67405	16.3553	0.0068	0.0124	0.548387	0.1236	0.6394	0.193306	0	0	0.06	82	0.000767703	ENSP00000355517	0	0	0	0	0	0
ENSG00000054277.8	ENSG00000054277	OPN3	1	241753404	241840678	4	2616	87274	protein_coding	0.823147	9.81973	18.5269	0.0011	0.013	0.0846154	0.0683	0.5637	0.121164	0	0.033	0.145	NA	0.00152378	NA	0	0	0	0	0	0
ENSG00000203668.1	ENSG00000203668	CHML	1	241792155	241799232	1	7077	7077	protein_coding	0.712025	7.191	10.8031	NA	NA	NA	0.1179	0.5433	0.217007	4	0.022	0.037	7	0.000530349	ENSP00000355511	0	0	0	0	0	0
ENSG00000162843.13	ENSG00000162843	WDR64	1	241815580	241965435	27	4344	149855	protein_coding	0.993213	3.44504	1.90078	0.0051	0.0161	0.31677	0.1314	0.6555	0.200458	2	NA	NA	29	0.000401349	ENSP00000355510	0	0	0	0	0	0
ENSG00000174371.12	ENSG00000174371	EXO1	1	242011269	242058450	16	3457	47181	protein_coding	0.960201	7.73552	5.64506	0.0051	0.0081	0.62963	0.1593	0.8286	0.192252	0	0.004	0	324	0.00104391	ENSP00000311873	0	0	1	1	0	0
ENSG00000197769.5	ENSG00000197769	MAP1LC3C	1	242158792	242162375	4	1178	3583	protein_coding	0.834601	10.7243	173.147	0.006	0.0306	0.196078	NA	NA	NA	0	0.053	NA	282	0.00211012	ENSP00000349785	0	0	0	0	0	0
ENSG00000180287.12	ENSG00000180287	PLD5	1	242246288	242687998	10	8711	441710	protein_coding	0.939324	3.88758	4.33819	0.0141	0.0518	0.272201	0.0279	0.4966	0.056182	NA	NA	NA	1	0.000218514	ENSP00000440896	0	0	0	0	0	0
ENSG00000143702.11	ENSG00000143702	CEP170	1	243287730	243418650	20	6808	130920	protein_coding	0.7023	12.5369	19.3281	0.0006	0.0079	0.0759494	0.0572	0.4655	0.122879	0	0	0.056	NA	0.000964314	NA	0	0	0	0	0	0
ENSG00000269795.1	ENSG00000269795	AC092782.1	1	243388058	243395911	2	61	7853	protein_coding	NA	0	0	NA	NA	NA	NA	NA	NA	NA	NA	NA	NA	0	NA	0	0	0	0	0	0
ENSG00000054282.11	ENSG00000054282	SDCCAG8	1	243419320	243663394	18	2549	244074	protein_coding	0.552459	8.00187	2.99498	0.0052	0.0121	0.429752	0.1315	0.6224	0.211279	0	0.041	0.186	NA	0.00125531	NA	1	0	0	0	0	0
ENSG00000117020.12	ENSG00000117020	AKT3	1	243651535	244014381	14	5113	362846	protein_coding	0.615489	20.8051	42.5838	0	0.0066	0	0.0019	0.2801	0.00678329	NA	0.006	0.051	109	0.00212858	ENSP00000263826	1	0	0	0	0	0
ENSG00000179456.9	ENSG00000179456	ZBTB18	1	244214585	244220778	2	3849	6193	protein_coding	0.833508	44.062	2193.2	0.0009	0.0081	0.111111	0.0026	0.1766	0.0147225	0	0.066	NA	330	0.0055716	ENSP00000351539	0	1	0	0	0	0
ENSG00000268146.1	ENSG00000268146	AL590483.1	1	244227632	244231211	1	3579	3579	protein_coding	0.916813	0.0324986	0.587319	NA	NA	NA	NA	NA	NA	NA	NA	NA	NA	4.3e-06	NA	0	0	0	0	0	0
ENSG00000173728.6	ENSG00000173728	C1orf100	1	244515937	244552965	2	839	37028	protein_coding	0.99558	22.0328	89.2555	0.003	0.052	0.0576923	0.1842	0.5119	0.359836	5	0	NA	NA	0.00459082	NA	0	0	0	0	0	0
ENSG00000035687.9	ENSG00000035687	ADSS	1	244571796	244615436	13	2767	43640	protein_coding	0.636806	33.7998	29.599	0.0032	0.0028	1.14286	0.0161	0.3408	0.0472418	0	0.066	0.228	340	0.00511441	ENSP00000355493	0	0	0	0	0	0
[truncated: 17,685 more rows]
