# Supplementary material for: The regulatory genome constrains protein sequence evolution: implications for the search for disease-associated genes
Source: PeerJ. 2020 Jul 21;8:e9554. doi: 10.7717/peerj.9554 (PMC7380284; doi:10.7717/peerj.9554)
Supplement: Supplemental Information 5 [file peerj-08-9554-s005.xlsx]

## Sheet: Sheet1
This table shows the AIC values obtained for each trait when using protein evolution rate (from human-mouse comparison) as the dependent variable.
Correlation Trait With dN/dS	AIC
Expression level	-12587.3
Expression variance	-12587.3
Tau	-12949.8
Number of interactions	-12669
DGN heritability	-12664.3
