# Supplementary material for: The regulatory genome constrains protein sequence evolution: implications for the search for disease-associated genes
Source: PeerJ. 2020 Jul 21;8:e9554. doi: 10.7717/peerj.9554 (PMC7380284; doi:10.7717/peerj.9554)
Supplement: Supplemental Information 6 [file peerj-08-9554-s006.xlsx]

## Sheet: Results
This table shows the results of comparing various gene sets to their protein-coding complement for a variety of traits. Results are for a Mann-Whitney U test.
	Gene Set	Mendelian Genes	Essential Genes	Loss-of-Function Tolerant Genes	Olfactory Genes	Immune Response Genes	Adaptive Immune Response Genes
	Number of Genes in Set	1867	2457	90	398	1418	331
maximum Expression	W	12961000	25579000	902060	7231900	9641000	2630300
	p-value	< 2.2e-16	< 2.2e-16	0.6802	< 2.2e-16	< 2.2e-16	3.155e-08
	Direction in Set	Higher	Higher	NA	Lower	Higher	Higher
dN	W	14532000	13302000	472600	1077400	10183000	2414900
	p-value	4.719e-08	< 2.2e-16	1.406e-06	< 2.2e-16	0.1342	0.004267
	Direction in Set	Lower	Lower	Higher	Higher	NA	Higher
dN/dS	W	13293000	11602000	439220	971270	8924900	2115600
	p-value	7.681e-13	< 2.2e-16	4.924e-06	< 2.2e-16	0.3061	0.0005812
	Direction in Set	Lower	Lower	Higher	Higher	NA	Higher
Tau	W	16623000	17996000	696830	2165500	11596000	2551800
	p-value	0.534	< 2.2e-16	0.0008222	< 2.2e-16	1.339e-09	6.765e-10
	Direction in Set	NA	Lower	Higher	Higher	Lower	Lower
Gene Branch	W	16326000	12708000	603200	884680	8636800	2051100
	p-value	< 2.2e-16	< 2.2e-16	0.02957	< 2.2e-16	< 2.2e-16	6.887e-12
	Direction in Set	Lower	Lower	Higher	Higher	Higher	Higher
Network Connections	W	8125700	10663000	381930	103930	5991100	1451600
	p-value	0.2366	0.01089	0.3553	0.1902	0.0001752	0.01032
	Direction in Set	NA	Higher	NA	NA	Lower	Lower
mRNA Length	W	19615000	27423000	909160	959180	12192000	3116400
	p-value	< 2.2e-16	< 2.2e-16	0.5724	< 2.2e-16	0.000689	0.4563
	Direction in Set	Higher	Higher	NA	Lower	Lower	NA
Heritability	W	7167200	8008000	408590	111080	5873600	1603000
	p-value	0.0002176	5.703e-11	0.0001789	0.2531	0.8764	0.4154
	Direction in Set	Higher	Lower	Higher	NA	NA	NA
