# Supplementary material for: The regulatory genome constrains protein sequence evolution: implications for the search for disease-associated genes
Source: PeerJ. 2020 Jul 21;8:e9554. doi: 10.7717/peerj.9554 (PMC7380284; doi:10.7717/peerj.9554)
Supplement: Supplemental Information 7 [file peerj-08-9554-s007.xlsx]

## Sheet: Sheet1
Correlation between evolutionary rate (dN/dS) and out-of-sample prediction R2 in GTEx tissues
Tissue	p-value	Spearman's rho
Adipose-Subcutaneous	8.59907e-14	0.0892927
AdrenalGland	4.35296e-08	0.0714873
Artery-Aorta	7.39198e-11	0.0803109
Artery-Coronary	4.62043e-09	0.078609
Artery-Tibial	7.02738e-09	0.0696699
Brain-Anteriorcingulatecortex-BA24	0.000145508	0.0517611
Brain-Caudate-basalganglia	1.16814e-08	0.0753325
Brain-CerebellarHemisphere	1.79651e-07	0.0670894
Brain-Cerebellum	3.7753e-05	0.051454
Brain-Cortex	1.29045e-08	0.0750434
Brain-FrontalCortex-BA9	1.97253e-09	0.0793786
Brain-Hippocampus	0.00245379	0.0415003
Brain-Hypothalamus	3.59192e-05	0.0568199
Brain-Nucleusaccumbens-basalganglia	2.21401e-05	0.0567818
Brain-Putamen-basalganglia	0.00436634	0.03851
Breast-MammaryTissue	9.48555e-09	0.0749917
Cells-EBV-transformedlymphocytes	2.45269e-06	0.0608593
Cells-Transformedfibroblasts	4.38873e-13	0.0859661
Colon-Sigmoid	9.65312e-07	0.0633275
Colon-Transverse	1.98396e-10	0.081553
Esophagus-GastroesophagealJunction	4.66292e-08	0.0706396
Esophagus-Mucosa	7.65918e-08	0.0646231
Esophagus-Muscularis	1.09694e-12	0.0873831
Heart-AtrialAppendage	1.03185e-06	0.0627299
Heart-LeftVentricle	1.57662e-06	0.0605816
Liver	0.000221955	0.0502766
Lung	7.75241e-11	0.079968
Muscle-Skeletal	2.63617e-06	0.057316
Nerve-Tibial	7.38237e-11	0.0759306
Ovary	0.000230647	0.0499129
Pancreas	2.20282e-05	0.053475
Pituitary	2.11731e-06	0.0624758
Skin-NotSunExposed-Suprapubic	0.000117411	0.0484398
Skin-SunExposed-Lowerleg	1.11215e-06	0.0581147
SmallIntestine-TerminalIleum	0.00211241	0.0412167
Spleen	5.69322e-07	0.0650292
Stomach	1.31852e-05	0.0561552
Testis	1.72904e-05	0.0516556
Thyroid	7.46953e-12	0.0812696
